# Supplementary material
Source: publisher figshare collection journal article supplement (https://acs.figshare.com/ndownloader/files/3973804)
Supplement: Supplementary file 1 [file 3973804]

 
data_SAS520Bh
 
_audit_creation_method            SHELXL-2013
_chemical_name_systematic
;
 ?
;
_chemical_name_common             ?
_chemical_melting_point           ?
_chemical_formula_moiety          'C40 H40 N4 O4, C4 H8 O2'
_chemical_formula_sum
 'C44 H48 N4 O6' 
_chemical_formula_weight          728.86

loop_
 _atom_type_symbol
 _atom_type_description
 _atom_type_scat_dispersion_real
 _atom_type_scat_dispersion_imag
 _atom_type_scat_source
 'C'  'C'   0.0181   0.0091
 'International Tables Vol C Tables 4.2.6.8 and 6.1.1.4'
 'H'  'H'   0.0000   0.0000
 'International Tables Vol C Tables 4.2.6.8 and 6.1.1.4'
 'N'  'N'   0.0311   0.0180
 'International Tables Vol C Tables 4.2.6.8 and 6.1.1.4'
 'O'  'O'   0.0492   0.0322
 'International Tables Vol C Tables 4.2.6.8 and 6.1.1.4'
 
_space_group_crystal_system       monoclinic
_space_group_IT_number            14
_space_group_name_H-M_alt         'P 21/c'
_space_group_name_Hall            '-P 2ybc'
 
_shelx_space_group_comment
;
The symmetry employed for this shelxl refinement is uniquely defined
by the following loop, which should always be used as a source of
symmetry information in preference to the above space-group names.
They are only intended as comments.
;
 
loop_
 _space_group_symop_operation_xyz
 'x, y, z'
 '-x, y+1/2, -z+1/2'
 '-x, -y, -z'
 'x, -y-1/2, z-1/2'
 
_cell_length_a                    7.7338(2)
_cell_length_b                    26.7364(7)
_cell_length_c                    18.1360(5)
_cell_angle_alpha                 90
_cell_angle_beta                  102.2660(10)
_cell_angle_gamma                 90
_cell_volume                      3664.45(17)
_cell_formula_units_Z             4
_cell_measurement_temperature     100(2)
_cell_measurement_reflns_used     9802 
_cell_measurement_theta_min       3.31 
_cell_measurement_theta_max       68.22 
 
_exptl_crystal_description        prismatic 
_exptl_crystal_colour             dark_red 
_exptl_crystal_density_meas       ? 
_exptl_crystal_density_method     ?              
_exptl_crystal_density_diffrn     1.321          
_exptl_crystal_F_000              1552
_exptl_transmission_factor_min    ?                                             
_exptl_transmission_factor_max    ?                                             
_exptl_crystal_size_max           .515 
_exptl_crystal_size_mid           .278 
_exptl_crystal_size_min           .209 
_exptl_absorpt_coefficient_mu     0.710
_shelx_estimated_absorpt_T_min    ? 
_shelx_estimated_absorpt_T_max    ? 
_exptl_absorpt_correction_type    multi-scan 
_exptl_absorpt_correction_T_min   .6809 
_exptl_absorpt_correction_T_max   .7531 
_exptl_absorpt_process_details    Bruker-SADABS 
 
_exptl_special_details
;
 ?
;
 
_diffrn_ambient_temperature       100(2)
_diffrn_radiation_wavelength      1.54178
_diffrn_radiation_type            CuK\a
_diffrn_radiation_source         'Incoatec_ImuS'
_diffrn_radiation_monochromator  'multi_layered_optics'
_diffrn_measurement_device_type  'Bruker D8 QUEST PHOTON 100'
_diffrn_measurement_method        'omega_and_phi_scans' 
_diffrn_detector_area_resol_mean  ? 
_diffrn_reflns_number             43449
_diffrn_reflns_av_unetI/netI      0.0181
_diffrn_reflns_av_R_equivalents   0.0283
_diffrn_reflns_limit_h_min        -9
_diffrn_reflns_limit_h_max        9
_diffrn_reflns_limit_k_min        -32
_diffrn_reflns_limit_k_max        32
_diffrn_reflns_limit_l_min        -21
_diffrn_reflns_limit_l_max        21
_diffrn_reflns_theta_min          3.306
_diffrn_reflns_theta_max          68.293
_diffrn_reflns_theta_full         67.679
_diffrn_measured_fraction_theta_max   0.997
_diffrn_measured_fraction_theta_full  0.998
_diffrn_reflns_Laue_measured_fraction_max    0.997
_diffrn_reflns_Laue_measured_fraction_full   0.998
_diffrn_reflns_point_group_measured_fraction_max   0.997
_diffrn_reflns_point_group_measured_fraction_full  0.998
_reflns_number_total              6693
_reflns_number_gt                 6354
_reflns_threshold_expression      'I > 2\s(I)'
_reflns_Friedel_coverage          0.000
_reflns_Friedel_fraction_max      .
_reflns_Friedel_fraction_full     .
 
_reflns_special_details
;
 Reflections were merged by SHELXL according to the crystal
 class for the calculation of statistics and refinement.
 
 _reflns_Friedel_fraction is defined as the number of unique
 Friedel pairs measured divided by the number that would be
 possible theoretically, ignoring centric projections and
 systematic absences.
;
 
_computing_data_collection        'Bruker-SAINT V8.18C'
_computing_cell_refinement        'Bruker-SAINT V8.18C'
_computing_data_reduction         'Bruker-SAINT V8.18C'
_computing_structure_solution      SHELXS
_computing_structure_refinement   'SHELXL-2013 (Sheldrick, 2013)'
_computing_molecular_graphics     ?
_computing_publication_material   Bruker-SHELXTL
 
_refine_special_details
;
 ?
;
_refine_ls_structure_factor_coef  Fsqd
_refine_ls_matrix_type            full
_refine_ls_weighting_scheme       calc
_refine_ls_weighting_details
'w=1/[\s^2^(Fo^2^)+(0.0474P)^2^+1.6955P] where P=(Fo^2^+2Fc^2^)/3'
_atom_sites_solution_primary      direct
_atom_sites_solution_secondary    fourier
_atom_sites_solution_hydrogens    mixed
_refine_ls_hydrogen_treatment     mixed
_refine_ls_extinction_method      none
_refine_ls_extinction_coef        .
_refine_ls_number_reflns          6693
_refine_ls_number_parameters      516
_refine_ls_number_restraints      0
_refine_ls_R_factor_all           0.0398
_refine_ls_R_factor_gt            0.0379
_refine_ls_wR_factor_ref          0.0974
_refine_ls_wR_factor_gt           0.0959
_refine_ls_goodness_of_fit_ref    1.048
_refine_ls_restrained_S_all       1.048
_refine_ls_shift/su_max           0.001
_refine_ls_shift/su_mean          0.000
 
loop_
 _atom_site_label
 _atom_site_type_symbol
 _atom_site_fract_x
 _atom_site_fract_y
 _atom_site_fract_z
 _atom_site_U_iso_or_equiv
 _atom_site_adp_type
 _atom_site_occupancy
 _atom_site_site_symmetry_order  
 _atom_site_calc_flag
 _atom_site_refinement_flags_posn
 _atom_site_refinement_flags_adp
 _atom_site_refinement_flags_occupancy
 _atom_site_disorder_assembly
 _atom_site_disorder_group
N3 N 1.02068(13) 0.54828(4) 0.64782(5) 0.0165(2) Uani 1 1 d . . . . .
N1 N 0.85525(14) 0.69043(4) 0.53993(6) 0.0183(2) Uani 1 1 d . . . . .
N2 N 0.77761(13) 0.41642(4) 0.52504(6) 0.0161(2) Uani 1 1 d . . . . .
N16 N 0.42368(13) 0.56515(4) 0.29436(6) 0.0178(2) Uani 1 1 d . . . . .
C2 C 0.84781(15) 0.59842(4) 0.54623(7) 0.0160(2) Uani 1 1 d . . . . .
C13 C 0.62235(15) 0.46706(4) 0.43260(6) 0.0150(2) Uani 1 1 d . . . . .
C5 C 0.82081(15) 0.50782(4) 0.54206(6) 0.0152(2) Uani 1 1 d . . . . .
C25 C 0.65334(15) 0.55850(4) 0.43703(6) 0.0154(2) Uani 1 1 d . . . . .
C3 C 0.97161(15) 0.59586(4) 0.61932(7) 0.0167(2) Uani 1 1 d . . . . .
C1 C 0.80013(15) 0.64445(4) 0.51244(7) 0.0163(2) Uani 1 1 d . . . . .
C24 C 0.77365(15) 0.55489(4) 0.50834(7) 0.0150(2) Uani 1 1 d . . . . .
C18 C 0.61447(15) 0.60623(4) 0.40210(7) 0.0162(2) Uani 1 1 d . . . . .
C14 C 0.57500(15) 0.51418(4) 0.40089(6) 0.0151(2) Uani 1 1 d . . . . .
C19 C 0.68426(15) 0.64973(4) 0.43971(7) 0.0165(2) Uani 1 1 d . . . . .
C17 C 0.50975(16) 0.60856(4) 0.32400(7) 0.0187(2) Uani 1 1 d . . . . .
C9 C 0.59837(15) 0.30897(4) 0.40207(7) 0.0173(2) Uani 1 1 d . . . . .
C20 C 0.67160(15) 0.70360(4) 0.42558(7) 0.0170(2) Uani 1 1 d . . . . .
C12 C 0.58451(15) 0.41502(4) 0.41060(6) 0.0158(2) Uani 1 1 d . . . . .
C6 C 0.74682(15) 0.46493(4) 0.50429(6) 0.0150(2) Uani 1 1 d . . . . .
C37 C 0.31191(16) 0.56694(5) 0.21785(7) 0.0205(3) Uani 1 1 d . . . . .
H37A H 0.2782 0.6020 0.2046 0.025 Uiso 1 1 calc R U . . .
H37B H 0.2021 0.5476 0.2167 0.025 Uiso 1 1 calc R U . . .
C41 C 0.80132(16) 0.77840(5) 0.49585(7) 0.0189(3) Uani 1 1 d . . . . .
H41 H 0.8776 0.7924 0.5389 0.023 Uiso 1 1 calc R U . . .
C15 C 0.44100(15) 0.51879(4) 0.33025(7) 0.0166(2) Uani 1 1 d . . . . .
C34 C 1.14849(15) 0.54479(5) 0.72039(7) 0.0182(2) Uani 1 1 d . . . . .
H H 1.2367 0.5720 0.7235 0.022 Uiso 1 1 calc R U . . .
HA H 1.2121 0.5125 0.7228 0.022 Uiso 1 1 calc R U . . .
C43 C 0.9374(2) 0.24870(5) 0.65930(8) 0.0298(3) Uani 1 1 d . . . . .
H43A H 0.9954 0.2518 0.6158 0.036 Uiso 1 1 calc R U . . .
H43B H 0.8098 0.2561 0.6418 0.036 Uiso 1 1 calc R U . . .
C4 C 0.94743(15) 0.50384(4) 0.61439(7) 0.0160(2) Uani 1 1 d . . . . .
C7 C 0.68439(15) 0.38552(4) 0.46870(6) 0.0156(2) Uani 1 1 d . . . . .
C8 C 0.69167(15) 0.33345(4) 0.46614(7) 0.0169(2) Uani 1 1 d . . . . .
H8 H 0.7588 0.3150 0.5072 0.020 Uiso 1 1 calc R U . . .
C40 C 0.77987(15) 0.72680(5) 0.48883(7) 0.0174(2) Uani 1 1 d . . . . .
C22 C 0.59827(17) 0.78661(5) 0.37652(7) 0.0215(3) Uani 1 1 d . . . . .
HB H 0.5335 0.8074 0.3378 0.026 Uiso 1 1 calc R U . . .
C38 C 0.40818(18) 0.54546(5) 0.16000(7) 0.0245(3) Uani 1 1 d . . . . .
H38A H 0.4508 0.5114 0.1758 0.029 Uiso 1 1 calc R U . . .
H38B H 0.5126 0.5665 0.1582 0.029 Uiso 1 1 calc R U . . .
C42 C 1.00651(18) 0.33143(5) 0.69851(8) 0.0282(3) Uani 1 1 d . . . . .
C32 C 0.43238(17) 0.22952(5) 0.35459(7) 0.0223(3) Uani 1 1 d . . . . .
H32A H 0.3908 0.2435 0.3040 0.033 Uiso 1 1 calc R U . . .
H32B H 0.3469 0.2373 0.3858 0.033 Uiso 1 1 calc R U . . .
HC H 0.4442 0.1932 0.3510 0.033 Uiso 1 1 calc R U . . .
C33 C 0.73778(17) 0.24341(5) 0.33617(7) 0.0235(3) Uani 1 1 d . . . . .
H33A H 0.8562 0.2559 0.3590 0.035 Uiso 1 1 calc R U . . .
H33B H 0.6927 0.2611 0.2887 0.035 Uiso 1 1 calc R U . . .
HD H 0.7440 0.2075 0.3262 0.035 Uiso 1 1 calc R U . . .
C11 C 0.48634(16) 0.38955(5) 0.34748(7) 0.0188(2) Uani 1 1 d . . . . .
H11 H 0.4140 0.4077 0.3074 0.023 Uiso 1 1 calc R U . . .
C10 C 0.49577(16) 0.33818(5) 0.34414(7) 0.0200(3) Uani 1 1 d . . . . .
H10 H 0.4301 0.3216 0.3008 0.024 Uiso 1 1 calc R U . . .
C39 C 0.2887(2) 0.54310(6) 0.08164(8) 0.0330(3) Uani 1 1 d . . . . .
H39A H 0.1830 0.5233 0.0836 0.049 Uiso 1 1 calc R U . . .
H39B H 0.3527 0.5274 0.0466 0.049 Uiso 1 1 calc R U . . .
H39C H 0.2534 0.5770 0.0643 0.049 Uiso 1 1 calc R U . . .
C23 C 0.70946(16) 0.80929(4) 0.43889(7) 0.0193(3) Uani 1 1 d . . . . .
C26 C 0.72293(18) 0.86646(5) 0.44662(7) 0.0229(3) Uani 1 1 d . . . . .
C36 C 1.18639(19) 0.53720(7) 0.86137(8) 0.0365(4) Uani 1 1 d . . . . .
HE H 1.1255 0.5414 0.9032 0.055 Uiso 1 1 calc R U . . .
H36 H 1.2874 0.5601 0.8681 0.055 Uiso 1 1 calc R U . . .
HF H 1.2284 0.5027 0.8607 0.055 Uiso 1 1 calc R U . . .
C31 C 0.68662(18) 0.22518(5) 0.46502(7) 0.0230(3) Uani 1 1 d . . . . .
H31A H 0.8067 0.2372 0.4861 0.035 Uiso 1 1 calc R U . . .
H31B H 0.6896 0.1891 0.4557 0.035 Uiso 1 1 calc R U . . .
H31C H 0.6106 0.2319 0.5008 0.035 Uiso 1 1 calc R U . . .
C30 C 0.61290(16) 0.25237(4) 0.39058(7) 0.0187(3) Uani 1 1 d . . . . .
C35 C 1.05933(16) 0.54866(5) 0.78742(7) 0.0215(3) Uani 1 1 d . . . . .
H35A H 1.0117 0.5829 0.7895 0.026 Uiso 1 1 calc R U . . .
H35B H 0.9588 0.5250 0.7803 0.026 Uiso 1 1 calc R U . . .
C21 C 0.57896(16) 0.73524(5) 0.36899(7) 0.0200(3) Uani 1 1 d . . . . .
H21 H 0.5032 0.7214 0.3256 0.024 Uiso 1 1 calc R U . . .
C29 C 0.6756(2) 0.89264(5) 0.36948(8) 0.0283(3) Uani 1 1 d . . . . .
HG H 0.7505 0.8795 0.3366 0.042 Uiso 1 1 calc R U . . .
HH H 0.6951 0.9287 0.3763 0.042 Uiso 1 1 calc R U . . .
HI H 0.5510 0.8864 0.3464 0.042 Uiso 1 1 calc R U . . .
C28 C 0.9104(2) 0.88270(5) 0.48547(9) 0.0343(3) Uani 1 1 d . . . . .
HJ H 0.9395 0.8689 0.5367 0.051 Uiso 1 1 calc R U . . .
HK H 0.9161 0.9193 0.4880 0.051 Uiso 1 1 calc R U . . .
HL H 0.9952 0.8703 0.4566 0.051 Uiso 1 1 calc R U . . .
C27 C 0.5930(2) 0.88412(5) 0.49468(9) 0.0360(4) Uani 1 1 d . . . . .
HM H 0.4723 0.8747 0.4698 0.054 Uiso 1 1 calc R U . . .
HN H 0.6004 0.9206 0.5003 0.054 Uiso 1 1 calc R U . . .
HO H 0.6236 0.8684 0.5446 0.054 Uiso 1 1 calc R U . . .
C44 C 0.9619(2) 0.19678(6) 0.69115(9) 0.0392(4) Uani 1 1 d . . . . .
HP H 0.9104 0.1726 0.6520 0.059 Uiso 1 1 calc R U . . .
HQ H 0.9027 0.1939 0.7337 0.059 Uiso 1 1 calc R U . . .
HR H 1.0884 0.1899 0.7086 0.059 Uiso 1 1 calc R U . . .
O1 O 1.03296(11) 0.63314(3) 0.65496(5) 0.02122(19) Uani 1 1 d . . . . .
O2 O 0.99110(12) 0.46353(3) 0.64519(5) 0.02140(19) Uani 1 1 d . . . . .
O4 O 0.34713(11) 0.48439(3) 0.30147(5) 0.0219(2) Uani 1 1 d . . . . .
O3 O 0.49884(14) 0.64592(3) 0.28475(5) 0.0286(2) Uani 1 1 d . . . . .
O5 O 1.01633(13) 0.28343(4) 0.71840(5) 0.0289(2) Uani 1 1 d . . . . .
O7 O 0.93510(17) 0.34505(4) 0.63587(6) 0.0434(3) Uani 1 1 d . . . . .
C16 C 1.0951(2) 0.36475(6) 0.76083(9) 0.0346(3) Uani 1 1 d . . . . .
H2 H 0.851(2) 0.4064(6) 0.5671(10) 0.032(4) Uiso 1 1 d . . . . .
H1 H 0.928(2) 0.6938(6) 0.5842(10) 0.033(4) Uiso 1 1 d . . . . .
HS H 0.777(3) 0.6409(7) 0.2288(11) 0.047(5) Uiso 1 1 d . . . . .
H16A H 1.071(3) 0.3986(8) 0.7462(11) 0.053(6) Uiso 1 1 d . . . . .
H16B H 1.059(3) 0.3572(8) 0.8105(12) 0.059(6) Uiso 1 1 d . . . . .
 
loop_
 _atom_site_aniso_label
 _atom_site_aniso_U_11
 _atom_site_aniso_U_22
 _atom_site_aniso_U_33
 _atom_site_aniso_U_23
 _atom_site_aniso_U_13
 _atom_site_aniso_U_12
N3 0.0165(5) 0.0176(5) 0.0147(5) -0.0012(4) 0.0021(4) -0.0007(4)
N1 0.0206(5) 0.0149(5) 0.0186(5) -0.0006(4) 0.0024(4) -0.0017(4)
N2 0.0192(5) 0.0139(5) 0.0142(5) -0.0001(4) 0.0014(4) 0.0002(4)
N16 0.0193(5) 0.0164(5) 0.0162(5) 0.0004(4) 0.0009(4) 0.0008(4)
C2 0.0156(5) 0.0172(6) 0.0163(6) -0.0013(4) 0.0058(4) -0.0011(4)
C13 0.0143(5) 0.0173(6) 0.0145(5) -0.0005(4) 0.0056(4) -0.0005(4)
C5 0.0148(5) 0.0162(6) 0.0156(6) -0.0009(4) 0.0054(4) 0.0000(4)
C25 0.0147(5) 0.0169(6) 0.0158(6) -0.0001(4) 0.0062(4) 0.0001(4)
C3 0.0167(5) 0.0170(6) 0.0179(6) -0.0004(5) 0.0069(5) -0.0010(5)
C1 0.0160(5) 0.0164(6) 0.0180(6) -0.0014(5) 0.0068(5) -0.0013(4)
C24 0.0146(5) 0.0165(6) 0.0156(6) -0.0005(4) 0.0068(4) -0.0003(4)
C18 0.0163(5) 0.0170(6) 0.0168(6) -0.0004(5) 0.0068(5) -0.0004(4)
C14 0.0151(5) 0.0166(6) 0.0149(5) -0.0005(4) 0.0062(4) 0.0000(4)
C19 0.0164(5) 0.0172(6) 0.0171(6) 0.0009(5) 0.0064(4) 0.0002(4)
C17 0.0221(6) 0.0166(6) 0.0181(6) 0.0002(5) 0.0055(5) 0.0008(5)
C9 0.0187(6) 0.0163(6) 0.0183(6) -0.0009(5) 0.0073(5) -0.0027(4)
C20 0.0179(6) 0.0161(6) 0.0189(6) -0.0011(5) 0.0078(5) -0.0013(5)
C12 0.0166(5) 0.0164(6) 0.0159(5) 0.0002(4) 0.0065(4) -0.0003(4)
C6 0.0153(5) 0.0160(6) 0.0149(5) -0.0002(4) 0.0058(4) 0.0003(4)
C37 0.0212(6) 0.0183(6) 0.0189(6) 0.0024(5) -0.0024(5) 0.0011(5)
C41 0.0198(6) 0.0170(6) 0.0210(6) -0.0019(5) 0.0067(5) -0.0025(5)
C15 0.0159(5) 0.0168(6) 0.0178(6) -0.0001(5) 0.0051(5) 0.0012(5)
C34 0.0160(6) 0.0202(6) 0.0170(6) -0.0012(5) 0.0002(5) -0.0007(5)
C43 0.0345(7) 0.0306(7) 0.0258(7) 0.0025(6) 0.0101(6) 0.0027(6)
C4 0.0161(5) 0.0166(6) 0.0160(6) -0.0011(5) 0.0052(4) 0.0004(4)
C7 0.0158(5) 0.0175(6) 0.0146(5) -0.0014(4) 0.0053(4) -0.0018(4)
C8 0.0190(6) 0.0161(6) 0.0162(6) 0.0008(4) 0.0050(4) -0.0003(5)
C40 0.0176(6) 0.0172(6) 0.0191(6) 0.0007(5) 0.0077(5) -0.0003(5)
C22 0.0257(6) 0.0184(6) 0.0210(6) 0.0029(5) 0.0064(5) 0.0020(5)
C38 0.0273(7) 0.0261(7) 0.0185(6) 0.0007(5) 0.0014(5) -0.0008(5)
C42 0.0262(7) 0.0306(7) 0.0279(7) 0.0077(6) 0.0061(6) 0.0067(6)
C32 0.0249(6) 0.0193(6) 0.0234(6) -0.0030(5) 0.0068(5) -0.0047(5)
C33 0.0243(6) 0.0214(6) 0.0262(7) -0.0061(5) 0.0085(5) -0.0039(5)
C11 0.0211(6) 0.0190(6) 0.0156(6) 0.0004(5) 0.0019(5) -0.0003(5)
C10 0.0230(6) 0.0198(6) 0.0163(6) -0.0029(5) 0.0020(5) -0.0029(5)
C39 0.0401(8) 0.0360(8) 0.0193(7) 0.0001(6) -0.0015(6) -0.0049(6)
C23 0.0214(6) 0.0157(6) 0.0239(6) 0.0009(5) 0.0113(5) -0.0004(5)
C26 0.0287(7) 0.0144(6) 0.0270(7) 0.0006(5) 0.0092(5) -0.0003(5)
C36 0.0282(7) 0.0620(10) 0.0184(7) -0.0016(7) 0.0032(6) 0.0026(7)
C31 0.0294(7) 0.0151(6) 0.0239(7) -0.0008(5) 0.0041(5) -0.0009(5)
C30 0.0220(6) 0.0153(6) 0.0193(6) -0.0025(5) 0.0055(5) -0.0026(5)
C35 0.0198(6) 0.0257(7) 0.0186(6) -0.0008(5) 0.0034(5) -0.0007(5)
C21 0.0230(6) 0.0189(6) 0.0185(6) 0.0002(5) 0.0052(5) -0.0002(5)
C29 0.0373(8) 0.0166(6) 0.0321(7) 0.0040(5) 0.0096(6) 0.0001(5)
C28 0.0392(8) 0.0171(6) 0.0431(9) 0.0018(6) 0.0012(7) -0.0065(6)
C27 0.0540(10) 0.0189(7) 0.0425(9) -0.0014(6) 0.0267(7) 0.0021(6)
C44 0.0557(10) 0.0304(8) 0.0364(8) 0.0037(6) 0.0208(7) 0.0098(7)
O1 0.0243(4) 0.0184(4) 0.0196(4) -0.0029(3) 0.0015(3) -0.0042(3)
O2 0.0250(4) 0.0174(4) 0.0195(4) 0.0009(3) -0.0005(3) 0.0017(3)
O4 0.0207(4) 0.0188(4) 0.0229(4) 0.0008(3) -0.0029(3) -0.0026(3)
O3 0.0454(6) 0.0175(5) 0.0193(4) 0.0031(4) -0.0010(4) -0.0041(4)
O5 0.0330(5) 0.0289(5) 0.0253(5) 0.0079(4) 0.0075(4) 0.0079(4)
O7 0.0588(7) 0.0293(6) 0.0334(6) 0.0091(5) -0.0100(5) -0.0002(5)
C16 0.0347(8) 0.0325(8) 0.0352(8) 0.0048(6) 0.0040(6) 0.0076(6)
 
_geom_special_details
;
 All esds (except the esd in the dihedral angle between two l.s. planes)
 are estimated using the full covariance matrix.  The cell esds are taken
 into account individually in the estimation of esds in distances, angles
 and torsion angles; correlations between esds in cell parameters are only
 used when they are defined by crystal symmetry.  An approximate (isotropic)
 treatment of cell esds is used for estimating esds involving l.s. planes.
;
 
loop_
 _geom_bond_atom_site_label_1
 _geom_bond_atom_site_label_2
 _geom_bond_distance
 _geom_bond_site_symmetry_2
 _geom_bond_publ_flag
N3 C3 1.3950(15) . ?
N3 C4 1.3979(15) . ?
N3 C34 1.4715(15) . ?
N1 C1 1.3605(16) . ?
N1 C40 1.3839(16) . ?
N1 H1 0.880(18) . ?
N2 C6 1.3572(15) . ?
N2 C7 1.3904(15) . ?
N2 H2 0.889(18) . ?
N16 C17 1.3882(16) . ?
N16 C15 1.3930(15) . ?
N16 C37 1.4716(15) . ?
C2 C1 1.3892(17) . ?
C2 C24 1.4099(16) . ?
C2 C3 1.4627(17) . ?
C13 C14 1.4011(16) . ?
C13 C6 1.4451(16) . ?
C13 C12 1.4598(16) . ?
C5 C6 1.3948(16) . ?
C5 C24 1.4129(16) . ?
C5 C4 1.4646(16) . ?
C25 C14 1.4254(16) . ?
C25 C24 1.4271(17) . ?
C25 C18 1.4280(17) . ?
C3 O1 1.2273(15) . ?
C1 C19 1.4356(17) . ?
C18 C19 1.3974(17) . ?
C18 C17 1.4759(17) . ?
C14 C15 1.4719(16) . ?
C19 C20 1.4627(17) . ?
C17 O3 1.2191(15) . ?
C9 C8 1.3939(17) . ?
C9 C10 1.4103(17) . ?
C9 C30 1.5349(16) . ?
C20 C21 1.4033(17) . ?
C20 C40 1.4119(17) . ?
C12 C11 1.4075(17) . ?
C12 C7 1.4082(16) . ?
C37 C38 1.5220(18) . ?
C37 H37A 0.9900 . ?
C37 H37B 0.9900 . ?
C41 C40 1.3921(17) . ?
C41 C23 1.3935(18) . ?
C41 H41 0.9500 . ?
C15 O4 1.2183(15) . ?
C34 C35 1.5231(17) . ?
C34 H 0.9900 . ?
C34 HA 0.9900 . ?
C43 O5 1.4511(18) . ?
C43 C44 1.500(2) . ?
C43 H43A 0.9900 . ?
C43 H43B 0.9900 . ?
C4 O2 1.2278(15) . ?
C7 C8 1.3944(17) . ?
C8 H8 0.9500 . ?
C22 C21 1.3854(18) . ?
C22 C23 1.4047(18) . ?
C22 HB 0.9500 . ?
C38 C39 1.5231(18) . ?
C38 H38A 0.9900 . ?
C38 H38B 0.9900 . ?
C42 O7 1.2091(17) . ?
C42 O5 1.3309(17) . ?
C42 C16 1.487(2) . ?
C32 C30 1.5366(17) . ?
C32 H32A 0.9800 . ?
C32 H32B 0.9800 . ?
C32 HC 0.9800 . ?
C33 C30 1.5391(17) . ?
C33 H33A 0.9800 . ?
C33 H33B 0.9800 . ?
C33 HD 0.9800 . ?
C11 C10 1.3775(18) . ?
C11 H11 0.9500 . ?
C10 H10 0.9500 . ?
C39 H39A 0.9800 . ?
C39 H39B 0.9800 . ?
C39 H39C 0.9800 . ?
C23 C26 1.5364(16) . ?
C26 C28 1.534(2) . ?
C26 C29 1.5373(18) . ?
C26 C27 1.5375(19) . ?
C36 C35 1.5160(18) . ?
C36 HE 0.9800 . ?
C36 H36 0.9800 . ?
C36 HF 0.9800 . ?
C31 C30 1.5327(17) . ?
C31 H31A 0.9800 . ?
C31 H31B 0.9800 . ?
C31 H31C 0.9800 . ?
C35 H35A 0.9900 . ?
C35 H35B 0.9900 . ?
C21 H21 0.9500 . ?
C29 HG 0.9800 . ?
C29 HH 0.9800 . ?
C29 HI 0.9800 . ?
C28 HJ 0.9800 . ?
C28 HK 0.9800 . ?
C28 HL 0.9800 . ?
C27 HM 0.9800 . ?
C27 HN 0.9800 . ?
C27 HO 0.9800 . ?
C44 HP 0.9800 . ?
C44 HQ 0.9800 . ?
C44 HR 0.9800 . ?
C16 H16A 0.95(2) . ?
C16 H16B 1.02(2) . ?
 
loop_
 _geom_angle_atom_site_label_1
 _geom_angle_atom_site_label_2
 _geom_angle_atom_site_label_3
 _geom_angle
 _geom_angle_site_symmetry_1
 _geom_angle_site_symmetry_3
 _geom_angle_publ_flag
C3 N3 C4 124.13(10) . . ?
C3 N3 C34 117.86(10) . . ?
C4 N3 C34 117.87(10) . . ?
C1 N1 C40 109.57(10) . . ?
C1 N1 H1 121.0(11) . . ?
C40 N1 H1 129.4(11) . . ?
C6 N2 C7 109.33(10) . . ?
C6 N2 H2 124.6(11) . . ?
C7 N2 H2 126.0(11) . . ?
C17 N16 C15 124.92(10) . . ?
C17 N16 C37 118.37(10) . . ?
C15 N16 C37 116.64(10) . . ?
C1 C2 C24 118.29(11) . . ?
C1 C2 C3 120.16(11) . . ?
C24 C2 C3 121.55(11) . . ?
C14 C13 C6 118.08(10) . . ?
C14 C13 C12 136.49(11) . . ?
C6 C13 C12 105.36(10) . . ?
C6 C5 C24 118.59(11) . . ?
C6 C5 C4 120.44(11) . . ?
C24 C5 C4 120.95(10) . . ?
C14 C25 C24 119.49(11) . . ?
C14 C25 C18 120.66(11) . . ?
C24 C25 C18 119.85(11) . . ?
O1 C3 N3 120.09(11) . . ?
O1 C3 C2 123.01(11) . . ?
N3 C3 C2 116.91(10) . . ?
N1 C1 C2 127.28(11) . . ?
N1 C1 C19 109.49(10) . . ?
C2 C1 C19 123.21(11) . . ?
C2 C24 C5 118.91(11) . . ?
C2 C24 C25 120.35(11) . . ?
C5 C24 C25 120.73(11) . . ?
C19 C18 C25 120.27(11) . . ?
C19 C18 C17 120.64(11) . . ?
C25 C18 C17 118.97(11) . . ?
C13 C14 C25 120.68(11) . . ?
C13 C14 C15 120.45(10) . . ?
C25 C14 C15 118.85(10) . . ?
C18 C19 C1 117.88(11) . . ?
C18 C19 C20 136.85(11) . . ?
C1 C19 C20 105.27(10) . . ?
O3 C17 N16 119.40(11) . . ?
O3 C17 C18 123.42(11) . . ?
N16 C17 C18 117.16(10) . . ?
C8 C9 C10 118.08(11) . . ?
C8 C9 C30 122.43(11) . . ?
C10 C9 C30 119.38(11) . . ?
C21 C20 C40 116.87(11) . . ?
C21 C20 C19 136.58(11) . . ?
C40 C20 C19 106.51(10) . . ?
C11 C12 C7 116.94(11) . . ?
C11 C12 C13 136.51(11) . . ?
C7 C12 C13 106.44(10) . . ?
N2 C6 C5 128.31(11) . . ?
N2 C6 C13 109.34(10) . . ?
C5 C6 C13 122.33(11) . . ?
N16 C37 C38 111.25(10) . . ?
N16 C37 H37A 109.4 . . ?
C38 C37 H37A 109.4 . . ?
N16 C37 H37B 109.4 . . ?
C38 C37 H37B 109.4 . . ?
H37A C37 H37B 108.0 . . ?
C40 C41 C23 119.18(11) . . ?
C40 C41 H41 120.4 . . ?
C23 C41 H41 120.4 . . ?
O4 C15 N16 118.83(11) . . ?
O4 C15 C14 123.71(11) . . ?
N16 C15 C14 117.46(10) . . ?
N3 C34 C35 112.19(10) . . ?
N3 C34 H 109.2 . . ?
C35 C34 H 109.2 . . ?
N3 C34 HA 109.2 . . ?
C35 C34 HA 109.2 . . ?
H C34 HA 107.9 . . ?
O5 C43 C44 107.99(12) . . ?
O5 C43 H43A 110.1 . . ?
C44 C43 H43A 110.1 . . ?
O5 C43 H43B 110.1 . . ?
C44 C43 H43B 110.1 . . ?
H43A C43 H43B 108.4 . . ?
O2 C4 N3 120.11(10) . . ?
O2 C4 C5 122.56(11) . . ?
N3 C4 C5 117.32(10) . . ?
N2 C7 C8 126.83(11) . . ?
N2 C7 C12 109.48(10) . . ?
C8 C7 C12 123.63(11) . . ?
C9 C8 C7 118.63(11) . . ?
C9 C8 H8 120.7 . . ?
C7 C8 H8 120.7 . . ?
N1 C40 C41 127.60(11) . . ?
N1 C40 C20 109.15(10) . . ?
C41 C40 C20 123.24(11) . . ?
C21 C22 C23 122.82(12) . . ?
C21 C22 HB 118.6 . . ?
C23 C22 HB 118.6 . . ?
C37 C38 C39 111.71(11) . . ?
C37 C38 H38A 109.3 . . ?
C39 C38 H38A 109.3 . . ?
C37 C38 H38B 109.3 . . ?
C39 C38 H38B 109.3 . . ?
H38A C38 H38B 107.9 . . ?
O7 C42 O5 122.24(14) . . ?
O7 C42 C16 125.34(14) . . ?
O5 C42 C16 112.41(12) . . ?
C30 C32 H32A 109.5 . . ?
C30 C32 H32B 109.5 . . ?
H32A C32 H32B 109.5 . . ?
C30 C32 HC 109.5 . . ?
H32A C32 HC 109.5 . . ?
H32B C32 HC 109.5 . . ?
C30 C33 H33A 109.5 . . ?
C30 C33 H33B 109.5 . . ?
H33A C33 H33B 109.5 . . ?
C30 C33 HD 109.5 . . ?
H33A C33 HD 109.5 . . ?
H33B C33 HD 109.5 . . ?
C10 C11 C12 119.58(11) . . ?
C10 C11 H11 120.2 . . ?
C12 C11 H11 120.2 . . ?
C11 C10 C9 123.09(11) . . ?
C11 C10 H10 118.5 . . ?
C9 C10 H10 118.5 . . ?
C38 C39 H39A 109.5 . . ?
C38 C39 H39B 109.5 . . ?
H39A C39 H39B 109.5 . . ?
C38 C39 H39C 109.5 . . ?
H39A C39 H39C 109.5 . . ?
H39B C39 H39C 109.5 . . ?
C41 C23 C22 118.00(11) . . ?
C41 C23 C26 120.53(11) . . ?
C22 C23 C26 121.39(11) . . ?
C28 C26 C23 111.27(11) . . ?
C28 C26 C29 107.95(11) . . ?
C23 C26 C29 111.81(11) . . ?
C28 C26 C27 108.68(12) . . ?
C23 C26 C27 108.51(10) . . ?
C29 C26 C27 108.55(11) . . ?
C35 C36 HE 109.5 . . ?
C35 C36 H36 109.5 . . ?
HE C36 H36 109.5 . . ?
C35 C36 HF 109.5 . . ?
HE C36 HF 109.5 . . ?
H36 C36 HF 109.5 . . ?
C30 C31 H31A 109.5 . . ?
C30 C31 H31B 109.5 . . ?
H31A C31 H31B 109.5 . . ?
C30 C31 H31C 109.5 . . ?
H31A C31 H31C 109.5 . . ?
H31B C31 H31C 109.5 . . ?
C31 C30 C9 111.86(10) . . ?
C31 C30 C32 108.66(10) . . ?
C9 C30 C32 111.31(10) . . ?
C31 C30 C33 108.92(10) . . ?
C9 C30 C33 108.34(10) . . ?
C32 C30 C33 107.64(10) . . ?
C36 C35 C34 111.97(11) . . ?
C36 C35 H35A 109.2 . . ?
C34 C35 H35A 109.2 . . ?
C36 C35 H35B 109.2 . . ?
C34 C35 H35B 109.2 . . ?
H35A C35 H35B 107.9 . . ?
C22 C21 C20 119.86(12) . . ?
C22 C21 H21 120.1 . . ?
C20 C21 H21 120.1 . . ?
C26 C29 HG 109.5 . . ?
C26 C29 HH 109.5 . . ?
HG C29 HH 109.5 . . ?
C26 C29 HI 109.5 . . ?
HG C29 HI 109.5 . . ?
HH C29 HI 109.5 . . ?
C26 C28 HJ 109.5 . . ?
C26 C28 HK 109.5 . . ?
HJ C28 HK 109.5 . . ?
C26 C28 HL 109.5 . . ?
HJ C28 HL 109.5 . . ?
HK C28 HL 109.5 . . ?
C26 C27 HM 109.5 . . ?
C26 C27 HN 109.5 . . ?
HM C27 HN 109.5 . . ?
C26 C27 HO 109.5 . . ?
HM C27 HO 109.5 . . ?
HN C27 HO 109.5 . . ?
C43 C44 HP 109.5 . . ?
C43 C44 HQ 109.5 . . ?
HP C44 HQ 109.5 . . ?
C43 C44 HR 109.5 . . ?
HP C44 HR 109.5 . . ?
HQ C44 HR 109.5 . . ?
C42 O5 C43 115.21(11) . . ?
C42 C16 H16A 109.1(12) . . ?
C42 C16 H16B 112.7(12) . . ?
H16A C16 H16B 111.0(17) . . ?
 
loop_
 _geom_torsion_atom_site_label_1
 _geom_torsion_atom_site_label_2
 _geom_torsion_atom_site_label_3
 _geom_torsion_atom_site_label_4
 _geom_torsion
 _geom_torsion_site_symmetry_1
 _geom_torsion_site_symmetry_2
 _geom_torsion_site_symmetry_3
 _geom_torsion_site_symmetry_4
 _geom_torsion_publ_flag
C4 N3 C3 O1 174.69(11) . . . . ?
C34 N3 C3 O1 -0.86(16) . . . . ?
C4 N3 C3 C2 -5.93(16) . . . . ?
C34 N3 C3 C2 178.53(10) . . . . ?
C1 C2 C3 O1 2.74(18) . . . . ?
C24 C2 C3 O1 -177.11(11) . . . . ?
C1 C2 C3 N3 -176.62(10) . . . . ?
C24 C2 C3 N3 3.53(16) . . . . ?
C40 N1 C1 C2 179.02(11) . . . . ?
C40 N1 C1 C19 0.51(13) . . . . ?
C24 C2 C1 N1 179.34(11) . . . . ?
C3 C2 C1 N1 -0.52(18) . . . . ?
C24 C2 C1 C19 -2.34(17) . . . . ?
C3 C2 C1 C19 177.80(10) . . . . ?
C1 C2 C24 C5 -179.94(10) . . . . ?
C3 C2 C24 C5 -0.09(16) . . . . ?
C1 C2 C24 C25 0.22(16) . . . . ?
C3 C2 C24 C25 -179.93(10) . . . . ?
C6 C5 C24 C2 179.95(10) . . . . ?
C4 C5 C24 C2 -1.30(16) . . . . ?
C6 C5 C24 C25 -0.21(16) . . . . ?
C4 C5 C24 C25 178.54(10) . . . . ?
C14 C25 C24 C2 -177.80(10) . . . . ?
C18 C25 C24 C2 3.07(16) . . . . ?
C14 C25 C24 C5 2.36(16) . . . . ?
C18 C25 C24 C5 -176.77(10) . . . . ?
C14 C25 C18 C19 176.53(10) . . . . ?
C24 C25 C18 C19 -4.35(17) . . . . ?
C14 C25 C18 C17 -7.52(16) . . . . ?
C24 C25 C18 C17 171.61(10) . . . . ?
C6 C13 C14 C25 2.55(16) . . . . ?
C12 C13 C14 C25 -173.91(12) . . . . ?
C6 C13 C14 C15 -176.39(10) . . . . ?
C12 C13 C14 C15 7.1(2) . . . . ?
C24 C25 C14 C13 -3.57(16) . . . . ?
C18 C25 C14 C13 175.56(10) . . . . ?
C24 C25 C14 C15 175.39(10) . . . . ?
C18 C25 C14 C15 -5.48(16) . . . . ?
C25 C18 C19 C1 2.29(16) . . . . ?
C17 C18 C19 C1 -173.59(10) . . . . ?
C25 C18 C19 C20 -177.12(12) . . . . ?
C17 C18 C19 C20 7.0(2) . . . . ?
N1 C1 C19 C18 179.67(10) . . . . ?
C2 C1 C19 C18 1.09(17) . . . . ?
N1 C1 C19 C20 -0.74(13) . . . . ?
C2 C1 C19 C20 -179.32(10) . . . . ?
C15 N16 C17 O3 172.75(11) . . . . ?
C37 N16 C17 O3 -4.12(17) . . . . ?
C15 N16 C17 C18 -5.79(17) . . . . ?
C37 N16 C17 C18 177.34(10) . . . . ?
C19 C18 C17 O3 10.60(18) . . . . ?
C25 C18 C17 O3 -165.33(12) . . . . ?
C19 C18 C17 N16 -170.92(10) . . . . ?
C25 C18 C17 N16 13.15(16) . . . . ?
C18 C19 C20 C21 2.6(2) . . . . ?
C1 C19 C20 C21 -176.85(13) . . . . ?
C18 C19 C20 C40 -179.85(13) . . . . ?
C1 C19 C20 C40 0.69(12) . . . . ?
C14 C13 C12 C11 1.3(2) . . . . ?
C6 C13 C12 C11 -175.47(13) . . . . ?
C14 C13 C12 C7 177.10(12) . . . . ?
C6 C13 C12 C7 0.34(12) . . . . ?
C7 N2 C6 C5 -176.30(11) . . . . ?
C7 N2 C6 C13 2.42(13) . . . . ?
C24 C5 C6 N2 177.76(11) . . . . ?
C4 C5 C6 N2 -1.00(18) . . . . ?
C24 C5 C6 C13 -0.81(16) . . . . ?
C4 C5 C6 C13 -179.57(10) . . . . ?
C14 C13 C6 N2 -179.17(10) . . . . ?
C12 C13 C6 N2 -1.69(12) . . . . ?
C14 C13 C6 C5 -0.35(16) . . . . ?
C12 C13 C6 C5 177.12(10) . . . . ?
C17 N16 C37 C38 100.23(13) . . . . ?
C15 N16 C37 C38 -76.90(13) . . . . ?
C17 N16 C15 O4 173.77(11) . . . . ?
C37 N16 C15 O4 -9.31(16) . . . . ?
C17 N16 C15 C14 -7.08(17) . . . . ?
C37 N16 C15 C14 169.84(10) . . . . ?
C13 C14 C15 O4 10.82(17) . . . . ?
C25 C14 C15 O4 -168.14(11) . . . . ?
C13 C14 C15 N16 -168.29(10) . . . . ?
C25 C14 C15 N16 12.75(15) . . . . ?
C3 N3 C34 C35 84.65(13) . . . . ?
C4 N3 C34 C35 -91.18(12) . . . . ?
C3 N3 C4 O2 -176.10(11) . . . . ?
C34 N3 C4 O2 -0.56(16) . . . . ?
C3 N3 C4 C5 4.63(16) . . . . ?
C34 N3 C4 C5 -179.83(10) . . . . ?
C6 C5 C4 O2 -1.32(17) . . . . ?
C24 C5 C4 O2 179.96(11) . . . . ?
C6 C5 C4 N3 177.93(10) . . . . ?
C24 C5 C4 N3 -0.80(16) . . . . ?
C6 N2 C7 C8 174.82(11) . . . . ?
C6 N2 C7 C12 -2.21(13) . . . . ?
C11 C12 C7 N2 177.86(10) . . . . ?
C13 C12 C7 N2 1.09(12) . . . . ?
C11 C12 C7 C8 0.71(17) . . . . ?
C13 C12 C7 C8 -176.05(10) . . . . ?
C10 C9 C8 C7 -2.32(16) . . . . ?
C30 C9 C8 C7 173.76(10) . . . . ?
N2 C7 C8 C9 -175.22(11) . . . . ?
C12 C7 C8 C9 1.42(17) . . . . ?
C1 N1 C40 C41 179.47(11) . . . . ?
C1 N1 C40 C20 -0.05(13) . . . . ?
C23 C41 C40 N1 -178.05(11) . . . . ?
C23 C41 C40 C20 1.41(18) . . . . ?
C21 C20 C40 N1 177.69(10) . . . . ?
C19 C20 C40 N1 -0.41(13) . . . . ?
C21 C20 C40 C41 -1.86(17) . . . . ?
C19 C20 C40 C41 -179.96(11) . . . . ?
N16 C37 C38 C39 175.24(11) . . . . ?
C7 C12 C11 C10 -1.87(17) . . . . ?
C13 C12 C11 C10 173.63(12) . . . . ?
C12 C11 C10 C9 0.95(19) . . . . ?
C8 C9 C10 C11 1.21(18) . . . . ?
C30 C9 C10 C11 -175.00(11) . . . . ?
C40 C41 C23 C22 0.08(17) . . . . ?
C40 C41 C23 C26 176.98(11) . . . . ?
C21 C22 C23 C41 -1.09(18) . . . . ?
C21 C22 C23 C26 -177.95(11) . . . . ?
C41 C23 C26 C28 37.11(16) . . . . ?
C22 C23 C26 C28 -146.11(12) . . . . ?
C41 C23 C26 C29 157.90(11) . . . . ?
C22 C23 C26 C29 -25.31(16) . . . . ?
C41 C23 C26 C27 -82.41(15) . . . . ?
C22 C23 C26 C27 94.37(14) . . . . ?
C8 C9 C30 C31 18.94(16) . . . . ?
C10 C9 C30 C31 -165.03(11) . . . . ?
C8 C9 C30 C32 140.71(11) . . . . ?
C10 C9 C30 C32 -43.25(15) . . . . ?
C8 C9 C30 C33 -101.13(13) . . . . ?
C10 C9 C30 C33 74.91(14) . . . . ?
N3 C34 C35 C36 171.29(11) . . . . ?
C23 C22 C21 C20 0.62(19) . . . . ?
C40 C20 C21 C22 0.82(17) . . . . ?
C19 C20 C21 C22 178.17(13) . . . . ?
O7 C42 O5 C43 0.79(19) . . . . ?
C16 C42 O5 C43 -178.06(11) . . . . ?
C44 C43 O5 C42 179.49(12) . . . . ?
 
_refine_diff_density_max    0.356
_refine_diff_density_min   -0.275
_refine_diff_density_rms    0.056

_shelxl_version_number 2013-4

_shelx_res_file
;
TITL SAS520B2B in P2(1)/c
CELL 1.54178 7.7338 26.7364 18.136 90 102.266 90
ZERR 4 0.0002 0.0007 0.0005 0 0.001 0
LATT 1
SYMM -X,0.5+Y,0.5-Z

SFAC C H N O
UNIT 176 192 16 24

L.S. 12
PLAN  20
TEMP -173.15
BOND  $H
MORE -1
fmap -2
acta
TEMP    -173
CONF
HTAB  2.5

WGHT    0.047400    1.695500
FVAR       0.08938
N3    3    1.020682    0.548279    0.647816    11.00000    0.01651    0.01756 =
         0.01475   -0.00119    0.00210   -0.00068
N1    3    0.855245    0.690426    0.539934    11.00000    0.02059    0.01486 =
         0.01861   -0.00060    0.00238   -0.00165
N2    3    0.777611    0.416421    0.525039    11.00000    0.01921    0.01386 =
         0.01423   -0.00012    0.00143    0.00016
N16   3    0.423677    0.565147    0.294365    11.00000    0.01934    0.01645 =
         0.01621    0.00042    0.00089    0.00082
C2    1    0.847810    0.598418    0.546227    11.00000    0.01563    0.01722 =
         0.01630   -0.00132    0.00580   -0.00112
C13   1    0.622352    0.467056    0.432599    11.00000    0.01429    0.01730 =
         0.01449   -0.00054    0.00564   -0.00054
C5    1    0.820806    0.507820    0.542061    11.00000    0.01479    0.01616 =
         0.01561   -0.00092    0.00538   -0.00005
C25   1    0.653338    0.558498    0.437027    11.00000    0.01475    0.01692 =
         0.01577   -0.00015    0.00623    0.00009
C3    1    0.971612    0.595861    0.619324    11.00000    0.01668    0.01704 =
         0.01792   -0.00037    0.00689   -0.00104
C1    1    0.800134    0.644448    0.512444    11.00000    0.01597    0.01638 =
         0.01800   -0.00141    0.00678   -0.00131
C24   1    0.773652    0.554894    0.508342    11.00000    0.01458    0.01650 =
         0.01565   -0.00054    0.00678   -0.00029
C18   1    0.614465    0.606228    0.402097    11.00000    0.01625    0.01705 =
         0.01681   -0.00043    0.00679   -0.00042
C14   1    0.574996    0.514184    0.400890    11.00000    0.01511    0.01658 =
         0.01486   -0.00054    0.00618    0.00003
C19   1    0.684264    0.649728    0.439705    11.00000    0.01643    0.01718 =
         0.01706    0.00094    0.00644    0.00021
C17   1    0.509750    0.608557    0.324004    11.00000    0.02206    0.01662 =
         0.01810    0.00017    0.00552    0.00082
C9    1    0.598370    0.308970    0.402073    11.00000    0.01875    0.01628 =
         0.01833   -0.00095    0.00730   -0.00273
C20   1    0.671599    0.703605    0.425579    11.00000    0.01787    0.01606 =
         0.01889   -0.00113    0.00783   -0.00132
C12   1    0.584510    0.415018    0.410603    11.00000    0.01657    0.01639 =
         0.01589    0.00021    0.00646   -0.00035
C6    1    0.746817    0.464927    0.504288    11.00000    0.01529    0.01603 =
         0.01489   -0.00017    0.00583    0.00031
C37   1    0.311912    0.566941    0.217846    11.00000    0.02124    0.01831 =
         0.01889    0.00243   -0.00243    0.00107
AFIX  23
H37A  2    0.278237    0.602045    0.204559    11.00000   -1.20000
H37B  2    0.202139    0.547638    0.216713    11.00000   -1.20000
AFIX   0
C41   1    0.801319    0.778400    0.495847    11.00000    0.01979    0.01703 =
         0.02104   -0.00191    0.00673   -0.00245
AFIX  43
H41   2    0.877631    0.792380    0.538926    11.00000   -1.20000
AFIX   0
C15   1    0.440996    0.518791    0.330245    11.00000    0.01594    0.01680 =
         0.01780   -0.00005    0.00510    0.00118
C34   1    1.148489    0.544791    0.720389    11.00000    0.01596    0.02017 =
         0.01701   -0.00115    0.00024   -0.00066
AFIX  23
H     2    1.236745    0.571953    0.723493    11.00000   -1.20000
HA    2    1.212109    0.512501    0.722836    11.00000   -1.20000
AFIX   0

C43   1    0.937412    0.248698    0.659299    11.00000    0.03453    0.03063 =
         0.02575    0.00249    0.01011    0.00274
AFIX  23
H43A  2    0.995375    0.251830    0.615816    11.00000   -1.20000
H43B  2    0.809848    0.256083    0.641761    11.00000   -1.20000
AFIX   0

C4    1    0.947432    0.503843    0.614386    11.00000    0.01610    0.01659 =
         0.01596   -0.00115    0.00519    0.00038
C7    1    0.684390    0.385522    0.468702    11.00000    0.01584    0.01745 =
         0.01457   -0.00139    0.00528   -0.00182
C8    1    0.691670    0.333453    0.466139    11.00000    0.01901    0.01610 =
         0.01625    0.00075    0.00496   -0.00031
AFIX  43
H8    2    0.758835    0.315046    0.507212    11.00000   -1.20000
AFIX   0
C40   1    0.779867    0.726804    0.488830    11.00000    0.01757    0.01723 =
         0.01905    0.00074    0.00766   -0.00026
C22   1    0.598268    0.786615    0.376522    11.00000    0.02569    0.01836 =
         0.02104    0.00292    0.00645    0.00200
AFIX  43
HB    2    0.533528    0.807404    0.337843    11.00000   -1.20000
AFIX   0
C38   1    0.408182    0.545460    0.160001    11.00000    0.02732    0.02608 =
         0.01853    0.00072    0.00137   -0.00079
AFIX  23
H38A  2    0.450848    0.511392    0.175753    11.00000   -1.20000
H38B  2    0.512552    0.566493    0.158194    11.00000   -1.20000
AFIX   0

C42   1    1.006515    0.331429    0.698513    11.00000    0.02620    0.03063 =
         0.02790    0.00771    0.00612    0.00668
C32   1    0.432375    0.229524    0.354588    11.00000    0.02485    0.01928 =
         0.02343   -0.00304    0.00676   -0.00472
AFIX 137
H32A  2    0.390837    0.243535    0.303988    11.00000   -1.50000
H32B  2    0.346933    0.237304    0.385843    11.00000   -1.50000
HC    2    0.444225    0.193162    0.350977    11.00000   -1.50000
AFIX   0
C33   1    0.737776    0.243409    0.336169    11.00000    0.02434    0.02143 =
         0.02615   -0.00612    0.00849   -0.00392
AFIX 137
H33A  2    0.856211    0.255868    0.359021    11.00000   -1.50000
H33B  2    0.692673    0.261145    0.288689    11.00000   -1.50000
HD    2    0.743957    0.207506    0.326151    11.00000   -1.50000
AFIX   0
C11   1    0.486341    0.389552    0.347484    11.00000    0.02112    0.01897 =
         0.01558    0.00040    0.00194   -0.00031
AFIX  43
H11   2    0.414037    0.407679    0.307439    11.00000   -1.20000
AFIX   0
C10   1    0.495769    0.338176    0.344142    11.00000    0.02297    0.01975 =
         0.01629   -0.00292    0.00204   -0.00287
AFIX  43
H10   2    0.430063    0.321641    0.300773    11.00000   -1.20000
AFIX   0
C39   1    0.288663    0.543099    0.081644    11.00000    0.04013    0.03599 =
         0.01928    0.00013   -0.00149   -0.00490
AFIX 137
H39A  2    0.183024    0.523341    0.083639    11.00000   -1.50000
H39B  2    0.352704    0.527396    0.046558    11.00000   -1.50000
H39C  2    0.253357    0.577042    0.064317    11.00000   -1.50000
AFIX   0
C23   1    0.709462    0.809291    0.438893    11.00000    0.02137    0.01567 =
         0.02388    0.00091    0.01133   -0.00038
C26   1    0.722929    0.866461    0.446622    11.00000    0.02869    0.01444 =
         0.02699    0.00055    0.00921   -0.00030
C36   1    1.186393    0.537196    0.861365    11.00000    0.02817    0.06201 =
         0.01842   -0.00161    0.00316    0.00258
AFIX 137
HE    2    1.125501    0.541395    0.903154    11.00000   -1.50000
H36   2    1.287393    0.560126    0.868091    11.00000   -1.50000
HF    2    1.228421    0.502655    0.860656    11.00000   -1.50000
AFIX   0
C31   1    0.686615    0.225176    0.465020    11.00000    0.02944    0.01506 =
         0.02391   -0.00078    0.00408   -0.00092
AFIX 137
H31A  2    0.806693    0.237150    0.486127    11.00000   -1.50000
H31B  2    0.689642    0.189111    0.455729    11.00000   -1.50000
H31C  2    0.610641    0.231878    0.500799    11.00000   -1.50000
AFIX   0
C30   1    0.612901    0.252372    0.390581    11.00000    0.02197    0.01532 =
         0.01931   -0.00253    0.00549   -0.00257
C35   1    1.059335    0.548658    0.787415    11.00000    0.01975    0.02573 =
         0.01864   -0.00084    0.00343   -0.00069
AFIX  23
H35A  2    1.011660    0.582870    0.789535    11.00000   -1.20000
H35B  2    0.958783    0.524964    0.780325    11.00000   -1.20000
AFIX   0
C21   1    0.578960    0.735236    0.368994    11.00000    0.02302    0.01891 =
         0.01851    0.00022    0.00518   -0.00023
AFIX  43
H21   2    0.503165    0.721447    0.325616    11.00000   -1.20000
AFIX   0
C29   1    0.675586    0.892637    0.369484    11.00000    0.03727    0.01661 =
         0.03209    0.00398    0.00959    0.00008
AFIX 137
HG    2    0.750478    0.879523    0.336617    11.00000   -1.50000
HH    2    0.695100    0.928714    0.376264    11.00000   -1.50000
HI    2    0.551003    0.886362    0.346396    11.00000   -1.50000
AFIX   0
C28   1    0.910359    0.882702    0.485467    11.00000    0.03924    0.01713 =
         0.04313    0.00179    0.00122   -0.00647
AFIX 137
HJ    2    0.939540    0.868878    0.536657    11.00000   -1.50000
HK    2    0.916136    0.919295    0.487985    11.00000   -1.50000
HL    2    0.995168    0.870311    0.456581    11.00000   -1.50000
AFIX   0
C27   1    0.593031    0.884123    0.494678    11.00000    0.05397    0.01889 =
         0.04251   -0.00139    0.02667    0.00208
AFIX 137
HM    2    0.472288    0.874664    0.469810    11.00000   -1.50000
HN    2    0.600442    0.920564    0.500286    11.00000   -1.50000
HO    2    0.623564    0.868400    0.544569    11.00000   -1.50000
AFIX   0

C44   1    0.961852    0.196782    0.691153    11.00000    0.05571    0.03035 =
         0.03644    0.00369    0.02082    0.00982
AFIX 137
HP    2    0.910408    0.172589    0.652020    11.00000   -1.50000
HQ    2    0.902695    0.193938    0.733696    11.00000   -1.50000
HR    2    1.088424    0.189899    0.708554    11.00000   -1.50000
AFIX   0

O1    4    1.032962    0.633144    0.654962    11.00000    0.02430    0.01836 =
         0.01961   -0.00292    0.00154   -0.00419
O2    4    0.991098    0.463534    0.645189    11.00000    0.02501    0.01737 =
         0.01948    0.00087   -0.00053    0.00170
O4    4    0.347132    0.484392    0.301470    11.00000    0.02069    0.01879 =
         0.02289    0.00082   -0.00289   -0.00258
O3    4    0.498840    0.645917    0.284745    11.00000    0.04535    0.01752 =
         0.01934    0.00310   -0.00103   -0.00407
O5    4    1.016328    0.283428    0.718404    11.00000    0.03304    0.02886 =
         0.02529    0.00787    0.00751    0.00791
O7    4    0.935105    0.345048    0.635867    11.00000    0.05881    0.02927 =
         0.03338    0.00911   -0.01005   -0.00018
C16   1    1.095085    0.364748    0.760828    11.00000    0.03471    0.03254 =
         0.03519    0.00485    0.00404    0.00762
H2    2    0.850635    0.406399    0.567129    11.00000    0.03176
H1    2    0.927623    0.693767    0.584217    11.00000    0.03291
HS    2    0.777126    0.640878    0.228765    11.00000    0.04673
H16A  2    1.070785    0.398620    0.746243    11.00000    0.05342
H16B  2    1.058947    0.357223    0.810471    11.00000    0.05948
HKLF 4

REM  SAS520B2B in P2(1)/c
REM R1 =  0.0379 for    6354 Fo > 4sig(Fo)  and  0.0398 for all    6693 data
REM    516 parameters refined using      0 restraints

END

WGHT      0.0473      1.6954

REM Instructions for potential hydrogen bonds
HTAB C8 O7
HTAB C38 O4
EQIV $1 -x+1, -y+1, -z+1
HTAB C35 O4_$1
EQIV $2 -x+2, y-1/2, -z+3/2
HTAB C44 O1_$2
HTAB N2 O2
HTAB N2 O7
HTAB N1 O1
HTAB C16 O2

REM Highest difference peak  0.356,  deepest hole -0.275,  1-sigma level  0.056
Q1    1   0.9048  0.2924  0.6172  11.00000  0.05    0.36
Q2    1   1.0120  0.3390  0.6162  11.00000  0.05   -0.28
Q3    1   0.7162  0.8390  0.4407  11.00000  0.05    0.27
Q4    1   0.2494  0.5707  0.1785  11.00000  0.05   -0.25
Q5    1   0.7180  0.4399  0.4789  11.00000  0.05   -0.24
Q6    1   0.4972  0.5563  0.3394  11.00000  0.05   -0.24
Q7    1   0.9963  0.2276  0.6995  11.00000  0.05    0.24
Q8    1   0.9805  0.3129  0.6809  11.00000  0.05   -0.24
Q9    1   0.9951  0.3544  0.6833  11.00000  0.05   -0.23
Q10   1   1.0247  0.5906  0.6569  11.00000  0.05   -0.23
Q11   1   0.4360  0.5987  0.2828  11.00000  0.05   -0.23
Q12   1   1.0106  0.5019  0.6472  11.00000  0.05   -0.22
Q13   1   1.2115  0.5431  0.7642  11.00000  0.05   -0.22
Q14   1   0.6071  0.2797  0.3976  11.00000  0.05    0.22
Q15   1   0.8704  0.5706  0.5651  11.00000  0.05   -0.22
Q16   1   1.0520  0.3118  0.7498  11.00000  0.05    0.22
Q17   1   0.9946  0.8899  0.4994  11.00000  0.05   -0.22
Q18   1   1.0810  0.5232  0.7177  11.00000  0.05   -0.21
Q19   1   0.3948  0.5202  0.2945  11.00000  0.05   -0.21
Q20   1   0.6409  0.4322  0.4394  11.00000  0.05   -0.20
;
_shelx_res_checksum   70677

_shelx_hkl_file
;
  -1   0   0   20.98    0.77
   1   0   0   20.60    0.77
   1   0   0   20.87    0.77
  -2   0   0   56.36    2.13
  -2   0   0   57.66    2.14
  -2   0   0   57.98    2.13
   2   0   0   59.52    2.14
  -3   0   0  120.31    4.42
  -3   0   0  117.91    4.41
   3   0   0  116.71    4.06
   3   0   0  124.84    4.44
  -4   0   0   17.94    0.66
  -4   0   0   17.12    0.67
  -4   0   0   17.95    0.62
   4   0   0   18.42    0.62
  -5   0   0   25.36    0.91
  -5   0   0   24.38    0.84
   5   0   0   23.30    0.84
  -6   0   0    4.24    0.17
  -6   0   0    4.04    0.16
  -6   0   0    3.97    0.15
  -6   0   0    3.84    0.15
   6   0   0    4.05    0.16
  -7   0   0    1.97    0.09
  -7   0   0    1.94    0.08
  -7   0   0    2.03    0.09
  -7   0   0    1.99    0.10
   7   0   0    1.98    0.09
  -8   0   0    3.51    0.13
  -8   0   0    3.47    0.13
   8   0   0    3.64    0.12
  -9   0   0    0.34    0.03
  -9   0   0    0.34    0.02
   9   0   0    0.34    0.02
   9  -1   0    0.01    0.01
  -9   1   0    0.01    0.01
   8  -1   0    2.06    0.08
  -8   1   0    1.99    0.08
  -8   1   0    2.03    0.08
  -7   1   0    0.36    0.04
  -7   1   0    0.38    0.04
  -7   1   0    0.33    0.05
   6  -1   0    0.97    0.06
  -6   1   0    0.95    0.08
  -6   1   0    1.03    0.06
  -6   1   0    1.01    0.07
  -6   1   0    0.92    0.07
   5  -1   0    3.41    0.13
  -5   1   0    3.42    0.14
  -5   1   0    3.50    0.14
   4  -1   0   25.06    0.87
  -4   1   0   26.98    0.95
  -4   1   0   24.68    0.95
  -4   1   0   25.53    0.88
   3  -1   0    1.10    0.06
   3  -1   0    1.24    0.05
  -3   1   0    1.20    0.06
  -3   1   0    1.13    0.05
   2  -1   0    0.21    0.01
  -2   1   0    0.19    0.01
  -2   1   0    0.20    0.01
   1  -1   0   30.58    1.11
   1  -1   0   29.46    1.10
  -1   1   0   30.68    1.10
  -1   1   0   28.86    1.10
  -1  -1   0   30.02    1.13
  -1  -1   0   31.64    1.13
   1   1   0   30.61    1.13
   1   1   0   29.82    1.13
  -2  -1   0    0.21    0.02
  -2  -1   0    0.19    0.01
   2   1   0    0.21    0.01
  -3  -1   0    1.07    0.05
  -3  -1   0    1.17    0.06
   3   1   0    1.10    0.05
   3   1   0    1.16    0.05
  -4  -1   0   23.95    0.95
  -4  -1   0   26.51    0.94
  -4  -1   0   24.86    0.88
   4   1   0   26.43    0.87
  -5  -1   0    3.59    0.14
  -5  -1   0    3.57    0.15
   5   1   0    3.52    0.14
  -6  -1   0    1.09    0.07
  -6  -1   0    1.10    0.07
  -6  -1   0    1.12    0.07
  -6  -1   0    1.12    0.07
   6   1   0    1.10    0.06
  -7  -1   0    0.49    0.05
  -7  -1   0    0.43    0.05
   7   1   0    0.64    0.05
  -8  -1   0    2.34    0.09
  -8  -1   0    2.22    0.09
   8   1   0    2.58    0.09
  -9  -1   0    0.02    0.01
   9   1   0    0.01    0.01
   9  -2   0    0.08    0.01
  -9   2   0    0.09    0.01
  -9   2   0    0.08    0.02
   8  -2   0    0.02    0.04
   8  -2   0    0.03    0.02
  -8   2   0    0.02    0.02
  -7   2   0    0.07    0.02
  -7   2   0    0.04    0.03
  -7   2   0    0.07    0.03
   6  -2   0    0.47    0.05
  -6   2   0    0.58    0.05
  -6   2   0    0.50    0.05
  -6   2   0    0.53    0.05
  -6   2   0    0.40    0.06
   5  -2   0    6.16    0.23
  -5   2   0    6.50    0.25
  -5   2   0    6.39    0.24
   4  -2   0    0.69    0.04
  -4   2   0    0.70    0.04
  -4   2   0    0.66    0.04
  -4   2   0    0.73    0.07
   3  -2   0    0.07    0.01
  -3   2   0    0.06    0.02
  -3   2   0    0.07    0.01
  -3   2   0    0.07    0.02
   2  -2   0    0.41    0.02
  -2   2   0    0.38    0.02
  -2   2   0    0.41    0.02
  -2   2   0    0.43    0.02
   1  -2   0    0.01    0.01
   1  -2   0    0.02    0.01
  -1   2   0    0.02    0.01
  -1   2   0    0.02    0.01
   0  -2   0   13.02    0.47
   0  -2   0   12.48    0.47
   0   2   0   12.63    0.47
   0   2   0   13.05    0.48
  -1  -2   0    0.02    0.01
  -1  -2   0    0.03    0.01
   1   2   0    0.01    0.01
   1   2   0    0.01    0.01
  -2  -2   0    0.42    0.02
  -2  -2   0    0.33    0.02
   2   2   0    0.44    0.02
  -3  -2   0    0.07    0.02
   3   2   0    0.05    0.02
   3   2   0    0.05    0.01
  -4  -2   0    0.71    0.04
  -4  -2   0    0.70    0.05
   4   2   0    0.65    0.04
  -5  -2   0    6.58    0.26
  -5  -2   0    6.56    0.24
   5   2   0    6.42    0.24
  -6  -2   0    0.52    0.05
  -6  -2   0    0.62    0.06
  -6  -2   0    0.54    0.06
   6   2   0    0.54    0.05
  -7  -2   0    0.11    0.03
  -7  -2   0    0.07    0.03
  -7  -2   0    0.05    0.03
   7   2   0    0.09    0.03
  -8  -2   0    0.05    0.03
  -8  -2   0    0.02    0.02
   8   2   0    0.06    0.04
  -9  -2   0    0.08    0.01
  -9  -2   0    0.07    0.01
  -9  -2   0    0.07    0.01
   9   2   0    0.09    0.01
   9  -3   0    2.99    0.10
  -9   3   0    3.08    0.10
   8  -3   0    2.88    0.10
  -8   3   0    2.66    0.11
  -8   3   0    3.05    0.11
  -8   3   0    3.21    0.11
  -7   3   0    0.94    0.06
  -7   3   0    0.92    0.06
  -7   3   0    0.96    0.05
   6  -3   0    0.11    0.03
  -6   3   0    0.07    0.03
  -6   3   0    0.03    0.03
  -6   3   0    0.05    0.04
  -6   3   0    0.05    0.02
  -5   3   0    9.40    0.36
  -5   3   0    9.56    0.34
   4  -3   0   21.48    0.73
  -4   3   0   20.52    0.73
  -4   3   0   21.36    0.78
   3  -3   0   -0.01    0.01
  -3   3   0    0.00    0.01
  -3   3   0   -0.01    0.01
  -3   3   0   -0.01    0.02
   2  -3   0    1.06    0.04
  -2   3   0    1.04    0.05
  -2   3   0    1.03    0.04
  -2   3   0    1.08    0.04
   1  -3   0   13.24    0.48
   1  -3   0   12.83    0.48
  -1   3   0   13.26    0.48
  -1   3   0   12.44    0.48
  -1   3   0   13.02    0.48
   0  -3   0   -0.02    0.00
   0   3   0   -0.02    0.00
  -1  -3   0   15.90    0.52
  -1  -3   0   13.69    0.51
   1   3   0   12.44    0.51
   1   3   0   13.51    0.51
  -2  -3   0    1.07    0.05
   2   3   0    1.00    0.04
  -3  -3   0   -0.02    0.02
  -3  -3   0   -0.01    0.01
   3   3   0    0.01    0.01
  -4  -3   0   22.08    0.81
  -4  -3   0   20.92    0.75
   4   3   0   22.20    0.75
  -5  -3   0    9.00    0.33
  -5  -3   0    9.49    0.35
   5   3   0    8.98    0.33
  -6  -3   0    0.06    0.03
  -6  -3   0    0.08    0.03
  -6  -3   0    0.04    0.04
  -6  -3   0    0.07    0.04
   6   3   0    0.05    0.03
  -7  -3   0    0.82    0.06
  -7  -3   0    0.88    0.06
  -7  -3   0    0.95    0.06
   7   3   0    0.90    0.06
  -8  -3   0    2.68    0.11
  -8  -3   0    3.21    0.11
  -8  -3   0    3.16    0.11
   8   3   0    2.94    0.10
  -9  -3   0    3.13    0.10
  -9  -3   0    3.02    0.10
  -9  -3   0    3.10    0.10
   9   3   0    3.10    0.10
   9  -4   0    0.35    0.02
  -9   4   0    0.30    0.02
  -9   4   0    0.35    0.02
   8  -4   0    1.21    0.07
   8  -4   0    1.33    0.06
  -8   4   0    1.25    0.06
  -8   4   0    1.21    0.06
  -8   4   0    1.29    0.06
  -7   4   0    2.44    0.11
  -7   4   0    2.54    0.10
  -7   4   0    2.38    0.09
   6  -4   0    6.15    0.23
  -6   4   0    6.04    0.21
  -6   4   0    6.04    0.23
  -6   4   0    6.02    0.19
  -6   4   0    5.90    0.21
  -6   4   0    6.51    0.25
   5  -4   0   58.30    2.02
  -5   4   0   59.33    2.18
  -5   4   0   60.37    2.03
   4  -4   0    8.59    0.31
  -4   4   0    8.98    0.34
  -4   4   0    9.16    0.32
   3  -4   0    8.80    0.32
  -3   4   0    8.64    0.32
  -3   4   0    8.01    0.30
  -3   4   0    8.38    0.32
   2  -4   0   27.05    1.02
  -2   4   0   27.70    1.02
  -2   4   0   28.57    1.02
  -2   4   0   27.51    1.02
   1  -4   0    0.05    0.01
   1  -4   0    0.06    0.01
  -1   4   0    0.04    0.01
  -1   4   0    0.05    0.01
  -1   4   0    0.04    0.01
   0  -4   0   14.15    0.54
   0  -4   0   14.64    0.55
   0   4   0   14.63    0.54
   0   4   0   15.03    0.55
   0   4   0   14.93    0.54
  -1  -4   0    0.04    0.01
  -1  -4   0    0.04    0.01
   1   4   0    0.04    0.01
   1   4   0    0.07    0.01
  -2  -4   0   28.07    1.04
   2   4   0   28.22    1.04
  -3  -4   0    8.40    0.31
  -3  -4   0    8.11    0.29
   3   4   0    7.93    0.29
  -4  -4   0    8.96    0.31
   4   4   0    8.19    0.30
  -5  -4   0   61.40    2.03
  -5  -4   0   59.04    2.18
   5   4   0   56.83    2.20
   5   4   0   60.08    2.02
  -6  -4   0    6.63    0.25
  -6  -4   0    6.39    0.26
   6   4   0    6.44    0.24
  -7  -4   0    2.32    0.11
  -7  -4   0    2.41    0.10
  -7  -4   0    2.47    0.10
   7   4   0    2.46    0.09
   7   4   0    2.49    0.11
  -8  -4   0    1.28    0.06
  -8  -4   0    1.26    0.06
  -8  -4   0    1.25    0.06
  -8  -4   0    1.27    0.06
   8   4   0    1.21    0.07
   8   4   0    1.31    0.06
  -9  -4   0    0.36    0.03
  -9  -4   0    0.33    0.02
   9   4   0    0.37    0.02
   8  -5   0    4.71    0.15
   8  -5   0    4.41    0.17
  -8   5   0    4.59    0.16
  -8   5   0    4.55    0.16
  -8   5   0    4.75    0.15
  -8   5   0    4.87    0.16
  -7   5   0    0.56    0.04
  -7   5   0    0.59    0.05
  -7   5   0    0.57    0.05
  -6   5   0    2.40    0.10
  -6   5   0    2.28    0.11
  -6   5   0    2.46    0.11
  -6   5   0    2.14    0.10
  -6   5   0    2.55    0.11
  -6   5   0    2.46    0.10
   5  -5   0    1.30    0.07
  -5   5   0    1.39    0.07
  -5   5   0    1.47    0.07
   4  -5   0    0.22    0.03
  -4   5   0    0.18    0.02
   3  -5   0    0.03    0.02
   3  -5   0    0.04    0.01
  -3   5   0    0.03    0.01
  -3   5   0    0.05    0.02
  -3   5   0    0.03    0.01
  -2   5   0    0.04    0.01
  -2   5   0    0.03    0.01
   1  -5   0  212.72    7.71
  -1   5   0  211.56    7.71
  -1   5   0  209.14    7.70
  -1   5   0  205.46    7.68
   0  -5   0   -0.02    0.00
   0  -5   0   -0.03    0.00
   0   5   0   -0.03    0.00
   0   5   0   -0.03    0.00
  -1  -5   0  196.25    7.49
  -1  -5   0  199.41    7.48
   1   5   0  208.39    7.49
   1   5   0  209.47    7.49
  -2  -5   0    0.02    0.01
   2   5   0    0.02    0.01
  -3  -5   0    0.03    0.02
  -3  -5   0    0.02    0.02
   3   5   0    0.05    0.02
  -4  -5   0    0.15    0.03
   4   5   0    0.16    0.02
  -5  -5   0    1.23    0.07
  -5  -5   0    1.34    0.07
   5   5   0    1.34    0.10
   5   5   0    1.38    0.07
  -6  -5   0    2.53    0.11
  -6  -5   0    2.37    0.12
   6   5   0    2.48    0.11
  -7  -5   0    0.61    0.06
  -7  -5   0    0.57    0.05
  -7  -5   0    0.57    0.05
   7   5   0    0.48    0.05
  -8  -5   0    4.66    0.16
  -8  -5   0    4.55    0.16
  -8  -5   0    4.76    0.15
   8   5   0    4.86    0.15
   8   5   0    4.44    0.18
   8  -6   0    1.08    0.06
  -8   6   0    1.06    0.05
  -8   6   0    0.88    0.05
  -8   6   0    0.82    0.05
  -7   6   0    0.07    0.02
  -7   6   0    0.06    0.02
  -7   6   0    0.06    0.03
  -7   6   0    0.10    0.03
  -7   6   0    0.06    0.02
  -6   6   0    7.58    0.26
  -6   6   0    8.45    0.30
  -6   6   0    7.76    0.31
  -6   6   0    8.32    0.27
  -5   6   0   11.84    0.37
  -5   6   0   10.71    0.33
  -5   6   0   11.45    0.43
  -5   6   0   11.50    0.40
   4  -6   0    1.30    0.07
  -4   6   0    1.38    0.06
  -4   6   0    1.41    0.06
   3  -6   0    0.19    0.02
   3  -6   0    0.20    0.03
  -3   6   0    0.23    0.02
  -3   6   0    0.19    0.03
  -3   6   0    0.20    0.02
   2  -6   0   14.15    0.52
  -2   6   0   13.87    0.49
  -2   6   0   14.35    0.52
  -2   6   0   14.34    0.52
  -2   6   0   13.77    0.52
   1  -6   0   26.69    0.98
  -1   6   0   26.99    0.99
  -1   6   0   26.13    0.98
  -1   6   0   26.86    0.98
   0  -6   0   21.24    0.81
   0   6   0   21.95    0.81
   0   6   0   22.55    0.81
   0   6   0   22.15    0.81
  -1  -6   0   28.46    1.02
   1   6   0   27.33    1.02
   1   6   0   27.02    1.02
  -2  -6   0   14.22    0.51
   2   6   0   13.22    0.47
  -3  -6   0    0.18    0.02
  -4  -6   0    1.31    0.07
   4   6   0    1.32    0.07
   4   6   0    1.16    0.06
  -5  -6   0   11.63    0.40
  -5  -6   0   11.18    0.43
   5   6   0   11.42    0.39
   5   6   0   10.32    0.44
  -6  -6   0    8.49    0.31
  -6  -6   0    8.04    0.33
   6   6   0    8.26    0.30
  -7  -6   0    0.07    0.03
  -7  -6   0    0.06    0.03
  -7  -6   0    0.10    0.03
   7   6   0    0.08    0.03
   7   6   0    0.04    0.02
  -8  -6   0    0.83    0.04
  -8  -6   0    0.64    0.04
   8   6   0    0.61    0.04
   8  -7   0    3.69    0.14
   8  -7   0    3.82    0.12
  -8   7   0    3.87    0.12
  -8   7   0    3.57    0.13
  -8   7   0    3.84    0.13
  -8   7   0    3.91    0.13
  -7   7   0    0.05    0.02
  -7   7   0    0.06    0.02
  -7   7   0    0.12    0.03
  -7   7   0    0.12    0.02
  -7   7   0    0.13    0.03
  -6   7   0    0.47    0.05
  -6   7   0    0.61    0.05
  -6   7   0    0.50    0.05
  -5   7   0    7.29    0.26
  -5   7   0    7.11    0.28
  -4   7   0    6.19    0.23
  -4   7   0    6.25    0.24
   3  -7   0   51.68    2.01
   3  -7   0   55.46    2.01
  -3   7   0   56.17    2.01
  -3   7   0   56.90    1.86
  -3   7   0   53.27    2.01
   2  -7   0    0.04    0.01
   2  -7   0    0.04    0.01
  -2   7   0    0.04    0.01
   1  -7   0   47.06    1.68
   1  -7   0   46.18    1.69
  -1   7   0   46.13    1.68
  -1   7   0   42.89    1.68
  -1   7   0   45.91    1.68
   0  -7   0    0.00    0.01
  -1  -7   0   48.34    1.74
   1   7   0   46.45    1.74
   1   7   0   46.64    1.74
  -2  -7   0    0.03    0.01
   2   7   0    0.01    0.02
   2   7   0    0.05    0.02
  -3  -7   0   50.72    1.77
   3   7   0   53.42    1.77
  -4  -7   0    6.32    0.23
   4   7   0    6.01    0.22
   4   7   0    6.21    0.25
  -5  -7   0    7.33    0.27
  -5  -7   0    7.20    0.28
   5   7   0    7.13    0.26
   5   7   0    6.94    0.30
  -6  -7   0    0.33    0.05
  -6  -7   0    0.41    0.05
  -6  -7   0    0.47    0.05
  -6  -7   0    0.48    0.07
   6   7   0    0.49    0.04
  -8  -7   0    3.95    0.13
  -8  -7   0    3.97    0.13
   8   7   0    3.64    0.15
  -8   8   0    0.85    0.04
  -8   8   0    0.82    0.04
  -8   8   0    0.81    0.05
  -7   8   0    4.92    0.17
  -7   8   0    5.02    0.19
  -7   8   0    5.12    0.17
  -7   8   0    5.17    0.16
  -7   8   0    4.90    0.16
  -6   8   0    0.54    0.04
  -6   8   0    0.57    0.06
  -6   8   0    0.55    0.06
  -6   8   0    0.51    0.04
  -6   8   0    0.50    0.05
  -5   8   0    1.67    0.08
  -5   8   0    1.49    0.07
  -5   8   0    1.61    0.10
  -5   8   0    1.72    0.08
  -4   8   0    0.00    0.01
  -4   8   0    0.01    0.02
   3  -8   0    3.81    0.16
   3  -8   0    3.95    0.15
  -3   8   0    4.09    0.15
  -3   8   0    4.04    0.15
  -3   8   0    3.86    0.16
   2  -8   0   13.55    0.51
   2  -8   0   13.63    0.51
  -2   8   0   13.88    0.47
  -2   8   0   13.62    0.51
  -2   8   0   13.89    0.51
  -2   8   0   13.89    0.51
   1  -8   0   10.65    0.40
   1  -8   0   10.59    0.40
  -1   8   0   11.12    0.41
  -1   8   0   11.02    0.40
  -1   8   0   11.22    0.40
   0  -8   0   33.78    1.22
   0   8   0   33.15    1.22
   0   8   0   32.61    1.22
   0   8   0   32.55    1.21
  -1  -8   0   11.14    0.40
   1   8   0   10.34    0.40
   1   8   0   10.54    0.40
  -2  -8   0   13.96    0.49
   2   8   0   12.28    0.49
  -3  -8   0    3.88    0.15
   3   8   0    3.92    0.14
  -4  -8   0   -0.01    0.02
   4   8   0    0.03    0.02
  -5  -8   0    1.69    0.09
   5   8   0    1.80    0.08
   6   8   0    1.73    0.08
   6   8   0    1.91    0.08
  -7  -8   0    5.22    0.18
  -7  -8   0    5.12    0.18
  -7  -8   0    5.24    0.21
   7   8   0    5.10    0.16
   7   8   0    5.20    0.20
  -8  -8   0    0.98    0.05
  -8  -8   0    1.21    0.05
   8   8   0    1.00    0.05
   8  -9   0    5.88    0.18
  -8   9   0    6.00    0.19
  -8   9   0    5.91    0.18
  -7   9   0    1.43    0.06
  -7   9   0    1.35    0.07
  -7   9   0    1.41    0.07
  -7   9   0    1.52    0.07
  -6   9   0    0.01    0.05
  -6   9   0    0.02    0.02
  -6   9   0    0.09    0.04
  -6   9   0    0.04    0.02
  -6   9   0    0.05    0.02
  -5   9   0    0.11    0.03
  -5   9   0    0.10    0.02
  -5   9   0    0.12    0.03
  -5   9   0    0.04    0.05
  -4   9   0   12.34    0.42
  -4   9   0   12.16    0.46
  -4   9   0   11.84    0.45
   3  -9   0    5.10    0.19
   3  -9   0    4.69    0.19
  -3   9   0    5.18    0.18
  -3   9   0    5.20    0.19
  -3   9   0    4.69    0.19
   2  -9   0   13.37    0.50
   2  -9   0   13.66    0.50
  -2   9   0   13.74    0.50
  -2   9   0   12.93    0.45
  -2   9   0   13.13    0.50
  -2   9   0   13.44    0.46
  -2   9   0   13.93    0.50
   1  -9   0    8.27    0.30
   1  -9   0    8.28    0.30
  -1   9   0    8.02    0.30
  -1   9   0    8.35    0.30
  -1   9   0    7.57    0.30
  -1  -9   0    8.10    0.31
   1   9   0    8.16    0.31
  -2  -9   0   13.55    0.46
   2   9   0   13.36    0.50
   2   9   0   12.54    0.45
  -3  -9   0    5.09    0.19
   3   9   0    4.98    0.18
  -4  -9   0   11.88    0.43
   4   9   0   12.05    0.42
  -5  -9   0    0.17    0.03
   5   9   0    0.09    0.02
  -6  -9   0    0.11    0.03
  -6  -9   0    0.03    0.03
  -6  -9   0    0.05    0.05
   6   9   0    0.01    0.03
   6   9   0    0.07    0.02
  -7  -9   0    1.34    0.08
  -7  -9   0    1.53    0.07
  -7  -9   0    1.39    0.08
   7   9   0    1.62    0.08
   7   9   0    1.45    0.07
  -8  -9   0    6.06    0.19
  -8  -9   0    5.85    0.19
   8   9   0    6.06    0.18
   8 -10   0    0.38    0.03
  -8  10   0    0.34    0.03
  -8  10   0    0.33    0.03
  -8  10   0    0.29    0.03
   7 -10   0    0.43    0.04
  -7  10   0    0.50    0.05
  -7  10   0    0.52    0.04
  -7  10   0    0.53    0.04
  -7  10   0    0.51    0.04
  -6  10   0    1.18    0.08
  -6  10   0    1.20    0.06
  -6  10   0    1.21    0.06
  -6  10   0    1.19    0.08
  -5  10   0    0.02    0.02
  -5  10   0    0.07    0.03
  -5  10   0    0.03    0.02
  -5  10   0    0.02    0.03
  -5  10   0    0.07    0.05
  -4  10   0   17.41    0.65
  -4  10   0   16.89    0.61
  -4  10   0   18.30    0.65
   3 -10   0    3.67    0.15
  -3  10   0    3.92    0.15
   2 -10   0    0.00    0.01
   2 -10   0    0.02    0.01
  -2  10   0    0.00    0.02
  -2  10   0    0.02    0.01
   1 -10   0   11.69    0.43
   1 -10   0   11.56    0.43
  -1  10   0   11.09    0.43
  -1  10   0   12.03    0.43
   0  10   0   24.52    0.82
   0  10   0   24.44    0.92
   0  10   0   25.55    0.92
   0  10   0   24.84    0.92
  -1 -10   0   11.82    0.44
   1  10   0   11.50    0.44
  -2 -10   0    0.02    0.02
   2  10   0    0.02    0.02
   2  10   0   -0.05    0.03
   2  10   0   -0.03    0.02
  -3 -10   0    3.73    0.14
   3  10   0    3.52    0.13
  -4 -10   0   17.69    0.62
   4  10   0   17.47    0.61
  -5 -10   0    0.02    0.04
  -5 -10   0    0.04    0.03
   5  10   0    0.04    0.04
   5  10   0    0.11    0.02
  -6 -10   0    1.24    0.08
  -6 -10   0    1.25    0.11
  -6 -10   0    1.27    0.07
   6  10   0    1.20    0.07
  -7 -10   0    0.51    0.05
  -7 -10   0    0.63    0.06
  -7 -10   0    0.55    0.05
   7  10   0    0.52    0.05
   7  10   0    0.46    0.04
  -8 -10   0    0.30    0.03
  -8 -10   0    0.38    0.03
   8  10   0    0.36    0.03
   8 -11   0    0.97    0.04
  -8  11   0    0.96    0.04
  -8  11   0    0.94    0.05
  -8  11   0    1.01    0.04
   7 -11   0    0.02    0.03
   7 -11   0    0.00    0.02
  -7  11   0    0.02    0.02
  -7  11   0    0.01    0.02
  -7  11   0    0.01    0.02
  -7  11   0    0.02    0.02
  -6  11   0   -0.01    0.04
  -6  11   0    0.02    0.02
  -6  11   0    0.02    0.02
  -6  11   0    0.01    0.04
  -5  11   0    0.04    0.03
  -5  11   0    0.08    0.03
  -5  11   0    0.13    0.03
  -5  11   0    0.05    0.02
  -5  11   0    0.12    0.03
  -5  11   0    0.07    0.04
  -4  11   0    2.33    0.10
  -4  11   0    2.48    0.10
  -4  11   0    2.21    0.09
  -4  11   0    2.21    0.09
  -4  11   0    2.37    0.10
  -3  11   0   31.47    1.13
  -3  11   0   29.73    1.01
  -3  11   0   30.88    1.05
   2 -11   0    1.18    0.06
   2 -11   0    1.36    0.06
  -2  11   0    1.30    0.06
  -2  11   0    1.30    0.06
   1 -11   0   70.79    2.70
   1 -11   0   74.68    2.70
  -1  11   0   72.49    2.70
  -1  11   0   73.62    2.70
  -1  11   0   74.67    2.40
   0 -11   0    0.00    0.01
   0  11   0    0.02    0.01
  -1 -11   0   75.46    2.68
   1  11   0   70.17    2.47
   1  11   0   73.07    2.68
  -2 -11   0    1.33    0.06
   2  11   0    1.28    0.08
   2  11   0    1.33    0.06
   2  11   0    1.19    0.06
  -3 -11   0   29.74    1.04
  -3 -11   0   30.65    1.14
   3  11   0   30.71    1.04
  -4 -11   0    2.42    0.11
   4  11   0    2.37    0.10
  -5 -11   0    0.10    0.04
  -5 -11   0    0.06    0.03
   5  11   0    0.09    0.04
   5  11   0    0.05    0.02
  -6 -11   0    0.06    0.03
  -6 -11   0    0.06    0.03
  -6 -11   0    0.01    0.03
  -6 -11   0    0.05    0.06
   6  11   0    0.03    0.02
   6  11   0    0.02    0.03
   6  11   0    0.00    0.03
  -7 -11   0    0.07    0.03
  -7 -11   0   -0.01    0.03
  -7 -11   0    0.01    0.03
  -7 -11   0   -0.03    0.02
   7  11   0    0.00    0.02
   7  11   0    0.02    0.02
  -8 -11   0    1.07    0.05
  -8 -11   0    1.00    0.05
  -8  12   0    1.66    0.06
  -8  12   0    1.59    0.06
   7 -12   0    0.45    0.04
  -7  12   0    0.47    0.03
  -7  12   0    0.47    0.04
  -7  12   0    0.53    0.04
  -6  12   0    1.36    0.09
  -6  12   0    1.28    0.06
  -6  12   0    1.30    0.06
  -6  12   0    1.37    0.06
  -6  12   0    1.31    0.06
  -6  12   0    1.32    0.08
  -5  12   0    0.21    0.03
  -5  12   0    0.26    0.04
  -5  12   0    0.31    0.05
  -5  12   0    0.31    0.04
  -4  12   0    0.61    0.07
  -4  12   0    0.70    0.05
  -3  12   0   11.16    0.41
  -3  12   0   10.62    0.41
   2 -12   0    0.96    0.04
   2 -12   0    0.83    0.05
  -2  12   0    0.94    0.04
  -2  12   0    0.90    0.05
  -2  12   0    0.91    0.05
   1 -12   0   16.36    0.60
   1 -12   0   15.99    0.60
  -1  12   0   17.15    0.60
  -1  12   0   15.60    0.60
  -1  12   0   16.00    0.54
   0 -12   0   59.82    2.16
   0  12   0   57.12    2.16
   0  12   0   59.25    1.92
   1  12   0   14.51    0.52
   1  12   0   15.67    0.57
  -2 -12   0    0.87    0.05
   2  12   0    0.90    0.05
  -3 -12   0   10.96    0.38
  -3 -12   0   10.45    0.41
   3  12   0   10.57    0.37
  -4 -12   0    0.69    0.05
   4  12   0    0.63    0.04
  -5 -12   0    0.21    0.04
   5  12   0    0.24    0.03
   5  12   0    0.30    0.05
  -6 -12   0    1.33    0.07
  -6 -12   0    1.38    0.08
  -6 -12   0    1.19    0.12
  -6 -12   0    1.34    0.07
   6  12   0    1.34    0.07
   6  12   0    1.30    0.07
  -7 -12   0    0.42    0.05
  -7 -12   0    0.43    0.06
  -7 -12   0    0.38    0.04
  -7 -12   0    0.48    0.05
  -8 -12   0    1.71    0.07
  -8 -12   0    1.69    0.07
  -8  13   0    6.18    0.20
   7 -13   0    5.92    0.21
  -7  13   0    5.73    0.19
  -7  13   0    6.01    0.19
  -6  13   0    0.06    0.03
  -6  13   0    0.14    0.04
  -6  13   0    0.13    0.02
  -6  13   0    0.04    0.05
  -6  13   0    0.10    0.02
  -6  13   0    0.06    0.02
  -5  13   0    0.64    0.05
  -5  13   0    0.63    0.05
  -5  13   0    0.62    0.05
  -5  13   0    0.64    0.06
  -4  13   0    0.81    0.07
  -4  13   0    0.79    0.05
  -4  13   0    0.81    0.06
  -3  13   0   17.61    0.61
  -3  13   0   19.06    0.68
  -3  13   0   17.92    0.67
  -2  13   0    0.40    0.03
   1 -13   0   18.74    0.62
   1 -13   0   18.50    0.70
   1 -13   0   19.47    0.71
  -1  13   0   19.54    0.63
  -1  13   0   18.79    0.71
  -1  13   0   18.98    0.70
   0  13   0    0.01    0.02
   0  13   0    0.08    0.02
   1  13   0   18.54    0.61
   1  13   0   17.62    0.63
   1  13   0   18.75    0.69
  -2 -13   0    0.37    0.03
   2  13   0    0.34    0.04
   2  13   0    0.35    0.03
  -3 -13   0   17.16    0.61
  -3 -13   0   17.88    0.67
   3  13   0   17.69    0.61
  -4 -13   0    0.73    0.06
   4  13   0    0.85    0.05
  -5 -13   0    0.59    0.06
   5  13   0    0.54    0.04
  -6 -13   0    0.13    0.07
  -6 -13   0    0.05    0.03
  -6 -13   0    0.09    0.03
  -6 -13   0    0.10    0.03
   6  13   0    0.06    0.03
   6  13   0    0.10    0.03
   6  13   0    0.15    0.03
  -7 -13   0    5.74    0.19
  -7 -13   0    5.76    0.19
  -7 -13   0    5.49    0.23
  -8 -13   0    6.06    0.19
  -8 -13   0    6.08    0.19
  -8  14   0   10.77    0.34
  -8  14   0   11.29    0.33
   7 -14   0    2.12    0.09
  -7  14   0    2.16    0.08
  -7  14   0    2.00    0.08
  -7  14   0    2.29    0.08
   6 -14   0    0.05    0.02
  -6  14   0    0.08    0.04
  -6  14   0    0.09    0.05
  -6  14   0    0.06    0.02
  -6  14   0    0.07    0.02
  -6  14   0    0.07    0.03
  -6  14   0    0.10    0.02
  -5  14   0    0.20    0.03
  -5  14   0    0.21    0.04
  -5  14   0    0.32    0.04
  -4  14   0    2.50    0.11
  -4  14   0    2.33    0.11
  -3  14   0    1.61    0.07
  -2  14   0    1.03    0.05
  -2  14   0    1.03    0.06
  -2  14   0    1.03    0.05
   1 -14   0    0.39    0.04
  -1  14   0    0.41    0.03
   0  14   0    8.88    0.30
   0  14   0    8.37    0.33
   1  14   0    0.39    0.03
   1  14   0    0.36    0.05
   1  14   0    0.37    0.04
  -2 -14   0    1.00    0.05
  -2 -14   0    1.01    0.07
   2  14   0    0.95    0.06
   2  14   0    0.96    0.05
  -3 -14   0    1.36    0.07
  -3 -14   0    1.32    0.10
  -4 -14   0    2.33    0.11
   4  14   0    2.10    0.09
  -5 -14   0    0.19    0.04
  -5 -14   0    0.23    0.04
   5  14   0    0.26    0.04
   5  14   0    0.16    0.03
  -6 -14   0    0.06    0.03
  -6 -14   0    0.08    0.03
  -6 -14   0    0.11    0.03
   6  14   0    0.08    0.03
  -7 -14   0    2.10    0.08
  -7 -14   0    2.17    0.09
  -7 -14   0    2.48    0.09
  -8 -14   0   11.08    0.33
  -8 -14   0   10.81    0.34
  -7  15   0    3.08    0.11
   6 -15   0    6.81    0.24
  -6  15   0    6.91    0.21
  -6  15   0    6.85    0.21
  -6  15   0    6.69    0.23
  -5  15   0    0.06    0.02
  -5  15   0    0.00    0.02
  -5  15   0    0.00    0.03
  -5  15   0    0.04    0.02
  -5  15   0   -0.01    0.03
  -5  15   0    0.02    0.02
  -4  15   0    2.10    0.09
  -4  15   0    1.80    0.12
  -4  15   0    2.14    0.08
  -4  15   0    2.20    0.10
  -3  15   0    1.39    0.07
  -3  15   0    1.45    0.07
  -3  15   0    1.17    0.07
  -2  15   0    0.34    0.03
   1 -15   0   16.02    0.54
  -1  15   0   16.66    0.55
  -1  15   0   16.15    0.61
  -1  15   0   16.96    0.61
   0 -15   0    0.01    0.02
   0  15   0    0.03    0.02
  -1 -15   0   16.50    0.61
   1  15   0   15.73    0.55
  -2 -15   0    0.08    0.04
  -2 -15   0    0.05    0.02
   2  15   0    0.04    0.02
   2  15   0    0.03    0.02
  -3 -15   0    1.14    0.06
   3  15   0    1.17    0.06
  -4 -15   0    2.14    0.10
   4  15   0    2.16    0.09
   4  15   0    2.08    0.09
  -5 -15   0    0.01    0.03
  -5 -15   0    0.10    0.03
  -6 -15   0    6.87    0.26
  -6 -15   0    6.70    0.23
  -6 -15   0    6.67    0.22
   6  15   0    6.94    0.25
   6  15   0    6.69    0.22
  -7 -15   0    3.06    0.11
  -7 -15   0    3.15    0.12
  -7 -15   0    3.33    0.12
  -8 -15   0    4.55    0.14
  -8 -15   0    4.59    0.14
   7 -16   0    0.01    0.02
  -7  16   0    0.04    0.02
  -7  16   0   -0.01    0.01
  -7  16   0    0.04    0.03
  -7  16   0    0.02    0.01
   6 -16   0    6.09    0.22
  -6  16   0    6.44    0.19
  -6  16   0    6.11    0.20
  -6  16   0    6.31    0.21
   5 -16   0    4.76    0.17
  -5  16   0    4.72    0.16
  -5  16   0    4.77    0.15
  -5  16   0    4.38    0.19
  -5  16   0    4.77    0.16
  -5  16   0    4.62    0.17
  -4  16   0    8.31    0.28
  -4  16   0    8.21    0.27
  -4  16   0    8.34    0.33
  -4  16   0    8.30    0.29
  -4  16   0    8.68    0.25
  -4  16   0    8.84    0.27
  -3  16   0    0.81    0.05
  -3  16   0    0.93    0.06
  -3  16   0    0.72    0.06
  -3  16   0    0.78    0.05
   2 -16   0    1.76    0.07
  -2  16   0    1.65    0.08
  -2  16   0    1.65    0.08
   1 -16   0    0.27    0.03
  -1  16   0    0.19    0.03
  -1  16   0    0.16    0.03
   0  16   0    0.90    0.05
   1  16   0    0.27    0.03
  -2 -16   0    1.64    0.08
   2  16   0    1.83    0.08
   2  16   0    1.66    0.07
  -3 -16   0    0.77    0.06
  -3 -16   0    0.82    0.08
   3  16   0    0.87    0.09
   3  16   0    0.82    0.05
  -4 -16   0    8.71    0.28
  -4 -16   0    8.63    0.32
   4  16   0    8.74    0.31
  -5 -16   0    4.80    0.19
  -5 -16   0    4.53    0.17
   5  16   0    4.61    0.16
   5  16   0    4.60    0.18
  -6 -16   0    6.41    0.21
  -6 -16   0    5.86    0.25
   6  16   0    6.69    0.23
   6  16   0    6.34    0.21
  -7 -16   0    0.08    0.02
  -7 -16   0    0.00    0.03
  -7  17   0    0.33    0.03
  -7  17   0    0.34    0.03
   6 -17   0    6.87    0.24
  -6  17   0    6.93    0.22
  -6  17   0    6.63    0.23
  -6  17   0    6.83    0.21
  -6  17   0    6.54    0.22
   5 -17   0    6.62    0.23
  -5  17   0    6.58    0.21
  -5  17   0    6.43    0.20
  -5  17   0    6.51    0.26
  -5  17   0    6.57    0.22
  -5  17   0    6.62    0.21
  -5  17   0    6.23    0.22
   4 -17   0   13.55    0.42
  -4  17   0   11.89    0.40
  -4  17   0   12.71    0.41
  -4  17   0   12.97    0.48
  -4  17   0   12.13    0.41
  -4  17   0   12.32    0.43
   3 -17   0    3.03    0.12
  -3  17   0    3.10    0.12
  -3  17   0    3.04    0.12
  -3  17   0    2.84    0.13
  -3  17   0    2.98    0.13
   2 -17   0    3.40    0.13
  -2  17   0    3.27    0.12
  -2  17   0    3.62    0.14
  -1  17   0    2.26    0.10
   0  17   0    0.01    0.02
  -1 -17   0    2.38    0.10
   1  17   0    2.51    0.10
   1  17   0    1.92    0.10
  -2 -17   0    3.38    0.14
   2  17   0    3.38    0.13
  -3 -17   0    2.81    0.12
   3  17   0    2.72    0.11
  -4 -17   0   12.86    0.41
  -4 -17   0   13.39    0.47
   4  17   0   12.93    0.46
  -5 -17   0    6.52    0.22
  -5 -17   0    6.46    0.25
   5  17   0    6.48    0.24
   5  17   0    6.46    0.22
  -6 -17   0    6.72    0.21
  -6 -17   0    6.61    0.22
  -6 -17   0    6.60    0.26
   6  17   0    6.62    0.24
   6  17   0    6.54    0.22
  -7 -17   0    0.31    0.03
  -7 -17   0    0.38    0.04
  -7  18   0    1.37    0.05
  -6  18   0    6.39    0.20
  -6  18   0    6.49    0.21
   5 -18   0    0.90    0.05
  -5  18   0    0.73    0.06
  -5  18   0    0.73    0.05
  -5  18   0    0.77    0.05
  -5  18   0    0.74    0.07
  -5  18   0    0.71    0.05
  -5  18   0    0.77    0.04
   4 -18   0    0.45    0.04
  -4  18   0    0.49    0.06
  -4  18   0    0.53    0.04
  -4  18   0    0.56    0.04
  -4  18   0    0.37    0.05
  -4  18   0    0.60    0.05
  -4  18   0    0.52    0.05
  -4  18   0    0.56    0.04
   3 -18   0    0.05    0.02
  -3  18   0    0.06    0.03
  -3  18   0    0.08    0.03
  -3  18   0    0.05    0.04
  -3  18   0    0.05    0.02
   2 -18   0    1.48    0.07
  -2  18   0    1.35    0.06
  -2  18   0    1.48    0.07
  -2  18   0    1.45    0.09
  -2  18   0    1.43    0.07
  -1  18   0    3.58    0.13
  -1  18   0    3.27    0.13
  -1  18   0    3.18    0.12
   0  18   0    1.67    0.09
   0  18   0    1.68    0.08
   0  18   0    1.78    0.09
   0  18   0    1.87    0.08
   0  18   0    1.66    0.09
  -1 -18   0    3.45    0.13
   1  18   0    3.55    0.15
   1  18   0    3.24    0.13
   1  18   0    3.29    0.13
  -2 -18   0    1.50    0.07
   2  18   0    1.40    0.08
   2  18   0    1.20    0.11
   2  18   0    1.47    0.07
  -3 -18   0    0.01    0.03
   3  18   0    0.06    0.02
   3  18   0    0.12    0.05
  -4 -18   0    0.51    0.05
  -4 -18   0    0.43    0.06
   4  18   0    0.44    0.05
  -5 -18   0    0.62    0.06
  -5 -18   0    0.65    0.06
   5  18   0    0.76    0.05
   5  18   0    0.73    0.05
  -6 -18   0    6.03    0.25
   6  18   0    6.27    0.23
   6  18   0    6.51    0.21
  -7 -18   0    1.39    0.06
  -7  19   0    4.77    0.15
  -7  19   0    4.79    0.16
   6 -19   0   20.57    0.68
  -6  19   0   20.74    0.64
   5 -19   0    5.93    0.21
  -5  19   0    6.02    0.20
  -5  19   0    6.00    0.20
  -5  19   0    5.69    0.19
  -5  19   0    5.56    0.24
  -4  19   0    5.77    0.20
  -4  19   0    5.85    0.18
  -4  19   0    5.47    0.23
  -4  19   0    5.80    0.20
  -4  19   0    5.78    0.19
  -4  19   0    5.53    0.19
   3 -19   0   13.32    0.44
  -3  19   0   13.61    0.42
  -3  19   0   13.17    0.43
  -3  19   0   13.11    0.51
  -3  19   0   13.46    0.43
  -3  19   0   13.55    0.38
  -3  19   0   12.81    0.46
   2 -19   0    0.08    0.03
  -2  19   0   -0.05    0.05
  -2  19   0    0.03    0.03
  -1  19   0   12.51    0.41
  -1  19   0   12.59    0.40
  -1  19   0   12.92    0.44
   0  19   0    0.03    0.03
   0  19   0    0.03    0.02
   0  19   0    0.04    0.03
  -1 -19   0   13.42    0.45
   1  19   0   12.29    0.41
   1  19   0   13.31    0.44
   1  19   0   11.72    0.41
   1  19   0   12.83    0.41
  -2 -19   0    0.05    0.02
   2  19   0    0.11    0.06
   2  19   0    0.06    0.03
  -3 -19   0   12.49    0.46
   3  19   0   13.05    0.42
   3  19   0   12.83    0.45
  -4 -19   0    5.72    0.23
  -4 -19   0    5.87    0.20
   4  19   0    5.50    0.22
   4  19   0    5.83    0.20
  -5 -19   0    5.94    0.23
  -5 -19   0    5.78    0.19
  -5 -19   0    5.82    0.20
   5  19   0    6.07    0.20
  -6 -19   0   19.77    0.72
  -6 -19   0   20.63    0.61
   6  19   0   19.63    0.70
   6  19   0   21.26    0.63
  -7 -19   0    4.92    0.15
   7  19   0    4.50    0.15
  -6  20   0    2.23    0.08
  -6  20   0    2.25    0.08
  -5  20   0    1.36    0.06
  -5  20   0    1.36    0.06
  -5  20   0    1.34    0.07
   4 -20   0    0.32    0.04
  -4  20   0    0.39    0.05
  -4  20   0    0.30    0.04
  -4  20   0    0.25    0.04
  -4  20   0    0.32    0.04
  -4  20   0    0.30    0.04
   3 -20   0    0.01    0.03
  -3  20   0    0.03    0.03
  -3  20   0    0.04    0.03
  -3  20   0    0.00    0.02
  -3  20   0    0.00    0.04
  -3  20   0    0.00    0.03
  -2  20   0    2.04    0.09
  -2  20   0    1.93    0.09
  -2  20   0    1.87    0.09
  -2  20   0    1.97    0.10
  -1  20   0    4.74    0.17
  -1  20   0    4.61    0.17
  -1  20   0    4.70    0.18
   0  20   0   20.19    0.62
   0  20   0   18.70    0.60
   0  20   0   19.63    0.63
   0  20   0   20.54    0.67
  -1 -20   0    4.50    0.18
   1  20   0    4.68    0.18
   1  20   0    4.71    0.18
  -2 -20   0    1.90    0.09
   2  20   0    1.68    0.09
  -3 -20   0    0.02    0.03
  -3 -20   0    0.01    0.03
   3  20   0   -0.01    0.03
  -4 -20   0    0.27    0.04
  -4 -20   0    0.31    0.05
   4  20   0    0.26    0.04
  -5 -20   0    1.43    0.08
   5  20   0    1.39    0.07
   5  20   0    1.40    0.07
  -6 -20   0    2.08    0.08
   6  20   0    2.06    0.09
  -7 -20   0    1.48    0.06
  -6  21   0    1.41    0.06
  -6  21   0    1.38    0.06
  -5  21   0    5.08    0.17
  -5  21   0    5.13    0.18
  -5  21   0    4.96    0.17
  -4  21   0    0.11    0.03
  -4  21   0    0.08    0.02
  -4  21   0    0.08    0.04
  -3  21   0    0.23    0.04
  -3  21   0    0.30    0.04
  -2  21   0    6.64    0.23
  -2  21   0    6.72    0.24
  -2  21   0    5.64    0.21
  -2  21   0    6.60    0.22
  -2  21   0    6.57    0.23
  -1  21   0   14.99    0.47
  -1  21   0   15.02    0.51
  -1  21   0   14.99    0.48
  -1  21   0   14.44    0.48
   0  21   0    0.01    0.03
   0  21   0    0.07    0.04
   0  21   0    0.00    0.03
  -1 -21   0   14.78    0.52
   1  21   0   14.98    0.50
   1  21   0   14.34    0.47
  -2 -21   0    6.47    0.25
   2  21   0    5.90    0.23
   2  21   0    7.08    0.23
   2  21   0    6.37    0.24
  -3 -21   0    0.19    0.03
  -3 -21   0    0.17    0.04
   3  21   0    0.12    0.03
   4  21   0    0.11    0.03
  -5 -21   0    5.35    0.18
  -5 -21   0    5.16    0.21
   5  21   0    5.15    0.18
  -6 -21   0    1.40    0.06
   6  21   0    1.41    0.06
  -6  22   0    0.54    0.03
  -6  22   0    0.61    0.03
  -5  22   0   10.59    0.33
  -5  22   0   10.06    0.33
  -4  22   0    3.60    0.13
  -4  22   0    3.58    0.13
  -4  22   0    3.52    0.12
  -3  22   0    3.06    0.13
  -3  22   0    3.96    0.13
  -3  22   0    3.56    0.15
  -2  22   0    1.00    0.06
  -2  22   0    0.92    0.06
  -2  22   0    0.98    0.07
  -2  22   0    1.04    0.07
  -1  22   0   33.98    1.04
  -1  22   0   32.68    1.02
  -1  22   0   32.42    1.10
  -1  22   0   33.53    1.03
   0  22   0    0.83    0.06
   0  22   0    0.96    0.09
   0  22   0    0.82    0.07
   0  22   0    1.11    0.07
  -1 -22   0   33.14    1.11
   1  22   0   31.81    0.98
   1  22   0   32.85    1.07
   1  22   0   30.44    1.00
  -2 -22   0    0.93    0.06
   2  22   0    0.93    0.07
  -3 -22   0    2.78    0.11
  -3 -22   0    2.66    0.12
   3  22   0    2.88    0.12
   3  22   0    2.49    0.11
  -4 -22   0    3.61    0.13
  -4 -22   0    3.47    0.15
   4  22   0    3.54    0.13
   5  22   0   10.50    0.31
   5  22   0    8.91    0.35
  -6 -22   0    0.63    0.04
   6  22   0    0.57    0.04
  -6  23   0    1.38    0.05
   5 -23   0    0.00    0.03
  -5  23   0    0.02    0.02
  -5  23   0    0.01    0.02
   4 -23   0    1.02    0.07
  -4  23   0    1.12    0.05
  -4  23   0    0.97    0.05
  -4  23   0    1.13    0.07
  -4  23   0    1.01    0.06
  -3  23   0    1.69    0.07
  -3  23   0    1.70    0.08
  -2  23   0    0.01    0.03
  -2  23   0    0.06    0.03
  -2  23   0    0.05    0.03
  -2  23   0    0.03    0.04
  -1  23   0   38.98    1.24
  -1  23   0   40.35    1.32
  -1  23   0   39.88    1.25
   0 -23   0    0.01    0.02
   0  23   0    0.21    0.04
   0  23   0   -0.01    0.03
   0  23   0    0.17    0.04
   0  23   0   -0.01    0.03
  -1 -23   0   41.08    1.34
   1  23   0   37.84    1.20
   1  23   0   37.77    1.16
  -2 -23   0    0.01    0.02
   2  23   0    0.00    0.04
   2  23   0    0.00    0.03
  -3 -23   0    1.55    0.08
  -3 -23   0    1.53    0.09
   3  23   0    1.69    0.09
   3  23   0    1.67    0.08
  -4 -23   0    1.10    0.07
  -4 -23   0    0.93    0.06
  -5 -23   0    0.02    0.02
   5  23   0    0.02    0.03
  -6 -23   0    1.41    0.06
  -6  24   0    0.80    0.04
  -5  24   0    1.10    0.05
  -4  24   0    1.39    0.06
  -4  24   0    1.31    0.06
  -3  24   0    4.49    0.16
  -3  24   0    4.65    0.17
  -3  24   0    4.65    0.16
  -3  24   0    4.51    0.18
  -2  24   0    0.71    0.06
  -2  24   0    0.66    0.06
  -2  24   0    0.71    0.05
  -2  24   0    0.73    0.05
  -1  24   0   25.33    0.87
  -1  24   0   25.20    0.81
  -1  24   0   26.82    0.81
   0 -24   0    2.22    0.10
   0  24   0    2.37    0.10
   0  24   0    2.39    0.10
   0  24   0    2.25    0.11
  -1 -24   0   26.50    0.90
   1  24   0   26.12    0.82
   1  24   0   25.89    0.80
   1  24   0   24.46    0.79
  -2 -24   0    0.70    0.06
   2  24   0    0.77    0.06
   2  24   0    0.86    0.07
   2  24   0    0.69    0.07
  -3 -24   0    4.87    0.17
  -3 -24   0    4.70    0.19
   3  24   0    4.71    0.18
   4  24   0    1.44    0.07
   4  24   0    1.26    0.08
  -5 -24   0    1.02    0.05
   5  24   0    1.07    0.05
   5  24   0    0.79    0.07
  -6 -24   0    0.79    0.04
   6  24   0    0.80    0.04
  -5  25   0    0.70    0.04
  -5  25   0    0.66    0.04
  -4  25   0    0.94    0.05
  -4  25   0    0.79    0.04
  -3  25   0    0.36    0.04
  -3  25   0    0.38    0.05
  -3  25   0    0.46    0.04
  -3  25   0    0.29    0.05
  -2  25   0    0.38    0.04
  -2  25   0    0.50    0.04
  -2  25   0    0.45    0.04
  -2  25   0    0.41    0.05
  -1  25   0    0.64    0.05
  -1  25   0    0.74    0.06
  -1  25   0    0.63    0.06
   0 -25   0    0.01    0.02
   0  25   0   -0.01    0.03
   0  25   0    0.02    0.03
  -1 -25   0    0.63    0.05
   1  25   0    0.63    0.06
   1  25   0    0.65    0.06
   1  25   0    0.68    0.06
  -2 -25   0    0.46    0.05
  -2 -25   0    0.40    0.05
   2  25   0    0.45    0.05
   2  25   0    0.50    0.05
   2  25   0    0.44    0.05
  -3 -25   0    0.37    0.04
  -3 -25   0    0.47    0.05
  -4 -25   0    0.84    0.05
   4  25   0    1.00    0.05
   4  25   0    0.90    0.07
  -5 -25   0    0.68    0.04
   5  25   0    0.68    0.04
  -5  26   0    1.14    0.05
  -5  26   0    1.18    0.05
   4 -26   0    0.03    0.02
  -4  26   0    0.09    0.02
  -4  26   0    0.08    0.02
  -3  26   0    2.25    0.09
  -3  26   0    2.26    0.09
  -3  26   0    2.42    0.10
  -2  26   0    0.27    0.04
  -2  26   0    0.21    0.04
  -2  26   0    0.23    0.03
  -1  26   0    0.66    0.06
  -1  26   0    0.61    0.05
  -1  26   0    0.76    0.06
   0 -26   0    3.97    0.16
   0  26   0    3.86    0.15
   0  26   0    4.03    0.15
  -1 -26   0    0.65    0.05
   1  26   0    0.70    0.06
   1  26   0    0.71    0.06
  -2 -26   0    0.19    0.03
  -2 -26   0    0.19    0.03
   2  26   0    0.25    0.04
   2  26   0    0.26    0.03
   2  26   0    0.25    0.04
  -4 -26   0    0.09    0.02
   4  26   0    0.02    0.03
  -5 -26   0    1.12    0.05
   5  26   0    1.09    0.05
   5  26   0    1.11    0.05
  -4  27   0    0.55    0.03
  -4  27   0    0.60    0.04
  -3  27   0   -0.03    0.02
  -2  27   0    0.83    0.06
  -2  27   0    0.80    0.05
  -2  27   0    0.89    0.07
   1 -27   0    0.02    0.02
  -1  27   0    0.05    0.03
  -1  27   0    0.08    0.03
   0 -27   0    0.03    0.02
   0  27   0    0.01    0.03
   0  27   0    0.03    0.03
  -1 -27   0    0.07    0.03
   1  27   0    0.07    0.03
   1  27   0    0.04    0.03
  -2 -27   0    0.82    0.06
  -2 -27   0    0.75    0.05
  -3 -27   0    0.01    0.02
  -4 -27   0    0.63    0.04
   4  27   0    0.59    0.04
   4  27   0    0.53    0.05
   4  27   0    0.58    0.04
  -4  28   0    0.30    0.03
  -3  28   0    0.08    0.02
  -3  28   0    0.09    0.02
  -2  28   0    0.01    0.02
  -2  28   0    0.00    0.03
  -1  28   0    0.02    0.03
  -1  28   0    0.00    0.02
   0 -28   0    0.22    0.03
   0  28   0    0.22    0.03
   0  28   0    0.26    0.04
  -1 -28   0    0.02    0.03
   1  28   0    0.03    0.03
  -2 -28   0    0.01    0.02
   2  28   0    0.05    0.03
   2  28   0    0.02    0.02
   2  28   0   -0.01    0.03
  -3 -28   0    0.06    0.02
   3  28   0    0.05    0.02
   4  28   0    0.29    0.03
  -2  29   0    0.16    0.03
  -2  29   0    0.18    0.03
  -1  29   0    0.35    0.05
   0  29   0   -0.01    0.02
   0  29   0    0.01    0.02
  -1 -29   0    0.28    0.04
   1  29   0    0.34    0.04
   1  29   0    0.35    0.04
  -2 -29   0    0.20    0.02
   2  29   0    0.14    0.03
  -3 -29   0    0.31    0.03
   3  29   0    0.26    0.03
   3  29   0    0.18    0.03
  -3  30   0    1.64    0.07
  -2  30   0    0.02    0.03
  -2  30   0    0.01    0.02
  -1  30   0    1.27    0.07
  -1  30   0    1.35    0.06
   0  30   0    1.14    0.06
   0  30   0    1.22    0.06
  -1 -30   0    1.33    0.06
   1  30   0    1.31    0.06
   2  30   0    0.02    0.02
  -3 -30   0    1.51    0.06
   3  30   0    1.39    0.06
   3  30   0    1.54    0.06
   3  30   0    1.51    0.07
  -2  31   0    0.84    0.04
  -1  31   0    0.04    0.02
  -1  31   0    0.06    0.02
   0  31   0    0.02    0.02
   0  31   0   -0.03    0.02
   1  31   0    0.04    0.02
   2  31   0    0.80    0.04
  -1  32   0    5.63    0.18
   0 -32   0    0.47    0.03
   0  32   0    0.49    0.03
   0  32   0    0.51    0.04
   1  32   0    5.99    0.19
   1  32   0    5.32    0.18
   1  32  -1    0.52    0.04
  -1 -32   1    0.59    0.03
   0  32  -1    0.51    0.04
   0  32  -1    0.48    0.04
   0 -32   1    0.54    0.03
   2  31  -1    0.02    0.02
   2  31  -1    0.07    0.02
   1  31  -1    1.95    0.08
   1  31  -1    1.95    0.08
  -1 -31   1    2.02    0.07
   0  31  -1    0.00    0.02
   0  31  -1    0.00    0.02
  -1  31  -1    2.63    0.10
  -1  31  -1    2.80    0.10
  -2  31  -1    4.62    0.15
   3  30  -1    0.56    0.04
   3  30  -1    0.50    0.04
  -3 -30   1    0.57    0.03
   2  30  -1    1.04    0.06
  -2 -30   1    1.07    0.05
   1  30  -1    0.79    0.05
  -1 -30   1    0.87    0.05
   0  30  -1    0.49    0.04
   0  30  -1    0.43    0.04
  -1  30  -1    0.09    0.03
  -1  30  -1    0.05    0.02
  -2  30  -1    0.11    0.02
  -3  30  -1    0.58    0.04
   4  29  -1    0.02    0.02
  -4 -29   1    0.01    0.01
   3  29  -1    1.65    0.07
   3  29  -1    1.56    0.06
  -3 -29   1    1.65    0.07
   2  29  -1    0.81    0.05
  -2 -29   1    0.82    0.05
   1  29  -1    0.04    0.03
  -1 -29   1    0.05    0.02
   0  29  -1    0.19    0.03
   0  29  -1    0.19    0.03
  -1  29  -1    0.10    0.03
  -2  29  -1    0.44    0.04
  -3  29  -1    0.83    0.05
   4  28  -1    0.63    0.04
   3  28  -1    0.66    0.05
   3  28  -1    0.67    0.04
  -3 -28   1    0.71    0.04
   2  28  -1    0.62    0.05
   2  28  -1    0.69    0.05
   1  28  -1    0.04    0.03
   0  28  -1    1.36    0.07
   0  28  -1    1.44    0.07
  -1  28  -1    0.10    0.03
  -1  28  -1    0.07    0.03
  -2  28  -1    0.42    0.05
  -2  28  -1    0.37    0.04
  -3  28  -1    0.89    0.05
  -3  28  -1    0.90    0.05
  -4  28  -1    1.34    0.06
  -4  28  -1    1.39    0.06
   5  27  -1    0.33    0.03
   4  27  -1    0.10    0.02
   4  27  -1    0.08    0.03
   4  27  -1    0.09    0.02
  -4 -27   1    0.09    0.02
   3  27  -1    2.81    0.10
  -2 -27   1    0.23    0.03
  -2 -27   1    0.22    0.03
   1  27  -1    0.56    0.05
   1  27  -1    0.53    0.05
  -1 -27   1    0.47    0.05
   0  27  -1    0.76    0.06
   0  27  -1    0.80    0.06
   0 -27   1    0.88    0.06
  -1  27  -1    0.71    0.05
  -1  27  -1    0.71    0.05
  -1  27  -1    0.73    0.06
   1 -27   1    0.68    0.05
  -2  27  -1    0.51    0.05
  -2  27  -1    0.44    0.06
  -2  27  -1    0.50    0.04
  -3  27  -1    0.02    0.02
  -3  27  -1    0.01    0.02
  -4  27  -1    5.05    0.17
   5  26  -1    0.03    0.01
   5  26  -1    0.05    0.02
   4  26  -1    0.60    0.04
  -4 -26   1    0.52    0.04
   3  26  -1    0.19    0.03
  -3 -26   1    0.17    0.04
  -3 -26   1    0.18    0.03
   2  26  -1    3.74    0.14
   2  26  -1    3.66    0.14
   2  26  -1    3.70    0.13
   2  26  -1    3.56    0.13
  -2 -26   1    3.53    0.15
  -2 -26   1    3.71    0.13
   1  26  -1    0.10    0.03
   1  26  -1    0.15    0.03
   1  26  -1    0.14    0.04
  -1 -26   1    0.16    0.03
   0  26  -1   10.23    0.35
   0  26  -1   10.73    0.34
   0 -26   1   10.13    0.37
  -1  26  -1    0.31    0.04
  -1  26  -1    0.30    0.04
  -1  26  -1    0.44    0.06
  -2  26  -1    8.42    0.29
  -2  26  -1    8.80    0.29
  -3  26  -1    0.03    0.02
  -4  26  -1    1.19    0.05
  -4  26  -1    1.12    0.05
   4 -26   1    1.13    0.05
  -5  26  -1    0.43    0.03
   5 -26   1    0.41    0.03
  -5 -25   1    2.57    0.09
   4  25  -1    0.02    0.02
   4  25  -1    0.02    0.03
  -4 -25   1    0.01    0.02
   3  25  -1    2.65    0.11
  -3 -25   1    2.65    0.11
  -3 -25   1    2.78    0.12
   2  25  -1    4.40    0.15
   2  25  -1    4.23    0.16
   2  25  -1    4.10    0.16
  -2 -25   1    4.45    0.18
   1  25  -1    0.85    0.07
   1  25  -1    0.73    0.06
   1  25  -1    0.83    0.06
  -1 -25   1    0.77    0.06
   0  25  -1    0.03    0.03
   0  25  -1    0.00    0.03
   0  25  -1    0.00    0.03
   0  25  -1    0.03    0.04
   0  25  -1    0.02    0.03
   0 -25   1    0.04    0.02
  -1  25  -1    1.38    0.08
  -1  25  -1    1.31    0.08
  -1  25  -1    1.23    0.07
  -1  25  -1    1.30    0.07
  -2  25  -1    0.52    0.05
  -2  25  -1    0.59    0.06
  -2  25  -1    0.55    0.05
  -2  25  -1    0.50    0.05
  -3  25  -1    0.06    0.02
  -3  25  -1    0.00    0.03
  -3  25  -1    0.00    0.02
  -4  25  -1    2.19    0.09
  -4  25  -1    2.27    0.09
  -5  25  -1    0.10    0.02
  -5  25  -1    0.10    0.02
   5  24  -1    0.08    0.02
  -5 -24   1    0.06    0.02
   4  24  -1    0.59    0.05
  -4 -24   1    0.58    0.05
  -4 -24   1    0.58    0.06
   3  24  -1    5.37    0.18
  -3 -24   1    5.29    0.18
  -3 -24   1    5.14    0.21
   2  24  -1    0.11    0.03
   2  24  -1    0.18    0.04
   2  24  -1    0.15    0.04
  -2 -24   1    0.17    0.03
   1  24  -1   12.80    0.40
   1  24  -1   12.85    0.41
   1  24  -1   12.11    0.39
  -1 -24   1   12.21    0.45
   0  24  -1    3.41    0.13
   0  24  -1    3.40    0.14
   0  24  -1    3.31    0.14
   0  24  -1    3.28    0.14
   0  24  -1    3.22    0.13
   0 -24   1    3.33    0.14
  -1  24  -1    1.04    0.06
  -1  24  -1    1.07    0.07
  -1  24  -1    0.94    0.07
  -2  24  -1    0.44    0.04
  -2  24  -1    0.50    0.07
  -2  24  -1    0.37    0.05
  -2  24  -1    0.38    0.05
  -2  24  -1    0.47    0.05
  -3  24  -1    0.26    0.04
  -3  24  -1    0.16    0.03
  -3  24  -1    0.24    0.03
  -4  24  -1    0.00    0.02
  -4  24  -1    0.02    0.02
  -5  24  -1    0.35    0.03
   6  23  -1    1.40    0.06
   5  23  -1    0.86    0.07
   5  23  -1    0.99    0.05
  -5 -23   1    0.97    0.06
   4  23  -1    7.99    0.26
  -4 -23   1    8.15    0.26
  -4 -23   1    7.85    0.30
   3  23  -1    2.00    0.10
   3  23  -1    2.01    0.09
  -3 -23   1    1.96    0.09
  -3 -23   1    2.08    0.10
   2  23  -1    2.97    0.13
   2  23  -1    3.00    0.13
   2  23  -1    2.96    0.12
  -2 -23   1    2.99    0.13
   1  23  -1   22.14    0.69
   1  23  -1   21.28    0.66
   1  23  -1   21.54    0.74
   1  23  -1   22.71    0.70
   0  23  -1    3.79    0.15
   0  23  -1    3.76    0.14
   0  23  -1    3.75    0.15
   0  23  -1    3.70    0.15
  -1  23  -1    3.75    0.14
  -2  23  -1    0.75    0.07
  -2  23  -1    0.68    0.06
  -2  23  -1    0.73    0.05
  -2  23  -1    0.86    0.06
  -3  23  -1    0.09    0.03
  -3  23  -1    0.10    0.03
  -3  23  -1    0.08    0.02
  -4  23  -1    0.85    0.05
  -4  23  -1    0.84    0.07
  -4  23  -1    0.80    0.05
   4 -23   1    0.74    0.06
  -5  23  -1    0.04    0.02
   6  22  -1   11.34    0.35
   6  22  -1   10.56    0.40
  -6 -22   1   11.88    0.35
   5  22  -1    0.77    0.05
  -5 -22   1    0.76    0.05
  -5 -22   1    0.81    0.07
   4  22  -1    0.17    0.03
  -4 -22   1    0.12    0.03
  -4 -22   1    0.14    0.03
   3  22  -1    9.57    0.31
   3  22  -1    8.93    0.34
  -3 -22   1    9.83    0.35
  -3 -22   1    9.34    0.30
   2  22  -1    0.25    0.04
  -2 -22   1    0.21    0.04
   1  22  -1  110.71    3.60
   1  22  -1  119.20    3.89
  -1 -22   1  126.78    4.05
   0  22  -1    0.12    0.03
  -1  22  -1    0.80    0.06
  -1  22  -1    0.90    0.06
  -1  22  -1    1.02    0.07
  -2  22  -1    0.03    0.03
  -2  22  -1    0.04    0.03
  -2  22  -1    0.06    0.03
  -3  22  -1    5.70    0.20
  -3  22  -1    5.50    0.20
  -3  22  -1    5.45    0.19
  -3  22  -1    5.53    0.21
  -3  22  -1    5.69    0.19
   3 -22   1    5.74    0.20
  -4  22  -1    4.00    0.15
  -4  22  -1    4.12    0.14
  -4  22  -1    4.16    0.16
  -4  22  -1    4.29    0.15
   4 -22   1    4.28    0.15
  -5  22  -1    0.40    0.04
  -5  22  -1    0.44    0.04
   5 -22   1    0.44    0.04
  -6  22  -1    0.12    0.02
  -6  22  -1    0.06    0.01
   6 -22   1    0.04    0.03
   6  21  -1    0.01    0.02
  -6 -21   1    0.05    0.02
   5  21  -1    9.81    0.32
  -5 -21   1   10.12    0.32
  -5 -21   1   10.02    0.37
   4  21  -1    5.93    0.20
   4  21  -1    5.73    0.22
  -4 -21   1    6.14    0.23
  -4 -21   1    6.07    0.20
   3  21  -1    0.27    0.04
  -3 -21   1    0.31    0.04
  -3 -21   1    0.33    0.05
   2  21  -1    0.07    0.04
  -2 -21   1    0.09    0.03
   1  21  -1   13.99    0.45
   1  21  -1   14.40    0.46
   1  21  -1   14.25    0.46
   1  21  -1   14.27    0.49
  -1 -21   1   14.26    0.50
   0  21  -1    9.85    0.33
   0  21  -1   10.12    0.33
   0  21  -1   10.41    0.36
  -1  21  -1    2.16    0.09
  -2  21  -1    4.70    0.17
  -2  21  -1    4.69    0.18
  -2  21  -1    4.60    0.18
  -2  21  -1    4.36    0.17
  -3  21  -1   23.65    0.79
  -3  21  -1   23.15    0.72
  -3  21  -1   23.33    0.74
  -3  21  -1   23.36    0.73
  -4  21  -1    1.13    0.06
  -4  21  -1    1.11    0.05
  -4  21  -1    1.11    0.06
  -5  21  -1    7.93    0.27
  -5  21  -1    7.85    0.26
  -5  21  -1    8.10    0.26
   5 -21   1    8.13    0.27
  -6  21  -1    0.01    0.02
  -6  21  -1    0.04    0.01
  -6  21  -1    0.00    0.02
  -7 -20   1    5.56    0.18
   6  20  -1    2.91    0.11
   6  20  -1    2.78    0.12
  -6 -20   1    3.05    0.11
   5  20  -1    0.24    0.03
  -5 -20   1    0.35    0.04
  -5 -20   1    0.31    0.04
  -5 -20   1    0.24    0.04
   4  20  -1    0.01    0.03
   4  20  -1   -0.05    0.04
  -4 -20   1   -0.02    0.03
  -4 -20   1    0.00    0.03
   3  20  -1    2.55    0.12
  -3 -20   1    2.58    0.12
   2  20  -1   10.60    0.35
   2  20  -1   11.14    0.37
   2  20  -1   10.59    0.35
   2  20  -1   10.31    0.38
  -2 -20   1   11.12    0.39
   1  20  -1    1.34    0.07
   1  20  -1    1.15    0.07
   1  20  -1    1.02    0.08
  -1 -20   1    1.13    0.06
   0  20  -1    2.26    0.10
   0  20  -1    2.55    0.11
   0  20  -1    2.52    0.11
  -1  20  -1    7.15    0.24
  -1  20  -1    7.76    0.26
  -1  20  -1    7.65    0.27
  -1  20  -1    7.46    0.25
  -2  20  -1    0.16    0.04
  -2  20  -1    0.24    0.05
  -2  20  -1    0.24    0.03
  -2  20  -1    0.22    0.04
  -2  20  -1    0.22    0.04
   2 -20   1    0.19    0.03
  -3  20  -1    0.14    0.04
  -3  20  -1    0.15    0.03
  -3  20  -1    0.12    0.04
   3 -20   1    0.15    0.03
  -4  20  -1    0.44    0.04
  -4  20  -1    0.45    0.05
  -4  20  -1    0.43    0.04
   4 -20   1    0.47    0.04
  -5  20  -1    8.00    0.25
  -5  20  -1    7.86    0.25
  -5  20  -1    7.73    0.26
   5 -20   1    7.69    0.27
  -6  20  -1    1.32    0.06
  -6  20  -1    1.36    0.05
   7  19  -1   -0.02    0.02
   6  19  -1    3.08    0.13
   6  19  -1    3.08    0.11
  -6 -19   1    3.30    0.12
   5  19  -1   15.28    0.47
  -5 -19   1   14.37    0.46
  -5 -19   1   14.55    0.53
  -5 -19   1   15.00    0.46
  -4 -19   1    6.61    0.22
  -4 -19   1    6.68    0.26
   3  19  -1    1.94    0.09
   3  19  -1    2.14    0.11
  -3 -19   1    2.08    0.10
  -3 -19   1    2.01    0.11
   2  19  -1    0.02    0.03
   2  19  -1   -0.02    0.03
   2  19  -1    0.01    0.03
  -2 -19   1    0.01    0.02
   1  19  -1    0.15    0.03
   1  19  -1    0.09    0.04
  -1 -19   1    0.14    0.03
   0  19  -1    5.45    0.20
   0  19  -1    5.32    0.19
  -1  19  -1    1.00    0.06
  -1  19  -1    1.06    0.07
  -2  19  -1    0.64    0.07
  -2  19  -1    0.68    0.06
  -2  19  -1    0.65    0.05
  -2  19  -1    0.65    0.05
  -2  19  -1    0.63    0.07
  -3  19  -1   13.67    0.45
  -3  19  -1   14.11    0.48
  -3  19  -1   13.83    0.44
  -3  19  -1   14.20    0.45
   3 -19   1   13.60    0.46
  -4  19  -1    0.39    0.05
  -4  19  -1    0.29    0.05
  -4  19  -1    0.32    0.05
  -4  19  -1    0.37    0.04
   4 -19   1    0.41    0.04
  -5  19  -1    3.87    0.13
  -5  19  -1    3.87    0.14
   5 -19   1    3.82    0.14
  -7  19  -1    1.81    0.06
  -7 -18   1    8.19    0.26
   6  18  -1    5.12    0.17
   6  18  -1    4.96    0.19
  -6 -18   1    5.05    0.17
  -6 -18   1    4.77    0.20
  -6 -18   1    5.02    0.17
   5  18  -1    0.81    0.05
   5  18  -1    0.77    0.05
  -5 -18   1    0.74    0.06
  -5 -18   1    0.84    0.06
  -5 -18   1    0.67    0.06
  -4 -18   1    0.09    0.03
  -4 -18   1    0.04    0.03
   3  18  -1    4.75    0.18
   3  18  -1    4.70    0.18
  -3 -18   1    4.65    0.17
  -3 -18   1    4.79    0.19
  -3 -18   1    4.95    0.17
   2  18  -1    0.33    0.04
   2  18  -1    0.33    0.05
   2  18  -1    0.42    0.06
  -2 -18   1    0.40    0.04
   1  18  -1    0.54    0.05
   1  18  -1    0.62    0.08
  -1 -18   1    0.59    0.04
   0  18  -1    0.17    0.05
   0  18  -1    0.13    0.03
   0  18  -1    0.11    0.04
   0  18  -1    0.13    0.04
  -1  18  -1    5.93    0.21
  -1  18  -1    6.18    0.22
  -2  18  -1    0.64    0.07
  -2  18  -1    0.66    0.06
  -2  18  -1    0.71    0.05
   2 -18   1    0.66    0.04
  -3  18  -1    3.63    0.15
  -3  18  -1    3.78    0.13
  -3  18  -1    3.57    0.13
  -3  18  -1    3.33    0.15
  -3  18  -1    3.91    0.15
  -3  18  -1    3.72    0.14
   3 -18   1    3.73    0.14
  -4  18  -1    3.04    0.14
  -4  18  -1    2.86    0.11
  -4  18  -1    3.14    0.11
  -4  18  -1    3.13    0.12
  -4  18  -1    3.17    0.11
  -4  18  -1    2.98    0.13
  -4  18  -1    3.12    0.11
  -4  18  -1    3.07    0.13
  -5  18  -1    1.37    0.10
  -5  18  -1    1.44    0.06
  -5  18  -1    1.31    0.06
  -5  18  -1    1.39    0.06
  -5  18  -1    1.45    0.07
   5 -18   1    1.41    0.07
  -6  18  -1    0.25    0.03
  -7  18  -1    0.87    0.04
  -7  18  -1    0.87    0.04
  -7 -17   1    0.48    0.04
  -7 -17   1    0.45    0.04
   6  17  -1    1.10    0.06
   6  17  -1    1.11    0.06
  -6 -17   1    1.06    0.06
  -6 -17   1    1.13    0.06
  -6 -17   1    1.06    0.08
   5  17  -1    0.10    0.03
   5  17  -1    0.10    0.03
  -5 -17   1    0.11    0.03
  -5 -17   1    0.11    0.03
  -5 -17   1    0.10    0.03
   4  17  -1    0.30    0.04
  -4 -17   1    0.37    0.04
  -4 -17   1    0.46    0.05
   3  17  -1    0.13    0.03
  -3 -17   1    0.14    0.04
  -3 -17   1    0.14    0.03
   2  17  -1    0.06    0.03
   2  17  -1    0.09    0.03
  -2 -17   1    0.11    0.03
   1  17  -1    0.94    0.06
   0  17  -1   11.42    0.39
  -1  17  -1    0.22    0.03
   1 -17   1    0.15    0.03
  -2  17  -1    0.07    0.03
  -2  17  -1    0.02    0.02
  -2  17  -1    0.07    0.04
   2 -17   1    0.04    0.02
  -3  17  -1    3.60    0.15
  -3  17  -1    3.93    0.16
  -3  17  -1    3.65    0.15
  -3  17  -1    3.81    0.13
   3 -17   1    3.90    0.14
  -4  17  -1    0.58    0.06
  -4  17  -1    0.61    0.07
  -4  17  -1    0.55    0.05
  -4  17  -1    0.60    0.05
   4 -17   1    0.56    0.04
  -5  17  -1    0.22    0.03
  -5  17  -1    0.33    0.04
  -5  17  -1    0.28    0.03
  -5  17  -1    0.32    0.04
  -5  17  -1    0.35    0.05
  -5  17  -1    0.30    0.05
   5 -17   1    0.28    0.04
  -6  17  -1    0.09    0.02
  -6  17  -1    0.08    0.02
  -6  17  -1    0.14    0.03
   6 -17   1    0.13    0.02
  -7  17  -1    0.06    0.01
   7  16  -1    7.91    0.27
  -7 -16   1    8.73    0.27
  -7 -16   1    8.76    0.27
   6  16  -1    2.30    0.10
   6  16  -1    2.26    0.09
  -6 -16   1    2.24    0.11
  -6 -16   1    2.13    0.09
  -6 -16   1    1.90    0.16
  -6 -16   1    2.19    0.09
   5  16  -1    0.40    0.04
   5  16  -1    0.46    0.05
  -5 -16   1    0.38    0.05
  -5 -16   1    0.38    0.05
   4  16  -1    3.23    0.13
  -4 -16   1    3.14    0.12
  -4 -16   1    3.27    0.14
   3  16  -1   11.56    0.40
   3  16  -1   12.50    0.42
  -3 -16   1   12.25    0.43
   2  16  -1    0.24    0.03
   2  16  -1    0.22    0.03
  -2 -16   1    0.20    0.03
  -2 -16   1    0.15    0.05
   1  16  -1    0.14    0.03
  -1 -16   1    0.09    0.03
   0  16  -1    0.16    0.03
  -1  16  -1    0.03    0.02
   1 -16   1    0.04    0.02
  -2  16  -1    0.71    0.06
  -2  16  -1    0.68    0.05
  -2  16  -1    0.77    0.04
   2 -16   1    0.69    0.04
  -3  16  -1    7.75    0.28
  -3  16  -1    8.03    0.30
  -3  16  -1    7.64    0.27
  -3  16  -1    7.51    0.26
  -3  16  -1    8.10    0.26
  -3  16  -1    7.80    0.24
   3 -16   1    8.13    0.27
  -4  16  -1    5.19    0.19
  -4  16  -1    5.09    0.16
  -4  16  -1    5.01    0.20
  -4  16  -1    5.32    0.21
  -4  16  -1    5.16    0.18
  -4  16  -1    5.03    0.17
   4 -16   1    5.38    0.19
  -5  16  -1   28.95    0.90
  -5  16  -1   29.21    0.88
  -5  16  -1   27.45    1.07
  -5  16  -1   28.15    0.89
  -5  16  -1   29.38    0.81
  -5  16  -1   27.71    0.85
   5 -16   1   29.61    0.94
  -6  16  -1    0.12    0.03
  -6  16  -1    0.11    0.02
   6 -16   1    0.10    0.02
  -7  16  -1    2.06    0.09
  -7  16  -1    2.21    0.07
  -7  16  -1    2.12    0.08
  -7  16  -1    2.13    0.08
  -8 -15   1    8.11    0.25
  -7 -15   1    0.56    0.05
   6  15  -1    1.72    0.08
   6  15  -1    1.70    0.08
  -6 -15   1    1.47    0.14
  -6 -15   1    1.70    0.08
  -6 -15   1    1.82    0.08
  -6 -15   1    1.77    0.10
   5  15  -1    1.78    0.08
   5  15  -1    2.02    0.09
  -5 -15   1    1.85    0.10
  -5 -15   1    1.77    0.09
   4  15  -1    0.12    0.02
  -4 -15   1    0.16    0.03
   3  15  -1    1.97    0.08
  -3 -15   1    1.68    0.13
   2  15  -1    1.28    0.06
  -2 -15   1    1.16    0.06
  -2 -15   1    1.11    0.08
   1  15  -1    0.64    0.04
  -1 -15   1    0.41    0.05
   0  15  -1    6.00    0.23
   0 -15   1    6.85    0.25
  -1  15  -1    2.43    0.10
  -1  15  -1    2.46    0.10
   1 -15   1    2.29    0.09
  -2  15  -1   15.78    0.61
  -2  15  -1   16.60    0.61
   2 -15   1   16.50    0.53
  -3  15  -1    0.58    0.04
  -3  15  -1    0.68    0.06
  -3  15  -1    0.73    0.07
  -4  15  -1   21.66    0.82
  -4  15  -1   21.80    0.62
  -4  15  -1   22.30    0.70
  -4  15  -1   22.35    0.69
  -5  15  -1    0.17    0.02
  -5  15  -1    0.13    0.04
  -5  15  -1    0.18    0.03
  -5  15  -1    0.11    0.04
   5 -15   1    0.12    0.03
  -6  15  -1    0.03    0.02
  -6  15  -1    0.08    0.02
  -6  15  -1    0.00    0.03
  -6  15  -1    0.03    0.02
   6 -15   1    0.05    0.02
  -7  15  -1    2.22    0.08
  -7  15  -1    2.18    0.08
  -7  15  -1    2.43    0.08
  -8 -14   1    5.75    0.18
  -8 -14   1    5.73    0.18
  -7 -14   1    1.84    0.08
  -7 -14   1    1.82    0.07
   6  14  -1    0.67    0.05
   6  14  -1    0.60    0.06
  -6 -14   1    0.71    0.05
  -6 -14   1    0.66    0.06
  -6 -14   1    0.78    0.06
  -6 -14   1    0.70    0.11
   5  14  -1    0.30    0.04
   5  14  -1    0.34    0.04
  -5 -14   1    0.23    0.04
   4  14  -1    1.33    0.07
  -4 -14   1    1.45    0.08
  -4 -14   1    1.34    0.08
   3  14  -1    0.99    0.05
  -3 -14   1    0.99    0.06
  -3 -14   1    1.11    0.09
   2  14  -1   18.75    0.66
   2  14  -1   19.19    0.64
  -2 -14   1   19.76    0.67
  -2 -14   1   19.25    0.73
   1  14  -1   11.46    0.37
   1  14  -1   10.65    0.37
   1  14  -1   10.16    0.42
   0  14  -1   21.78    0.83
   0  14  -1   22.80    0.74
  -1  14  -1   21.41    0.80
   1 -14   1   21.47    0.80
   1 -14   1   21.86    0.70
  -2  14  -1   10.14    0.36
  -2  14  -1    9.60    0.33
  -2  14  -1    9.39    0.36
   2 -14   1    9.24    0.32
  -3  14  -1    0.89    0.07
  -3  14  -1    0.88    0.05
  -3  14  -1    0.87    0.05
  -3  14  -1    0.81    0.06
  -4  14  -1   12.77    0.43
  -4  14  -1   13.81    0.42
  -4  14  -1   12.54    0.45
  -4  14  -1   13.31    0.50
  -5  14  -1    3.70    0.12
  -5  14  -1    3.67    0.16
  -5  14  -1    3.60    0.13
  -5  14  -1    3.65    0.13
  -5  14  -1    3.62    0.14
  -6  14  -1    2.23    0.08
  -6  14  -1    2.14    0.08
  -6  14  -1    2.13    0.08
  -6  14  -1    1.97    0.09
  -6  14  -1    2.16    0.08
   6 -14   1    2.06    0.09
  -7  14  -1    5.50    0.17
  -7  14  -1    5.58    0.18
  -7  14  -1    5.50    0.18
   7 -14   1    5.16    0.19
  -8 -13   1    6.18    0.20
  -7 -13   1    2.64    0.12
  -7 -13   1    2.63    0.10
  -7 -13   1    2.78    0.11
   6  13  -1   11.43    0.36
   6  13  -1   10.77    0.34
   6  13  -1   11.41    0.40
  -6 -13   1   11.77    0.36
  -6 -13   1   11.32    0.36
  -6 -13   1   11.75    0.42
  -6 -13   1   11.06    0.45
   5  13  -1    0.05    0.02
  -5 -13   1    0.03    0.03
   4  13  -1    0.98    0.05
  -4 -13   1    1.03    0.07
  -4 -13   1    0.96    0.06
   3  13  -1    6.04    0.22
  -3 -13   1    6.01    0.23
  -3 -13   1    6.11    0.25
   2  13  -1   11.80    0.41
  -2 -13   1   12.43    0.43
   1  13  -1    1.30    0.06
   1  13  -1    1.14    0.07
   1  13  -1    1.19    0.06
   0  13  -1   11.83    0.40
   0  13  -1   11.75    0.45
  -1  13  -1    4.30    0.17
  -1  13  -1    4.31    0.17
  -1  13  -1    4.45    0.16
   1 -13   1    4.38    0.17
   1 -13   1    4.26    0.15
  -2  13  -1    3.84    0.16
  -2  13  -1    4.23    0.16
  -3  13  -1    0.09    0.03
  -3  13  -1    0.13    0.02
  -3  13  -1    0.10    0.02
  -4  13  -1    4.90    0.16
  -4  13  -1    4.97    0.20
  -4  13  -1    5.01    0.17
  -4  13  -1    4.93    0.19
  -4  13  -1    5.15    0.18
  -5  13  -1    0.05    0.02
  -5  13  -1    0.07    0.03
  -5  13  -1    0.07    0.04
  -5  13  -1    0.04    0.03
  -5  13  -1    0.09    0.03
  -6  13  -1    0.21    0.04
  -6  13  -1    0.08    0.03
  -6  13  -1    0.09    0.02
   6 -13   1    0.03    0.04
   6 -13   1    0.01    0.02
  -7  13  -1    0.01    0.02
  -7  13  -1    0.00    0.02
   7 -13   1    0.04    0.02
  -8  13  -1    5.99    0.19
  -8 -12   1    1.40    0.06
  -8 -12   1    1.36    0.06
  -8 -12   1    1.32    0.06
  -7 -12   1    0.45    0.06
  -7 -12   1    0.44    0.05
  -7 -12   1    0.40    0.04
   6  12  -1    0.68    0.06
   6  12  -1    0.71    0.06
   6  12  -1    0.69    0.05
  -6 -12   1    0.65    0.06
  -6 -12   1    0.67    0.05
  -6 -12   1    0.67    0.09
  -6 -12   1    0.66    0.06
   5  12  -1    2.76    0.12
  -5 -12   1    2.84    0.13
   4  12  -1    9.86    0.35
  -4 -12   1    9.83    0.36
   3  12  -1   38.31    1.24
  -3 -12   1   35.88    1.25
  -3 -12   1   35.11    1.36
   2  12  -1   33.79    1.15
  -2 -12   1   34.06    1.16
   1  12  -1   47.78    1.65
   1  12  -1   49.26    1.79
   0  12  -1  117.90    3.88
   0  12  -1  117.16    4.36
   0 -12   1  120.70    4.39
  -1  12  -1    0.56    0.03
  -1  12  -1    0.55    0.04
  -1  12  -1    0.56    0.04
   1 -12   1    0.50    0.04
   1 -12   1    0.55    0.04
   1 -12   1    0.59    0.03
  -2  12  -1   25.25    0.94
  -2  12  -1   25.71    0.84
   2 -12   1   25.29    0.94
  -3  12  -1    7.46    0.29
  -3  12  -1    7.67    0.29
  -4  12  -1    0.41    0.04
  -4  12  -1    0.36    0.05
  -4  12  -1    0.34    0.03
  -4  12  -1    0.41    0.05
  -4  12  -1    0.50    0.05
  -5  12  -1    0.62    0.05
  -5  12  -1    0.59    0.05
  -5  12  -1    0.68    0.05
  -5  12  -1    0.65    0.05
  -5  12  -1    0.64    0.06
  -5  12  -1    0.62    0.05
  -6  12  -1    0.23    0.04
  -6  12  -1    0.16    0.02
  -6  12  -1    0.16    0.03
  -6  12  -1    0.12    0.03
   6 -12   1    0.15    0.03
  -7  12  -1    0.71    0.04
   7 -12   1    0.76    0.05
  -8  12  -1    7.75    0.24
  -8 -11   1    2.81    0.10
  -8 -11   1    2.68    0.10
  -8 -11   1    2.73    0.10
   7  11  -1    0.76    0.05
  -7 -11   1    0.85    0.07
  -7 -11   1    0.84    0.05
  -7 -11   1    0.70    0.06
   6  11  -1    2.35    0.09
   6  11  -1    2.32    0.10
  -6 -11   1    2.49    0.10
  -6 -11   1    2.08    0.13
  -6 -11   1    2.46    0.12
  -6 -11   1    2.40    0.10
   5  11  -1    0.04    0.04
   5  11  -1    0.03    0.02
  -5 -11   1    0.01    0.03
   4  11  -1   28.53    0.98
  -4 -11   1   28.75    0.99
   3  11  -1   38.93    1.35
  -3 -11   1   40.27    1.36
   2  11  -1   28.83    1.00
   2  11  -1   28.61    1.09
  -2 -11   1   30.29    1.01
   1  11  -1   34.55    1.28
   0  11  -1   46.13    1.73
   0 -11   1   47.96    1.73
  -1  11  -1    1.28    0.06
  -1  11  -1    1.19    0.06
  -1  11  -1    1.29    0.06
   1 -11   1    1.23    0.06
   1 -11   1    1.29    0.06
  -2  11  -1   10.23    0.35
  -2  11  -1   10.02    0.39
  -2  11  -1   10.96    0.39
   2 -11   1   10.44    0.39
   2 -11   1    9.77    0.39
  -4  11  -1    1.30    0.06
  -4  11  -1    1.24    0.06
  -4  11  -1    1.38    0.07
  -4  11  -1    1.24    0.08
  -5  11  -1    0.08    0.04
  -5  11  -1    0.05    0.03
  -5  11  -1    0.08    0.02
  -5  11  -1    0.10    0.03
  -5  11  -1    0.08    0.03
  -6  11  -1    0.20    0.03
  -6  11  -1    0.15    0.03
  -6  11  -1    0.16    0.03
  -6  11  -1    0.19    0.04
  -6  11  -1    0.21    0.03
  -6  11  -1    0.17    0.03
  -7  11  -1   16.65    0.52
  -7  11  -1   17.23    0.50
   7 -11   1   16.23    0.49
   7 -11   1   16.87    0.56
  -8  11  -1    1.81    0.07
  -8  11  -1    1.99    0.07
  -8  11  -1    2.05    0.07
  -8 -10   1    0.35    0.04
  -8 -10   1    0.45    0.03
  -8 -10   1    0.34    0.03
   7  10  -1    0.95    0.05
  -7 -10   1    0.93    0.06
  -7 -10   1    0.92    0.07
  -7 -10   1    0.90    0.06
   6  10  -1    2.38    0.10
   6  10  -1    2.40    0.10
  -6 -10   1    2.31    0.13
  -6 -10   1    2.49    0.10
  -6 -10   1    2.45    0.12
   5  10  -1    0.06    0.02
  -5 -10   1    0.06    0.03
   4  10  -1   12.64    0.43
  -4 -10   1   12.12    0.44
   3  10  -1    0.22    0.03
  -3 -10   1    0.21    0.03
   2  10  -1   34.36    1.24
   2  10  -1   32.53    1.14
   1  10  -1    6.56    0.27
  -1 -10   1    7.23    0.27
   0  10  -1    3.80    0.14
   0  10  -1    4.00    0.15
   0 -10   1    3.85    0.15
  -1  10  -1    0.37    0.02
   1 -10   1    0.34    0.02
   1 -10   1    0.31    0.03
  -2  10  -1    6.43    0.25
  -2  10  -1    6.73    0.23
  -2  10  -1    6.73    0.25
   2 -10   1    6.67    0.25
   2 -10   1    6.28    0.25
  -3  10  -1   19.12    0.71
  -3  10  -1   19.33    0.71
  -3  10  -1   19.34    0.66
  -4  10  -1    0.00    0.02
  -4  10  -1    0.01    0.02
  -5  10  -1    0.21    0.03
  -5  10  -1    0.17    0.03
  -5  10  -1    0.18    0.03
  -5  10  -1    0.18    0.05
  -5  10  -1    0.20    0.03
  -6  10  -1    2.47    0.09
  -6  10  -1    2.46    0.10
  -6  10  -1    2.35    0.11
  -6  10  -1    2.36    0.09
  -6  10  -1    2.34    0.09
  -6  10  -1    2.32    0.10
  -7  10  -1    3.56    0.12
  -7  10  -1    3.57    0.12
   7 -10   1    3.48    0.13
   7 -10   1    3.43    0.12
  -8  10  -1    0.01    0.01
  -8  10  -1   -0.02    0.01
   8 -10   1   -0.04    0.02
  -8  -9   1    0.01    0.02
  -8  -9   1    0.03    0.02
  -8  -9   1    0.02    0.02
   7   9  -1    1.38    0.07
   7   9  -1    1.32    0.06
  -7  -9   1    1.00    0.06
  -7  -9   1    1.11    0.07
  -7  -9   1    1.11    0.06
  -7  -9   1    1.03    0.07
   6   9  -1    0.11    0.03
   6   9  -1    0.16    0.03
  -6  -9   1    0.20    0.05
  -6  -9   1    0.15    0.04
  -6  -9   1    0.12    0.03
   5   9  -1    4.46    0.17
  -5  -9   1    4.44    0.16
  -5  -9   1    4.57    0.18
   4   9  -1    6.09    0.22
  -4  -9   1    6.16    0.23
   3   9  -1    0.36    0.03
  -3  -9   1    0.39    0.04
   2   9  -1    2.31    0.10
   2   9  -1    2.28    0.09
  -2  -9   1    2.44    0.09
  -2  -9   1    2.36    0.10
   1   9  -1    1.98    0.09
  -1  -9   1    2.21    0.09
   0   9  -1   24.24    0.90
   0  -9   1   24.21    0.90
  -1   9  -1    1.61    0.06
  -1   9  -1    1.44    0.06
  -1   9  -1    1.60    0.06
   1  -9   1    1.60    0.07
   1  -9   1    1.55    0.06
  -2   9  -1   19.46    0.71
  -2   9  -1   19.16    0.71
  -2   9  -1   19.01    0.64
  -2   9  -1   19.76    0.66
   2  -9   1   18.65    0.71
   2  -9   1   19.57    0.71
  -3   9  -1   19.84    0.74
  -3   9  -1   20.53    0.69
   3  -9   1   19.43    0.74
  -4   9  -1    2.54    0.10
  -4   9  -1    2.52    0.11
  -5   9  -1    1.99    0.09
  -5   9  -1    1.98    0.09
  -5   9  -1    1.84    0.10
  -5   9  -1    2.19    0.09
  -6   9  -1    1.35    0.07
  -6   9  -1    1.25    0.06
  -6   9  -1    1.30    0.08
  -6   9  -1    1.28    0.06
  -7   9  -1    2.58    0.11
  -7   9  -1    2.66    0.10
   7  -9   1    2.60    0.11
   7  -9   1    2.55    0.09
  -8   9  -1    0.68    0.03
  -8   9  -1    0.64    0.04
   8  -9   1    0.67    0.04
   8   8  -1    1.40    0.06
  -8  -8   1    0.97    0.06
  -8  -8   1    1.08    0.06
  -8  -8   1    1.35    0.06
   7   8  -1    1.31    0.06
   7   8  -1    1.31    0.07
  -7  -8   1    1.31    0.07
  -7  -8   1    1.34    0.07
  -7  -8   1    1.29    0.07
  -7  -8   1    1.43    0.08
   6   8  -1    2.56    0.12
  -6  -8   1    2.88    0.12
  -6  -8   1    2.75    0.13
  -6  -8   1    2.96    0.14
  -6  -8   1    2.91    0.12
   5   8  -1    0.39    0.07
   5   8  -1    0.45    0.04
  -5  -8   1    0.47    0.05
  -5  -8   1    0.42    0.05
   4   8  -1   25.83    0.95
   4   8  -1   24.58    0.87
  -4  -8   1   25.76    0.88
   3   8  -1    0.40    0.03
   2   8  -1   24.15    0.92
   2   8  -1   24.62    0.84
  -2  -8   1   25.19    0.84
   1   8  -1    9.77    0.34
   1   8  -1    8.79    0.35
  -1  -8   1    8.95    0.35
   0  -8   1    0.09    0.01
  -1   8  -1    3.02    0.11
  -1   8  -1    2.99    0.12
  -1   8  -1    2.92    0.12
   1  -8   1    2.96    0.12
  -2   8  -1    4.69    0.18
  -2   8  -1    4.64    0.17
  -2   8  -1    4.82    0.18
   2  -8   1    4.37    0.18
   2  -8   1    4.70    0.18
  -3   8  -1    0.10    0.02
  -3   8  -1    0.14    0.02
  -3   8  -1    0.08    0.01
   3  -8   1    0.10    0.02
  -4   8  -1   12.28    0.43
  -4   8  -1   12.41    0.46
  -5   8  -1    0.67    0.07
  -5   8  -1    0.79    0.06
  -5   8  -1    0.80    0.05
  -5   8  -1    0.81    0.05
  -6   8  -1    0.53    0.05
  -6   8  -1    0.58    0.07
  -6   8  -1    0.58    0.05
  -6   8  -1    0.57    0.05
  -7   8  -1    1.03    0.06
  -7   8  -1    1.04    0.06
   7  -8   1    0.96    0.06
   7  -8   1    1.03    0.06
  -8   8  -1    1.76    0.06
  -8   8  -1    1.79    0.07
  -8   8  -1    1.70    0.07
   8  -8   1    1.81    0.07
   8   7  -1    5.34    0.16
  -8  -7   1    5.37    0.18
  -8  -7   1    5.21    0.18
  -8  -7   1    5.28    0.17
   7   7  -1    1.20    0.06
   7   7  -1    1.31    0.07
  -7  -7   1    1.24    0.07
  -7  -7   1    1.28    0.07
  -7  -7   1    1.29    0.08
  -7  -7   1    1.21    0.07
   6   7  -1    0.04    0.02
  -6  -7   1    0.10    0.03
  -6  -7   1    0.08    0.04
   5   7  -1    4.32    0.16
   5   7  -1    3.87    0.20
  -5  -7   1    4.45    0.17
   4   7  -1    0.02    0.02
   4   7  -1   -0.02    0.02
  -4  -7   1    0.00    0.02
   3   7  -1    3.21    0.12
   1   7  -1    0.28    0.02
   0   7  -1   27.24    0.98
   0   7  -1   26.56    0.97
   0   7  -1   25.83    0.98
  -1   7  -1    1.45    0.06
  -1   7  -1    1.50    0.06
  -1   7  -1    1.60    0.06
   1  -7   1    1.53    0.06
  -2   7  -1    3.61    0.14
  -2   7  -1    3.64    0.14
  -2   7  -1    3.62    0.14
   2  -7   1    3.62    0.14
   2  -7   1    3.41    0.14
  -3   7  -1   12.21    0.46
  -3   7  -1   11.90    0.46
  -3   7  -1   12.98    0.43
  -4   7  -1    1.34    0.06
  -4   7  -1    1.35    0.06
  -5   7  -1    1.82    0.10
  -5   7  -1    1.89    0.08
  -5   7  -1    1.90    0.09
  -5   7  -1    2.07    0.09
  -5   7  -1    1.99    0.09
  -6   7  -1    8.57    0.26
  -6   7  -1    8.34    0.25
  -6   7  -1    6.94    0.27
  -6   7  -1    7.13    0.26
  -6   7  -1    7.92    0.24
  -6   7  -1    8.07    0.29
  -7   7  -1    1.31    0.07
  -7   7  -1    1.46    0.07
   7  -7   1    1.23    0.07
   7  -7   1    1.69    0.07
  -8   7  -1   10.00    0.32
  -8   7  -1   10.14    0.30
   8  -7   1   10.02    0.30
  -9  -6   1    8.50    0.27
  -9  -6   1    8.79    0.27
   8   6  -1    0.04    0.02
  -8  -6   1    0.00    0.02
  -8  -6   1    0.04    0.02
  -8  -6   1    0.04    0.02
   7   6  -1    2.34    0.09
   7   6  -1    2.32    0.10
  -7  -6   1    2.40    0.10
  -7  -6   1    2.44    0.10
  -7  -6   1    2.42    0.11
  -7  -6   1    2.33    0.10
   6   6  -1    0.97    0.06
  -6  -6   1    1.12    0.07
  -6  -6   1    1.08    0.08
   5   6  -1    5.83    0.22
   5   6  -1    5.50    0.25
  -5  -6   1    5.84    0.22
  -5  -6   1    6.14    0.24
   4   6  -1    0.94    0.05
  -4  -6   1    0.90    0.05
   3   6  -1   28.82    0.97
  -3  -6   1   28.27    1.06
  -2  -6   1    0.30    0.02
   1   6  -1  153.66    5.59
   1   6  -1  147.58    5.60
  -1  -6   1  153.25    5.60
   0   6  -1    0.35    0.02
   0   6  -1    0.38    0.02
   0   6  -1    0.35    0.02
   0  -6   1    0.35    0.02
  -1   6  -1   10.53    0.38
  -1   6  -1    8.68    0.37
  -1   6  -1   10.56    0.38
   1  -6   1   10.71    0.38
  -2   6  -1    2.44    0.10
  -2   6  -1    2.53    0.10
  -2   6  -1    2.48    0.10
   2  -6   1    2.48    0.10
  -3   6  -1   13.25    0.49
  -3   6  -1   13.02    0.46
  -3   6  -1   13.26    0.49
  -4   6  -1   73.29    2.69
  -5   6  -1    1.18    0.06
  -5   6  -1    1.19    0.07
  -5   6  -1    1.11    0.10
  -5   6  -1    1.07    0.06
  -6   6  -1    0.50    0.04
  -6   6  -1    0.51    0.05
  -6   6  -1    0.71    0.07
  -6   6  -1    0.61    0.05
  -6   6  -1    0.61    0.07
  -6   6  -1    0.73    0.06
  -6   6  -1    0.53    0.07
  -7   6  -1   16.65    0.57
  -7   6  -1   16.27    0.49
  -7   6  -1   16.59    0.51
   7  -6   1   16.04    0.54
   7  -6   1   15.93    0.48
  -8   6  -1    4.22    0.14
  -8   6  -1    4.30    0.14
   8  -6   1    4.30    0.13
   8  -6   1    4.06    0.15
   9   5  -1    0.03    0.01
  -9  -5   1    0.01    0.01
  -9  -5   1    0.01    0.01
   8   5  -1    0.31    0.03
  -8  -5   1    0.29    0.04
  -8  -5   1    0.28    0.04
  -8  -5   1    0.26    0.04
  -8  -5   1    0.21    0.03
   7   5  -1    1.05    0.06
  -7  -5   1    1.11    0.07
  -7  -5   1    1.16    0.07
  -7  -5   1    1.14    0.06
   6   5  -1    0.93    0.06
  -6  -5   1    0.97    0.06
  -6  -5   1    1.04    0.07
   5   5  -1    0.29    0.05
   5   5  -1    0.27    0.03
  -5  -5   1    0.28    0.04
  -5  -5   1    0.25    0.03
   4   5  -1    8.03    0.29
  -4  -5   1    8.27    0.29
   3   5  -1    0.71    0.04
  -3  -5   1    0.70    0.04
  -3  -5   1    0.71    0.05
   2   5  -1    3.22    0.13
  -2  -5   1    3.30    0.13
   1   5  -1    4.38    0.16
   1   5  -1    4.19    0.16
  -1  -5   1    4.20    0.16
   0   5  -1    3.81    0.14
   0   5  -1    4.03    0.14
   0   5  -1    3.55    0.14
   0  -5   1    3.60    0.14
  -1   5  -1    1.37    0.06
  -1   5  -1    1.41    0.06
  -1   5  -1    1.36    0.06
   1  -5   1    1.39    0.06
  -2   5  -1    2.77    0.11
  -2   5  -1    2.99    0.11
  -2   5  -1    2.90    0.11
   2  -5   1    2.91    0.11
  -3   5  -1    3.98    0.15
  -3   5  -1    4.21    0.16
   3  -5   1    4.36    0.16
  -4   5  -1    1.97    0.08
  -4   5  -1    1.91    0.08
   4  -5   1    2.02    0.09
   4  -5   1    1.87    0.09
  -5   5  -1    0.83    0.05
  -5   5  -1    0.79    0.07
  -5   5  -1    0.82    0.05
  -6   5  -1    0.28    0.04
  -6   5  -1    0.17    0.03
  -6   5  -1    0.25    0.04
  -6   5  -1    0.24    0.03
  -6   5  -1    0.23    0.03
  -6   5  -1    0.32    0.05
  -7   5  -1    0.27    0.04
  -7   5  -1    0.23    0.03
  -7   5  -1    0.20    0.03
   7  -5   1    0.21    0.03
  -8   5  -1    0.71    0.04
  -8   5  -1    0.76    0.04
   8  -5   1    0.70    0.04
   9   4  -1    0.28    0.02
  -9  -4   1    0.32    0.03
  -9  -4   1    0.30    0.03
   8   4  -1    0.78    0.04
   8   4  -1    0.67    0.06
  -8  -4   1    0.78    0.05
  -8  -4   1    0.84    0.05
  -8  -4   1    0.89    0.05
  -8  -4   1    0.92    0.05
   7   4  -1    0.62    0.05
  -7  -4   1    0.59    0.06
  -7  -4   1    0.65    0.05
  -7  -4   1    0.62    0.05
   6   4  -1    4.89    0.18
  -6  -4   1    4.41    0.18
  -6  -4   1    4.59    0.20
  -6  -4   1    4.67    0.17
   5   4  -1    0.06    0.02
   5   4  -1    0.07    0.04
  -5  -4   1    0.06    0.02
  -5  -4   1    0.04    0.03
   4   4  -1    2.60    0.10
  -4  -4   1    2.29    0.10
   3   4  -1    1.36    0.06
  -3  -4   1    1.30    0.06
  -3  -4   1    1.29    0.06
   2   4  -1    0.01    0.01
  -2  -4   1    0.00    0.01
   1   4  -1  133.54    5.01
   1   4  -1  134.16    5.01
  -1  -4   1  139.23    5.02
  -1  -4   1  136.55    5.01
   0   4  -1    5.76    0.22
   0   4  -1    5.90    0.22
   0   4  -1    5.88    0.22
   0  -4   1    6.09    0.22
   0  -4   1    5.81    0.22
  -1   4  -1   69.87    2.54
  -1   4  -1   68.98    2.55
  -1   4  -1   69.78    2.55
   1  -4   1   67.60    2.55
  -2   4  -1   11.68    0.44
  -2   4  -1   11.83    0.44
  -2   4  -1   11.66    0.43
  -3   4  -1    0.25    0.03
  -3   4  -1    0.29    0.02
  -3   4  -1    0.27    0.03
   3  -4   1    0.25    0.02
  -4   4  -1    0.84    0.05
  -4   4  -1    0.85    0.05
   4  -4   1    0.83    0.05
   4  -4   1    0.82    0.05
  -5   4  -1    0.01    0.02
  -5   4  -1    0.04    0.02
   5  -4   1    0.05    0.03
  -6   4  -1    2.99    0.13
  -6   4  -1    3.17    0.12
  -6   4  -1    3.34    0.14
  -6   4  -1    3.27    0.12
  -7   4  -1    0.73    0.05
  -7   4  -1    0.71    0.05
  -7   4  -1    0.73    0.05
  -8   4  -1    0.19    0.02
  -8   4  -1    0.21    0.03
  -8   4  -1    0.21    0.03
  -8   4  -1    0.21    0.03
   8  -4   1    0.19    0.02
   9   3  -1    0.02    0.01
  -9  -3   1    0.05    0.01
  -9  -3   1    0.06    0.01
  -9  -3   1    0.06    0.01
   8   3  -1    0.18    0.03
   8   3  -1    0.26    0.03
  -8  -3   1    0.26    0.04
  -8  -3   1    0.18    0.03
  -8  -3   1    0.23    0.03
  -8  -3   1    0.19    0.03
  -7  -3   1    0.21    0.03
  -7  -3   1    0.31    0.04
  -7  -3   1    0.25    0.04
   6   3  -1   15.17    0.53
  -6  -3   1   15.24    0.54
  -6  -3   1   14.92    0.58
  -6  -3   1   15.31    0.48
   5   3  -1    1.43    0.07
  -5  -3   1    1.60    0.08
  -5  -3   1    1.42    0.08
   4   3  -1    3.21    0.12
  -4  -3   1    3.10    0.12
  -4  -3   1    3.15    0.13
   3   3  -1    3.10    0.12
   3   3  -1    2.97    0.11
  -3  -3   1    2.96    0.12
  -3  -3   1    3.06    0.12
   2   3  -1   23.33    0.89
  -2  -3   1   24.89    0.89
   1   3  -1    6.90    0.25
   1   3  -1    6.73    0.25
  -1  -3   1    6.82    0.25
  -1  -3   1    6.68    0.25
   0   3  -1    0.66    0.03
   0   3  -1    0.70    0.03
   0   3  -1    0.63    0.03
   0  -3   1    0.64    0.03
   0  -3   1    0.64    0.03
  -1   3  -1    4.86    0.19
  -1   3  -1    5.08    0.19
  -1   3  -1    5.20    0.19
   1  -3   1    5.10    0.19
  -2   3  -1   18.35    0.70
  -2   3  -1   19.07    0.70
  -2   3  -1   18.91    0.70
   2  -3   1   19.45    0.70
  -3   3  -1   32.35    1.24
  -3   3  -1   33.12    1.14
  -3   3  -1   34.06    1.23
   3  -3   1   34.20    1.23
  -4   3  -1    5.65    0.22
   4  -3   1    5.36    0.20
   4  -3   1    5.82    0.22
  -5   3  -1    9.57    0.35
  -5   3  -1   10.32    0.38
   5  -3   1    9.71    0.35
  -6   3  -1    2.69    0.12
  -6   3  -1    3.02    0.11
  -6   3  -1    2.93    0.13
  -6   3  -1    2.94    0.12
   6  -3   1    2.81    0.12
  -7   3  -1    1.91    0.09
  -7   3  -1    2.03    0.09
  -7   3  -1    1.96    0.08
  -8   3  -1    0.08    0.02
  -8   3  -1    0.07    0.02
  -8   3  -1    0.06    0.02
   8  -3   1    0.07    0.02
   8  -3   1    0.14    0.04
  -9  -2   1    0.02    0.01
  -9  -2   1    0.02    0.01
  -9  -2   1    0.01    0.01
   8   2  -1    1.28    0.06
  -8  -2   1    1.19    0.06
  -8  -2   1    1.28    0.06
  -8  -2   1    1.27    0.06
   7   2  -1    2.73    0.12
  -7  -2   1    2.87    0.11
  -7  -2   1    2.92    0.13
   6   2  -1    1.31    0.07
  -6  -2   1    1.33    0.08
  -6  -2   1    1.33    0.08
  -6  -2   1    1.36    0.07
   5   2  -1    6.94    0.25
  -5  -2   1    7.03    0.26
  -5  -2   1    6.98    0.27
   4   2  -1    9.18    0.32
  -4  -2   1    9.32    0.35
  -4  -2   1    8.55    0.35
  -4  -2   1    9.47    0.33
   3   2  -1    3.12    0.13
  -3  -2   1    3.22    0.12
  -3  -2   1    3.21    0.13
   2   2  -1    4.10    0.15
  -2  -2   1    3.81    0.15
  -2  -2   1    3.95    0.15
   1   2  -1    2.41    0.09
   1   2  -1    2.44    0.09
  -1  -2   1    2.37    0.09
  -1  -2   1    2.31    0.09
   0   2  -1    0.73    0.03
   0   2  -1    0.69    0.03
   0  -2   1    0.76    0.03
   0  -2   1    0.76    0.03
  -1   2  -1   48.25    1.84
  -1   2  -1   50.24    1.84
  -1   2  -1   50.21    1.85
   1  -2   1   49.86    1.85
   1  -2   1   51.39    1.85
  -2   2  -1   28.26    1.03
  -2   2  -1   27.90    1.03
  -2   2  -1   27.19    1.02
   2  -2   1   27.89    1.03
  -3   2  -1    8.83    0.32
  -3   2  -1    8.15    0.32
   3  -2   1    8.64    0.32
  -4   2  -1    5.45    0.21
   4  -2   1    5.50    0.20
  -5   2  -1   18.82    0.70
  -6   2  -1    0.18    0.03
  -6   2  -1    0.17    0.04
  -6   2  -1    0.18    0.03
   6  -2   1    0.14    0.03
  -7   2  -1    1.82    0.08
  -7   2  -1    1.95    0.09
  -7   2  -1    1.81    0.08
  -7   2  -1    2.02    0.08
  -8   2  -1    0.67    0.04
  -8   2  -1    0.68    0.04
   8  -2   1    0.67    0.04
   9   1  -1    1.50    0.05
  -9  -1   1    1.52    0.06
  -9  -1   1    1.55    0.06
  -9  -1   1    1.52    0.06
   8   1  -1    1.53    0.07
   8   1  -1    1.44    0.08
  -8  -1   1    1.57    0.07
  -8  -1   1    1.61    0.07
  -8  -1   1    1.57    0.07
   7   1  -1    1.75    0.09
  -7  -1   1    1.82    0.08
  -7  -1   1    1.73    0.08
  -7  -1   1    1.75    0.09
  -7  -1   1    1.72    0.11
   6   1  -1   12.15    0.42
  -6  -1   1   11.81    0.38
  -6  -1   1   11.75    0.46
  -6  -1   1   12.40    0.43
  -6  -1   1   11.43    0.36
  -6  -1   1   11.94    0.39
   5   1  -1   16.83    0.58
  -5  -1   1   16.64    0.58
  -5  -1   1   16.17    0.62
   4   1  -1    2.61    0.10
  -4  -1   1    2.62    0.11
  -4  -1   1    2.62    0.11
  -4  -1   1    2.62    0.12
   3   1  -1    3.46    0.13
   3   1  -1    3.73    0.14
  -3  -1   1    3.31    0.13
  -3  -1   1    3.37    0.14
  -3  -1   1    3.58    0.14
   2   1  -1   93.75    3.53
  -2  -1   1  100.78    3.54
  -2  -1   1   92.96    3.54
   1   1  -1    5.34    0.20
   1   1  -1    5.27    0.20
  -1  -1   1    5.17    0.20
  -1  -1   1    5.48    0.20
  -1   1  -1   10.90    0.42
  -1   1  -1   11.67    0.42
  -1   1  -1   11.87    0.42
   1  -1   1   11.07    0.42
   1  -1   1   11.26    0.42
  -2   1  -1   19.47    0.70
  -2   1  -1   18.11    0.70
  -2   1  -1   19.47    0.70
   2  -1   1   18.77    0.70
  -3   1  -1    0.11    0.02
  -3   1  -1    0.12    0.02
   3  -1   1    0.13    0.02
   3  -1   1    0.13    0.02
  -4   1  -1    3.43    0.16
  -4   1  -1    3.55    0.14
   4  -1   1    3.53    0.13
  -5   1  -1   23.26    0.81
  -5   1  -1   23.71    0.86
   5  -1   1   22.73    0.80
  -6   1  -1    0.27    0.04
  -6   1  -1    0.29    0.04
  -6   1  -1    0.17    0.03
  -6   1  -1    0.18    0.03
   6  -1   1    0.27    0.03
  -7   1  -1    0.05    0.02
  -7   1  -1    0.08    0.03
  -7   1  -1    0.03    0.02
  -7   1  -1    0.05    0.03
   7  -1   1    0.03    0.02
  -8   1  -1    0.01    0.02
  -8   1  -1    0.00    0.02
   8  -1   1    0.02    0.02
   9  -1   1    0.13    0.02
   8   0  -1    0.03    0.02
  -8   0   1    0.04    0.02
  -8   0   1    0.02    0.02
  -8   0   1    0.11    0.03
   7   0  -1    0.02    0.03
  -7   0   1   -0.01    0.05
  -7   0   1    0.01    0.02
  -7   0   1    0.05    0.03
   6   0  -1    0.01    0.03
  -6   0   1    0.09    0.04
  -6   0   1   -0.01    0.03
  -6   0   1   -0.03    0.04
  -6   0   1    0.00    0.02
   5   0  -1    0.02    0.02
  -5   0   1    0.03    0.02
  -5   0   1   -0.01    0.02
   4   0  -1   -0.02    0.02
  -4   0   1    0.02    0.03
  -4   0   1    0.00    0.02
  -4   0   1    0.01    0.02
   3   0  -1   -0.01    0.02
   3   0  -1   -0.01    0.01
  -3   0   1    0.01    0.01
  -3   0   1    0.00    0.02
  -3   0   1   -0.01    0.01
   2   0  -1    0.00    0.01
  -2   0   1    0.01    0.01
   1   0  -1    0.01    0.00
   1   0  -1    0.01    0.00
  -1   0   1    0.02    0.00
   0   0  -1   -0.10    0.00
  -1   0  -1   -0.03    0.00
   1   0   1   -0.03    0.00
   1   0   1   -0.03    0.00
  -2   0  -1   -0.05    0.01
  -2   0  -1   -0.03    0.01
  -2   0  -1   -0.05    0.01
   2   0   1   -0.05    0.01
  -3   0  -1    0.01    0.02
  -3   0  -1    0.00    0.01
   3   0   1    0.00    0.01
   3   0   1    0.01    0.02
   4   0   1   -0.03    0.02
  -5   0  -1    1.51    0.08
  -6   0  -1    0.03    0.03
  -6   0  -1   -0.01    0.02
  -6   0  -1    0.00    0.04
   6   0   1    0.08    0.03
  -7   0  -1    0.01    0.02
  -7   0  -1    0.03    0.02
  -7   0  -1    0.00    0.03
   7   0   1    0.01    0.02
  -8   0  -1    0.02    0.02
  -8   0  -1    0.01    0.02
   8   0   1   -0.01    0.02
  -9   0  -1    0.01    0.01
   9   0   1    0.02    0.01
   9  -1  -1    1.48    0.05
  -9   1   1    1.55    0.06
  -9   1   1    1.52    0.06
  -9   1   1    1.50    0.06
   8  -1  -1    1.53    0.08
   8  -1  -1    1.67    0.07
  -8   1   1    1.63    0.07
  -8   1   1    1.62    0.07
   7  -1  -1    1.86    0.09
  -7   1   1    1.81    0.08
  -7   1   1    1.79    0.09
  -7   1   1    1.68    0.11
  -7   1   1    1.75    0.08
   6  -1  -1   11.86    0.42
  -6   1   1   11.94    0.39
  -6   1   1   11.49    0.38
  -6   1   1   12.19    0.46
  -6   1   1   12.18    0.43
  -6   1   1   12.54    0.37
   5  -1  -1   16.15    0.57
  -5   1   1   16.42    0.57
  -5   1   1   16.65    0.62
   4  -1  -1    2.64    0.11
   4  -1  -1    2.58    0.11
  -4   1   1    2.62    0.12
  -4   1   1    2.80    0.11
  -4   1   1    2.74    0.11
   3  -1  -1    3.70    0.14
   3  -1  -1    3.38    0.13
  -3   1   1    3.49    0.13
  -3   1   1    3.50    0.14
  -3   1   1    3.53    0.14
   2  -1  -1   94.87    3.40
  -2   1   1   98.21    3.41
  -2   1   1   97.69    3.41
  -2   1   1   78.28    3.38
   1  -1  -1    5.29    0.19
   1  -1  -1    5.25    0.19
  -1   1   1    5.01    0.19
  -1   1   1    5.13    0.19
  -1   1   1    5.27    0.19
  -1  -1  -1   10.80    0.41
  -1  -1  -1   10.80    0.41
   1   1   1   11.77    0.41
   1   1   1   10.45    0.41
  -2  -1  -1   17.87    0.67
  -2  -1  -1   18.44    0.67
   2   1   1   18.07    0.67
  -3  -1  -1    0.11    0.02
  -3  -1  -1    0.11    0.02
   3   1   1    0.13    0.02
   3   1   1    0.15    0.02
  -4  -1  -1    3.65    0.15
   4   1   1    3.61    0.14
  -5  -1  -1   23.86    0.86
  -5  -1  -1   22.34    0.80
   5   1   1   22.82    0.79
  -6  -1  -1    0.20    0.03
  -6  -1  -1    0.28    0.05
  -6  -1  -1    0.22    0.04
   6   1   1    0.24    0.03
  -7  -1  -1    0.04    0.03
  -7  -1  -1    0.01    0.02
  -7  -1  -1    0.05    0.03
   7   1   1    0.07    0.03
   7   1   1    0.04    0.03
  -8  -1  -1    0.02    0.02
  -8  -1  -1    0.03    0.02
  -8  -1  -1    0.02    0.02
   8   1   1    0.06    0.02
   9   1   1    0.06    0.01
   9  -2  -1    0.02    0.01
  -9   2   1    0.02    0.01
  -9   2   1   -0.01    0.01
   8  -2  -1    1.23    0.06
   8  -2  -1    1.18    0.07
  -8   2   1    1.33    0.06
  -8   2   1    1.27    0.06
  -7   2   1    2.68    0.10
  -7   2   1    2.81    0.11
  -7   2   1    2.66    0.12
   6  -2  -1    1.34    0.07
  -6   2   1    1.27    0.07
  -6   2   1    1.25    0.07
  -6   2   1    1.29    0.07
   5  -2  -1    6.67    0.25
  -5   2   1    6.93    0.25
  -5   2   1    7.03    0.27
   4  -2  -1    8.87    0.31
  -4   2   1    9.02    0.31
  -4   2   1    8.63    0.34
  -4   2   1    8.84    0.34
   3  -2  -1    3.13    0.12
   3  -2  -1    3.30    0.12
  -3   2   1    3.08    0.13
  -3   2   1    3.16    0.13
  -3   2   1    3.35    0.13
  -3   2   1    3.21    0.12
   2  -2  -1    3.99    0.15
  -2   2   1    3.95    0.15
  -2   2   1    3.97    0.15
  -2   2   1    3.87    0.15
   1  -2  -1    2.54    0.09
   1  -2  -1    2.51    0.09
  -1   2   1    2.41    0.09
   0  -2  -1    0.74    0.03
   0  -2  -1    0.73    0.03
   0   2   1    0.73    0.03
   0   2   1    0.73    0.03
  -1  -2  -1   47.88    1.77
  -1  -2  -1   47.62    1.76
   1   2   1   49.12    1.76
   1   2   1   46.01    1.76
  -2  -2  -1   27.83    1.03
   2   2   1   27.69    1.03
  -3  -2  -1    8.27    0.32
   3   2   1    8.39    0.29
   3   2   1    8.46    0.32
  -4  -2  -1    5.73    0.22
   4   2   1    5.58    0.20
  -5  -2  -1   19.76    0.72
  -5  -2  -1   18.81    0.67
   5   2   1   19.22    0.67
  -6  -2  -1    0.15    0.03
  -6  -2  -1    0.18    0.05
  -6  -2  -1    0.13    0.03
  -6  -2  -1    0.23    0.04
   6   2   1    0.20    0.03
  -7  -2  -1    1.96    0.10
  -7  -2  -1    1.93    0.08
  -7  -2  -1    1.91    0.08
   7   2   1    1.85    0.08
  -8  -2  -1    0.67    0.04
  -8  -2  -1    0.69    0.04
   8   2   1    0.66    0.04
   9  -3  -1    0.02    0.01
  -9   3   1    0.05    0.01
  -9   3   1    0.02    0.01
  -9   3   1    0.07    0.02
   8  -3  -1    0.19    0.04
   8  -3  -1    0.29    0.03
  -8   3   1    0.21    0.02
  -8   3   1    0.18    0.02
  -7   3   1    0.21    0.03
  -7   3   1    0.24    0.03
  -7   3   1    0.27    0.04
   6  -3  -1   14.53    0.52
  -6   3   1   14.94    0.48
  -6   3   1   15.12    0.57
  -6   3   1   15.30    0.48
   5  -3  -1    1.36    0.07
  -5   3   1    1.47    0.07
  -5   3   1    1.50    0.07
   4  -3  -1    3.13    0.12
  -4   3   1    3.25    0.12
  -4   3   1    3.25    0.13
   3  -3  -1    3.23    0.12
  -3   3   1    3.11    0.12
  -3   3   1    3.19    0.13
  -3   3   1    3.03    0.12
  -3   3   1    3.28    0.12
   2  -3  -1   24.98    0.88
  -2   3   1   24.15    0.88
  -2   3   1   22.97    0.88
  -2   3   1   23.80    0.89
   1  -3  -1    6.72    0.25
   1  -3  -1    6.70    0.25
  -1   3   1    6.89    0.25
   0  -3  -1    0.65    0.03
   0  -3  -1    0.64    0.03
   0   3   1    0.65    0.03
   0   3   1    0.66    0.03
   0   3   1    0.62    0.03
  -1  -3  -1    4.95    0.18
  -1  -3  -1    4.84    0.18
   1   3   1    4.79    0.18
   1   3   1    4.88    0.18
  -2  -3  -1   19.45    0.69
   2   3   1   17.89    0.69
  -3  -3  -1   31.89    1.19
   3   3   1   32.56    1.10
  -4  -3  -1    5.50    0.22
   4   3   1    5.68    0.20
  -5  -3  -1   10.09    0.39
  -5  -3  -1   10.30    0.37
   5   3   1   10.10    0.36
  -6  -3  -1    2.80    0.11
  -6  -3  -1    3.07    0.13
  -6  -3  -1    2.95    0.14
   6   3   1    2.91    0.12
  -7  -3  -1    1.99    0.09
  -7  -3  -1    1.91    0.08
  -7  -3  -1    2.05    0.10
   7   3   1    2.02    0.09
   7   3   1    1.99    0.08
  -8  -3  -1    0.08    0.02
  -8  -3  -1    0.07    0.02
  -8  -3  -1    0.07    0.02
   8   3   1    0.12    0.04
   8   3   1    0.11    0.02
   9  -4  -1    0.33    0.02
  -9   4   1    0.28    0.02
  -9   4   1    0.32    0.02
   8  -4  -1    0.84    0.05
  -8   4   1    0.86    0.05
  -8   4   1    0.83    0.05
  -8   4   1    0.90    0.05
  -7   4   1    0.59    0.07
  -7   4   1    0.62    0.05
  -7   4   1    0.72    0.05
  -7   4   1    0.66    0.05
  -7   4   1    0.62    0.05
   6  -4  -1    4.54    0.18
  -6   4   1    4.57    0.15
  -6   4   1    4.77    0.18
  -6   4   1    4.70    0.17
  -6   4   1    4.67    0.16
  -6   4   1    4.62    0.19
  -5   4   1    0.03    0.02
  -5   4   1    0.05    0.02
   4  -4  -1    2.77    0.11
  -4   4   1    2.94    0.11
  -4   4   1    2.41    0.11
   3  -4  -1    1.40    0.06
   3  -4  -1    1.27    0.06
  -3   4   1    1.27    0.06
  -3   4   1    1.39    0.06
  -3   4   1    1.34    0.06
   2  -4  -1    0.02    0.01
   2  -4  -1    0.02    0.01
  -2   4   1    0.04    0.01
  -2   4   1    0.01    0.00
  -2   4   1    0.02    0.01
   1  -4  -1  120.46    4.52
  -1   4   1  125.77    4.52
   0  -4  -1    5.84    0.22
   0  -4  -1    5.90    0.22
   0   4   1    5.87    0.22
   0   4   1    5.77    0.22
   0   4   1    5.75    0.22
  -1  -4  -1   67.89    2.54
  -1  -4  -1   68.76    2.52
   1   4   1   69.40    2.54
   1   4   1   67.90    2.53
  -2  -4  -1   12.26    0.46
   2   4   1   12.32    0.46
  -3  -4  -1    0.21    0.03
  -3  -4  -1    0.24    0.03
   3   4   1    0.24    0.02
  -4  -4  -1    1.08    0.05
   4   4   1    0.81    0.05
  -5  -4  -1    0.06    0.03
  -5  -4  -1    0.06    0.03
   5   4   1    0.02    0.02
   5   4   1   -0.06    0.05
  -6  -4  -1    3.26    0.13
  -6  -4  -1    3.36    0.15
  -6  -4  -1    3.22    0.14
   6   4   1    3.27    0.13
  -7  -4  -1    0.72    0.06
  -7  -4  -1    0.74    0.05
  -7  -4  -1    0.78    0.06
   7   4   1    0.74    0.05
   7   4   1    0.66    0.05
  -8  -4  -1    0.17    0.02
  -8  -4  -1    0.18    0.02
  -8  -4  -1    0.16    0.02
   8   4   1    0.20    0.04
   8   4   1    0.23    0.03
   9  -5  -1    0.04    0.01
  -9   5   1    0.02    0.01
  -9   5   1    0.02    0.01
   8  -5  -1    0.27    0.03
   8  -5  -1    0.32    0.03
  -8   5   1    0.31    0.03
  -8   5   1    0.28    0.03
  -8   5   1    0.32    0.04
  -7   5   1    1.15    0.06
  -7   5   1    1.08    0.06
  -7   5   1    1.18    0.06
  -7   5   1    1.13    0.07
   6  -5  -1    0.88    0.07
  -6   5   1    0.97    0.06
  -6   5   1    0.96    0.06
  -6   5   1    0.87    0.06
  -6   5   1    0.90    0.07
   5  -5  -1    0.25    0.04
  -5   5   1    0.27    0.03
  -5   5   1    0.21    0.03
   4  -5  -1    7.58    0.30
   4  -5  -1    7.82    0.28
  -4   5   1    8.04    0.30
  -4   5   1    7.69    0.28
  -4   5   1    8.16    0.30
   3  -5  -1    0.70    0.04
   3  -5  -1    0.71    0.03
  -3   5   1    0.71    0.04
  -3   5   1    0.71    0.04
  -3   5   1    0.67    0.04
   2  -5  -1    3.18    0.12
   2  -5  -1    3.30    0.12
  -2   5   1    3.29    0.12
  -2   5   1    3.35    0.13
  -2   5   1    3.19    0.12
   1  -5  -1    4.27    0.16
   1  -5  -1    4.51    0.16
  -1   5   1    4.38    0.16
  -1   5   1    4.00    0.16
   0  -5  -1    3.68    0.14
   0  -5  -1    3.81    0.14
   0   5   1    3.67    0.14
   0   5   1    3.74    0.14
   0   5   1    3.84    0.14
  -1  -5  -1    1.38    0.06
   1   5   1    1.46    0.06
   1   5   1    1.38    0.06
  -2  -5  -1    2.77    0.11
  -3  -5  -1    3.87    0.15
   3   5   1    3.93    0.14
  -4  -5  -1    1.96    0.09
   4   5   1    2.04    0.10
   4   5   1    1.98    0.08
  -5  -5  -1    0.79    0.06
  -5  -5  -1    0.82    0.06
   5   5   1    0.82    0.05
   5   5   1    0.71    0.10
   5   5   1    0.75    0.07
  -6  -5  -1    0.19    0.04
  -6  -5  -1    0.26    0.04
  -6  -5  -1    0.35    0.05
  -6  -5  -1    0.33    0.06
   6   5   1    0.27    0.04
  -7  -5  -1    0.27    0.03
  -7  -5  -1    0.27    0.04
  -7  -5  -1    0.17    0.03
  -7  -5  -1    0.24    0.03
   7   5   1    0.19    0.03
   7   5   1    0.27    0.03
  -8  -5  -1    0.75    0.04
  -8  -5  -1    0.68    0.04
  -8  -5  -1    0.71    0.05
   8   5   1    0.69    0.04
   9  -6  -1    8.53    0.25
  -9   6   1    8.44    0.26
  -9   6   1    8.19    0.25
   8  -6  -1    0.01    0.03
   8  -6  -1    0.01    0.02
  -8   6   1    0.04    0.02
  -8   6   1    0.02    0.01
  -7   6   1    2.42    0.09
  -7   6   1    2.39    0.10
  -7   6   1    2.39    0.10
  -7   6   1    2.39    0.09
  -7   6   1    2.25    0.11
  -7   6   1    2.34    0.09
  -6   6   1    1.10    0.06
  -6   6   1    1.17    0.07
   5  -6  -1    5.78    0.21
  -5   6   1    5.60    0.22
  -5   6   1    5.63    0.18
  -5   6   1    5.49    0.21
   4  -6  -1    0.85    0.06
  -4   6   1    0.96    0.05
  -4   6   1    1.01    0.05
  -4   6   1    1.00    0.05
   3  -6  -1   28.23    1.04
   3  -6  -1   28.63    1.04
  -3   6   1   28.27    1.04
  -3   6   1   27.62    1.04
   2  -6  -1    0.30    0.02
   2  -6  -1    0.29    0.02
  -2   6   1    0.28    0.02
  -2   6   1    0.30    0.02
   1  -6  -1  149.87    5.34
   1  -6  -1  143.39    5.34
  -1   6   1  142.81    5.34
  -1   6   1  145.44    5.34
   0  -6  -1    0.35    0.02
   0  -6  -1    0.34    0.02
   0   6   1    0.36    0.02
   0   6   1    0.35    0.02
  -1  -6  -1   10.66    0.39
   1   6   1   10.16    0.39
   1   6   1   10.41    0.39
  -2  -6  -1    2.39    0.09
  -2  -6  -1    2.38    0.10
   2   6   1    2.40    0.10
  -3  -6  -1   12.87    0.45
   3   6   1   12.85    0.45
  -4  -6  -1   73.09    2.41
   4   6   1   68.06    2.61
   4   6   1   70.65    2.40
  -5  -6  -1    0.91    0.06
  -5  -6  -1    0.88    0.06
   5   6   1    0.90    0.05
   5   6   1    0.65    0.10
  -6  -6  -1    0.47    0.06
  -6  -6  -1    0.58    0.05
  -6  -6  -1    0.57    0.06
   6   6   1    0.55    0.04
   6   6   1    0.58    0.05
  -7  -6  -1   16.00    0.50
  -7  -6  -1   16.52    0.50
  -7  -6  -1   16.21    0.57
   7   6   1   15.59    0.47
  -8  -6  -1    4.08    0.14
  -8  -6  -1    4.07    0.13
   8   6   1    3.80    0.15
   8   6   1    4.04    0.13
   8  -7  -1    5.32    0.16
   8  -7  -1    5.05    0.19
  -8   7   1    5.37    0.17
  -8   7   1    5.27    0.17
  -7   7   1    1.22    0.07
  -7   7   1    1.28    0.06
  -7   7   1    1.30    0.06
  -7   7   1    1.29    0.06
  -6   7   1    0.06    0.03
  -6   7   1    0.12    0.03
  -6   7   1    0.03    0.02
   5  -7  -1    4.03    0.16
  -5   7   1    3.97    0.16
  -5   7   1    4.20    0.14
  -5   7   1    4.42    0.17
   3  -7  -1    2.68    0.10
   3  -7  -1    2.50    0.10
  -3   7   1    2.83    0.10
  -3   7   1    2.62    0.11
  -3   7   1    2.62    0.11
   2  -7  -1    0.19    0.01
   2  -7  -1    0.17    0.01
  -2   7   1    0.15    0.02
   1  -7  -1    0.29    0.01
   1  -7  -1    0.31    0.01
  -1   7   1    0.31    0.01
  -1   7   1    0.29    0.02
   0  -7  -1   25.61    0.97
   0   7   1   25.70    0.96
   0   7   1   27.06    0.96
   0   7   1   26.31    0.97
  -1  -7  -1    1.51    0.06
   1   7   1    1.49    0.07
   1   7   1    1.52    0.06
  -2  -7  -1    3.47    0.14
   2   7   1    3.37    0.12
   2   7   1    3.35    0.14
  -3  -7  -1   12.65    0.44
   3   7   1   12.72    0.44
  -4  -7  -1    1.30    0.07
   4   7   1    1.33    0.06
  -5  -7  -1    1.95    0.10
  -5  -7  -1    1.86    0.10
   5   7   1    2.13    0.09
  -6  -7  -1    8.56    0.28
  -6  -7  -1    8.82    0.32
   6   7   1    8.66    0.27
   6   7   1    8.64    0.31
  -7  -7  -1    1.14    0.06
  -7  -7  -1    1.12    0.07
   7   7   1    1.14    0.06
   7   7   1    1.05    0.06
  -8  -7  -1    9.91    0.30
  -8  -7  -1   10.05    0.30
   8   7   1    9.11    0.34
   8  -8  -1    0.76    0.05
   8  -8  -1    0.79    0.04
  -8   8   1    0.70    0.04
  -8   8   1    0.78    0.04
  -7   8   1    1.28    0.06
  -7   8   1    1.31    0.06
  -7   8   1    1.35    0.07
  -7   8   1    1.28    0.06
  -7   8   1    1.31    0.06
  -6   8   1    3.08    0.13
  -6   8   1    2.71    0.12
  -6   8   1    3.10    0.11
  -5   8   1    0.65    0.04
  -5   8   1    0.53    0.04
  -5   8   1    0.44    0.05
  -4   8   1   25.59    0.96
  -4   8   1   25.50    0.90
  -4   8   1   27.14    0.97
   3  -8  -1    0.41    0.02
   3  -8  -1    0.38    0.03
  -3   8   1    0.46    0.03
  -3   8   1    0.41    0.03
   2  -8  -1   25.52    0.92
   2  -8  -1   26.01    0.92
  -2   8   1   24.18    0.85
  -2   8   1   24.21    0.92
   1  -8  -1    9.10    0.33
   1  -8  -1    8.54    0.33
  -1   8   1    9.08    0.33
  -1   8   1    8.90    0.33
  -1  -8  -1    2.96    0.12
   1   8   1    3.01    0.12
  -2  -8  -1    5.24    0.18
   2   8   1    4.27    0.18
   2   8   1    4.32    0.16
  -4  -8  -1   12.09    0.44
   4   8   1   12.55    0.43
  -5  -8  -1    0.83    0.07
  -5  -8  -1    0.74    0.06
   5   8   1    0.78    0.05
   5   8   1    0.80    0.06
  -6  -8  -1    0.61    0.06
  -6  -8  -1    0.59    0.06
   6   8   1    0.62    0.05
   6   8   1    0.62    0.05
  -7  -8  -1    0.95    0.07
  -7  -8  -1    1.10    0.06
   7   8   1    1.04    0.06
   7   8   1    1.04    0.05
  -8  -8  -1    1.74    0.07
  -8  -8  -1    1.79    0.07
   8   8   1    1.71    0.06
   8  -9  -1    0.01    0.02
  -8   9   1    0.04    0.02
  -8   9   1    0.01    0.01
  -8   9   1    0.01    0.01
  -7   9   1    0.99    0.05
  -7   9   1    1.03    0.05
  -7   9   1    0.99    0.05
  -7   9   1    1.08    0.06
  -7   9   1    0.99    0.06
  -6   9   1    0.11    0.03
  -6   9   1    0.13    0.03
  -6   9   1    0.16    0.03
  -5   9   1    4.47    0.17
  -5   9   1    4.09    0.17
  -5   9   1    4.24    0.16
  -5   9   1    4.25    0.14
  -4   9   1    6.77    0.23
  -4   9   1    6.26    0.24
  -4   9   1    5.96    0.24
  -3   9   1    0.47    0.03
  -2   9   1    2.35    0.09
  -2   9   1    2.35    0.09
  -2   9   1    2.42    0.10
   1  -9  -1    2.13    0.08
   1  -9  -1    2.13    0.08
  -1   9   1    2.15    0.08
  -1   9   1    2.16    0.09
   0  -9  -1   24.63    0.91
   0   9   1   24.21    0.91
   0   9   1   25.24    0.91
   0   9   1   24.46    0.91
  -1  -9  -1    1.52    0.06
   1   9   1    1.44    0.07
  -2  -9  -1   17.92    0.62
   2   9   1   18.48    0.62
   2   9   1   17.90    0.68
   3   9   1   19.74    0.68
  -4  -9  -1    2.64    0.11
   4   9   1    2.53    0.10
  -5  -9  -1    2.03    0.10
   5   9   1    2.09    0.09
   5   9   1    1.88    0.09
  -6  -9  -1    1.30    0.07
  -6  -9  -1    1.07    0.07
   6   9   1    1.30    0.06
   6   9   1    1.23    0.06
  -7  -9  -1    2.65    0.10
  -7  -9  -1    2.55    0.10
  -7  -9  -1    2.52    0.12
   7   9   1    2.59    0.11
  -8  -9  -1    0.67    0.04
  -8  -9  -1    0.68    0.04
   8   9   1    0.66    0.04
   8 -10  -1    0.35    0.03
  -8  10   1    0.42    0.03
  -8  10   1    0.39    0.03
  -8  10   1    0.39    0.03
  -7  10   1    1.00    0.05
  -7  10   1    0.92    0.05
  -7  10   1    0.93    0.05
  -7  10   1    0.88    0.05
  -6  10   1    2.46    0.12
  -6  10   1    2.46    0.10
  -6  10   1    2.34    0.09
  -6  10   1    2.40    0.09
  -6  10   1    2.40    0.12
  -6  10   1    2.38    0.09
  -5  10   1    0.11    0.05
  -5  10   1    0.10    0.03
  -5  10   1    0.05    0.02
  -5  10   1    0.05    0.02
  -4  10   1   12.94    0.48
  -4  10   1   13.03    0.45
  -4  10   1   12.31    0.47
  -3  10   1    0.19    0.02
  -3  10   1    0.16    0.02
  -3  10   1    0.21    0.03
  -2  10   1   34.33    1.16
  -2  10   1   34.91    1.29
  -2  10   1   36.17    1.29
   1 -10  -1    6.77    0.26
   1 -10  -1    6.93    0.26
  -1  10   1    7.07    0.26
  -1  10   1    6.81    0.26
  -1  10   1    6.99    0.26
   0 -10  -1    3.98    0.15
   0 -10  -1    3.83    0.15
   0  10   1    3.78    0.14
   0  10   1    3.85    0.15
   0  10   1    3.93    0.15
   0  10   1    4.01    0.15
  -1 -10  -1    0.42    0.03
   1  10   1    0.32    0.03
   1  10   1    0.30    0.03
  -2 -10  -1    6.17    0.23
   2  10   1    6.31    0.25
   2  10   1    6.41    0.22
   3  10   1   19.30    0.66
  -4 -10  -1    0.05    0.02
   4  10   1    0.06    0.02
  -5 -10  -1    0.18    0.04
   5  10   1    0.20    0.04
  -6 -10  -1    2.39    0.10
  -6 -10  -1    2.44    0.12
   6  10   1    2.36    0.10
   6  10   1    2.43    0.10
   6  10   1    2.41    0.09
  -7 -10  -1    3.57    0.15
  -7 -10  -1    3.55    0.14
  -7 -10  -1    3.53    0.13
  -7 -10  -1    3.55    0.13
   7  10   1    3.60    0.12
  -8 -10  -1   -0.02    0.02
  -8 -10  -1    0.01    0.01
   8 -11  -1    2.87    0.09
  -8  11   1    2.82    0.10
  -8  11   1    2.95    0.10
  -8  11   1    2.91    0.10
  -7  11   1    0.76    0.05
  -7  11   1    0.82    0.04
  -7  11   1    0.80    0.05
  -6  11   1    2.52    0.11
  -6  11   1    2.29    0.09
  -6  11   1    2.26    0.09
  -6  11   1    2.32    0.10
  -6  11   1    2.46    0.09
  -6  11   1    2.48    0.09
  -6  11   1    2.17    0.11
  -5  11   1    0.05    0.05
  -5  11   1    0.02    0.02
  -5  11   1    0.02    0.02
  -5  11   1    0.01    0.03
  -4  11   1   28.83    1.08
  -4  11   1   29.19    1.08
  -4  11   1   29.55    1.00
  -3  11   1   40.75    1.47
  -3  11   1   38.67    1.31
  -3  11   1   40.48    1.47
  -2  11   1   29.12    1.10
  -2  11   1   30.66    1.10
   1 -11  -1   34.20    1.26
   1 -11  -1   35.20    1.26
  -1  11   1   35.01    1.26
  -1  11   1   34.52    1.26
  -1  11   1   34.45    1.26
  -1  11   1   31.72    1.12
   0 -11  -1   48.98    1.78
   0 -11  -1   47.93    1.77
   0  11   1   47.02    1.77
   0  11   1   48.89    1.78
  -1 -11  -1    1.18    0.06
   1  11   1    1.20    0.05
   1  11   1    1.26    0.06
  -2 -11  -1   10.30    0.36
   2  11   1    9.64    0.39
   2  11   1   10.39    0.35
  -3 -11  -1    0.02    0.03
  -3 -11  -1    0.02    0.02
   3  11   1    0.02    0.02
  -4 -11  -1    1.32    0.07
   4  11   1    1.20    0.06
  -5 -11  -1    0.08    0.03
   5  11   1    0.12    0.04
   5  11   1    0.06    0.02
  -6 -11  -1    0.15    0.04
  -6 -11  -1    0.15    0.03
  -6 -11  -1    0.17    0.03
   6  11   1    0.16    0.03
   6  11   1    0.17    0.03
  -7 -11  -1   16.70    0.53
  -7 -11  -1   17.29    0.51
  -7 -11  -1   16.44    0.52
   7  11   1   16.74    0.49
  -8 -11  -1    2.04    0.07
  -8 -11  -1    2.05    0.07
   8  11   1    1.92    0.07
  -8  12   1    1.42    0.05
  -8  12   1    1.34    0.05
  -8  12   1    1.32    0.05
  -7  12   1    0.46    0.04
  -7  12   1    0.52    0.04
  -7  12   1    0.48    0.04
  -6  12   1    0.68    0.05
  -6  12   1    0.69    0.07
  -6  12   1    0.63    0.05
  -6  12   1    0.66    0.04
  -6  12   1    0.67    0.05
  -6  12   1    0.62    0.06
  -5  12   1    2.80    0.12
  -5  12   1    2.95    0.13
  -5  12   1    2.81    0.10
  -4  12   1    9.34    0.28
  -4  12   1    9.24    0.30
  -4  12   1    9.12    0.31
  -4  12   1    9.54    0.36
  -3  12   1   37.38    1.23
  -3  12   1   37.19    1.37
  -2  12   1   37.20    1.30
  -2  12   1   35.19    1.17
  -2  12   1   33.91    1.30
   1 -12  -1   51.28    1.86
   1 -12  -1   48.39    1.86
  -1  12   1   49.61    1.86
  -1  12   1   51.25    1.66
  -1  12   1   52.00    1.85
   0 -12  -1  120.95    4.38
   0 -12  -1  118.59    4.37
   0  12   1  115.48    3.87
   0  12   1  119.15    4.37
  -1 -12  -1    0.54    0.04
   1  12   1    0.51    0.05
   1  12   1    0.55    0.03
  -2 -12  -1   25.05    0.87
   2  12   1   25.43    0.86
  -3 -12  -1    7.23    0.29
  -3 -12  -1    7.52    0.27
   3  12   1    7.20    0.26
  -4 -12  -1    0.40    0.05
   4  12   1    0.37    0.03
  -5 -12  -1    0.70    0.06
  -5 -12  -1    0.65    0.06
   5  12   1    0.63    0.05
   5  12   1    0.45    0.06
  -6 -12  -1    0.20    0.04
  -6 -12  -1    0.18    0.03
  -6 -12  -1    0.17    0.03
   6  12   1    0.15    0.03
   6  12   1    0.22    0.03
   6  12   1    0.18    0.03
  -7 -12  -1    0.58    0.05
  -7 -12  -1    0.69    0.05
  -8 -12  -1    7.95    0.25
  -8 -12  -1    8.11    0.25
  -8  13   1    6.88    0.22
  -8  13   1    6.78    0.21
   7 -13  -1    2.57    0.10
   7 -13  -1    2.72    0.11
  -7  13   1    2.74    0.09
  -7  13   1    2.74    0.10
  -7  13   1    2.76    0.10
  -6  13   1   11.12    0.44
  -6  13   1   11.83    0.37
  -6  13   1   11.69    0.34
  -6  13   1   11.37    0.35
  -6  13   1   11.93    0.37
  -6  13   1   11.31    0.38
  -5  13   1    0.05    0.03
  -5  13   1    0.11    0.03
  -5  13   1    0.08    0.03
  -5  13   1    0.10    0.04
  -5  13   1    0.11    0.03
  -4  13   1    1.14    0.08
  -4  13   1    0.93    0.07
  -4  13   1    0.93    0.06
  -4  13   1    1.08    0.06
  -3  13   1    5.93    0.22
  -3  13   1    5.79    0.23
  -2  13   1   12.80    0.48
   1 -13  -1    1.13    0.05
   1 -13  -1    1.14    0.05
  -1  13   1    1.17    0.06
  -1  13   1    1.17    0.05
  -1  13   1    1.16    0.06
   0 -13  -1   12.72    0.47
   0  13   1   12.84    0.47
   0  13   1   11.70    0.43
   0  13   1   12.63    0.42
  -1 -13  -1    4.50    0.18
   1  13   1    4.20    0.16
   1  13   1    4.30    0.18
   1  13   1    4.40    0.16
  -2 -13  -1    3.87    0.16
   2  13   1    3.71    0.14
  -3 -13  -1    0.13    0.04
  -3 -13  -1    0.10    0.03
   3  13   1    0.09    0.02
  -4 -13  -1    5.04    0.20
   4  13   1    5.17    0.19
  -5 -13  -1    0.07    0.03
  -5 -13  -1    0.01    0.03
   5  13   1    0.03    0.03
   5  13   1    0.15    0.04
   5  13   1    0.07    0.02
  -6 -13  -1   -0.03    0.03
  -6 -13  -1    0.01    0.03
  -6 -13  -1   -0.01    0.03
   6  13   1   -0.01    0.02
   6  13   1    0.04    0.03
   6  13   1    0.01    0.02
  -7 -13  -1    0.00    0.02
  -7 -13  -1   -0.01    0.03
  -7 -13  -1    0.01    0.02
  -8 -13  -1    6.13    0.19
  -8 -13  -1    6.26    0.19
  -8  14   1    5.52    0.18
  -8  14   1    5.63    0.18
  -8  14   1    5.73    0.17
  -7  14   1    1.91    0.07
  -7  14   1    1.94    0.07
  -6  14   1    0.71    0.05
  -6  14   1    0.60    0.07
  -6  14   1    0.73    0.04
  -6  14   1    0.73    0.05
  -6  14   1    0.71    0.05
  -6  14   1    0.66    0.06
  -5  14   1    0.36    0.04
  -5  14   1    0.28    0.04
  -5  14   1    0.33    0.04
  -5  14   1    0.40    0.04
  -4  14   1    1.36    0.08
  -4  14   1    1.33    0.08
  -4  14   1    1.43    0.08
  -4  14   1    1.38    0.07
  -3  14   1    1.07    0.06
  -2  14   1   18.51    0.62
  -2  14   1   18.88    0.69
   1 -14  -1   10.14    0.34
   1 -14  -1    9.74    0.38
  -1  14   1   10.97    0.39
   0 -14  -1   21.95    0.81
   0  14   1   22.04    0.81
   0  14   1   22.34    0.72
   0  14   1   20.80    0.75
  -1 -14  -1   20.91    0.77
   1  14   1   20.32    0.69
   1  14   1   20.60    0.71
  -2 -14  -1    9.23    0.33
  -2 -14  -1    9.23    0.36
   2  14   1    8.94    0.32
  -3 -14  -1    0.96    0.06
  -3 -14  -1    0.79    0.09
   3  14   1    0.90    0.05
  -4 -14  -1   12.83    0.46
   4  14   1   12.96    0.45
  -5 -14  -1    3.40    0.13
  -5 -14  -1    3.58    0.15
   5  14   1    3.43    0.14
  -6 -14  -1    1.93    0.08
  -6 -14  -1    2.05    0.09
  -6 -14  -1    2.02    0.10
   6  14   1    1.92    0.08
   6  14   1    1.95    0.08
   6  14   1    1.97    0.09
  -7 -14  -1    5.70    0.19
  -7 -14  -1    5.63    0.18
  -8 -14  -1    1.55    0.06
  -8 -14  -1    1.60    0.06
  -8  15   1    8.34    0.25
  -8  15   1    7.82    0.25
   7 -15  -1    0.16    0.03
  -7  15   1    0.19    0.03
  -7  15   1    0.20    0.03
  -6  15   1    1.85    0.08
  -6  15   1    1.89    0.07
  -6  15   1    1.52    0.10
  -6  15   1    1.83    0.07
  -6  15   1    1.83    0.09
  -6  15   1    1.84    0.07
  -5  15   1    1.94    0.10
  -5  15   1    1.93    0.09
  -5  15   1    1.95    0.08
  -5  15   1    1.95    0.09
  -5  15   1    2.01    0.08
  -5  15   1    2.03    0.08
  -4  15   1    0.28    0.04
  -4  15   1    0.23    0.04
  -4  15   1    0.34    0.07
  -3  15   1    1.97    0.08
  -3  15   1    2.00    0.08
  -3  15   1    1.97    0.09
  -3  15   1    2.05    0.09
  -2  15   1    1.05    0.05
  -2  15   1    1.08    0.05
  -1  15   1    0.35    0.03
  -1  15   1    0.36    0.03
  -1  15   1    0.40    0.04
   0  15   1    6.11    0.23
   0  15   1    7.05    0.26
  -1 -15  -1    2.54    0.11
   1  15   1    2.33    0.10
  -2 -15  -1   15.58    0.61
  -2 -15  -1   16.51    0.56
   2  15   1   15.88    0.55
  -3 -15  -1    0.56    0.05
   3  15   1    0.85    0.05
  -4 -15  -1   22.87    0.80
   4  15   1   22.76    0.79
  -5 -15  -1    0.14    0.03
  -5 -15  -1    0.13    0.04
   5  15   1    0.12    0.03
  -6 -15  -1    0.06    0.02
  -6 -15  -1    0.01    0.03
   6  15   1    0.03    0.02
   6  15   1    0.01    0.02
  -7 -15  -1    2.14    0.09
  -7 -15  -1    2.17    0.08
   7 -16  -1    8.44    0.29
  -7  16   1    8.56    0.27
  -7  16   1    8.74    0.26
  -7  16   1    8.62    0.27
   6 -16  -1    2.25    0.10
  -6  16   1    2.38    0.08
  -6  16   1    2.43    0.09
  -6  16   1    2.18    0.09
  -6  16   1    2.01    0.13
  -6  16   1    2.40    0.10
  -5  16   1    0.44    0.04
  -5  16   1    0.39    0.05
  -5  16   1    0.44    0.04
  -5  16   1    0.47    0.04
  -5  16   1    0.61    0.04
  -5  16   1    0.46    0.06
  -4  16   1    3.08    0.11
  -4  16   1    3.24    0.14
  -4  16   1    3.15    0.13
  -4  16   1    3.09    0.14
  -3  16   1   12.26    0.47
  -3  16   1   12.38    0.40
  -3  16   1   12.41    0.42
  -2  16   1    0.24    0.03
  -1  16   1    0.17    0.03
  -1  16   1    0.08    0.02
  -1  16   1    0.10    0.02
   0  16   1    0.15    0.03
   0  16   1    0.22    0.03
  -1 -16  -1    0.01    0.02
   1  16   1    0.07    0.02
  -2 -16  -1    0.77    0.05
  -3 -16  -1    8.09    0.29
   3  16   1    7.21    0.27
   3  16   1    7.70    0.28
  -4 -16  -1    4.75    0.20
  -4 -16  -1    5.09    0.18
  -4 -16  -1    5.03    0.17
   4  16   1    5.03    0.19
  -5 -16  -1   26.73    0.85
  -5 -16  -1   28.76    0.98
   5  16   1   27.86    0.96
   5  16   1   28.25    0.86
  -6 -16  -1    0.10    0.03
  -6 -16  -1    0.11    0.02
   6  16   1    0.10    0.03
   6  16   1    0.07    0.02
  -7 -16  -1    2.29    0.09
  -7 -16  -1    2.20    0.08
  -7  17   1    0.43    0.03
  -7  17   1    0.34    0.03
  -7  17   1    0.47    0.03
   6 -17  -1    1.17    0.06
  -6  17   1    1.08    0.05
  -6  17   1    1.11    0.05
  -6  17   1    1.21    0.06
  -6  17   1    1.13    0.05
  -6  17   1    1.09    0.06
  -5  17   1    0.12    0.03
  -5  17   1    0.13    0.02
  -5  17   1    0.15    0.02
  -5  17   1    0.15    0.03
  -5  17   1    0.15    0.04
  -5  17   1    0.12    0.02
  -4  17   1    0.39    0.04
  -4  17   1    0.44    0.06
  -4  17   1    0.41    0.05
  -4  17   1    0.31    0.04
  -4  17   1    0.40    0.04
  -3  17   1    0.13    0.03
  -3  17   1    0.11    0.05
  -3  17   1    0.15    0.03
  -3  17   1    0.22    0.04
  -2  17   1    0.10    0.02
  -2  17   1    0.11    0.03
  -2  17   1    0.13    0.04
  -1  17   1    0.85    0.06
  -1  17   1    0.94    0.05
   0  17   1   12.24    0.42
  -1 -17  -1    0.13    0.02
   1  17   1    0.16    0.03
   1  17   1    0.18    0.03
  -2 -17  -1    0.00    0.02
   2  17   1   -0.07    0.05
  -3 -17  -1    3.69    0.14
  -3 -17  -1    3.84    0.15
   3  17   1    3.35    0.15
   3  17   1    3.88    0.14
  -4 -17  -1    0.42    0.05
  -4 -17  -1    0.46    0.06
   4  17   1    0.64    0.05
   4  17   1    0.51    0.04
  -5 -17  -1    0.25    0.04
  -5 -17  -1    0.21    0.04
   5  17   1    0.27    0.04
  -6 -17  -1    0.08    0.03
  -6 -17  -1    0.12    0.02
   6  17   1    0.12    0.03
   6  17   1    0.07    0.02
  -7 -17  -1    0.02    0.02
  -7  18   1    8.24    0.26
  -7  18   1    8.27    0.26
   6 -18  -1    4.87    0.18
  -6  18   1    5.21    0.16
  -6  18   1    4.95    0.17
  -6  18   1    5.21    0.17
  -6  18   1    5.18    0.16
   5 -18  -1    0.81    0.05
  -5  18   1    0.75    0.06
  -5  18   1    0.78    0.05
  -5  18   1    0.78    0.05
  -5  18   1    0.84    0.05
  -5  18   1    0.70    0.07
  -5  18   1    0.79    0.05
   4 -18  -1    0.00    0.02
  -4  18   1    0.05    0.05
  -4  18   1    0.03    0.02
  -4  18   1   -0.01    0.03
  -4  18   1    0.07    0.02
  -4  18   1    0.00    0.03
  -4  18   1    0.04    0.02
   3 -18  -1    4.90    0.17
  -3  18   1    4.77    0.17
  -3  18   1    4.60    0.16
  -3  18   1    4.70    0.18
  -3  18   1    4.83    0.19
  -3  18   1    4.80    0.18
   2 -18  -1    0.32    0.04
  -2  18   1    0.43    0.06
  -2  18   1    0.36    0.05
  -2  18   1    0.37    0.04
  -2  18   1    0.37    0.04
  -1  18   1    0.57    0.05
  -1  18   1    0.63    0.06
  -1  18   1    0.60    0.05
   0  18   1    0.09    0.02
   0  18   1    0.18    0.05
   0  18   1    0.12    0.03
   0  18   1    0.13    0.04
  -1 -18  -1    6.33    0.23
   1  18   1    5.99    0.23
   1  18   1    6.38    0.22
   1  18   1    6.04    0.22
  -2 -18  -1    0.71    0.05
   2  18   1    0.75    0.08
   2  18   1    0.60    0.05
  -3 -18  -1    3.66    0.15
   3  18   1    3.60    0.15
   3  18   1    3.67    0.14
   3  18   1    3.75    0.14
  -4 -18  -1    3.05    0.14
  -4 -18  -1    3.06    0.12
   4  18   1    3.04    0.12
   4  18   1    2.94    0.12
  -5 -18  -1    1.42    0.08
  -5 -18  -1    1.28    0.07
  -5 -18  -1    1.32    0.07
   5  18   1    1.38    0.07
   5  18   1    1.42    0.07
  -6 -18  -1    0.16    0.03
   6  18   1    0.23    0.03
  -7 -18  -1    0.94    0.05
   7  18   1    0.86    0.04
  -7  19   1    0.02    0.01
   6 -19  -1    3.16    0.12
  -6  19   1    3.28    0.11
  -6  19   1    2.83    0.11
   5 -19  -1   14.45    0.49
  -5  19   1   14.18    0.57
  -5  19   1   15.49    0.48
  -5  19   1   15.12    0.46
  -5  19   1   14.96    0.43
  -4  19   1    6.93    0.22
  -4  19   1    6.85    0.23
  -4  19   1    6.48    0.23
  -4  19   1    5.93    0.26
   3 -19  -1    2.04    0.09
  -3  19   1    2.07    0.10
  -3  19   1    2.04    0.09
  -3  19   1    2.04    0.10
  -3  19   1    2.16    0.10
   2 -19  -1   -0.02    0.03
  -2  19   1    0.01    0.03
  -2  19   1    0.00    0.02
  -2  19   1    0.01    0.05
  -1  19   1    0.14    0.04
  -1  19   1    0.10    0.03
   0  19   1    5.67    0.19
   0  19   1    5.70    0.20
   0  19   1    5.28    0.20
   0  19   1    5.04    0.19
  -1 -19  -1    0.99    0.06
   1  19   1    1.21    0.07
   1  19   1    0.92    0.08
   1  19   1    1.02    0.06
  -2 -19  -1    0.65    0.05
   2  19   1    0.76    0.07
   2  19   1    0.75    0.07
  -3 -19  -1   13.52    0.49
  -3 -19  -1   14.00    0.42
   3  19   1   13.61    0.45
   3  19   1   13.93    0.43
   3  19   1   13.35    0.48
  -4 -19  -1    0.39    0.05
  -4 -19  -1    0.38    0.04
   4  19   1    0.38    0.06
   4  19   1    0.33    0.04
  -5 -19  -1    3.82    0.16
   5  19   1    3.81    0.14
  -6 -19  -1    8.76    0.26
   6  19   1    7.56    0.30
   6  19   1    8.69    0.27
  -7 -19  -1    1.74    0.07
   7  19   1    1.70    0.06
  -7  20   1    5.35    0.17
  -7  20   1    5.29    0.17
  -6  20   1    2.96    0.10
  -6  20   1    2.91    0.11
  -6  20   1    2.91    0.10
  -5  20   1    0.23    0.05
  -5  20   1    0.31    0.04
  -5  20   1    0.42    0.04
  -5  20   1    0.34    0.04
   4 -20  -1    0.00    0.02
  -4  20   1   -0.03    0.03
  -4  20   1    0.06    0.04
  -4  20   1    0.00    0.03
  -4  20   1    0.06    0.02
  -4  20   1    0.00    0.02
  -4  20   1    0.01    0.02
   3 -20  -1    2.39    0.10
  -3  20   1    2.41    0.09
  -3  20   1    2.49    0.10
  -3  20   1    2.17    0.11
  -3  20   1    2.52    0.11
  -3  20   1    2.35    0.11
  -2  20   1   10.90    0.36
  -2  20   1   10.78    0.38
  -2  20   1   10.56    0.36
  -2  20   1   11.41    0.36
  -1  20   1    1.04    0.07
  -1  20   1    1.51    0.07
   0  20   1    2.51    0.10
   0  20   1    2.38    0.11
   0  20   1    2.47    0.11
   0  20   1    2.50    0.11
  -1 -20  -1    7.44    0.27
   1  20   1    7.17    0.27
   1  20   1    7.02    0.25
   1  20   1    7.43    0.25
   2  20   1    0.20    0.04
   2  20   1    0.22    0.04
  -3 -20  -1    0.17    0.03
  -3 -20  -1    0.11    0.03
   3  20   1    0.18    0.05
  -4 -20  -1    0.40    0.04
  -4 -20  -1    0.46    0.05
   4  20   1    0.39    0.05
   4  20   1    0.44    0.05
  -5 -20  -1    7.78    0.25
   5  20   1    7.89    0.26
  -6 -20  -1    1.46    0.07
   6  20   1    1.42    0.06
  -7 -20  -1    0.54    0.03
  -6  21   1    0.05    0.01
  -5  21   1   10.16    0.33
  -5  21   1   10.28    0.33
  -5  21   1   10.09    0.32
  -4  21   1    6.32    0.22
  -4  21   1    5.94    0.20
  -4  21   1    5.96    0.20
  -4  21   1    6.21    0.21
  -3  21   1    0.39    0.05
  -3  21   1    0.37    0.04
  -3  21   1    0.35    0.06
  -3  21   1    0.41    0.04
  -3  21   1    0.35    0.05
  -2  21   1    0.11    0.03
  -2  21   1    0.10    0.03
  -2  21   1    0.14    0.05
  -2  21   1    0.10    0.03
  -2  21   1    0.13    0.03
  -2  21   1    0.12    0.04
  -1  21   1   15.06    0.47
  -1  21   1   14.77    0.50
  -1  21   1   14.20    0.47
   0  21   1    9.82    0.32
   0  21   1    9.97    0.33
   0  21   1   10.30    0.35
   0  21   1   10.09    0.33
   0  21   1    9.84    0.34
  -1 -21  -1    2.10    0.10
   1  21   1    2.01    0.12
   1  21   1    2.15    0.10
  -2 -21  -1    4.24    0.17
   2  21   1    4.42    0.17
   2  21   1    4.51    0.17
  -3 -21  -1   22.12    0.80
   3  21   1   23.41    0.71
   3  21   1   23.00    0.79
  -4 -21  -1    1.16    0.07
  -4 -21  -1    1.01    0.07
   4  21   1    1.13    0.07
  -5 -21  -1    8.00    0.25
   5  21   1    7.59    0.28
  -6 -21  -1    0.03    0.02
   6  21   1    0.02    0.02
  -6  22   1   11.46    0.36
  -6  22   1   11.54    0.36
  -5  22   1    0.83    0.04
   4 -22  -1    0.20    0.03
  -4  22   1    0.12    0.02
  -4  22   1    0.13    0.03
  -3  22   1    9.35    0.32
  -3  22   1    9.55    0.31
  -3  22   1    9.87    0.32
  -3  22   1    9.43    0.31
  -2  22   1    0.19    0.03
  -2  22   1    0.26    0.04
  -2  22   1    0.22    0.04
  -2  22   1    0.25    0.05
  -2  22   1    0.22    0.03
  -1  22   1  119.79    3.76
  -1  22   1  124.95    3.99
  -1  22   1  116.97    3.78
  -1  22   1  122.90    3.69
  -1  22   1  123.87    3.69
   0  22   1    0.08    0.04
   0  22   1    0.13    0.05
   0  22   1    0.07    0.03
  -1 -22  -1    0.58    0.05
   1  22   1    0.73    0.06
   1  22   1    0.83    0.08
   1  22   1    0.84    0.07
  -2 -22  -1   -0.02    0.02
   2  22   1    0.00    0.05
  -3 -22  -1    5.62    0.22
  -3 -22  -1    5.72    0.19
   3  22   1    5.39    0.19
  -4 -22  -1    4.21    0.17
   4  22   1    4.03    0.16
   4  22   1    3.99    0.15
  -5 -22  -1    0.38    0.04
   5  22   1    0.38    0.04
  -6 -22  -1    0.08    0.02
  -6  23   1    1.34    0.05
   5 -23  -1    1.00    0.06
  -5  23   1    1.10    0.05
  -5  23   1    0.97    0.05
  -4  23   1    7.78    0.27
  -4  23   1    8.11    0.26
  -4  23   1    8.32    0.26
  -4  23   1    8.13    0.27
  -3  23   1    1.91    0.09
  -3  23   1    2.01    0.08
  -3  23   1    1.98    0.08
  -3  23   1    1.77    0.11
  -3  23   1    2.11    0.09
  -2  23   1    2.95    0.12
  -2  23   1    3.05    0.12
  -1  23   1   22.19    0.69
  -1  23   1   21.33    0.71
  -1  23   1   22.28    0.68
  -1  23   1   22.35    0.70
   0 -23  -1    3.67    0.15
   0  23   1    3.82    0.14
   0  23   1    3.77    0.14
   0  23   1    3.52    0.14
  -1 -23  -1    3.47    0.14
   1  23   1    3.11    0.14
   1  23   1    3.26    0.13
   1  23   1    3.42    0.13
  -2 -23  -1    0.80    0.06
   2  23   1    0.93    0.08
   2  23   1    1.05    0.07
  -3 -23  -1    0.06    0.03
  -3 -23  -1    0.10    0.03
   3  23   1    0.11    0.04
   3  23   1    0.13    0.03
  -4 -23  -1    0.85    0.06
  -4 -23  -1    0.89    0.07
   4  23   1    0.91    0.06
   4  23   1    0.83    0.05
  -5 -23  -1    0.03    0.02
   5  23   1    0.09    0.03
   5  23   1    0.07    0.02
  -6 -23  -1    0.28    0.03
   6  23   1    0.26    0.03
  -5  24   1    0.10    0.02
  -5  24   1    0.07    0.02
  -4  24   1    0.60    0.06
  -4  24   1    0.57    0.04
  -4  24   1    0.59    0.04
  -3  24   1    5.00    0.18
  -3  24   1    5.12    0.18
  -3  24   1    5.36    0.19
  -2  24   1    0.13    0.03
  -2  24   1    0.11    0.03
  -1  24   1   12.54    0.41
  -1  24   1   12.67    0.42
  -1  24   1   12.75    0.41
   0 -24  -1    3.25    0.14
   0  24   1    3.47    0.13
   0  24   1    3.41    0.14
   0  24   1    3.35    0.14
  -1 -24  -1    1.13    0.07
   1  24   1    1.03    0.07
   1  24   1    1.08    0.07
   1  24   1    1.05    0.07
   1  24   1    0.97    0.08
  -2 -24  -1    0.38    0.05
  -2 -24  -1    0.38    0.05
   2  24   1    0.44    0.05
   2  24   1    0.53    0.05
   2  24   1    0.49    0.06
  -3 -24  -1    0.24    0.04
  -3 -24  -1    0.25    0.03
   3  24   1    0.24    0.04
   3  24   1    0.19    0.05
  -4 -24  -1    0.03    0.02
   4  24   1    0.01    0.02
   4  24   1   -0.05    0.04
   4  24   1   -0.04    0.04
  -5 -24  -1    0.37    0.04
   5  24   1    0.32    0.03
  -5  25   1    2.51    0.09
  -5  25   1    2.57    0.09
  -4  25   1    0.02    0.02
  -3  25   1    2.81    0.11
  -3  25   1    2.59    0.12
  -3  25   1    2.68    0.10
  -3  25   1    2.62    0.10
  -2  25   1    4.59    0.16
  -2  25   1    4.53    0.16
  -2  25   1    4.10    0.15
  -2  25   1    4.24    0.17
  -1  25   1    0.78    0.07
  -1  25   1    0.67    0.06
  -1  25   1    0.74    0.05
   0 -25  -1    0.06    0.02
   0  25   1    0.03    0.03
   0  25   1   -0.02    0.04
   0  25   1    0.03    0.03
  -1 -25  -1    1.34    0.08
   1  25   1    1.39    0.08
   1  25   1    1.35    0.08
   1  25   1    1.35    0.08
  -2 -25  -1    0.53    0.05
   2  25   1    0.58    0.06
   2  25   1    0.64    0.05
   2  25   1    0.62    0.07
  -3 -25  -1    0.02    0.03
  -3 -25  -1    0.02    0.02
   3  25   1    0.04    0.04
   3  25   1    0.04    0.02
   3  25   1    0.03    0.02
  -4 -25  -1    2.27    0.09
   4  25   1    2.22    0.10
   4  25   1    2.17    0.09
  -5 -25  -1    0.11    0.02
   5  25   1    0.09    0.02
   5  25   1    0.09    0.02
   5 -26  -1    0.00    0.02
  -5  26   1    0.04    0.01
  -4  26   1    0.59    0.04
  -4  26   1    0.63    0.04
  -3  26   1    0.19    0.04
  -3  26   1    0.12    0.03
  -3  26   1    0.17    0.02
  -3  26   1    0.19    0.03
  -2  26   1    3.63    0.14
  -2  26   1    3.73    0.14
  -2  26   1    3.62    0.13
   1 -26  -1    0.15    0.03
  -1  26   1    0.15    0.03
  -1  26   1    0.15    0.04
   0 -26  -1   10.85    0.38
   0  26   1   10.24    0.34
   0  26   1   10.19    0.33
   0  26   1   10.45    0.35
  -1 -26  -1    0.37    0.05
   1  26   1    0.32    0.04
   1  26   1    0.30    0.04
   1  26   1    0.32    0.04
  -2 -26  -1    8.25    0.32
  -2 -26  -1    8.99    0.28
   2  26   1    9.26    0.30
   2  26   1    8.69    0.28
   2  26   1    8.97    0.29
  -3 -26  -1    0.02    0.02
  -4 -26  -1    1.20    0.06
   4  26   1    1.21    0.05
   4  26   1    1.02    0.07
  -5 -26  -1    0.39    0.03
   5  26   1    0.37    0.03
   5  26   1    0.39    0.03
  -4  27   1    0.11    0.02
  -4  27   1    0.13    0.02
  -3  27   1    2.79    0.11
  -3  27   1    2.88    0.11
  -2  27   1    0.21    0.03
  -2  27   1    0.23    0.03
   1 -27  -1    0.47    0.05
  -1  27   1    0.46    0.05
  -1  27   1    0.55    0.06
   0 -27  -1    0.83    0.06
   0  27   1    0.77    0.06
   0  27   1    0.80    0.06
  -1 -27  -1    0.69    0.06
   1  27   1    0.70    0.06
   1  27   1    0.73    0.06
  -2 -27  -1    0.50    0.04
  -3 -27  -1   -0.01    0.02
   3  27   1    0.01    0.02
  -4 -27  -1    5.27    0.17
   4  27   1    5.07    0.16
   4  27   1    5.00    0.17
  -3  28   1    0.69    0.05
  -2  28   1    0.67    0.05
  -2  28   1    0.60    0.06
  -1  28   1   -0.02    0.02
  -1  28   1    0.04    0.03
   0  28   1    1.39    0.07
   0  28   1    1.32    0.07
   1  28   1    0.08    0.03
   1  28   1    0.08    0.03
  -2 -28  -1    0.34    0.04
   2  28   1    0.43    0.05
   2  28   1    0.51    0.04
  -3 -28  -1    0.90    0.05
   3  28   1    0.87    0.06
   3  28   1    0.87    0.05
  -4 -28  -1    1.32    0.05
   4  28   1    1.30    0.05
   4  28   1    1.28    0.05
  -4  29   1    0.00    0.02
  -3  29   1    1.61    0.07
  -2  29   1    0.91    0.05
  -2  29   1    0.70    0.06
  -1  29   1    0.06    0.03
   0  29   1    0.17    0.03
   0  29   1    0.20    0.03
  -1 -29  -1    0.09    0.02
   1  29   1    0.15    0.03
   1  29   1    0.10    0.03
   1  29   1    0.17    0.03
   1  29   1    0.13    0.03
  -2 -29  -1    0.40    0.04
   2  29   1    0.42    0.04
   2  29   1    0.44    0.04
   2  29   1    0.44    0.05
  -3 -29  -1    0.81    0.04
   3  29   1    0.73    0.05
  -3  30   1    0.63    0.04
  -2  30   1    1.10    0.05
   1 -30  -1    0.78    0.05
  -1  30   1    0.76    0.05
  -1  30   1    0.80    0.05
   0  30   1    0.43    0.04
   0  30   1    0.58    0.04
  -1 -30  -1    0.08    0.02
   1  30   1    0.10    0.02
  -2 -30  -1    0.10    0.02
   2  30   1    0.08    0.02
  -3 -30  -1    0.53    0.03
  -2  31   1    0.05    0.02
  -2  31   1    0.05    0.03
  -1  31   1    1.96    0.08
  -1  31   1    1.93    0.08
   0 -31  -1   -0.01    0.01
   0  31   1    0.00    0.02
   0  31   1    0.00    0.02
   1  31   1    2.84    0.11
  -2 -31  -1    4.42    0.14
   2  31   1    4.29    0.15
  -1  32   1    0.56    0.04
   0 -32  -1    0.59    0.03
   0  32   1    0.56    0.04
   0  32   1    0.50    0.04
   0  32  -2    3.12    0.11
   0 -32   2    3.06    0.10
   2  31  -2    0.04    0.02
   2  31  -2    0.02    0.02
  -2 -31   2    0.05    0.01
   1  31  -2    0.46    0.04
   1  31  -2    0.43    0.04
  -1 -31   2    0.48    0.03
   0  31  -2    0.05    0.02
   0  31  -2    0.02    0.02
  -1  31  -2    3.69    0.13
  -1  31  -2    3.56    0.13
  -2  31  -2    0.02    0.02
   3  30  -2    0.65    0.04
   3  30  -2    0.63    0.04
  -3 -30   2    0.62    0.04
   2  30  -2    0.04    0.02
   2  30  -2    0.03    0.02
  -2 -30   2    0.05    0.02
   1  30  -2    0.03    0.02
  -1 -30   2    0.05    0.02
   0  30  -2    0.28    0.04
   0  30  -2    0.26    0.04
  -1  30  -2    0.01    0.02
  -1  30  -2   -0.01    0.02
  -2  30  -2    0.02    0.02
  -2  30  -2    0.02    0.03
  -3  30  -2    1.89    0.07
   4  29  -2    1.84    0.07
   3  29  -2    0.99    0.05
   3  29  -2    1.04    0.05
  -3 -29   2    1.02    0.05
   2  29  -2    0.12    0.03
  -2 -29   2    0.16    0.02
   1  29  -2    0.09    0.03
   0  29  -2    0.32    0.04
   0  29  -2    0.36    0.04
   0  29  -2    0.37    0.04
  -1  29  -2    0.13    0.03
  -1  29  -2    0.15    0.02
  -2  29  -2    5.53    0.19
  -3  29  -2    0.40    0.03
   4  28  -2    0.75    0.06
   4  28  -2    0.90    0.04
  -4 -28   2    0.85    0.04
   3  28  -2    0.51    0.05
   3  28  -2    0.53    0.04
  -3 -28   2    0.50    0.04
   2  28  -2    2.96    0.11
  -2 -28   2    2.82    0.10
  -2 -28   2    2.76    0.12
   1  28  -2    1.41    0.07
  -1 -28   2    1.33    0.08
   0  28  -2    1.19    0.07
   0  28  -2    1.21    0.07
   0 -28   2    1.22    0.07
  -1  28  -2    0.41    0.05
  -1  28  -2    0.38    0.04
   1 -28   2    0.41    0.04
  -2  28  -2    1.17    0.07
  -2  28  -2    1.29    0.06
  -2  28  -2    1.32    0.07
  -3  28  -2    0.02    0.02
  -3  28  -2    0.03    0.02
  -4  28  -2    1.57    0.06
   4  27  -2    0.08    0.02
   4  27  -2    0.12    0.03
  -4 -27   2    0.10    0.02
   3  27  -2    1.85    0.08
  -3 -27   2    1.96    0.08
   2  27  -2    9.17    0.31
  -2 -27   2    9.17    0.29
  -2 -27   2    9.06    0.34
   1  27  -2    3.13    0.12
   1  27  -2    3.29    0.13
  -1 -27   2    3.12    0.13
   0  27  -2    3.76    0.14
   0 -27   2    4.00    0.16
  -1  27  -2    1.86    0.08
  -1  27  -2    1.98    0.09
  -1  27  -2    1.96    0.09
   1 -27   2    1.99    0.09
  -2  27  -2    1.81    0.09
  -2  27  -2    1.86    0.08
  -2  27  -2    1.76    0.08
  -3  27  -2    1.92    0.08
  -3  27  -2    1.72    0.08
  -4  27  -2    0.68    0.04
  -5 -26   2    0.64    0.04
   4  26  -2    0.29    0.04
   4  26  -2    0.33    0.04
  -4 -26   2    0.26    0.04
   3  26  -2    0.87    0.06
  -3 -26   2    0.86    0.05
  -3 -26   2    0.87    0.07
   2  26  -2    2.53    0.11
   2  26  -2    2.50    0.11
   2  26  -2    2.36    0.10
  -2 -26   2    2.52    0.10
   1  26  -2    0.21    0.04
   1  26  -2    0.21    0.04
   0  26  -2   10.26    0.33
   0  26  -2    9.86    0.33
   0 -26   2    9.63    0.36
  -1  26  -2    0.11    0.03
  -1  26  -2    0.15    0.03
  -1  26  -2    0.14    0.03
  -2  26  -2    0.28    0.04
  -2  26  -2    0.25    0.04
  -2  26  -2    0.20    0.03
  -3  26  -2    3.49    0.12
  -3  26  -2    2.88    0.12
   3 -26   2    3.60    0.11
  -4  26  -2    0.07    0.02
   4 -26   2    0.06    0.02
  -5  26  -2    0.59    0.03
   5 -26   2    0.54    0.03
   5  25  -2    0.66    0.04
  -5 -25   2    0.72    0.04
   4  25  -2    1.13    0.06
   4  25  -2    1.16    0.07
  -4 -25   2    1.29    0.06
  -4 -25   2    1.11    0.07
   3  25  -2    2.16    0.09
   3  25  -2    2.08    0.10
  -3 -25   2    2.19    0.11
  -3 -25   2    2.13    0.09
   2  25  -2    0.91    0.06
   2  25  -2    0.94    0.07
   2  25  -2    0.84    0.06
   2  25  -2    0.94    0.06
  -2 -25   2    0.82    0.06
   1  25  -2    0.31    0.04
   1  25  -2    0.25    0.04
   1  25  -2    0.33    0.05
  -1 -25   2    0.32    0.05
   0  25  -2    8.61    0.29
   0  25  -2    8.73    0.31
   0  25  -2    8.94    0.29
   0  25  -2    8.65    0.29
   0  25  -2    8.96    0.30
   0 -25   2    8.61    0.32
  -1  25  -2    2.33    0.11
  -1  25  -2    2.40    0.10
  -1  25  -2    2.31    0.10
  -1  25  -2    2.35    0.11
  -2  25  -2    0.56    0.05
  -2  25  -2    0.47    0.05
  -2  25  -2    0.53    0.05
  -3  25  -2    1.51    0.07
  -3  25  -2    1.60    0.08
  -3  25  -2    1.60    0.07
   3 -25   2    1.45    0.06
  -4  25  -2    0.85    0.05
  -5  25  -2    0.12    0.02
  -5  25  -2    0.13    0.02
   5 -25   2    0.10    0.01
   6  24  -2    2.57    0.09
   5  24  -2    0.91    0.05
  -5 -24   2    0.83    0.05
   4  24  -2    0.92    0.05
  -4 -24   2    0.89    0.07
  -4 -24   2    0.92    0.06
   3  24  -2    1.80    0.08
  -3 -24   2    1.73    0.09
  -3 -24   2    1.78    0.08
   2  24  -2    0.13    0.04
   2  24  -2    0.10    0.04
  -2 -24   2    0.17    0.03
   1  24  -2    8.62    0.29
   1  24  -2    8.59    0.29
   1  24  -2    8.21    0.28
   1  24  -2    8.56    0.31
  -1 -24   2    8.61    0.31
   0  24  -2    0.14    0.03
   0  24  -2    0.04    0.03
   0  24  -2    0.00    0.03
   0  24  -2    0.06    0.04
   0  24  -2    0.02    0.03
   0 -24   2   -0.01    0.02
  -1  24  -2   13.34    0.43
  -1  24  -2   13.42    0.43
  -1  24  -2   13.28    0.44
  -1  24  -2   12.89    0.46
  -2  24  -2    3.04    0.12
  -2  24  -2    3.08    0.13
  -2  24  -2    3.03    0.11
  -2  24  -2    3.11    0.13
  -3  24  -2    1.32    0.07
  -3  24  -2    1.19    0.06
  -3  24  -2    1.28    0.07
  -4  24  -2    3.71    0.13
  -4  24  -2    3.59    0.13
  -5  24  -2    2.55    0.09
   6  23  -2    4.05    0.13
  -6 -23   2    4.05    0.13
   5  23  -2    4.46    0.15
  -5 -23   2    4.56    0.16
   4  23  -2    1.43    0.07
  -4 -23   2    1.49    0.07
   3  23  -2    1.24    0.08
   3  23  -2    1.15    0.07
  -3 -23   2    1.29    0.08
  -3 -23   2    1.26    0.07
   2  23  -2    7.93    0.26
   2  23  -2    7.82    0.27
  -2 -23   2    7.77    0.29
   1  23  -2   66.15    2.09
   1  23  -2   70.33    2.26
   1  23  -2   68.81    2.02
   1  23  -2   69.23    2.14
  -1 -23   2   67.88    2.34
   0  23  -2    3.97    0.14
   0  23  -2    3.74    0.16
   0  23  -2    3.83    0.15
   0  23  -2    3.81    0.15
   0  23  -2    3.65    0.15
  -1  23  -2    1.67    0.09
  -1  23  -2    1.65    0.08
  -1  23  -2    1.68    0.08
  -1  23  -2    1.66    0.09
  -1  23  -2    1.81    0.09
  -2  23  -2    0.08    0.04
  -2  23  -2    0.11    0.03
  -2  23  -2    0.13    0.03
  -2  23  -2    0.16    0.04
  -2  23  -2    0.07    0.03
  -3  23  -2   10.92    0.35
  -3  23  -2   11.33    0.36
  -3  23  -2   11.05    0.36
  -4  23  -2    4.76    0.17
  -4  23  -2    4.80    0.16
   4 -23   2    4.66    0.17
  -5  23  -2    1.86    0.07
  -5  23  -2    1.87    0.08
   5 -23   2    1.79    0.08
  -6  23  -2    0.06    0.02
   6  22  -2    0.08    0.02
   6  22  -2    0.07    0.04
  -6 -22   2    0.09    0.02
   5  22  -2    5.94    0.20
  -5 -22   2    6.04    0.20
  -5 -22   2    5.84    0.23
   4  22  -2    3.54    0.15
   4  22  -2    3.61    0.13
  -4 -22   2    3.63    0.15
  -4 -22   2    3.59    0.13
   3  22  -2    0.28    0.04
  -3 -22   2    0.29    0.04
  -3 -22   2    0.39    0.05
   2  22  -2    3.78    0.15
  -2 -22   2    3.60    0.15
   1  22  -2    4.34    0.16
   1  22  -2    4.22    0.15
   1  22  -2    4.40    0.16
   1  22  -2    4.14    0.16
  -1 -22   2    3.57    0.16
   0  22  -2    3.21    0.14
   0  22  -2    3.71    0.14
   0  22  -2    3.53    0.14
   0  22  -2    3.56    0.14
   0  22  -2    3.68    0.15
  -1  22  -2    0.17    0.03
  -1  22  -2    0.13    0.04
  -1  22  -2    0.09    0.04
  -2  22  -2    8.10    0.28
  -2  22  -2    8.36    0.28
  -2  22  -2    8.49    0.27
  -2  22  -2    8.20    0.29
  -2  22  -2    8.45    0.30
  -3  22  -2    4.48    0.18
  -3  22  -2    4.36    0.15
  -3  22  -2    4.44    0.17
  -3  22  -2    4.65    0.16
  -4  22  -2    6.43    0.21
  -4  22  -2    6.19    0.21
  -4  22  -2    6.25    0.22
  -4  22  -2    6.60    0.22
   4 -22   2    6.40    0.22
  -5  22  -2    0.94    0.05
   5 -22   2    0.86    0.05
  -6  22  -2    0.45    0.03
   7  21  -2    0.50    0.03
   6  21  -2    1.60    0.07
  -6 -21   2    1.54    0.07
   5  21  -2    1.08    0.06
  -5 -21   2    1.16    0.07
  -5 -21   2    1.21    0.08
   4  21  -2    4.62    0.16
  -4 -21   2    4.58    0.16
  -4 -21   2    4.66    0.19
   3  21  -2    1.23    0.07
  -3 -21   2    1.23    0.07
  -3 -21   2    1.17    0.07
   2  21  -2    8.47    0.30
   2  21  -2    8.09    0.28
  -2 -21   2    8.69    0.31
   1  21  -2   31.91    0.98
   1  21  -2   31.51    1.06
   1  21  -2   30.80    0.99
  -1 -21   2   32.59    1.10
   0  21  -2    7.93    0.27
   0  21  -2    7.89    0.27
   0  21  -2    8.39    0.29
  -1  21  -2    1.62    0.08
  -1  21  -2    1.65    0.08
  -1  21  -2    1.63    0.09
  -1  21  -2    1.67    0.08
  -2  21  -2    0.37    0.05
  -2  21  -2    0.39    0.05
  -2  21  -2    0.44    0.05
   2 -21   2    0.37    0.04
  -3  21  -2    5.88    0.22
  -3  21  -2    6.00    0.21
  -3  21  -2    6.05    0.21
  -3  21  -2    5.62    0.20
   3 -21   2    5.97    0.21
  -4  21  -2    4.44    0.16
  -4  21  -2    4.42    0.15
  -5  21  -2    0.08    0.02
  -5  21  -2    0.11    0.02
  -7 -20   2    0.03    0.02
   6  20  -2    0.03    0.02
   5  20  -2    0.32    0.04
  -5 -20   2    0.34    0.04
   4  20  -2    7.43    0.24
   4  20  -2    6.97    0.25
  -4 -20   2    7.39    0.24
  -4 -20   2    7.25    0.28
   3  20  -2   -0.01    0.03
   3  20  -2    0.13    0.04
   3  20  -2    0.07    0.03
  -3 -20   2    0.02    0.03
   2  20  -2   27.00    0.91
   2  20  -2   26.39    0.84
   2  20  -2   28.00    0.86
  -2 -20   2   27.48    0.95
   1  20  -2    1.10    0.07
   1  20  -2    1.14    0.08
   1  20  -2    1.09    0.08
   1  20  -2    1.15    0.08
  -1 -20   2    1.09    0.06
   0  20  -2    2.30    0.11
   0  20  -2    2.48    0.10
   0  20  -2    2.07    0.12
   0  20  -2    2.30    0.10
  -1  20  -2    0.54    0.05
  -1  20  -2    0.39    0.05
  -1  20  -2    0.41    0.05
  -1  20  -2    0.44    0.05
  -2  20  -2   14.75    0.50
  -2  20  -2   15.66    0.48
  -2  20  -2   15.65    0.53
  -2  20  -2   15.83    0.50
   2 -20   2   15.15    0.51
  -3  20  -2    2.92    0.13
  -3  20  -2    3.45    0.11
  -3  20  -2    3.26    0.11
  -3  20  -2    2.93    0.12
  -3  20  -2    2.96    0.13
   3 -20   2    2.81    0.12
  -4  20  -2    0.04    0.02
  -4  20  -2    0.07    0.02
  -4  20  -2    0.11    0.03
   4 -20   2    0.04    0.02
  -5  20  -2    5.48    0.18
  -5  20  -2    5.49    0.19
   5 -20   2    5.53    0.19
  -6  20  -2    5.10    0.17
  -6  20  -2    5.23    0.17
  -6  20  -2    5.12    0.17
  -7 -19   2   22.51    0.67
   6  19  -2   15.93    0.47
   6  19  -2   14.83    0.53
  -6 -19   2   14.59    0.54
  -6 -19   2   15.69    0.47
   5  19  -2    2.35    0.10
   5  19  -2    2.21    0.09
  -5 -19   2    2.25    0.11
  -5 -19   2    2.33    0.10
  -5 -19   2    2.27    0.09
  -4 -19   2    1.99    0.09
  -4 -19   2    2.01    0.10
   3  19  -2    0.39    0.05
   3  19  -2    0.39    0.05
  -3 -19   2    0.33    0.05
   2  19  -2    2.73    0.11
  -2 -19   2    2.64    0.12
   1  19  -2    3.49    0.14
   1  19  -2    3.47    0.14
   1  19  -2    3.40    0.14
  -1 -19   2    3.48    0.14
   0  19  -2    1.03    0.06
   0  19  -2    1.04    0.08
   0  19  -2    0.98    0.07
  -1  19  -2    3.74    0.14
  -1  19  -2    3.67    0.15
   1 -19   2    3.60    0.13
  -2  19  -2    0.25    0.03
  -2  19  -2    0.20    0.04
  -2  19  -2    0.21    0.04
  -2  19  -2    0.17    0.03
  -2  19  -2    0.28    0.06
   2 -19   2    0.25    0.03
  -3  19  -2    0.07    0.04
  -3  19  -2    0.09    0.03
  -3  19  -2    0.10    0.03
   3 -19   2    0.08    0.02
  -4  19  -2   26.55    0.93
  -4  19  -2   27.74    0.85
  -4  19  -2   28.26    0.86
  -4  19  -2   27.75    0.87
  -4  19  -2   27.72    0.86
   4 -19   2   27.46    0.90
  -5  19  -2   27.06    0.83
  -5  19  -2   26.77    0.84
  -5  19  -2   27.12    0.86
   5 -19   2   27.70    0.89
  -6  19  -2    0.76    0.04
  -6  19  -2    0.86    0.04
   7  18  -2    0.28    0.04
  -7 -18   2    0.40    0.04
   6  18  -2    0.02    0.02
  -6 -18   2   -0.01    0.03
  -6 -18   2    0.01    0.02
   5  18  -2    5.54    0.21
   5  18  -2    5.72    0.19
  -5 -18   2    5.79    0.23
  -5 -18   2    5.70    0.19
  -5 -18   2    5.70    0.20
   4  18  -2    0.04    0.03
   4  18  -2    0.08    0.05
  -4 -18   2    0.04    0.03
   3  18  -2    0.01    0.02
   3  18  -2    0.01    0.04
  -3 -18   2    0.06    0.03
  -3 -18   2    0.05    0.04
   2  18  -2    0.06    0.03
   2  18  -2   -0.03    0.06
  -2 -18   2    0.04    0.02
   1  18  -2    0.19    0.03
   1  18  -2    0.22    0.05
  -1 -18   2    0.22    0.03
   0  18  -2    0.07    0.02
   0  18  -2    0.13    0.04
  -1  18  -2    0.01    0.05
  -1  18  -2    0.06    0.03
  -1  18  -2    0.01    0.02
  -1  18  -2    0.02    0.03
   1 -18   2    0.05    0.02
  -2  18  -2    2.87    0.14
  -2  18  -2    3.02    0.12
  -2  18  -2    2.93    0.12
  -2  18  -2    3.18    0.13
  -2  18  -2    3.11    0.11
  -3  18  -2    0.68    0.06
  -3  18  -2    0.66    0.05
  -3  18  -2    0.66    0.06
  -3  18  -2    0.68    0.07
   3 -18   2    0.75    0.05
  -4  18  -2    2.54    0.12
  -4  18  -2    2.43    0.09
  -4  18  -2    2.40    0.10
  -5  18  -2    0.04    0.03
  -5  18  -2    0.11    0.02
  -5  18  -2    0.10    0.02
  -5  18  -2    0.12    0.02
   5 -18   2    0.09    0.02
  -6  18  -2    0.03    0.02
  -6  18  -2    0.02    0.02
  -7  18  -2    6.42    0.20
   7  17  -2    0.01    0.02
  -7 -17   2    0.01    0.02
  -7 -17   2    0.01    0.02
   6  17  -2    4.26    0.15
   6  17  -2    4.43    0.17
  -6 -17   2    4.35    0.15
  -6 -17   2    4.35    0.15
   5  17  -2   12.94    0.46
   5  17  -2   12.78    0.41
  -5 -17   2   13.12    0.41
  -5 -17   2   13.13    0.47
   4  17  -2    0.20    0.06
  -4 -17   2    0.14    0.03
  -4 -17   2    0.13    0.03
  -3 -17   2    1.72    0.09
  -2 -17   2    3.81    0.15
   1  17  -2   10.28    0.35
   0  17  -2    3.11    0.12
  -1  17  -2    1.44    0.08
  -1  17  -2    1.45    0.07
   1 -17   2    1.41    0.06
  -2  17  -2    4.59    0.15
  -2  17  -2    4.66    0.16
  -2  17  -2    4.42    0.18
   2 -17   2    4.41    0.16
  -3  17  -2    7.89    0.27
  -3  17  -2    7.88    0.31
  -3  17  -2    7.68    0.28
  -3  17  -2    7.57    0.27
  -3  17  -2    8.24    0.26
   3 -17   2    8.07    0.27
  -4  17  -2   16.33    0.60
  -4  17  -2   14.62    0.51
  -4  17  -2   16.36    0.50
  -4  17  -2   16.09    0.52
  -4  17  -2   16.22    0.54
  -4  17  -2   16.47    0.48
   4 -17   2   15.52    0.53
  -5  17  -2    0.50    0.05
  -5  17  -2    0.59    0.04
  -5  17  -2    0.53    0.04
  -5  17  -2    0.52    0.04
   5 -17   2    0.57    0.04
  -6  17  -2    8.90    0.29
   6 -17   2    9.15    0.31
  -7  17  -2    8.58    0.27
  -8 -16   2    2.26    0.07
  -8 -16   2    1.87    0.08
  -7 -16   2    0.87    0.05
   6  16  -2    1.35    0.07
  -6 -16   2    1.29    0.08
  -6 -16   2    1.24    0.07
  -6 -16   2    1.27    0.07
   5  16  -2    0.44    0.05
   5  16  -2    0.48    0.04
  -5 -16   2    0.35    0.05
  -5 -16   2    0.42    0.05
   4  16  -2    0.49    0.04
  -4 -16   2    0.55    0.05
   3  16  -2    0.65    0.07
   3  16  -2    0.59    0.07
   3  16  -2    0.55    0.04
  -3 -16   2    0.80    0.07
  -3 -16   2    0.52    0.05
  -3 -16   2    0.83    0.12
   2  16  -2   15.41    0.56
   2  16  -2   17.14    0.55
  -2 -16   2   15.40    0.63
  -2 -16   2   17.17    0.57
  -1 -16   2    3.67    0.17
   0  16  -2    0.46    0.04
  -1  16  -2    0.05    0.02
   1 -16   2    0.03    0.02
  -2  16  -2    8.94    0.36
  -2  16  -2    9.90    0.36
  -2  16  -2    9.24    0.31
   2 -16   2    9.46    0.31
  -3  16  -2    0.06    0.03
  -3  16  -2    0.13    0.04
  -3  16  -2    0.12    0.02
  -3  16  -2    0.15    0.03
  -3  16  -2    0.04    0.05
   3 -16   2    0.07    0.02
  -4  16  -2    0.06    0.03
  -4  16  -2    0.06    0.04
  -4  16  -2    0.08    0.03
  -4  16  -2    0.08    0.03
  -4  16  -2    0.03    0.06
   4 -16   2    0.02    0.02
  -5  16  -2    1.26    0.06
  -5  16  -2    1.24    0.06
  -5  16  -2    1.35    0.07
  -5  16  -2    1.22    0.06
   5 -16   2    1.21    0.06
  -6  16  -2    1.44    0.07
  -6  16  -2    1.52    0.06
  -6  16  -2    1.49    0.06
  -7  16  -2    0.03    0.02
   7  15  -2    0.14    0.03
  -7 -15   2    0.21    0.02
  -7 -15   2    0.20    0.04
   6  15  -2    0.03    0.02
   6  15  -2    0.08    0.03
  -6 -15   2    0.05    0.03
  -6 -15   2    0.05    0.03
  -6 -15   2    0.02    0.03
   5  15  -2    1.86    0.08
   5  15  -2    1.86    0.08
  -5 -15   2    1.82    0.10
  -5 -15   2    1.67    0.09
   4  15  -2    5.26    0.19
  -4 -15   2    5.19    0.21
   3  15  -2    6.13    0.21
  -3 -15   2    5.73    0.26
  -3 -15   2    5.82    0.22
   2  15  -2    3.47    0.14
   2  15  -2    4.16    0.14
  -2 -15   2    3.82    0.17
   0  15  -2   10.86    0.37
   0 -15   2   10.13    0.35
   0 -15   2   11.14    0.41
  -1  15  -2   14.70    0.50
   1 -15   2   14.97    0.49
  -2  15  -2    0.01    0.01
   2 -15   2    0.03    0.02
  -3  15  -2    8.47    0.31
  -3  15  -2    8.21    0.27
  -3  15  -2    7.82    0.28
  -3  15  -2    7.68    0.26
   3 -15   2    8.30    0.28
  -4  15  -2    2.53    0.11
  -4  15  -2    2.44    0.11
  -4  15  -2    2.43    0.10
  -4  15  -2    2.52    0.10
  -4  15  -2    2.54    0.09
  -4  15  -2    2.55    0.09
   4 -15   2    2.43    0.10
  -5  15  -2    0.25    0.04
  -5  15  -2    0.28    0.05
  -5  15  -2    0.22    0.03
  -6  15  -2    3.96    0.15
  -6  15  -2    4.08    0.14
   6 -15   2    3.87    0.15
  -7  15  -2    8.28    0.25
  -7  15  -2    8.01    0.25
  -7  15  -2    7.96    0.26
  -8 -14   2    1.93    0.07
  -7 -14   2    0.03    0.02
  -7 -14   2    0.06    0.03
  -7 -14   2    0.05    0.02
   6  14  -2    0.41    0.04
   6  14  -2    0.32    0.04
  -6 -14   2    0.22    0.04
  -6 -14   2    0.31    0.04
  -6 -14   2    0.35    0.07
  -6 -14   2    0.27    0.03
   5  14  -2    3.03    0.13
   5  14  -2    3.21    0.12
  -5 -14   2    3.08    0.14
  -5 -14   2    3.07    0.12
   4  14  -2    3.01    0.12
  -4 -14   2    2.93    0.13
  -4 -14   2    2.98    0.12
   3  14  -2   10.54    0.34
   3  14  -2    9.86    0.35
  -3 -14   2    9.70    0.36
  -3 -14   2    9.60    0.39
   2  14  -2    0.36    0.04
   2  14  -2    0.31    0.04
   1  14  -2   -0.01    0.03
   1  14  -2    0.01    0.02
   1  14  -2    0.00    0.04
   0  14  -2    3.22    0.15
   0  14  -2    3.19    0.12
   0 -14   2    3.20    0.13
   0 -14   2    2.98    0.11
   1 -14   2   15.44    0.50
  -2  14  -2   32.01    1.14
   2 -14   2   29.79    1.00
  -3  14  -2    1.94    0.08
  -3  14  -2    1.65    0.09
  -3  14  -2    1.81    0.09
   3 -14   2    1.87    0.08
  -4  14  -2    0.90    0.05
  -4  14  -2    1.00    0.07
  -4  14  -2    0.87    0.08
  -4  14  -2    0.98    0.06
  -4  14  -2    0.96    0.06
   4 -14   2    0.93    0.05
  -5  14  -2    1.85    0.09
  -5  14  -2    1.82    0.08
  -5  14  -2    1.73    0.08
  -5  14  -2    1.86    0.07
  -5  14  -2    1.70    0.10
  -5  14  -2    1.80    0.08
   5 -14   2    1.78    0.08
  -6  14  -2    1.98    0.08
  -6  14  -2    2.03    0.08
  -6  14  -2    1.83    0.08
  -6  14  -2    1.74    0.09
   6 -14   2    1.76    0.08
  -7  14  -2    9.49    0.30
  -7  14  -2    9.58    0.29
  -7  14  -2    9.89    0.30
  -8 -13   2    4.66    0.15
  -8 -13   2    4.71    0.15
  -8 -13   2    4.58    0.15
  -7 -13   2    2.58    0.10
  -7 -13   2    2.59    0.10
  -7 -13   2    2.61    0.12
   6  13  -2    1.07    0.07
   6  13  -2    1.10    0.06
  -6 -13   2    1.00    0.10
  -6 -13   2    1.01    0.07
  -6 -13   2    0.99    0.07
  -6 -13   2    1.28    0.08
   5  13  -2    0.83    0.05
  -5 -13   2    0.77    0.06
   4  13  -2    5.63    0.21
  -4 -13   2    5.58    0.22
   3  13  -2    4.35    0.16
   3  13  -2    4.19    0.16
  -3 -13   2    3.99    0.18
   2  13  -2    1.03    0.06
   2  13  -2    0.99    0.05
  -2 -13   2    1.01    0.05
   1  13  -2  111.38    3.85
   1  13  -2  114.12    4.19
   1  13  -2  116.00    3.72
   0  13  -2    7.27    0.28
   0  13  -2    7.34    0.25
   0 -13   2    7.48    0.28
   0 -13   2    7.24    0.24
  -1  13  -2    6.53    0.27
  -1  13  -2    7.07    0.26
   1 -13   2    7.11    0.23
  -2  13  -2   40.51    1.34
  -2  13  -2   42.38    1.50
   2 -13   2   39.40    1.32
  -3  13  -2    0.82    0.05
  -4  13  -2    1.16    0.07
  -4  13  -2    0.99    0.06
  -4  13  -2    1.12    0.08
  -4  13  -2    1.24    0.06
  -4  13  -2    1.04    0.06
  -4  13  -2    1.07    0.06
  -5  13  -2    0.42    0.04
  -5  13  -2    0.41    0.05
  -5  13  -2    0.50    0.06
  -5  13  -2    0.47    0.06
  -5  13  -2    0.55    0.05
   5 -13   2    0.47    0.04
  -6  13  -2    7.10    0.24
  -6  13  -2    7.11    0.22
  -6  13  -2    6.48    0.23
   6 -13   2    7.21    0.25
  -7  13  -2    0.18    0.03
  -7  13  -2    0.14    0.02
   7 -13   2    0.16    0.03
   8  12  -2    1.37    0.06
  -8 -12   2    1.35    0.06
  -8 -12   2    1.37    0.06
   7  12  -2    0.79    0.05
  -7 -12   2    0.74    0.05
  -7 -12   2    0.67    0.06
  -7 -12   2    0.69    0.05
   6  12  -2    0.71    0.05
   6  12  -2    0.68    0.06
  -6 -12   2    0.64    0.06
  -6 -12   2    0.61    0.05
  -6 -12   2    0.65    0.06
  -6 -12   2    0.73    0.09
   5  12  -2    0.67    0.05
  -5 -12   2    0.68    0.06
   4  12  -2   11.11    0.40
   4  12  -2   11.44    0.36
  -4 -12   2   11.35    0.41
   3  12  -2   19.88    0.67
  -3 -12   2   19.33    0.74
   2  12  -2   10.49    0.36
  -2 -12   2   10.44    0.37
   1  12  -2    0.96    0.06
   0  12  -2    0.92    0.05
   0  12  -2    0.95    0.05
   0 -12   2    0.90    0.05
  -1  12  -2   76.88    2.84
  -1  12  -2   79.63    2.53
  -1  12  -2   73.88    2.83
   1 -12   2   78.56    2.48
  -2  12  -2   16.31    0.59
  -2  12  -2   15.73    0.53
   2 -12   2   15.80    0.60
  -3  12  -2    0.17    0.02
  -4  12  -2   10.22    0.34
  -4  12  -2   10.38    0.39
  -4  12  -2   10.29    0.33
  -5  12  -2    5.00    0.20
  -5  12  -2    4.98    0.15
  -5  12  -2    4.81    0.18
  -5  12  -2    4.94    0.17
  -5  12  -2    4.64    0.16
  -5  12  -2    4.68    0.17
  -6  12  -2    6.01    0.20
  -6  12  -2    5.99    0.21
  -6  12  -2    6.33    0.19
   6 -12   2    5.86    0.19
   6 -12   2    6.18    0.22
  -7  12  -2    3.38    0.12
  -7  12  -2    3.27    0.11
   7 -12   2    3.60    0.11
  -8  12  -2    0.22    0.02
   8  11  -2    0.35    0.03
  -8 -11   2    0.31    0.03
  -8 -11   2    0.34    0.04
  -8 -11   2    0.28    0.03
   7  11  -2    3.31    0.11
  -7 -11   2    3.32    0.12
  -7 -11   2    3.20    0.12
   6  11  -2   -0.04    0.04
   6  11  -2    0.03    0.02
  -6 -11   2    0.05    0.03
  -6 -11   2    0.03    0.03
  -6 -11   2    0.04    0.05
  -6 -11   2   -0.01    0.03
   5  11  -2    0.80    0.05
  -5 -11   2    0.90    0.06
   4  11  -2   14.94    0.52
  -4 -11   2   14.76    0.52
   3  11  -2    1.33    0.06
  -3 -11   2    1.27    0.07
   2  11  -2   18.44    0.63
   2  11  -2   18.58    0.65
  -2 -11   2   20.08    0.66
   1  11  -2   11.63    0.44
   0  11  -2    5.65    0.23
   0  11  -2    5.82    0.21
   0 -11   2    6.25    0.23
  -1  11  -2   41.59    1.57
  -1  11  -2   43.42    1.56
  -1  11  -2   42.91    1.40
   1 -11   2   40.72    1.37
   1 -11   2   43.85    1.57
  -2  11  -2   10.90    0.39
  -2  11  -2   12.20    0.43
  -2  11  -2   11.10    0.43
  -3  11  -2    2.83    0.12
  -3  11  -2    2.94    0.11
  -3  11  -2    2.96    0.12
  -4  11  -2    0.72    0.07
  -4  11  -2    0.79    0.05
  -4  11  -2    0.85    0.05
  -4  11  -2    0.89    0.06
  -5  11  -2    0.45    0.05
  -5  11  -2    0.33    0.04
  -5  11  -2    0.41    0.04
  -5  11  -2    0.45    0.05
  -5  11  -2    0.47    0.05
  -5  11  -2    0.46    0.05
  -5  11  -2    0.38    0.05
  -6  11  -2    0.24    0.03
  -6  11  -2    0.26    0.04
  -6  11  -2    0.34    0.03
  -6  11  -2    0.27    0.04
  -6  11  -2    0.26    0.03
   6 -11   2    0.25    0.04
   6 -11   2    0.25    0.04
  -7  11  -2    0.85    0.05
  -7  11  -2    0.99    0.05
  -7  11  -2    0.98    0.05
   7 -11   2    0.92    0.05
  -8  11  -2    2.42    0.08
  -8  11  -2    2.38    0.08
   8 -11   2    2.35    0.08
   8  10  -2    3.68    0.12
  -8 -10   2    3.84    0.13
  -8 -10   2    3.81    0.13
  -8 -10   2    3.70    0.13
   7  10  -2    0.42    0.04
  -7 -10   2    0.42    0.09
  -7 -10   2    0.39    0.05
  -7 -10   2    0.40    0.05
   6  10  -2    0.04    0.02
  -6 -10   2    0.11    0.05
  -6 -10   2    0.09    0.03
  -6 -10   2    0.08    0.03
   5  10  -2    0.02    0.02
  -5 -10   2    0.01    0.03
   4  10  -2   15.15    0.53
   3  10  -2    4.35    0.16
  -3 -10   2    4.24    0.16
   2  10  -2    2.57    0.10
   2  10  -2    2.57    0.10
   2  10  -2    2.52    0.11
  -2 -10   2    2.75    0.10
   1  10  -2    0.47    0.04
  -1 -10   2    0.44    0.03
   0  10  -2   59.10    2.16
   0  10  -2   58.54    1.92
   0 -10   2   58.71    2.17
  -1  10  -2   16.04    0.57
  -1  10  -2   15.05    0.57
  -1  10  -2   14.63    0.51
   1 -10   2   15.01    0.50
   1 -10   2   15.79    0.57
  -2  10  -2   26.69    0.98
  -2  10  -2   26.47    0.99
  -3  10  -2   20.49    0.71
  -3  10  -2   21.68    0.77
  -3  10  -2   19.83    0.69
  -4  10  -2    2.20    0.09
  -4  10  -2    2.18    0.09
  -4  10  -2    1.96    0.10
  -4  10  -2    2.07    0.10
  -5  10  -2    0.34    0.04
  -5  10  -2    0.36    0.04
  -5  10  -2    0.38    0.04
  -5  10  -2    0.29    0.03
  -5  10  -2    0.39    0.05
  -5  10  -2    0.36    0.05
  -6  10  -2    0.08    0.03
  -6  10  -2    0.02    0.02
  -6  10  -2    0.09    0.04
  -6  10  -2    0.03    0.02
  -6  10  -2    0.02    0.02
  -6  10  -2    0.08    0.04
   6 -10   2    0.02    0.02
   6 -10   2    0.08    0.03
  -7  10  -2    8.41    0.27
  -7  10  -2    8.27    0.26
   7 -10   2    8.38    0.29
   7 -10   2    8.17    0.25
  -8  10  -2    0.38    0.03
  -8  10  -2    0.38    0.03
   8 -10   2    0.40    0.03
  -8  -9   2    1.80    0.07
  -8  -9   2    1.92    0.08
   7   9  -2    1.19    0.06
  -7  -9   2    1.22    0.07
  -7  -9   2    1.20    0.08
  -7  -9   2    1.20    0.13
  -7  -9   2    1.21    0.07
   6   9  -2    6.43    0.24
  -6  -9   2    6.30    0.22
  -6  -9   2    6.10    0.26
  -6  -9   2    6.53    0.25
   5   9  -2    7.40    0.25
   5   9  -2    7.60    0.27
  -5  -9   2    7.55    0.28
   4   9  -2   14.32    0.55
   4   9  -2   14.17    0.50
   3   9  -2    7.21    0.26
  -3  -9   2    7.22    0.26
   2   9  -2    3.73    0.16
   2   9  -2    3.69    0.14
  -2  -9   2    3.95    0.15
  -2  -9   2    3.82    0.14
   1   9  -2    7.30    0.28
  -1  -9   2    7.44    0.28
   0   9  -2    0.21    0.03
   0   9  -2    0.14    0.02
   0  -9   2    0.20    0.02
  -1   9  -2    1.33    0.06
  -1   9  -2    1.44    0.06
  -1   9  -2    1.41    0.06
   1  -9   2    1.34    0.05
   1  -9   2    1.36    0.06
  -2   9  -2   38.00    1.39
  -2   9  -2   36.47    1.24
  -2   9  -2   38.20    1.29
  -2   9  -2   38.44    1.40
   2  -9   2   38.16    1.40
  -3   9  -2   24.74    0.93
  -3   9  -2   25.74    0.87
  -4   9  -2    4.13    0.16
  -4   9  -2    4.14    0.16
  -5   9  -2   10.63    0.35
  -5   9  -2   10.96    0.35
  -5   9  -2   10.64    0.36
  -5   9  -2   11.10    0.39
  -5   9  -2   11.24    0.41
  -5   9  -2   10.53    0.32
  -6   9  -2    0.67    0.07
  -6   9  -2    0.64    0.07
  -6   9  -2    0.66    0.05
  -6   9  -2    0.69    0.05
   6  -9   2    0.67    0.05
  -7   9  -2    4.60    0.18
  -7   9  -2    4.74    0.15
  -7   9  -2    4.52    0.16
   7  -9   2    4.58    0.15
   7  -9   2    4.67    0.17
  -8   9  -2    1.55    0.06
  -8   9  -2    1.58    0.06
  -8  -8   2    2.16    0.08
  -8  -8   2    1.90    0.10
  -8  -8   2    2.02    0.08
   7   8  -2    0.06    0.03
   7   8  -2    0.04    0.02
  -7  -8   2    0.01    0.03
  -7  -8   2    0.03    0.03
  -7  -8   2    0.12    0.07
  -7  -8   2    0.02    0.03
  -7  -8   2    0.02    0.03
   6   8  -2    0.16    0.03
  -6  -8   2    0.22    0.04
  -6  -8   2    0.28    0.05
   5   8  -2   11.35    0.39
   5   8  -2   10.07    0.44
   5   8  -2   10.75    0.35
  -5  -8   2   11.51    0.40
   4   8  -2    8.46    0.30
   4   8  -2    8.39    0.33
   3   8  -2    0.19    0.03
  -3  -8   2    0.17    0.03
   2   8  -2   12.80    0.45
  -2  -8   2   13.11    0.45
   1   8  -2    4.90    0.19
   1   8  -2    4.86    0.19
  -1  -8   2    5.13    0.19
   0   8  -2    2.55    0.10
   0   8  -2    2.50    0.10
   0  -8   2    2.62    0.10
  -1   8  -2   10.87    0.41
  -1   8  -2   11.21    0.41
   1  -8   2   11.04    0.41
  -2   8  -2    1.95    0.08
  -2   8  -2    1.99    0.08
  -2   8  -2    1.97    0.08
  -2   8  -2    1.86    0.08
   2  -8   2    1.99    0.08
  -3   8  -2    2.22    0.09
  -3   8  -2    2.33    0.09
  -4   8  -2    0.22    0.03
  -5   8  -2    1.57    0.09
  -5   8  -2    1.53    0.07
  -5   8  -2    1.64    0.08
  -5   8  -2    1.63    0.08
  -6   8  -2    0.02    0.03
  -6   8  -2    0.03    0.02
  -6   8  -2    0.03    0.04
  -6   8  -2    0.04    0.03
  -7   8  -2    6.40    0.22
  -7   8  -2    6.28    0.20
  -7   8  -2    6.81    0.24
  -7   8  -2    6.36    0.21
   7  -8   2    6.47    0.23
   7  -8   2    6.49    0.20
  -8   8  -2    4.97    0.16
  -8   8  -2    5.08    0.16
  -9  -7   2    2.45    0.09
  -9  -7   2    2.79    0.09
  -8  -7   2    0.40    0.04
  -8  -7   2    0.51    0.05
  -8  -7   2    0.51    0.04
   7   7  -2    0.30    0.04
  -7  -7   2    0.27    0.07
  -7  -7   2    0.35    0.05
  -7  -7   2    0.34    0.05
  -7  -7   2    0.35    0.05
  -7  -7   2    0.33    0.05
   6   7  -2    2.13    0.09
  -6  -7   2    1.91    0.10
  -6  -7   2    2.10    0.11
   5   7  -2    1.19    0.10
   5   7  -2    1.22    0.06
  -5  -7   2    1.03    0.07
   4   7  -2   19.75    0.68
   4   7  -2   19.72    0.74
  -3  -7   2    0.11    0.02
  -2  -7   2    0.20    0.03
   1   7  -2   28.40    1.05
  -1  -7   2   28.37    1.05
   0   7  -2    4.17    0.17
   0   7  -2    4.20    0.16
   0  -7   2    4.38    0.17
  -1   7  -2   36.68    1.38
  -1   7  -2   37.28    1.37
  -1   7  -2   37.83    1.38
   1  -7   2   37.62    1.38
  -2   7  -2   19.79    0.74
  -2   7  -2   20.52    0.69
  -2   7  -2   20.12    0.74
   2  -7   2   19.59    0.74
  -3   7  -2    6.30    0.23
  -3   7  -2    6.22    0.25
  -3   7  -2    6.87    0.25
  -4   7  -2    3.58    0.14
  -5   7  -2    0.31    0.05
  -5   7  -2    0.26    0.04
  -5   7  -2    0.25    0.03
  -5   7  -2    0.25    0.05
  -5   7  -2    0.22    0.04
  -6   7  -2    0.30    0.04
  -6   7  -2    0.27    0.04
  -6   7  -2    0.36    0.05
  -6   7  -2    0.29    0.04
  -6   7  -2    0.33    0.05
  -6   7  -2    0.30    0.04
  -7   7  -2   11.09    0.33
  -7   7  -2   10.92    0.35
  -7   7  -2   10.48    0.39
  -7   7  -2   10.64    0.36
   7  -7   2   10.93    0.37
   7  -7   2   11.12    0.33
  -8   7  -2    0.88    0.04
  -8   7  -2    0.91    0.04
   9   6  -2    2.37    0.08
  -9  -6   2    2.47    0.09
  -9  -6   2    2.45    0.08
   8   6  -2    1.54    0.06
  -8  -6   2    1.51    0.07
  -8  -6   2    1.52    0.08
  -8  -6   2    1.31    0.06
   7   6  -2    8.24    0.30
  -7  -6   2    8.15    0.27
  -7  -6   2    7.73    0.34
  -7  -6   2    8.70    0.27
  -7  -6   2    8.44    0.31
  -7  -6   2    8.40    0.28
   6   6  -2    1.42    0.09
   6   6  -2    1.22    0.07
  -6  -6   2    1.19    0.07
  -6  -6   2    1.33    0.08
   5   6  -2    0.84    0.09
   5   6  -2    0.98    0.06
  -5  -6   2    1.23    0.07
  -5  -6   2    1.00    0.06
   4   6  -2    0.69    0.04
  -4  -6   2    0.66    0.05
   3   6  -2    0.28    0.03
  -3  -6   2    0.32    0.03
  -3  -6   2    0.25    0.04
   2   6  -2    0.72    0.04
   1   6  -2   31.89    1.18
  -1  -6   2   32.02    1.18
   0   6  -2    5.22    0.19
   0   6  -2    5.18    0.19
   0  -6   2    4.95    0.19
  -1   6  -2   19.77    0.75
  -1   6  -2   20.58    0.74
  -1   6  -2   20.25    0.75
   1  -6   2   20.47    0.75
  -2   6  -2   14.71    0.50
  -2   6  -2   14.66    0.54
  -2   6  -2   14.17    0.54
   2  -6   2   14.89    0.54
  -3   6  -2   14.54    0.48
  -3   6  -2   13.87    0.51
  -3   6  -2   13.00    0.52
   3  -6   2   13.48    0.51
  -5   6  -2    4.51    0.17
  -5   6  -2    4.54    0.18
  -5   6  -2    4.82    0.17
  -5   6  -2    4.72    0.18
  -5   6  -2    5.13    0.19
  -5   6  -2    4.77    0.16
  -5   6  -2    4.39    0.17
  -6   6  -2    0.67    0.08
  -6   6  -2    0.66    0.06
  -6   6  -2    0.70    0.05
  -6   6  -2    0.66    0.05
  -6   6  -2    0.65    0.05
  -7   6  -2    3.15    0.11
  -7   6  -2    3.33    0.12
  -7   6  -2    3.25    0.13
   7  -6   2    3.24    0.11
   7  -6   2    3.21    0.13
  -8   6  -2    3.61    0.11
  -8   6  -2    3.42    0.12
   8  -6   2    3.53    0.11
   8  -6   2    3.20    0.13
   9   5  -2    1.67    0.06
  -9  -5   2    1.74    0.06
  -9  -5   2    1.74    0.06
   8   5  -2    0.23    0.03
  -8  -5   2    0.22    0.03
  -8  -5   2    0.26    0.04
  -8  -5   2    0.19    0.03
  -8  -5   2    0.32    0.04
   7   5  -2    3.09    0.13
  -7  -5   2    3.11    0.12
  -7  -5   2    2.94    0.12
  -7  -5   2    2.97    0.13
  -7  -5   2    3.02    0.12
  -7  -5   2    2.87    0.15
   6   5  -2    0.68    0.05
  -6  -5   2    0.63    0.06
  -6  -5   2    0.60    0.06
  -6  -5   2    0.66    0.05
   5   5  -2    0.90    0.09
   5   5  -2    0.94    0.06
  -5  -5   2    0.96    0.06
  -5  -5   2    1.02    0.06
   4   5  -2    5.81    0.19
  -4  -5   2    4.62    0.19
   3   5  -2   22.47    0.80
  -3  -5   2   23.93    0.87
  -3  -5   2   23.59    0.80
   2   5  -2    4.76    0.18
  -2  -5   2    4.74    0.18
   1   5  -2    2.72    0.10
  -1  -5   2    2.42    0.10
   0   5  -2   12.69    0.46
   0   5  -2   12.30    0.46
   0  -5   2   12.35    0.46
  -1   5  -2   34.85    1.27
  -1   5  -2   34.16    1.26
  -1   5  -2   33.35    1.26
   1  -5   2   34.19    1.26
  -2   5  -2   58.99    2.20
  -2   5  -2   58.99    2.19
   2  -5   2   61.12    2.20
  -3   5  -2    1.90    0.08
  -3   5  -2    1.89    0.09
  -3   5  -2    2.09    0.08
   3  -5   2    1.97    0.08
  -4   5  -2    0.05    0.02
   4  -5   2    0.06    0.03
  -5   5  -2    5.29    0.20
  -5   5  -2    5.84    0.21
  -5   5  -2    5.28    0.19
  -5   5  -2    5.43    0.19
  -5   5  -2    4.62    0.19
  -5   5  -2    5.33    0.20
  -6   5  -2    0.32    0.04
  -6   5  -2    0.35    0.04
  -6   5  -2    0.38    0.06
  -6   5  -2    0.21    0.03
  -7   5  -2    0.09    0.02
  -7   5  -2    0.08    0.02
  -7   5  -2    0.07    0.03
   7  -5   2    0.09    0.02
  -8   5  -2    2.04    0.08
  -8   5  -2    2.01    0.07
   8  -5   2    2.00    0.07
   9   4  -2    0.00    0.01
  -9  -4   2    0.00    0.01
  -9  -4   2    0.01    0.01
  -9  -4   2    0.01    0.01
   8   4  -2    3.01    0.10
  -8  -4   2    2.99    0.11
  -8  -4   2    2.79    0.12
  -8  -4   2    3.05    0.11
  -8  -4   2    2.84    0.11
   7   4  -2   22.20    0.76
  -7  -4   2   22.72    0.67
  -7  -4   2   22.90    0.69
  -7  -4   2   20.90    0.83
  -7  -4   2   21.91    0.77
  -7  -4   2   21.48    0.68
   6   4  -2   -0.01    0.02
  -6  -4   2    0.01    0.02
  -6  -4   2   -0.01    0.03
   5   4  -2    0.67    0.05
  -5  -4   2    0.72    0.05
  -5  -4   2    0.92    0.05
   4   4  -2    0.43    0.04
  -4  -4   2    0.52    0.04
   3   4  -2   26.15    0.95
   3   4  -2   28.81    1.03
  -3  -4   2   28.24    1.03
   1   4  -2   10.31    0.38
  -1  -4   2   10.17    0.38
   0   4  -2   18.95    0.70
   0   4  -2   19.35    0.70
   0  -4   2   18.60    0.70
   0  -4   2   18.93    0.70
  -1   4  -2    0.23    0.02
  -1   4  -2    0.23    0.01
  -1   4  -2    0.26    0.01
   1  -4   2    0.23    0.01
  -2   4  -2    4.96    0.19
  -2   4  -2    5.02    0.19
  -2   4  -2    4.97    0.19
   2  -4   2    5.04    0.19
  -3   4  -2   35.66    1.16
  -3   4  -2   33.87    1.24
  -3   4  -2   32.17    1.25
   3  -4   2   33.77    1.25
  -4   4  -2   31.72    1.17
  -4   4  -2   31.60    1.09
   4  -4   2   32.13    1.18
  -5   4  -2    0.43    0.04
  -5   4  -2    0.32    0.04
  -5   4  -2    0.39    0.06
  -6   4  -2    0.46    0.05
  -6   4  -2    0.50    0.05
  -6   4  -2    0.61    0.06
  -6   4  -2    0.49    0.04
  -7   4  -2    0.43    0.04
  -7   4  -2    0.44    0.04
  -7   4  -2    0.38    0.04
   7  -4   2    0.47    0.05
   7  -4   2    0.44    0.04
  -8   4  -2    0.21    0.03
  -8   4  -2    0.31    0.03
   8  -4   2    0.25    0.03
   9   3  -2    0.37    0.03
  -9  -3   2    0.39    0.03
  -9  -3   2    0.38    0.03
  -9  -3   2    0.37    0.03
   8   3  -2    2.02    0.08
  -8  -3   2    1.95    0.08
  -8  -3   2    1.82    0.09
  -8  -3   2    1.89    0.08
   7   3  -2    2.49    0.11
  -7  -3   2    2.40    0.13
  -7  -3   2    2.65    0.10
  -7  -3   2    2.61    0.12
  -7  -3   2    2.41    0.10
   6   3  -2    0.51    0.05
  -6  -3   2    0.56    0.05
  -6  -3   2    0.65    0.06
   5   3  -2    0.12    0.03
  -5  -3   2    0.16    0.03
  -5  -3   2    0.08    0.03
   4   3  -2    2.22    0.09
  -4  -3   2    2.34    0.09
  -4  -3   2    2.03    0.11
   3   3  -2   74.39    2.46
   3   3  -2   74.17    2.68
  -3  -3   2   67.00    2.46
  -3  -3   2   74.50    2.67
   2   3  -2    9.83    0.37
  -2  -3   2    9.98    0.37
   1   3  -2   61.83    2.27
   1   3  -2   59.74    2.27
  -1  -3   2   62.03    2.28
  -1  -3   2   62.51    2.27
   0   3  -2    1.88    0.07
   0   3  -2    2.01    0.07
   0  -3   2    1.91    0.07
  -1   3  -2   22.89    0.82
  -1   3  -2   21.70    0.82
  -1   3  -2   21.24    0.81
   1  -3   2   22.91    0.82
  -2   3  -2   58.51    2.12
  -2   3  -2   56.57    2.10
  -2   3  -2   55.17    2.10
   2  -3   2   58.21    2.10
  -3   3  -2   20.98    0.75
  -3   3  -2   19.75    0.76
  -3   3  -2   20.05    0.70
   3  -3   2   20.82    0.76
  -4   3  -2    1.86    0.08
  -4   3  -2    1.77    0.08
   4  -3   2    1.75    0.08
   4  -3   2    1.85    0.09
  -5   3  -2    1.98    0.09
  -5   3  -2    1.95    0.09
  -5   3  -2    1.83    0.10
   5  -3   2    1.93    0.09
  -6   3  -2    0.64    0.07
  -6   3  -2    0.47    0.05
  -6   3  -2    0.56    0.05
  -6   3  -2    0.51    0.05
  -7   3  -2    0.00    0.02
  -7   3  -2    0.00    0.02
  -7   3  -2    0.01    0.02
   7  -3   2    0.04    0.03
   7  -3   2    0.01    0.02
  -8   3  -2    4.79    0.16
  -8   3  -2    4.77    0.15
   8  -3   2    4.70    0.15
   9   2  -2    0.12    0.01
  -9  -2   2    0.10    0.02
  -9  -2   2    0.10    0.01
   8   2  -2    2.90    0.10
   8   2  -2    2.83    0.12
  -8  -2   2    2.84    0.12
  -8  -2   2    2.97    0.11
  -8  -2   2    3.05    0.11
  -7  -2   2    1.09    0.07
  -7  -2   2    1.14    0.06
  -7  -2   2    1.07    0.07
  -7  -2   2    1.05    0.09
  -7  -2   2    1.00    0.06
   6   2  -2    6.49    0.23
  -6  -2   2    5.79    0.23
  -6  -2   2    6.57    0.21
  -6  -2   2    6.38    0.25
  -6  -2   2    5.99    0.21
  -6  -2   2    5.94    0.20
   5   2  -2    1.11    0.06
  -5  -2   2    1.13    0.06
  -5  -2   2    1.19    0.06
   4   2  -2   14.70    0.50
  -4  -2   2   14.37    0.54
  -4  -2   2   13.86    0.54
  -4  -2   2   14.67    0.50
   3   2  -2    3.58    0.14
   3   2  -2    3.67    0.15
  -3  -2   2    3.87    0.15
  -3  -2   2    4.08    0.14
  -3  -2   2    4.01    0.15
   2   2  -2   41.22    1.51
  -2  -2   2   41.26    1.51
  -2  -2   2   39.86    1.50
   1   2  -2    4.81    0.18
   1   2  -2    4.61    0.18
  -1  -2   2    4.73    0.18
  -1  -2   2    4.53    0.18
   0   2  -2   11.95    0.44
   0   2  -2   11.78    0.44
   0  -2   2   11.23    0.44
   0  -2   2   11.87    0.44
  -1   2  -2   78.51    2.91
  -1   2  -2   81.05    2.94
  -1   2  -2   77.65    2.93
   1  -2   2   80.08    2.94
   1  -2   2   80.03    2.93
  -2   2  -2    4.14    0.16
  -2   2  -2    4.40    0.16
  -2   2  -2    4.52    0.17
   2  -2   2    4.09    0.16
  -3   2  -2    4.05    0.15
  -3   2  -2    3.79    0.15
  -3   2  -2    3.99    0.16
  -4   2  -2    9.02    0.32
  -4   2  -2    9.39    0.34
   4  -2   2    9.00    0.35
   4  -2   2    8.68    0.32
  -5   2  -2    2.12    0.09
  -5   2  -2    2.04    0.09
  -5   2  -2    1.92    0.10
   5  -2   2    2.06    0.09
  -6   2  -2    0.54    0.06
  -6   2  -2    0.49    0.05
  -6   2  -2    0.42    0.05
   6  -2   2    0.45    0.05
  -7   2  -2    0.03    0.03
  -7   2  -2    0.02    0.02
  -7   2  -2    0.03    0.03
  -7   2  -2    0.05    0.02
   7  -2   2    0.05    0.02
  -8   2  -2    5.32    0.17
  -8   2  -2    5.13    0.18
  -8   2  -2    5.36    0.18
   8  -2   2    5.58    0.17
   9   1  -2    0.90    0.04
  -9  -1   2    0.83    0.04
  -9  -1   2    0.87    0.04
  -8  -1   2    2.27    0.09
  -8  -1   2    2.21    0.10
  -8  -1   2    2.13    0.09
  -8  -1   2    2.24    0.09
   7   1  -2    1.53    0.08
  -7  -1   2    1.62    0.08
  -7  -1   2    1.44    0.07
  -7  -1   2    1.38    0.07
   6   1  -2    0.93    0.06
  -6  -1   2    1.05    0.08
  -6  -1   2    1.02    0.06
  -6  -1   2    1.03    0.07
   5   1  -2    0.34    0.04
  -5  -1   2    0.36    0.04
  -5  -1   2    0.34    0.04
   4   1  -2    4.76    0.17
  -4  -1   2    4.41    0.19
  -4  -1   2    4.88    0.18
  -4  -1   2    4.79    0.19
   3   1  -2   17.97    0.64
  -3  -1   2   16.20    0.59
  -3  -1   2   17.42    0.64
   2   1  -2   19.57    0.73
  -2  -1   2   19.65    0.73
  -2  -1   2   19.95    0.73
   1   1  -2   20.44    0.80
   1   1  -2   22.08    0.80
  -1  -1   2   22.05    0.81
  -1  -1   2   22.17    0.80
   0   1  -2    6.62    0.24
   0   1  -2    6.70    0.24
   0  -1   2    6.50    0.24
   0  -1   2    6.34    0.24
  -1   1  -2  155.58    5.54
  -1   1  -2  144.01    5.54
  -1   1  -2  154.06    5.51
   1  -1   2  151.58    5.55
   1  -1   2  147.30    5.54
  -2   1  -2   49.61    1.82
  -2   1  -2   48.72    1.82
  -2   1  -2   48.76    1.82
   2  -1   2   50.59    1.83
  -3   1  -2    4.08    0.16
  -3   1  -2    4.16    0.15
  -3   1  -2    4.05    0.16
   3  -1   2    3.80    0.15
  -4   1  -2    0.31    0.03
  -4   1  -2    0.37    0.03
   4  -1   2    0.34    0.04
   4  -1   2    0.34    0.04
  -5   1  -2    0.60    0.07
  -5   1  -2    0.60    0.05
  -5   1  -2    0.66    0.05
   5  -1   2    0.51    0.05
  -6   1  -2    0.70    0.05
  -6   1  -2    0.67    0.05
   6  -1   2    0.71    0.06
  -7   1  -2    0.26    0.03
  -7   1  -2    0.17    0.03
  -7   1  -2    0.22    0.03
  -7   1  -2    0.19    0.03
   7  -1   2    0.20    0.03
  -8   1  -2    0.72    0.04
  -8   1  -2    0.69    0.04
   8  -1   2    0.77    0.04
   9   0  -2    0.73    0.03
  -9   0   2    0.74    0.04
  -9   0   2    0.73    0.04
  -8   0   2    0.94    0.06
  -8   0   2    1.04    0.05
  -8   0   2    0.97    0.06
   7   0  -2   12.49    0.43
  -7   0   2   12.23    0.39
  -7   0   2   11.56    0.47
  -7   0   2   12.45    0.38
  -7   0   2   11.96    0.39
  -7   0   2   11.93    0.44
   6   0  -2    5.44    0.20
  -6   0   2    5.42    0.21
  -6   0   2    4.96    0.20
  -6   0   2    5.00    0.17
   5   0  -2    0.62    0.05
  -5   0   2    0.68    0.05
  -5   0   2    0.66    0.05
   4   0  -2    3.18    0.13
   4   0  -2    3.27    0.14
  -4   0   2    3.40    0.13
  -4   0   2    3.38    0.14
   3   0  -2   11.43    0.42
  -3   0   2   10.96    0.39
  -3   0   2   11.05    0.42
  -3   0   2   11.39    0.42
   1   0  -2   59.97    2.19
   1   0  -2   59.36    2.19
  -1   0   2   58.73    2.19
  -1   0   2   59.92    2.20
   0   0  -2   72.58    2.77
   0   0  -2   77.25    2.77
   0   0   2   77.42    2.77
   0   0   2   73.87    2.77
  -1   0  -2  221.23    9.07
  -1   0  -2  263.41    9.12
  -1   0  -2  256.34    9.12
   1   0   2  253.60    9.12
   1   0   2  245.58    9.12
  -2   0  -2   20.62    0.80
  -2   0  -2   22.54    0.80
  -2   0  -2   21.13    0.79
   2   0   2   22.06    0.80
  -3   0  -2    0.29    0.03
  -3   0  -2    0.43    0.04
  -4   0  -2   34.96    1.26
  -4   0  -2   34.78    1.18
   4   0   2   34.61    1.27
   4   0   2   33.05    1.17
  -5   0  -2   11.22    0.42
  -5   0  -2   11.26    0.35
  -5   0  -2   10.81    0.40
   5   0   2   11.36    0.39
  -6   0  -2    0.09    0.03
  -6   0  -2    0.07    0.03
  -6   0  -2    0.07    0.03
  -7   0  -2    3.42    0.14
  -7   0  -2    3.45    0.13
  -7   0  -2    3.51    0.12
  -7   0  -2    3.30    0.12
   7   0   2    3.41    0.12
  -8   0  -2   14.95    0.47
  -8   0  -2   15.00    0.46
  -8   0  -2   15.26    0.47
   8   0   2   15.49    0.44
   9  -1  -2    0.83    0.04
  -9   1   2    0.83    0.04
  -9   1   2    0.88    0.04
  -9   1   2    0.85    0.04
  -8   1   2    2.12    0.10
  -8   1   2    2.25    0.08
  -8   1   2    2.29    0.09
   7  -1  -2    1.50    0.08
  -7   1   2    1.51    0.07
  -7   1   2    1.42    0.09
  -7   1   2    1.53    0.08
  -7   1   2    1.51    0.07
  -7   1   2    1.41    0.07
   6  -1  -2    1.02    0.06
  -6   1   2    0.94    0.07
  -6   1   2    0.88    0.07
  -6   1   2    0.96    0.06
  -6   1   2    1.01    0.06
   5  -1  -2    0.35    0.04
  -5   1   2    0.37    0.04
  -5   1   2    0.34    0.04
   4  -1  -2    4.62    0.17
  -4   1   2    4.66    0.19
  -4   1   2    4.66    0.19
  -4   1   2    4.88    0.18
   3  -1  -2   18.31    0.67
  -3   1   2   18.06    0.67
  -3   1   2   18.51    0.67
  -3   1   2   18.75    0.67
  -3   1   2   16.86    0.62
   2  -1  -2   19.30    0.71
  -2   1   2   19.96    0.72
  -2   1   2   19.23    0.71
  -2   1   2   18.84    0.71
   1  -1  -2   21.91    0.82
   1  -1  -2   21.80    0.82
  -1   1   2   23.15    0.82
  -1   1   2   22.11    0.82
  -1   1   2   22.10    0.82
   0  -1  -2    6.53    0.25
   0  -1  -2    6.77    0.25
   0   1   2    6.29    0.24
   0   1   2    6.82    0.25
   0   1   2    6.84    0.25
  -1  -1  -2  151.66    5.38
  -1  -1  -2  143.69    5.38
   1   1   2  149.38    5.39
   1   1   2  139.78    5.38
   2   1   2   52.34    1.93
  -3  -1  -2    4.12    0.16
  -3  -1  -2    4.07    0.15
  -3  -1  -2    4.08    0.16
   3   1   2    3.90    0.15
  -4  -1  -2    0.31    0.03
  -5  -1  -2    0.57    0.05
  -5  -1  -2    0.61    0.05
  -5  -1  -2    0.62    0.05
   5   1   2    0.70    0.05
  -6  -1  -2    0.65    0.06
  -6  -1  -2    0.66    0.05
   6   1   2    0.70    0.05
  -7  -1  -2    0.21    0.03
  -7  -1  -2    0.30    0.04
  -7  -1  -2    0.24    0.03
   7   1   2    0.31    0.04
   7   1   2    0.23    0.03
  -8  -1  -2    0.73    0.04
  -8  -1  -2    0.77    0.04
   8   1   2    0.74    0.04
   9  -2  -2    0.10    0.01
  -9   2   2    0.09    0.01
  -9   2   2    0.11    0.02
  -9   2   2    0.10    0.01
  -8   2   2    2.92    0.10
  -8   2   2    2.92    0.12
  -8   2   2    3.00    0.11
   7  -2  -2    1.05    0.07
  -7   2   2    1.17    0.06
  -7   2   2    1.11    0.06
  -7   2   2    1.13    0.07
  -7   2   2    1.11    0.06
  -7   2   2    1.10    0.07
  -7   2   2    1.08    0.08
   6  -2  -2    6.35    0.23
  -6   2   2    6.15    0.20
  -6   2   2    6.45    0.25
  -6   2   2    6.16    0.24
  -6   2   2    6.42    0.22
   5  -2  -2    1.13    0.06
  -5   2   2    1.26    0.06
  -5   2   2    1.12    0.06
   4  -2  -2   14.77    0.50
  -4   2   2   14.40    0.54
  -4   2   2   14.27    0.54
  -4   2   2   14.33    0.50
   3  -2  -2    3.94    0.15
  -3   2   2    3.98    0.15
  -3   2   2    3.81    0.15
  -3   2   2    3.95    0.15
  -3   2   2    3.98    0.16
   2  -2  -2   40.19    1.46
  -2   2   2   38.21    1.45
  -2   2   2   41.03    1.46
  -2   2   2   39.14    1.46
   1  -2  -2    4.70    0.17
   1  -2  -2    4.63    0.17
  -1   2   2    4.74    0.17
  -1   2   2    4.58    0.18
   0  -2  -2   11.49    0.43
   0  -2  -2   11.37    0.42
   0   2   2   11.55    0.43
   0   2   2   11.47    0.43
   0   2   2   11.28    0.42
  -1  -2  -2   75.63    2.84
  -1  -2  -2   80.91    2.85
   1   2   2   74.87    2.84
   1   2   2   76.86    2.85
  -2  -2  -2    4.23    0.16
   2   2   2    4.11    0.16
  -3  -2  -2    3.77    0.15
  -3  -2  -2    3.86    0.15
  -3  -2  -2    4.04    0.16
   3   2   2    3.76    0.14
  -4  -2  -2    8.90    0.34
  -4  -2  -2    8.83    0.32
   4   2   2    9.11    0.31
  -5  -2  -2    2.14    0.10
  -5  -2  -2    2.15    0.10
  -5  -2  -2    2.09    0.10
   5   2   2    2.21    0.11
   5   2   2    2.21    0.09
  -6  -2  -2    0.55    0.05
   6   2   2    0.49    0.05
  -7  -2  -2    0.02    0.03
  -7  -2  -2    0.07    0.03
   7   2   2    0.08    0.02
   7   2   2    0.05    0.03
  -8  -2  -2    5.32    0.18
  -8  -2  -2    5.45    0.18
  -8  -2  -2    5.60    0.18
   8   2   2    5.60    0.17
   9  -3  -2    0.37    0.03
  -9   3   2    0.34    0.03
  -9   3   2    0.40    0.03
  -9   3   2    0.37    0.03
  -8   3   2    1.94    0.07
  -8   3   2    1.93    0.08
  -8   3   2    1.82    0.09
  -7   3   2    2.47    0.10
  -7   3   2    2.46    0.11
  -7   3   2    2.54    0.10
  -7   3   2    2.54    0.10
  -7   3   2    2.45    0.10
  -7   3   2    2.40    0.11
  -7   3   2    2.36    0.12
   6  -3  -2    0.58    0.05
  -6   3   2    0.47    0.05
  -6   3   2    0.58    0.06
  -6   3   2    0.50    0.04
  -6   3   2    0.57    0.05
  -6   3   2    0.51    0.05
  -6   3   2    0.64    0.05
   5  -3  -2    0.20    0.03
  -5   3   2    0.08    0.02
  -5   3   2    0.14    0.02
   4  -3  -2    2.25    0.10
  -4   3   2    2.28    0.10
  -4   3   2    2.27    0.09
   3  -3  -2   72.50    2.64
   3  -3  -2   74.75    2.65
  -3   3   2   71.59    2.65
  -3   3   2   68.39    2.66
  -3   3   2   71.63    2.63
   2  -3  -2   10.36    0.37
   2  -3  -2   10.07    0.37
  -2   3   2   10.01    0.37
  -2   3   2   10.07    0.37
  -2   3   2    9.67    0.37
  -1   3   2   60.31    2.19
  -1   3   2   58.49    2.19
  -1   3   2   60.22    2.19
   0  -3  -2    2.09    0.08
   0  -3  -2    1.99    0.08
   0   3   2    2.09    0.08
   0   3   2    1.98    0.08
   0   3   2    1.94    0.08
  -1  -3  -2   22.55    0.84
   1   3   2   22.77    0.84
   1   3   2   22.90    0.84
  -2  -3  -2   56.55    2.13
   2   3   2   58.14    2.12
  -3  -3  -2   19.17    0.66
  -3  -3  -2   19.23    0.72
   3   3   2   19.14    0.66
  -4  -3  -2    1.72    0.08
  -4  -3  -2    1.69    0.08
   4   3   2    1.81    0.07
   4   3   2    1.76    0.09
  -5  -3  -2    1.97    0.09
  -5  -3  -2    1.92    0.10
   5   3   2    1.93    0.08
  -6  -3  -2    0.55    0.05
   6   3   2    0.64    0.05
   6   3   2    0.54    0.05
   6   3   2    0.51    0.07
  -7  -3  -2   -0.03    0.02
  -7  -3  -2    0.00    0.02
   7   3   2    0.03    0.02
   7   3   2    0.02    0.03
  -8  -3  -2    4.66    0.16
  -8  -3  -2    4.67    0.15
  -8  -3  -2    4.67    0.15
   8   3   2    4.64    0.15
   9  -4  -2    0.02    0.01
  -9   4   2    0.00    0.01
  -9   4   2    0.02    0.02
  -9   4   2    0.01    0.01
  -8   4   2    3.06    0.13
  -8   4   2    3.19    0.11
  -8   4   2    3.11    0.11
  -7   4   2   20.82    0.82
  -7   4   2   21.35    0.68
  -7   4   2   22.03    0.65
  -7   4   2   22.35    0.76
  -7   4   2   20.90    0.62
  -7   4   2   23.07    0.68
   6  -4  -2   -0.02    0.03
  -6   4   2   -0.02    0.03
  -6   4   2   -0.02    0.03
  -6   4   2    0.00    0.02
  -6   4   2   -0.01    0.03
  -6   4   2    0.02    0.02
  -6   4   2    0.03    0.03
   5  -4  -2    0.66    0.05
  -5   4   2    0.71    0.05
  -5   4   2    0.72    0.05
  -5   4   2    0.65    0.06
   4  -4  -2    0.54    0.05
   4  -4  -2    0.50    0.04
  -4   4   2    0.49    0.03
  -4   4   2    0.55    0.04
   3  -4  -2   29.27    1.05
   3  -4  -2   27.61    1.05
  -3   4   2   27.93    1.05
  -3   4   2   28.27    1.05
  -3   4   2   28.85    1.05
   2  -4  -2    0.01    0.00
   2  -4  -2    0.01    0.00
  -2   4   2    0.01    0.01
  -2   4   2    0.01    0.00
  -1   4   2   10.02    0.37
   0  -4  -2   18.94    0.68
   0  -4  -2   18.33    0.68
   0   4   2   18.49    0.68
   0   4   2   18.25    0.68
   0   4   2   17.78    0.67
  -1  -4  -2    0.24    0.02
   1   4   2    0.30    0.02
   1   4   2    0.24    0.02
  -2  -4  -2    4.64    0.18
  -3  -4  -2   32.26    1.12
   3   4   2   32.92    1.11
  -4  -4  -2   31.55    1.13
  -4  -4  -2   29.53    1.05
   4   4   2   31.41    1.04
   4   4   2   29.53    1.14
  -5  -4  -2    0.36    0.05
  -5  -4  -2    0.36    0.05
   5   4   2    0.36    0.05
   5   4   2    0.39    0.06
   5   4   2    0.40    0.04
  -6  -4  -2    0.43    0.05
   6   4   2    0.56    0.05
   6   4   2    0.44    0.04
  -7  -4  -2    0.43    0.05
  -7  -4  -2    0.45    0.05
   7   4   2    0.39    0.04
  -8  -4  -2    0.22    0.03
  -8  -4  -2    0.26    0.03
  -8  -4  -2    0.21    0.03
   8   4   2    0.23    0.03
   9  -5  -2    1.78    0.06
  -9   5   2    1.57    0.06
  -9   5   2    1.78    0.06
  -9   5   2    1.80    0.06
  -8   5   2    0.26    0.03
  -8   5   2    0.32    0.03
  -7   5   2    2.88    0.10
  -7   5   2    2.92    0.11
  -7   5   2    2.82    0.11
  -7   5   2    2.83    0.11
  -7   5   2    2.72    0.14
  -7   5   2    3.11    0.12
   6  -5  -2    0.62    0.06
  -6   5   2    0.69    0.05
  -6   5   2    0.61    0.05
  -6   5   2    0.71    0.05
  -5   5   2    0.84    0.06
  -5   5   2    1.01    0.05
  -5   5   2    0.84    0.06
  -5   5   2    1.05    0.05
  -5   5   2    0.88    0.06
   4  -5  -2    5.77    0.22
  -4   5   2    6.28    0.23
   3  -5  -2   25.38    0.90
   3  -5  -2   23.66    0.90
  -3   5   2   24.58    0.90
  -3   5   2   24.67    0.90
  -3   5   2   23.87    0.90
  -2   5   2    4.96    0.18
  -2   5   2    4.72    0.18
  -2   5   2    4.78    0.18
  -1   5   2    2.62    0.10
   0  -5  -2   11.91    0.46
   0  -5  -2   12.87    0.46
   0   5   2   12.36    0.46
   0   5   2   12.10    0.46
   0   5   2   12.74    0.46
  -1  -5  -2   32.87    1.22
   1   5   2   32.65    1.22
   1   5   2   33.55    1.22
  -2  -5  -2   57.16    2.14
   2   5   2   60.41    2.14
   2   5   2   56.50    1.96
  -3  -5  -2    1.82    0.08
   3   5   2    1.79    0.07
  -4  -5  -2    0.06    0.02
   4   5   2    0.08    0.02
   4   5   2    0.12    0.03
  -5  -5  -2    5.65    0.22
  -5  -5  -2    5.56    0.21
   5   5   2    5.32    0.20
   5   5   2    5.14    0.24
  -6  -5  -2    0.31    0.04
  -6  -5  -2    0.46    0.05
   6   5   2    0.31    0.04
   6   5   2    0.32    0.04
  -7  -5  -2    0.08    0.03
  -7  -5  -2    0.12    0.03
   7   5   2    0.08    0.02
  -8  -5  -2    2.04    0.07
  -8  -5  -2    1.98    0.08
  -8  -5  -2    2.01    0.07
   8   5   2    1.95    0.07
   8   5   2    1.75    0.10
   9  -6  -2    2.51    0.08
  -9   6   2    2.50    0.08
  -9   6   2    2.46    0.08
  -8   6   2    1.33    0.06
  -8   6   2    1.49    0.06
  -8   6   2    1.37    0.06
  -7   6   2    8.38    0.27
  -7   6   2    7.68    0.32
  -7   6   2    8.44    0.27
  -7   6   2    7.95    0.30
  -7   6   2    8.47    0.26
  -6   6   2    1.26    0.06
  -6   6   2    1.18    0.07
  -6   6   2    1.31    0.07
  -6   6   2    1.37    0.07
  -5   6   2    1.21    0.07
  -5   6   2    1.09    0.06
  -5   6   2    1.08    0.06
   4  -6  -2    0.60    0.05
  -4   6   2    0.68    0.04
  -4   6   2    0.66    0.04
  -4   6   2    0.73    0.04
   3  -6  -2    0.30    0.02
   3  -6  -2    0.29    0.02
  -3   6   2    0.29    0.03
  -3   6   2    0.27    0.02
  -2   6   2    0.65    0.03
  -2   6   2    0.61    0.03
  -2   6   2    0.67    0.03
  -1   6   2   31.46    1.12
  -1   6   2   29.48    1.11
  -1   6   2   30.19    1.12
   0  -6  -2    5.30    0.20
   0   6   2    5.37    0.20
   0   6   2    5.48    0.20
   0   6   2    5.13    0.20
  -1  -6  -2   20.70    0.75
   1   6   2   19.92    0.75
   1   6   2   20.51    0.75
  -2  -6  -2   14.95    0.54
   2   6   2   13.77    0.54
  -3  -6  -2   12.80    0.46
   3   6   2   13.31    0.45
  -4  -6  -2    0.06    0.02
   4   6   2    0.02    0.02
  -5  -6  -2    5.11    0.19
  -5  -6  -2    5.01    0.21
   5   6   2    4.93    0.18
   5   6   2    4.81    0.16
  -6  -6  -2    0.64    0.06
  -6  -6  -2    0.59    0.06
   6   6   2    0.68    0.05
   6   6   2    0.63    0.05
  -7  -6  -2    3.25    0.12
  -7  -6  -2    3.30    0.14
   7   6   2    3.22    0.11
  -8  -6  -2    3.42    0.11
  -8  -6  -2    3.26    0.12
  -8  -6  -2    3.30    0.11
  -8  -6  -2    3.15    0.14
   8   6   2    3.40    0.11
   9  -7  -2    2.45    0.08
  -9   7   2    2.52    0.08
  -8   7   2    0.47    0.04
  -8   7   2    0.52    0.04
  -7   7   2    0.69    0.04
  -7   7   2    0.52    0.04
  -7   7   2    0.52    0.05
  -6   7   2    2.35    0.11
  -6   7   2    2.15    0.10
   5  -7  -2    0.97    0.07
  -5   7   2    1.07    0.07
  -5   7   2    0.98    0.05
  -5   7   2    1.03    0.07
  -5   7   2    1.05    0.06
  -4   7   2   20.11    0.73
  -4   7   2   19.21    0.68
  -4   7   2   19.39    0.72
  -3   7   2    0.01    0.01
  -3   7   2    0.02    0.01
  -2   7   2    0.17    0.02
  -2   7   2    0.17    0.01
  -2   7   2    0.21    0.01
  -2   7   2    0.17    0.02
  -1   7   2   26.88    0.99
  -1   7   2   26.24    0.99
  -1   7   2   27.52    0.99
   0  -7  -2    4.26    0.16
   0   7   2    4.08    0.16
   0   7   2    4.05    0.16
   0   7   2    4.17    0.16
  -1  -7  -2   37.54    1.35
   1   7   2   35.99    1.35
   1   7   2   36.21    1.35
  -2  -7  -2   20.21    0.72
   2   7   2   18.37    0.72
  -3  -7  -2    6.28    0.23
   3   7   2    6.47    0.23
  -4  -7  -2    2.36    0.10
   4   7   2    2.34    0.09
  -5  -7  -2    0.24    0.04
  -5  -7  -2    0.22    0.04
   5   7   2    0.23    0.03
   5   7   2    0.19    0.04
  -6  -7  -2    0.28    0.04
  -6  -7  -2    0.38    0.05
   6   7   2    0.29    0.04
   6   7   2    0.28    0.03
  -7  -7  -2   11.19    0.40
  -7  -7  -2   11.20    0.35
   7   7   2   10.91    0.33
  -8  -7  -2    0.95    0.05
   8   7   2    1.09    0.04
   8   7   2    0.83    0.07
  -8   8   2    2.10    0.08
  -8   8   2    2.09    0.08
  -7   8   2    0.08    0.05
  -7   8   2    0.01    0.02
  -7   8   2    0.04    0.02
  -7   8   2    0.02    0.02
  -7   8   2    0.01    0.03
  -6   8   2    0.34    0.05
  -6   8   2    0.27    0.04
   5  -8  -2   10.82    0.40
  -5   8   2   11.58    0.34
  -5   8   2   11.17    0.40
  -5   8   2   11.39    0.43
  -4   8   2    6.05    0.23
  -4   8   2    6.16    0.22
  -3   8   2    0.17    0.02
  -3   8   2    0.13    0.02
  -3   8   2    0.13    0.02
  -2   8   2   13.49    0.49
  -2   8   2   12.99    0.49
  -1   8   2    5.11    0.19
  -1   8   2    4.92    0.19
  -1   8   2    5.07    0.19
   0   8   2    2.44    0.10
  -1  -8  -2   10.91    0.37
   1   8   2    8.73    0.37
   2   8   2    3.75    0.15
  -3  -8  -2    2.29    0.10
   3   8   2    2.46    0.09
  -4  -8  -2    0.37    0.04
   4   8   2    0.25    0.03
  -5  -8  -2    1.63    0.10
  -5  -8  -2    1.56    0.08
   5   8   2    1.59    0.07
   5   8   2    1.59    0.07
  -6  -8  -2   -0.01    0.03
  -6  -8  -2    0.04    0.03
  -6  -8  -2    0.01    0.03
   6   8   2    0.02    0.03
   6   8   2    0.01    0.02
  -7  -8  -2    6.61    0.21
  -7  -8  -2    6.53    0.25
  -7  -8  -2    6.66    0.22
   7   8   2    6.51    0.20
  -8  -8  -2    5.14    0.17
  -8  -8  -2    5.37    0.17
   8   8   2    5.18    0.16
   8  -9  -2    1.79    0.07
  -8   9   2    1.96    0.07
  -8   9   2    1.98    0.07
  -8   9   2    1.90    0.07
  -7   9   2    0.99    0.10
  -7   9   2    1.19    0.06
  -7   9   2    1.27    0.07
  -7   9   2    1.24    0.06
  -7   9   2    1.27    0.06
  -6   9   2    6.46    0.26
  -6   9   2    6.26    0.20
  -6   9   2    6.65    0.24
  -6   9   2    6.35    0.21
  -6   9   2    6.48    0.22
  -5   9   2    7.56    0.28
  -5   9   2    7.39    0.23
  -5   9   2    7.04    0.22
  -5   9   2    7.12    0.26
  -4   9   2   14.06    0.53
  -4   9   2   14.29    0.54
  -4   9   2   14.48    0.50
  -3   9   2    7.48    0.28
  -3   9   2    7.29    0.26
  -2   9   2    3.86    0.15
  -2   9   2    3.69    0.14
  -1   9   2    7.68    0.29
  -1   9   2    8.09    0.29
  -1   9   2    7.77    0.29
   0  -9  -2    0.16    0.01
   0  -9  -2    0.15    0.02
   0   9   2    0.15    0.02
   0   9   2    0.15    0.01
   0   9   2    0.19    0.02
   0   9   2    0.17    0.02
  -1  -9  -2    1.35    0.06
   1   9   2    1.35    0.06
   1   9   2    1.41    0.06
   1   9   2    1.21    0.06
  -2  -9  -2   38.54    1.28
  -2  -9  -2   38.19    1.39
   2   9   2   36.01    1.39
   2   9   2   37.55    1.28
  -3  -9  -2   24.48    0.82
   3   9   2   23.15    0.81
  -4  -9  -2    4.14    0.16
   4   9   2    4.12    0.15
  -5  -9  -2   11.15    0.43
  -5  -9  -2   10.91    0.40
   5   9   2   11.12    0.39
   5   9   2   10.69    0.33
  -6  -9  -2    0.73    0.06
  -6  -9  -2    0.70    0.06
  -6  -9  -2    0.65    0.06
   6   9   2    0.70    0.06
   6   9   2    0.63    0.05
   6   9   2    0.70    0.05
  -7  -9  -2    4.78    0.16
  -7  -9  -2    4.65    0.19
  -7  -9  -2    4.81    0.16
   7   9   2    4.74    0.18
   7   9   2    4.64    0.15
  -8  -9  -2    1.88    0.07
  -8  -9  -2    1.70    0.07
   8   9   2    1.89    0.06
   8 -10  -2    3.69    0.12
  -8  10   2    3.72    0.13
  -8  10   2    3.75    0.12
  -7  10   2    0.42    0.04
  -7  10   2    0.46    0.04
  -7  10   2    0.46    0.07
  -7  10   2    0.46    0.04
  -6  10   2    0.06    0.02
  -6  10   2    0.06    0.02
  -6  10   2    0.07    0.02
  -6  10   2    0.07    0.03
  -6  10   2    0.08    0.03
  -5  10   2    0.01    0.02
  -5  10   2    0.04    0.03
  -5  10   2    0.01    0.02
  -5  10   2   -0.02    0.06
  -5  10   2   -0.02    0.03
  -4  10   2   14.25    0.56
  -4  10   2   16.08    0.56
  -4  10   2   14.71    0.52
  -3  10   2    4.50    0.16
  -3  10   2    4.19    0.17
  -2  10   2    2.46    0.10
  -2  10   2    2.51    0.10
  -1  10   2    0.42    0.02
  -1  10   2    0.45    0.02
  -1  10   2    0.43    0.03
   0 -10  -2   57.11    2.13
   0 -10  -2   60.88    2.13
   0  10   2   57.06    2.13
   0  10   2   58.37    1.89
   0  10   2   57.65    2.13
   0  10   2   56.07    2.12
  -1 -10  -2   13.94    0.50
  -1 -10  -2   15.37    0.54
   1  10   2   14.70    0.50
   1  10   2   14.04    0.54
  -2 -10  -2   27.50    0.90
   2  10   2   24.86    0.98
   2  10   2   26.33    0.90
  -3 -10  -2   21.05    0.78
  -3 -10  -2   19.38    0.71
   3  10   2   21.40    0.71
  -4 -10  -2    2.11    0.10
   4  10   2    2.06    0.09
  -5 -10  -2    0.43    0.06
   5  10   2    0.29    0.04
   5  10   2    0.32    0.04
  -6 -10  -2    0.13    0.03
  -6 -10  -2    0.03    0.03
  -6 -10  -2    0.04    0.03
   6  10   2    0.05    0.02
   6  10   2    0.02    0.03
  -7 -10  -2    8.32    0.27
  -7 -10  -2    8.36    0.27
   7  10   2    8.74    0.26
  -8 -10  -2    0.37    0.03
  -8 -10  -2    0.37    0.03
   8  10   2    0.42    0.03
   8 -11  -2    0.38    0.03
  -8  11   2    0.34    0.03
  -8  11   2    0.33    0.03
  -8  11   2    0.31    0.03
  -7  11   2    3.28    0.12
  -7  11   2    3.29    0.11
  -7  11   2    2.87    0.16
  -7  11   2    3.26    0.12
  -7  11   2    3.30    0.11
  -6  11   2    0.03    0.02
  -6  11   2    0.07    0.03
  -6  11   2    0.00    0.02
  -6  11   2    0.07    0.02
  -6  11   2    0.05    0.03
  -5  11   2    0.84    0.06
  -5  11   2    0.72    0.08
  -5  11   2    0.86    0.05
  -5  11   2    0.84    0.05
  -5  11   2    0.89    0.05
  -5  11   2    0.87    0.06
  -4  11   2   15.17    0.57
  -4  11   2   15.38    0.52
  -4  11   2   14.68    0.44
  -3  11   2    1.20    0.06
  -3  11   2    1.19    0.06
  -2  11   2   19.15    0.71
  -1  11   2   11.57    0.38
  -1  11   2   11.09    0.42
   0 -11  -2    5.91    0.22
   0 -11  -2    5.85    0.22
   0  11   2    5.47    0.21
   0  11   2    6.18    0.22
   0  11   2    5.97    0.22
   0  11   2    5.98    0.20
  -1 -11  -2   41.44    1.39
  -1 -11  -2   41.66    1.50
   1  11   2   40.02    1.50
   1  11   2   39.38    1.38
  -2 -11  -2   10.80    0.38
   2  11   2   10.97    0.38
   2  11   2   10.95    0.42
  -3 -11  -2    2.90    0.12
  -3 -11  -2    2.90    0.13
   3  11   2    2.73    0.11
  -4 -11  -2    0.82    0.07
  -4 -11  -2    0.79    0.06
   4  11   2    0.77    0.05
  -5 -11  -2    0.38    0.05
  -5 -11  -2    0.41    0.05
   5  11   2    0.32    0.04
   5  11   2    0.46    0.04
  -6 -11  -2    0.30    0.04
  -6 -11  -2    0.37    0.05
  -6 -11  -2    0.24    0.03
   6  11   2    0.37    0.04
   6  11   2    0.25    0.04
   6  11   2    0.24    0.03
  -7 -11  -2    0.94    0.06
  -7 -11  -2    0.93    0.05
  -7 -11  -2    0.98    0.07
  -8 -11  -2    2.40    0.08
  -8 -11  -2    2.37    0.08
   8 -12  -2    1.36    0.06
  -8  12   2    1.43    0.06
  -8  12   2    1.49    0.06
  -8  12   2    1.40    0.05
  -7  12   2    0.78    0.04
  -7  12   2    0.78    0.04
  -7  12   2    0.76    0.05
  -7  12   2    0.78    0.05
  -6  12   2    0.62    0.05
  -6  12   2    0.62    0.06
  -6  12   2    0.64    0.05
  -6  12   2    0.67    0.04
  -5  12   2    0.65    0.06
  -5  12   2    0.66    0.05
  -5  12   2    0.75    0.07
  -5  12   2    0.68    0.05
  -4  12   2   11.18    0.34
  -4  12   2   11.81    0.44
  -3  12   2   19.77    0.68
  -3  12   2   20.91    0.76
  -2  12   2   10.79    0.37
  -2  12   2   11.07    0.41
  -1  12   2    0.87    0.05
  -1  12   2    0.98    0.05
   0 -12  -2    0.84    0.04
   0 -12  -2    0.85    0.04
   0  12   2    0.85    0.05
   0  12   2    0.94    0.05
   0  12   2    0.89    0.04
   0  12   2    0.84    0.05
  -1 -12  -2   76.83    2.86
  -1 -12  -2   77.53    2.63
   1  12   2   73.82    2.63
   1  12   2   80.84    2.54
   1  12   2   78.88    2.86
  -2 -12  -2   15.78    0.54
   2  12   2   15.00    0.53
  -3 -12  -2    0.07    0.02
  -3 -12  -2    0.05    0.03
  -4 -12  -2   10.15    0.37
   4  12   2    9.97    0.36
  -5 -12  -2    4.99    0.17
  -5 -12  -2    5.02    0.19
   5  12   2    4.80    0.18
   5  12   2    3.97    0.17
   5  12   2    4.93    0.16
  -6 -12  -2    6.16    0.24
  -6 -12  -2    6.33    0.21
  -6 -12  -2    6.15    0.21
   6  12   2    6.30    0.23
   6  12   2    6.18    0.21
  -7 -12  -2    3.67    0.13
  -7 -12  -2    3.59    0.12
  -8 -12  -2    0.05    0.01
  -8 -12  -2    0.02    0.01
  -8  13   2    4.70    0.15
  -8  13   2    4.63    0.14
  -8  13   2    4.48    0.15
  -7  13   2    2.60    0.09
  -7  13   2    2.72    0.10
  -7  13   2    2.64    0.10
  -7  13   2    2.57    0.09
  -6  13   2    1.07    0.05
  -6  13   2    1.04    0.07
  -6  13   2    1.09    0.08
  -6  13   2    1.08    0.06
  -6  13   2    1.06    0.05
  -6  13   2    1.10    0.06
  -5  13   2    0.85    0.06
  -5  13   2    0.82    0.07
  -5  13   2    0.84    0.05
  -4  13   2    5.49    0.20
  -4  13   2    5.51    0.18
  -4  13   2    5.84    0.22
  -3  13   2    4.30    0.17
  -2  13   2    1.13    0.05
  -1  13   2  116.38    3.99
  -1  13   2  117.14    3.85
  -1  13   2  120.62    4.35
   0 -13  -2    7.56    0.29
   0  13   2    7.42    0.27
   0  13   2    7.51    0.29
   0  13   2    7.84    0.26
  -1 -13  -2    6.69    0.24
   1  13   2    6.90    0.24
   1  13   2    6.94    0.24
   1  13   2    6.55    0.27
  -2 -13  -2   36.93    1.33
  -2 -13  -2   39.95    1.44
   2  13   2   39.69    1.32
  -3 -13  -2    0.81    0.05
  -3 -13  -2    0.80    0.08
   3  13   2    0.84    0.05
  -4 -13  -2    1.10    0.07
   4  13   2    1.07    0.06
  -5 -13  -2    0.45    0.05
   5  13   2    0.43    0.04
   5  13   2    0.37    0.04
  -6 -13  -2    7.13    0.27
  -6 -13  -2    7.04    0.23
   6  13   2    7.04    0.23
   6  13   2    6.93    0.22
   6  13   2    6.87    0.26
  -7 -13  -2    0.09    0.02
  -7 -13  -2    0.14    0.02
  -8 -13  -2    0.05    0.01
  -8  14   2    1.90    0.07
  -8  14   2    1.93    0.07
  -8  14   2    1.82    0.07
  -7  14   2    0.34    0.03
  -7  14   2    0.32    0.04
  -6  14   2    0.32    0.04
  -6  14   2    0.29    0.04
  -6  14   2    0.35    0.04
  -6  14   2    0.31    0.03
  -6  14   2    0.29    0.04
  -6  14   2    0.35    0.05
  -5  14   2    3.18    0.14
  -5  14   2    3.16    0.13
  -5  14   2    3.28    0.11
  -4  14   2    2.83    0.12
  -4  14   2    3.01    0.15
  -4  14   2    2.87    0.12
  -4  14   2    2.84    0.12
  -3  14   2    9.84    0.37
  -2  14   2    0.31    0.04
  -2  14   2    0.27    0.03
  -1  14   2    0.00    0.01
  -1  14   2    0.03    0.03
   0  14   2    3.10    0.13
   0  14   2    3.55    0.13
  -1 -14  -2   15.62    0.54
   1  14   2   15.68    0.53
  -2 -14  -2   28.91    1.10
  -2 -14  -2   30.09    1.01
   2  14   2   29.41    1.01
  -3 -14  -2    1.68    0.08
  -3 -14  -2    1.78    0.12
   3  14   2    1.87    0.08
  -4 -14  -2    0.78    0.06
   4  14   2    0.79    0.05
  -5 -14  -2    1.63    0.09
  -5 -14  -2    1.66    0.09
   5  14   2    1.70    0.08
   5  14   2    1.80    0.08
  -6 -14  -2    1.44    0.09
  -6 -14  -2    1.62    0.07
   6  14   2    1.43    0.07
   6  14   2    1.43    0.07
  -7 -14  -2    9.59    0.30
  -7 -14  -2   10.24    0.30
   7  14   2    9.30    0.29
  -8  15   2    1.58    0.06
  -8  15   2    1.62    0.06
  -8  15   2    1.54    0.06
  -7  15   2    0.89    0.04
  -6  15   2    0.05    0.02
  -6  15   2    0.11    0.02
  -6  15   2    0.07    0.04
  -6  15   2   -0.01    0.04
  -6  15   2    0.06    0.02
  -5  15   2    1.89    0.08
  -5  15   2    1.80    0.09
  -5  15   2    1.79    0.08
  -5  15   2    1.86    0.08
  -5  15   2    1.85    0.08
  -5  15   2    1.93    0.09
  -4  15   2    5.25    0.17
  -4  15   2    5.42    0.19
  -4  15   2    5.26    0.18
  -4  15   2    5.40    0.21
  -4  15   2    5.10    0.20
  -3  15   2    5.93    0.21
  -3  15   2    5.84    0.19
  -3  15   2    6.42    0.24
  -2  15   2    4.13    0.17
  -1  15   2    0.46    0.04
  -1  15   2    0.37    0.03
  -1  15   2    0.36    0.03
   0  15   2   16.08    0.60
  -1 -15  -2   14.64    0.50
   1  15   2   15.64    0.49
   1  15   2   13.01    0.50
  -2 -15  -2    0.01    0.02
   2  15   2    0.03    0.02
  -3 -15  -2    7.80    0.26
   3  15   2    8.15    0.29
  -4 -15  -2    2.35    0.10
  -4 -15  -2    2.26    0.11
  -4 -15  -2    2.36    0.10
   4  15   2    2.36    0.10
  -5 -15  -2    0.17    0.04
  -5 -15  -2    0.21    0.03
  -5 -15  -2    0.21    0.04
   5  15   2    0.35    0.05
   5  15   2    0.25    0.04
  -6 -15  -2    4.56    0.15
  -6 -15  -2    4.06    0.17
  -6 -15  -2    4.26    0.15
   6  15   2    3.99    0.15
  -7 -15  -2    8.59    0.27
   7 -16  -2    0.91    0.05
  -7  16   2    0.96    0.04
  -7  16   2    0.91    0.05
  -6  16   2    1.31    0.06
  -6  16   2    1.36    0.07
  -6  16   2    1.29    0.09
  -6  16   2    1.28    0.06
  -6  16   2    1.25    0.06
  -5  16   2    0.49    0.04
  -5  16   2    0.48    0.04
  -5  16   2    0.46    0.04
  -5  16   2    0.39    0.05
  -5  16   2    0.31    0.05
  -4  16   2    0.45    0.04
  -4  16   2    0.63    0.07
  -4  16   2    0.51    0.04
  -4  16   2    0.56    0.06
  -4  16   2    0.48    0.04
  -4  16   2    0.59    0.08
  -3  16   2    0.60    0.04
  -3  16   2    0.58    0.05
  -3  16   2    0.52    0.06
  -3  16   2    0.52    0.07
  -2  16   2   15.95    0.60
  -1  16   2    3.77    0.15
  -1  16   2    3.67    0.15
  -1  16   2    3.72    0.14
   0  16   2    0.42    0.05
   0  16   2    0.48    0.04
  -1 -16  -2    0.04    0.02
   1  16   2    0.07    0.02
  -2 -16  -2    9.89    0.35
   2  16   2    9.43    0.34
  -3 -16  -2    0.06    0.05
  -3 -16  -2    0.10    0.03
   3  16   2    0.06    0.02
  -4 -16  -2    0.04    0.03
  -4 -16  -2    0.01    0.03
   4  16   2    0.05    0.02
  -5 -16  -2    1.19    0.08
  -5 -16  -2    1.14    0.07
   5  16   2    1.17    0.07
   5  16   2    1.31    0.07
  -6 -16  -2    1.65    0.08
  -6 -16  -2    1.43    0.09
   6  16   2    1.90    0.08
   6  16   2    1.69    0.07
  -7 -16  -2    0.01    0.02
   7  16   2    0.05    0.02
  -7  17   2    0.03    0.01
  -7  17   2    0.02    0.02
  -7  17   2    0.01    0.01
   6 -17  -2    4.46    0.16
  -6  17   2    3.84    0.19
  -6  17   2    4.53    0.14
  -6  17   2    4.30    0.15
  -6  17   2    4.48    0.15
  -6  17   2    4.34    0.16
  -6  17   2    4.49    0.14
  -5  17   2   13.41    0.41
  -5  17   2   13.21    0.39
  -5  17   2   12.74    0.42
  -5  17   2   12.87    0.50
  -5  17   2   12.81    0.41
  -5  17   2   12.79    0.38
  -4  17   2    0.18    0.04
  -4  17   2    0.26    0.05
  -4  17   2    0.17    0.03
  -3  17   2    1.60    0.08
  -3  17   2    1.68    0.08
  -3  17   2    1.58    0.09
  -3  17   2    1.70    0.07
  -3  17   2    1.69    0.08
  -3  17   2    1.65    0.08
  -2  17   2    3.52    0.15
  -2  17   2    3.55    0.13
  -1  17   2   10.61    0.36
  -1  17   2   10.05    0.39
  -1  17   2   10.70    0.40
   0  17   2    3.05    0.12
   0  17   2    2.95    0.12
  -1 -17  -2    1.52    0.07
   1  17   2    1.46    0.07
   1  17   2    1.50    0.09
   2  17   2    4.51    0.17
   2  17   2    4.88    0.18
   2  17   2    4.63    0.17
  -3 -17  -2    7.58    0.29
  -3 -17  -2    7.70    0.25
   3  17   2    7.84    0.28
   3  17   2    7.76    0.27
  -4 -17  -2   16.50    0.58
   4  17   2   15.58    0.56
   4  17   2   16.38    0.51
  -5 -17  -2    0.53    0.06
  -5 -17  -2    0.42    0.06
   5  17   2    0.57    0.05
   5  17   2    0.56    0.05
  -6 -17  -2    9.18    0.29
  -6 -17  -2    8.87    0.34
   6  17   2    9.04    0.33
   6  17   2    9.12    0.29
  -7 -17  -2    8.87    0.27
  -7 -17  -2    8.37    0.27
   7  17   2    8.76    0.27
  -7  18   2    0.31    0.03
  -7  18   2    0.37    0.03
   6 -18  -2    0.02    0.02
  -6  18   2    0.02    0.02
  -6  18   2    0.03    0.02
  -6  18   2    0.01    0.02
  -5  18   2    5.76    0.20
  -5  18   2    5.83    0.19
  -5  18   2    5.42    0.23
  -5  18   2    5.77    0.18
  -5  18   2    5.92    0.18
  -5  18   2    5.59    0.19
  -4  18   2    0.07    0.03
  -4  18   2    0.03    0.02
  -4  18   2    0.03    0.04
  -4  18   2    0.03    0.03
  -4  18   2    0.07    0.03
  -3  18   2    0.01    0.03
  -3  18   2    0.03    0.02
  -3  18   2    0.02    0.02
  -3  18   2    0.01    0.03
  -3  18   2   -0.01    0.04
  -3  18   2    0.06    0.03
   2 -18  -2    0.05    0.03
  -2  18   2    0.04    0.03
  -2  18   2    0.02    0.04
  -2  18   2    0.03    0.02
  -2  18   2    0.12    0.05
  -1  18   2    0.21    0.03
  -1  18   2    0.19    0.05
  -1  18   2    0.22    0.04
   0  18   2    0.07    0.02
   0  18   2    0.11    0.04
   0  18   2    0.04    0.03
   0  18   2    0.10    0.04
  -1 -18  -2    0.03    0.02
   1  18   2    0.02    0.03
   1  18   2   -0.02    0.05
  -2 -18  -2    3.08    0.13
   2  18   2    3.09    0.12
   2  18   2    2.87    0.13
  -3 -18  -2    0.76    0.06
  -3 -18  -2    0.67    0.06
   3  18   2    0.83    0.09
   3  18   2    0.66    0.07
   3  18   2    0.76    0.05
  -4 -18  -2    2.35    0.10
  -4 -18  -2    2.27    0.10
  -4 -18  -2    2.44    0.12
   4  18   2    2.44    0.10
   4  18   2    2.52    0.10
  -5 -18  -2    0.07    0.03
   5  18   2    0.13    0.03
   5  18   2    0.15    0.03
  -6 -18  -2    0.01    0.02
   6  18   2    0.01    0.02
  -7 -18  -2    6.50    0.20
   7  18   2    6.27    0.20
  -7  19   2   22.83    0.70
  -7  19   2   22.35    0.69
   6 -19  -2   15.54    0.51
  -6  19   2   15.68    0.48
  -6  19   2   15.20    0.44
   5 -19  -2    2.39    0.10
  -5  19   2    2.28    0.09
  -5  19   2    2.25    0.09
  -5  19   2    2.44    0.10
  -5  19   2    2.26    0.12
   4 -19  -2    1.97    0.09
  -4  19   2    2.01    0.09
  -4  19   2    1.95    0.08
  -4  19   2    1.69    0.10
  -4  19   2    1.92    0.10
  -4  19   2    2.07    0.08
  -4  19   2    1.88    0.08
   3 -19  -2    0.38    0.04
  -3  19   2    0.35    0.05
  -3  19   2    0.35    0.04
  -3  19   2    0.38    0.04
  -3  19   2    0.32    0.05
  -3  19   2    0.36    0.04
  -3  19   2    0.36    0.07
  -2  19   2    2.60    0.10
  -2  19   2    2.61    0.11
  -2  19   2    2.70    0.12
  -1  19   2    3.41    0.13
  -1  19   2    3.59    0.14
  -1  19   2    3.07    0.15
   0  19   2    1.09    0.08
   0  19   2    1.22    0.07
   0  19   2    1.15    0.08
   0  19   2    1.07    0.06
  -1 -19  -2    3.88    0.15
   1  19   2    3.80    0.15
   1  19   2    3.61    0.15
  -2 -19  -2    0.23    0.03
   2  19   2    0.28    0.06
   2  19   2    0.20    0.05
   2  19   2    0.27    0.04
  -3 -19  -2    0.06    0.03
   3  19   2    0.02    0.03
  -4 -19  -2   27.92    0.96
  -4 -19  -2   27.28    0.83
   4  19   2   28.03    0.85
   4  19   2   26.94    0.95
  -5 -19  -2   28.11    0.98
   5  19   2   28.10    0.86
  -6 -19  -2    0.89    0.05
   6  19   2    0.83    0.05
  -7  20   2    0.02    0.01
  -7  20   2    0.04    0.01
   6 -20  -2    0.03    0.02
  -6  20   2   -0.01    0.01
  -6  20   2   -0.01    0.02
  -5  20   2    0.43    0.04
  -5  20   2    0.42    0.04
  -5  20   2    0.51    0.06
  -5  20   2    0.38    0.05
   4 -20  -2    7.19    0.25
  -4  20   2    7.26    0.25
  -4  20   2    7.33    0.24
  -4  20   2    7.28    0.23
  -4  20   2    6.63    0.28
  -4  20   2    7.12    0.24
  -4  20   2    7.29    0.22
   3 -20  -2    0.01    0.03
  -3  20   2   -0.04    0.06
  -3  20   2    0.04    0.04
  -3  20   2    0.05    0.02
  -3  20   2    0.03    0.03
  -3  20   2    0.03    0.03
  -3  20   2    0.01    0.02
  -2  20   2   26.84    0.88
  -2  20   2   28.79    0.87
  -2  20   2   27.57    0.88
  -2  20   2   27.89    0.86
  -2  20   2   28.20    0.93
  -1  20   2    0.99    0.06
  -1  20   2    1.01    0.07
  -1  20   2    1.03    0.10
  -1  20   2    1.29    0.07
   0  20   2    2.29    0.10
   0  20   2    2.28    0.11
  -1 -20  -2    0.38    0.04
   1  20   2    0.42    0.05
   1  20   2    0.46    0.05
  -2 -20  -2   16.15    0.55
   2  20   2   15.02    0.54
   2  20   2   15.24    0.50
   2  20   2   15.50    0.51
  -3 -20  -2    2.86    0.12
  -3 -20  -2    2.91    0.13
   3  20   2    2.87    0.13
   3  20   2    2.89    0.12
  -4 -20  -2    0.01    0.03
  -4 -20  -2    0.08    0.03
   4  20   2    0.04    0.03
   4  20   2    0.03    0.03
  -5 -20  -2    5.43    0.21
  -5 -20  -2    5.56    0.18
   5  20   2    5.23    0.21
   5  20   2    5.46    0.18
  -6 -20  -2    5.28    0.17
   6  20   2    5.13    0.17
  -7  21   2    0.73    0.03
  -7  21   2    0.87    0.04
  -6  21   2    1.63    0.06
  -6  21   2    1.58    0.06
  -6  21   2    1.56    0.07
   5 -21  -2    1.11    0.06
  -5  21   2    1.22    0.06
  -5  21   2    1.19    0.06
  -5  21   2    1.27    0.06
   4 -21  -2    4.75    0.17
  -4  21   2    4.80    0.17
  -4  21   2    4.80    0.16
  -4  21   2    4.72    0.16
  -4  21   2    4.64    0.17
  -4  21   2    4.73    0.20
  -3  21   2    1.20    0.06
  -3  21   2    1.10    0.07
  -3  21   2    1.21    0.07
  -3  21   2    1.33    0.06
  -3  21   2    1.23    0.08
  -3  21   2    1.01    0.10
  -2  21   2    7.78    0.27
  -2  21   2    7.97    0.26
  -2  21   2    7.85    0.26
  -2  21   2    8.24    0.27
  -1  21   2   30.26    0.95
  -1  21   2   31.68    0.98
  -1  21   2   31.43    1.00
  -1  21   2   32.09    0.98
  -1  21   2   33.06    1.00
   0  21   2    8.06    0.27
   0  21   2    8.10    0.26
  -1 -21  -2    1.63    0.08
   1  21   2    1.61    0.09
   1  21   2    1.58    0.09
  -2 -21  -2    0.38    0.04
   2  21   2    0.44    0.05
   2  21   2    0.44    0.06
  -3 -21  -2    5.78    0.20
  -3 -21  -2    5.81    0.23
   3  21   2    6.04    0.22
   3  21   2    5.76    0.21
   3  21   2    5.66    0.20
  -4 -21  -2    4.59    0.18
   4  21   2    4.38    0.16
   4  21   2    4.35    0.17
  -5 -21  -2    0.07    0.03
   5  21   2    0.06    0.03
   5  21   2    0.08    0.02
  -6 -21  -2    1.95    0.08
   6  21   2    2.00    0.07
   6 -22  -2    0.06    0.03
  -6  22   2    0.11    0.02
  -6  22   2    0.07    0.01
  -5  22   2    5.89    0.19
  -5  22   2    5.80    0.19
  -4  22   2    3.52    0.13
  -4  22   2    3.56    0.13
  -4  22   2    3.56    0.13
  -3  22   2    0.30    0.04
  -3  22   2    0.50    0.04
  -3  22   2    0.37    0.04
  -3  22   2    0.41    0.06
  -3  22   2    0.40    0.05
  -2  22   2    3.88    0.14
  -2  22   2    3.78    0.15
  -2  22   2    3.53    0.14
  -2  22   2    4.23    0.14
  -1  22   2    4.83    0.17
  -1  22   2    4.44    0.16
  -1  22   2    4.72    0.17
  -1  22   2    4.55    0.17
  -1  22   2    4.30    0.17
   0 -22  -2    3.83    0.14
   0  22   2    3.67    0.14
   0  22   2    3.07    0.14
  -1 -22  -2    0.12    0.03
   1  22   2    0.11    0.04
   1  22   2    0.15    0.04
   1  22   2    0.16    0.05
   1  22   2    0.20    0.04
  -2 -22  -2    7.81    0.30
   2  22   2    8.71    0.29
   2  22   2    8.12    0.28
  -3 -22  -2    4.30    0.16
  -3 -22  -2    4.60    0.18
  -4 -22  -2    6.26    0.25
  -4 -22  -2    7.02    0.23
   4  22   2    6.62    0.22
  -5 -22  -2    0.91    0.06
   5  22   2    0.92    0.05
  -6 -22  -2    0.38    0.03
  -6  23   2    4.07    0.14
  -5  23   2    4.20    0.15
  -5  23   2    4.46    0.15
  -4  23   2    1.52    0.07
  -4  23   2    1.50    0.07
  -4  23   2    1.51    0.08
  -4  23   2    1.49    0.07
  -3  23   2    1.42    0.10
  -3  23   2    1.39    0.06
  -3  23   2    1.28    0.07
  -3  23   2    1.25    0.08
  -3  23   2    1.36    0.07
  -2  23   2    7.98    0.26
  -2  23   2    8.05    0.27
  -2  23   2    7.98    0.27
  -1  23   2   70.95    2.09
  -1  23   2   66.38    2.03
  -1  23   2   69.08    2.09
  -1  23   2   68.33    2.14
  -1  23   2   68.29    2.13
   0 -23  -2    3.76    0.15
   0  23   2    3.81    0.14
   0  23   2    3.91    0.15
  -1 -23  -2    1.75    0.09
   1  23   2    1.66    0.09
   1  23   2    2.00    0.09
   1  23   2    1.82    0.09
  -2 -23  -2    0.08    0.03
  -2 -23  -2    0.10    0.03
   2  23   2    0.16    0.04
   2  23   2    0.19    0.04
   2  23   2    0.13    0.04
  -3 -23  -2   10.71    0.34
  -3 -23  -2   10.60    0.39
   3  23   2   10.71    0.34
   3  23   2   10.54    0.35
  -4 -23  -2    4.86    0.17
  -4 -23  -2    4.90    0.19
   4  23   2    4.83    0.17
  -5 -23  -2    1.88    0.08
   5  23   2    1.94    0.08
   6  23   2    0.03    0.01
  -6  24   2    2.59    0.09
  -5  24   2    0.90    0.05
  -5  24   2    0.89    0.04
  -5  24   2    0.78    0.07
  -5  24   2    0.88    0.04
  -4  24   2    0.86    0.05
  -4  24   2    0.86    0.06
  -4  24   2    0.85    0.05
  -4  24   2    0.94    0.05
  -3  24   2    1.68    0.07
  -3  24   2    1.70    0.08
  -3  24   2    1.71    0.09
  -2  24   2    0.17    0.03
  -2  24   2    0.18    0.04
  -2  24   2    0.15    0.03
  -1  24   2    8.51    0.28
  -1  24   2    8.44    0.28
  -1  24   2    8.21    0.29
   0 -24  -2    0.00    0.02
   0  24   2    0.05    0.03
   0  24   2    0.01    0.03
   0  24   2    0.02    0.04
  -1 -24  -2   12.73    0.48
   1  24   2   13.42    0.43
   1  24   2   13.78    0.44
   1  24   2   13.39    0.41
  -2 -24  -2    2.98    0.13
  -2 -24  -2    3.04    0.11
   2  24   2    2.95    0.13
   2  24   2    3.03    0.12
   2  24   2    3.03    0.13
  -3 -24  -2    1.29    0.07
  -3 -24  -2    1.28    0.08
   3  24   2    1.25    0.08
  -4 -24  -2    3.59    0.13
   4  24   2    3.58    0.14
   4  24   2    3.48    0.13
  -5 -24  -2    2.60    0.10
   5  24   2    2.71    0.09
   5  24   2    2.69    0.10
  -5  25   2    0.67    0.04
  -4  25   2    1.15    0.05
  -3  25   2    2.17    0.11
  -3  25   2    2.05    0.09
  -3  25   2    2.19    0.08
  -3  25   2    1.97    0.09
  -2  25   2    0.88    0.07
  -2  25   2    0.97    0.05
  -2  25   2    0.91    0.07
  -2  25   2    1.00    0.06
  -1  25   2    0.30    0.04
  -1  25   2    0.30    0.04
   0 -25  -2    8.78    0.32
   0  25   2    8.93    0.30
   0  25   2    8.53    0.28
   0  25   2    8.75    0.29
  -1 -25  -2    2.26    0.11
   1  25   2    2.48    0.11
   1  25   2    2.33    0.11
   1  25   2    2.34    0.10
  -2 -25  -2    0.48    0.05
  -2 -25  -2    0.44    0.05
   2  25   2    0.49    0.05
   2  25   2    0.54    0.07
   2  25   2    0.52    0.06
  -3 -25  -2    1.61    0.09
  -3 -25  -2    1.67    0.08
   3  25   2    1.74    0.08
  -4 -25  -2    0.97    0.05
   4  25   2    1.00    0.05
   4  25   2    0.88    0.07
   4  25   2    0.97    0.08
  -5 -25  -2    0.14    0.02
   5  25   2    0.19    0.03
   5  25   2    0.11    0.02
  -4  26   2    0.33    0.03
  -4  26   2    0.32    0.03
  -3  26   2    0.89    0.05
  -3  26   2    0.86    0.06
  -3  26   2    0.84    0.05
  -3  26   2    0.95    0.07
  -2  26   2    2.41    0.10
  -2  26   2    2.53    0.11
  -2  26   2    2.51    0.11
   1 -26  -2    0.16    0.03
  -1  26   2    0.19    0.04
  -1  26   2    0.22    0.04
   0 -26  -2    9.66    0.36
   0  26   2   10.16    0.33
   0  26   2   10.00    0.33
  -1 -26  -2    0.12    0.03
   1  26   2    0.12    0.03
   1  26   2    0.14    0.03
   1  26   2    0.14    0.03
  -2 -26  -2    0.24    0.03
  -2 -26  -2    0.30    0.05
   2  26   2    0.27    0.04
   2  26   2    0.33    0.05
  -3 -26  -2    3.71    0.13
   3  26   2    3.66    0.13
   3  26   2    3.53    0.13
   3  26   2    3.46    0.14
  -4 -26  -2    0.05    0.02
   4  26   2    0.06    0.02
   5  26   2    0.62    0.03
   5  26   2    0.55    0.03
  -4  27   2    0.09    0.02
  -3  27   2    2.07    0.10
  -2  27   2    9.37    0.29
  -2  27   2    7.89    0.29
  -1  27   2    3.24    0.13
  -1  27   2    3.22    0.13
   0 -27  -2    3.79    0.16
   0  27   2    3.85    0.14
   0  27   2    3.96    0.15
   1  27   2    1.91    0.09
   1  27   2    1.84    0.09
   1  27   2    1.97    0.09
  -2 -27  -2    1.62    0.07
   2  27   2    1.79    0.08
  -3 -27  -2    1.87    0.08
   3  27   2    1.75    0.07
   3  27   2    1.82    0.08
  -4 -27  -2    0.58    0.04
   4  27   2    0.63    0.04
   4  27   2    0.54    0.04
  -3  28   2    0.63    0.07
  -3  28   2    0.56    0.05
  -2  28   2    3.00    0.12
  -2  28   2    3.14    0.12
  -1  28   2    1.22    0.07
  -1  28   2    1.34    0.07
   0 -28  -2    1.15    0.07
   0  28   2    1.16    0.07
   0  28   2    1.18    0.07
  -1 -28  -2    0.41    0.04
   1  28   2    0.27    0.03
  -2 -28  -2    1.27    0.06
   2  28   2    1.32    0.07
  -3 -28  -2    0.00    0.02
   3  28   2    0.03    0.02
   3  28   2    0.03    0.02
   3  28   2    0.04    0.02
  -4 -28  -2    1.39    0.06
   4  28   2    1.46    0.06
   4  28   2    1.44    0.06
  -3  29   2    1.14    0.06
  -2  29   2    0.08    0.02
  -2  29   2    0.16    0.03
  -1  29   2    0.04    0.02
  -1  29   2    0.06    0.02
   0  29   2    0.36    0.04
   0  29   2    0.34    0.04
  -1 -29  -2    0.15    0.02
   1  29   2    0.16    0.03
   1  29   2    0.12    0.03
  -2 -29  -2    5.54    0.18
   2  29   2    5.32    0.19
  -3 -29  -2    0.41    0.03
   3  29   2    0.41    0.04
   3  29   2    0.38    0.04
   3  29   2    0.44    0.03
  -3  30   2    0.67    0.04
  -2  30   2    0.04    0.02
  -1  30   2    0.05    0.02
  -1  30   2    0.05    0.02
   0  30   2    0.15    0.03
  -1 -30  -2    0.00    0.02
   1  30   2   -0.04    0.02
  -2 -30  -2    0.01    0.02
   2  30   2    0.06    0.02
   2  30   2   -0.01    0.02
  -2  31   2    0.03    0.02
  -1  31   2    0.49    0.04
  -1  31   2    0.53    0.04
   0 -31  -2    0.01    0.02
   0  31   2    0.06    0.02
   0  31   2    0.04    0.02
  -1 -31  -2    3.73    0.12
   1  31   2    3.65    0.13
  -2 -31  -2    0.01    0.01
   2  31   2    0.00    0.02
   0 -32  -2    3.09    0.10
   0  32   2    3.11    0.11
   0  32   2    3.08    0.11
   2  31  -3    0.39    0.03
  -2 -31   3    0.40    0.03
   1  31  -3    2.52    0.09
   1  31  -3    2.63    0.09
   1  31  -3    2.66    0.10
  -1 -31   3    2.55    0.09
   0  31  -3    0.03    0.02
   0  31  -3    0.00    0.02
  -1  31  -3    0.24    0.03
   3  30  -3    0.56    0.03
   3  30  -3    0.53    0.04
  -3 -30   3    0.51    0.03
   2  30  -3    1.58    0.07
  -2 -30   3    1.63    0.06
   1  30  -3    0.86    0.05
   1  30  -3    0.73    0.05
   1  30  -3    0.80    0.05
  -1 -30   3    0.78    0.04
   0  30  -3    0.13    0.02
   0  30  -3    0.13    0.03
  -1  30  -3    1.54    0.07
  -1  30  -3    1.55    0.07
  -2  30  -3    0.55    0.04
   4  29  -3    0.12    0.02
   4  29  -3    0.10    0.02
  -4 -29   3    0.15    0.02
   3  29  -3    0.06    0.02
   3  29  -3    0.04    0.02
  -3 -29   3    0.04    0.02
   2  29  -3    1.42    0.07
   2  29  -3    1.46    0.07
  -2 -29   3    1.55    0.06
   1  29  -3    0.08    0.02
  -1 -29   3    0.08    0.02
   0  29  -3    0.99    0.06
   0  29  -3    0.92    0.06
  -1  29  -3    2.30    0.09
  -1  29  -3    2.33    0.10
  -2  29  -3    2.43    0.09
  -2  29  -3    2.53    0.10
  -3  29  -3    1.53    0.06
   4  28  -3    0.20    0.03
   4  28  -3    0.24    0.03
   4  28  -3    0.17    0.02
  -4 -28   3    0.15    0.02
   3  28  -3    4.40    0.16
  -3 -28   3    4.53    0.15
   2  28  -3    0.76    0.05
   1  28  -3    0.31    0.04
   0  28  -3    1.60    0.07
   0  28  -3    1.47    0.08
  -1  28  -3    0.87    0.05
  -1  28  -3    0.87    0.06
  -2  28  -3    0.02    0.02
  -2  28  -3    0.01    0.02
  -2  28  -3   -0.01    0.03
  -3  28  -3    0.74    0.04
  -5 -27   3    1.67    0.06
   4  27  -3    1.51    0.06
   4  27  -3    1.40    0.07
  -4 -27   3    1.48    0.06
   3  27  -3    0.14    0.03
  -3 -27   3    0.09    0.02
   2  27  -3   -0.02    0.02
  -2 -27   3    0.02    0.02
   1  27  -3    1.18    0.07
   1  27  -3    1.14    0.07
   0  27  -3    0.01    0.02
   0  27  -3   -0.01    0.03
  -1  27  -3    0.36    0.04
  -1  27  -3    0.26    0.04
   1 -27   3    0.28    0.04
  -2  27  -3    1.88    0.08
  -2  27  -3    1.82    0.08
  -2  27  -3    1.79    0.09
  -3  27  -3    0.99    0.06
  -3  27  -3    0.98    0.05
   3 -27   3    1.08    0.05
  -4  27  -3    0.06    0.02
  -4  27  -3    0.01    0.02
   5  26  -3    0.03    0.01
  -5 -26   3    0.01    0.02
   4  26  -3    0.11    0.03
   4  26  -3    0.09    0.02
  -4 -26   3    0.08    0.02
   3  26  -3    0.05    0.02
   3  26  -3    0.02    0.03
  -3 -26   3    0.03    0.02
   2  26  -3    0.73    0.06
   2  26  -3    0.80    0.07
  -2 -26   3    0.85    0.05
   1  26  -3    0.68    0.06
   1  26  -3    0.62    0.06
   1  26  -3    0.61    0.06
  -1 -26   3    0.62    0.06
   0  26  -3    5.23    0.19
   0  26  -3    5.12    0.18
   0  26  -3    5.57    0.19
   0 -26   3    5.15    0.20
  -1  26  -3    5.57    0.19
  -1  26  -3    5.37    0.19
   1 -26   3    5.35    0.21
  -2  26  -3    1.47    0.08
  -2  26  -3    1.46    0.07
  -2  26  -3    1.59    0.08
   3 -26   3    0.38    0.03
  -4  26  -3    0.21    0.03
  -4  26  -3    0.22    0.03
   4 -26   3    0.21    0.03
   5  25  -3    0.06    0.02
  -5 -25   3    0.06    0.02
   4  25  -3    0.58    0.06
   4  25  -3    0.69    0.05
  -4 -25   3    0.68    0.05
   3  25  -3    0.32    0.04
   3  25  -3    0.42    0.05
  -3 -25   3    0.39    0.05
   2  25  -3    1.42    0.08
   2  25  -3    1.38    0.08
   2  25  -3    1.40    0.08
   2  25  -3    1.31    0.08
  -2 -25   3    1.36    0.08
   1  25  -3    1.70    0.09
   1  25  -3    1.89    0.09
   1  25  -3    1.81    0.09
   0  25  -3    0.91    0.06
   0  25  -3    0.99    0.07
   0  25  -3    0.95    0.07
   0  25  -3    1.01    0.07
  -1  25  -3    0.98    0.06
  -1  25  -3    0.95    0.07
  -2  25  -3    0.79    0.05
  -2  25  -3    0.72    0.06
  -2  25  -3    0.77    0.07
  -3  25  -3    1.03    0.06
  -3  25  -3    1.07    0.05
  -3  25  -3    1.00    0.06
  -4  25  -3    1.16    0.05
  -4  25  -3    1.14    0.06
   4 -25   3    1.07    0.05
  -5  25  -3    0.43    0.03
   5 -25   3    0.33    0.02
   6  24  -3    0.01    0.01
  -6 -24   3    0.00    0.01
   5  24  -3    3.03    0.11
  -5 -24   3    3.04    0.11
   4  24  -3    1.59    0.07
   4  24  -3    1.42    0.08
  -4 -24   3    1.58    0.09
  -4 -24   3    1.63    0.07
  -3 -24   3    0.01    0.03
  -3 -24   3    0.00    0.02
   2  24  -3    1.76    0.09
   2  24  -3    1.75    0.09
  -2 -24   3    1.78    0.09
   1  24  -3   25.64    0.85
   1  24  -3   24.76    0.78
   1  24  -3   25.77    0.79
   1  24  -3   25.47    0.81
   0  24  -3    0.67    0.06
   0  24  -3    0.69    0.07
   0  24  -3    0.83    0.06
   0  24  -3    0.62    0.06
   0  24  -3    0.76    0.06
  -1  24  -3    1.82    0.09
  -1  24  -3    1.64    0.10
  -1  24  -3    1.86    0.09
  -1  24  -3    2.00    0.08
  -2  24  -3    1.18    0.07
  -2  24  -3    1.21    0.08
  -2  24  -3    1.25    0.08
  -2  24  -3    1.29    0.06
  -3  24  -3    0.46    0.04
  -3  24  -3    0.42    0.05
  -3  24  -3    0.49    0.04
  -4  24  -3    4.09    0.13
  -4  24  -3    4.08    0.14
   4 -24   3    3.78    0.15
  -5  24  -3    0.02    0.02
  -5  24  -3    0.02    0.02
   6  23  -3    7.84    0.25
  -6 -23   3    8.39    0.25
   5  23  -3    0.04    0.02
  -5 -23   3    0.00    0.02
   4  23  -3    3.66    0.14
   4  23  -3    3.92    0.14
  -4 -23   3    3.80    0.16
  -4 -23   3    3.84    0.14
   3  23  -3   22.49    0.71
   3  23  -3   22.09    0.69
  -3 -23   3   22.31    0.78
  -3 -23   3   22.05    0.67
   2  23  -3    9.17    0.31
   2  23  -3    9.61    0.32
  -2 -23   3    9.72    0.35
   1  23  -3   66.86    2.07
   1  23  -3   64.23    2.03
  -1 -23   3   68.20    2.27
   0  23  -3    0.00    0.03
   0  23  -3   -0.01    0.03
   0  23  -3    0.02    0.03
   0  23  -3    0.02    0.03
   0  23  -3    0.01    0.04
  -1  23  -3    4.52    0.17
  -1  23  -3    4.26    0.17
  -1  23  -3    4.50    0.16
  -1  23  -3    4.44    0.16
  -2  23  -3    1.10    0.07
  -2  23  -3    1.08    0.06
  -2  23  -3    1.09    0.06
  -2  23  -3    1.05    0.07
  -3  23  -3    4.39    0.15
  -3  23  -3    4.25    0.16
  -3  23  -3    4.42    0.16
   3 -23   3    4.28    0.16
  -4  23  -3    0.45    0.04
  -4  23  -3    0.52    0.04
  -5  23  -3    0.08    0.02
   6  22  -3    1.27    0.05
  -6 -22   3    1.21    0.06
   5  22  -3    2.89    0.12
   5  22  -3    2.89    0.11
  -5 -22   3    2.89    0.11
  -5 -22   3    2.76    0.11
   4  22  -3    0.23    0.04
  -4 -22   3    0.16    0.03
  -4 -22   3    0.20    0.04
   3  22  -3   21.83    0.69
   3  22  -3   22.38    0.71
  -3 -22   3   22.15    0.67
  -3 -22   3   22.42    0.78
   2  22  -3    0.67    0.06
   2  22  -3    0.71    0.07
   2  22  -3    0.66    0.06
  -2 -22   3    0.66    0.06
   1  22  -3   24.75    0.75
   1  22  -3   21.14    0.76
   1  22  -3   24.54    0.77
   1  22  -3   23.39    0.81
  -1 -22   3   26.39    0.84
   0  22  -3    0.91    0.07
   0  22  -3    0.87    0.08
   0  22  -3    0.80    0.06
   0  22  -3    0.82    0.06
  -1  22  -3    4.43    0.17
  -1  22  -3    4.39    0.16
  -1  22  -3    4.55    0.18
  -1  22  -3    4.46    0.16
  -1  22  -3    4.65    0.18
  -2  22  -3    4.80    0.17
  -2  22  -3    4.78    0.16
  -2  22  -3    4.85    0.18
  -2  22  -3    4.75    0.19
  -3  22  -3    1.54    0.08
  -3  22  -3    1.64    0.09
  -3  22  -3    1.61    0.09
  -4  22  -3   10.08    0.33
  -4  22  -3   10.11    0.32
  -5  22  -3    0.07    0.02
  -5  22  -3    0.07    0.02
   5 -22   3    0.09    0.02
  -6  22  -3    0.12    0.02
  -7 -21   3    6.38    0.20
   6  21  -3    0.25    0.03
  -6 -21   3    0.14    0.02
   5  21  -3    2.60    0.10
   5  21  -3    2.70    0.12
  -5 -21   3    2.86    0.11
   4  21  -3    4.50    0.16
  -4 -21   3    4.67    0.19
  -4 -21   3    4.55    0.16
   3  21  -3    5.35    0.19
   3  21  -3    5.00    0.18
  -3 -21   3    5.53    0.21
  -3 -21   3    5.25    0.18
   2  21  -3    3.14    0.12
   2  21  -3    2.86    0.13
   2  21  -3    3.10    0.13
   2  21  -3    2.83    0.12
  -2 -21   3    3.14    0.13
   1  21  -3    7.60    0.25
   1  21  -3    7.00    0.25
   1  21  -3    7.89    0.27
  -1 -21   3    7.23    0.27
   0  21  -3   10.86    0.36
   0  21  -3   10.31    0.35
   0  21  -3   11.18    0.36
   0  21  -3   11.25    0.38
  -1  21  -3    8.64    0.29
  -1  21  -3    8.72    0.29
  -1  21  -3    8.41    0.28
  -1  21  -3    8.75    0.31
   1 -21   3    8.41    0.26
  -2  21  -3    4.37    0.15
  -2  21  -3    4.08    0.17
  -2  21  -3    4.28    0.17
  -2  21  -3    4.22    0.16
  -2  21  -3    4.40    0.16
   2 -21   3    4.31    0.15
  -3  21  -3   12.21    0.42
  -3  21  -3   11.67    0.39
  -3  21  -3   12.04    0.39
  -3  21  -3   11.59    0.37
   3 -21   3   11.92    0.40
  -4  21  -3    2.51    0.12
  -4  21  -3    2.27    0.11
  -4  21  -3    2.43    0.09
  -4  21  -3    2.36    0.10
  -4  21  -3    2.42    0.09
   4 -21   3    2.39    0.10
  -5  21  -3    0.33    0.03
  -7 -20   3    1.86    0.07
   6  20  -3    1.46    0.08
   6  20  -3    1.54    0.07
  -6 -20   3    1.56    0.07
   5  20  -3    1.76    0.08
   5  20  -3    1.77    0.09
  -5 -20   3    1.86    0.10
  -5 -20   3    1.81    0.09
   4  20  -3    0.77    0.06
   4  20  -3    0.76    0.07
   4  20  -3    0.83    0.06
  -4 -20   3    0.73    0.06
  -4 -20   3    0.71    0.06
   3  20  -3    3.62    0.14
   3  20  -3    3.31    0.14
  -3 -20   3    3.69    0.15
   2  20  -3    0.24    0.05
   2  20  -3    0.24    0.04
   2  20  -3    0.24    0.04
   2  20  -3    0.19    0.04
  -2 -20   3    0.22    0.04
   1  20  -3    3.33    0.13
   1  20  -3    3.06    0.13
   1  20  -3    3.22    0.13
   1  20  -3    3.34    0.13
  -1 -20   3    3.19    0.13
   0  20  -3    0.39    0.05
   0  20  -3    0.42    0.06
   0  20  -3    0.46    0.05
  -1  20  -3    1.24    0.07
  -1  20  -3    1.18    0.07
  -1  20  -3    1.08    0.07
  -1  20  -3    1.22    0.08
   1 -20   3    1.24    0.06
  -2  20  -3    0.49    0.05
  -2  20  -3    0.52    0.05
  -2  20  -3    0.53    0.05
  -2  20  -3    0.59    0.08
   2 -20   3    0.47    0.04
  -3  20  -3    3.24    0.12
  -3  20  -3    3.19    0.13
  -3  20  -3    3.24    0.13
  -3  20  -3    3.17    0.13
  -3  20  -3    3.11    0.12
  -4  20  -3   14.02    0.46
  -4  20  -3   14.35    0.45
  -4  20  -3   13.71    0.45
   4 -20   3   14.44    0.47
  -5  20  -3    3.06    0.12
  -5  20  -3    2.99    0.11
   5 -20   3    3.13    0.12
   7  19  -3    1.53    0.06
  -7 -19   3    1.44    0.06
  -7 -19   3    1.71    0.07
  -6 -19   3    4.28    0.15
   5  19  -3    0.32    0.04
  -5 -19   3    0.27    0.04
  -5 -19   3    0.22    0.04
  -5 -19   3    0.26    0.03
  -4 -19   3    0.30    0.04
  -4 -19   3    0.23    0.04
  -4 -19   3    0.18    0.04
   3  19  -3    0.43    0.05
  -3 -19   3    0.45    0.05
   2  19  -3    6.47    0.24
   2  19  -3    6.20    0.23
  -2 -19   3    6.80    0.24
   1  19  -3    0.90    0.06
   1  19  -3    0.85    0.08
  -1 -19   3    0.93    0.05
   0  19  -3    0.16    0.04
   0  19  -3    0.13    0.03
   0  19  -3    0.21    0.04
   0  19  -3    0.16    0.04
  -1  19  -3    2.26    0.10
  -1  19  -3    2.37    0.10
   1 -19   3    2.35    0.09
  -2  19  -3    2.36    0.12
  -2  19  -3    2.54    0.11
  -2  19  -3    2.41    0.10
  -2  19  -3    2.56    0.10
   2 -19   3    2.42    0.10
  -3  19  -3   40.16    1.19
  -3  19  -3   39.07    1.22
  -3  19  -3   41.63    1.29
  -3  19  -3   38.89    1.20
   3 -19   3   35.02    1.26
  -4  19  -3   12.11    0.38
  -4  19  -3   11.95    0.39
  -4  19  -3   11.99    0.40
   4 -19   3   12.15    0.40
  -5  19  -3    4.67    0.16
  -5  19  -3    4.70    0.17
  -5  19  -3    4.69    0.16
   5 -19   3    4.80    0.17
  -6  19  -3    1.57    0.06
  -6  19  -3    1.48    0.07
  -7 -18   3    0.15    0.02
  -7 -18   3    0.11    0.02
  -6 -18   3    0.24    0.03
  -6 -18   3    0.29    0.04
   5  18  -3    0.59    0.05
  -5 -18   3    0.59    0.06
  -5 -18   3    0.48    0.06
  -5 -18   3    0.56    0.05
  -4 -18   3    8.94    0.29
  -4 -18   3    8.74    0.33
   3  18  -3    2.15    0.10
   3  18  -3    2.17    0.11
  -3 -18   3    2.29    0.11
  -3 -18   3    2.37    0.10
   2  18  -3    3.22    0.14
   2  18  -3    3.32    0.14
  -2 -18   3    3.37    0.15
  -2 -18   3    3.74    0.14
   1  18  -3    0.79    0.05
   1  18  -3    0.70    0.07
  -1 -18   3    0.79    0.05
   0  18  -3    1.17    0.08
   0  18  -3    1.22    0.06
   0  18  -3    1.23    0.07
  -1  18  -3    6.25    0.21
  -1  18  -3    6.45    0.23
  -1  18  -3    5.98    0.21
  -1  18  -3    6.03    0.22
   1 -18   3    6.22    0.21
  -2  18  -3    4.25    0.15
  -2  18  -3    3.74    0.16
  -2  18  -3    3.97    0.15
   2 -18   3    4.02    0.14
  -3  18  -3    0.96    0.07
  -3  18  -3    1.02    0.06
  -3  18  -3    1.01    0.08
  -3  18  -3    1.10    0.07
   3 -18   3    1.19    0.06
  -4  18  -3    4.14    0.16
  -4  18  -3    4.09    0.17
  -4  18  -3    4.71    0.15
   4 -18   3    4.18    0.16
  -5  18  -3   11.83    0.38
  -5  18  -3   11.71    0.37
   5 -18   3   11.68    0.39
  -6  18  -3    0.35    0.04
  -6  18  -3    0.29    0.03
   6 -18   3    0.26    0.03
  -7 -17   3    0.02    0.02
  -7 -17   3    0.00    0.02
  -6 -17   3    1.05    0.06
  -6 -17   3    1.01    0.07
  -6 -17   3    1.03    0.06
   5  17  -3    0.10    0.03
   5  17  -3    0.14    0.03
  -5 -17   3    0.11    0.03
  -5 -17   3    0.11    0.04
   4  17  -3    0.13    0.03
   4  17  -3    0.19    0.06
  -4 -17   3    0.17    0.04
  -4 -17   3    0.16    0.04
   3  17  -3    4.05    0.15
   3  17  -3    3.96    0.16
  -3 -17   3    3.93    0.16
   2  17  -3    0.15    0.03
  -2 -17   3    0.14    0.03
   1  17  -3    1.23    0.07
   0  17  -3    1.00    0.06
   0 -17   3    0.91    0.05
  -1  17  -3    0.06    0.04
  -1  17  -3    0.05    0.02
   1 -17   3    0.07    0.02
  -2  17  -3    0.00    0.03
  -2  17  -3    0.00    0.06
  -2  17  -3    0.01    0.03
   2 -17   3    0.01    0.02
  -3  17  -3    0.99    0.07
  -3  17  -3    1.02    0.06
  -3  17  -3    0.98    0.08
  -3  17  -3    1.02    0.06
  -3  17  -3    1.03    0.07
   3 -17   3    1.03    0.05
  -4  17  -3    1.75    0.09
  -4  17  -3    1.70    0.11
  -4  17  -3    1.82    0.08
   4 -17   3    1.82    0.08
  -5  17  -3    3.40    0.12
  -5  17  -3    3.40    0.12
  -5  17  -3    3.39    0.13
  -5  17  -3    3.40    0.12
   5 -17   3    3.24    0.13
  -6  17  -3    0.36    0.04
   6 -17   3    0.31    0.04
  -7  17  -3    0.34    0.03
  -8 -16   3    0.68    0.04
  -8 -16   3    0.66    0.03
  -8 -16   3    0.62    0.03
   7  16  -3    0.69    0.05
  -7 -16   3    0.69    0.05
  -7 -16   3    0.76    0.05
   6  16  -3    8.08    0.30
  -6 -16   3    7.99    0.27
  -6 -16   3    8.28    0.31
  -6 -16   3    8.44    0.27
   5  16  -3    3.15    0.13
  -5 -16   3    2.99    0.12
  -5 -16   3    3.01    0.14
   4  16  -3    4.27    0.17
   4  16  -3    4.46    0.17
  -4 -16   3    4.37    0.16
  -4 -16   3    4.37    0.18
   3  16  -3    0.94    0.05
   3  16  -3    0.90    0.09
  -3 -16   3    0.97    0.06
  -3 -16   3    1.25    0.13
   2  16  -3    0.69    0.06
   2  16  -3    0.68    0.05
  -2 -16   3    0.65    0.05
  -2 -16   3    0.75    0.09
  -1 -16   3    0.19    0.05
   0  16  -3    5.11    0.18
   0 -16   3    4.94    0.17
  -1  16  -3    0.87    0.05
   1 -16   3    0.79    0.04
   2 -16   3    2.80    0.10
  -3  16  -3   15.67    0.51
  -3  16  -3   15.06    0.51
  -3  16  -3   16.19    0.54
   3 -16   3   16.83    0.53
  -4  16  -3    0.79    0.07
  -4  16  -3    0.76    0.04
  -4  16  -3    0.74    0.06
  -4  16  -3    0.70    0.05
  -4  16  -3    0.93    0.10
  -4  16  -3    0.76    0.06
   4 -16   3    0.57    0.04
  -5  16  -3    0.46    0.05
  -5  16  -3    0.60    0.05
  -5  16  -3    0.49    0.04
   5 -16   3    0.56    0.04
  -6  16  -3    1.16    0.05
  -6  16  -3    1.17    0.06
  -6  16  -3    1.20    0.06
  -7  16  -3    0.33    0.04
  -8 -15   3    0.27    0.03
  -8 -15   3    0.31    0.03
  -8 -15   3    0.37    0.03
  -7 -15   3    0.88    0.05
  -7 -15   3    0.72    0.05
   6  15  -3    5.25    0.19
  -6 -15   3    4.95    0.17
  -6 -15   3    4.95    0.17
  -6 -15   3    4.79    0.20
   5  15  -3    0.50    0.04
   5  15  -3    0.41    0.05
   4  15  -3    3.90    0.15
  -4 -15   3    3.82    0.16
   3  15  -3    1.82    0.08
  -3 -15   3    1.71    0.08
  -3 -15   3    1.68    0.12
   2  15  -3    7.28    0.26
   2  15  -3    7.53    0.26
  -2 -15   3    7.19    0.30
  -2 -15   3    7.42    0.27
   1  15  -3    0.22    0.03
  -1 -15   3    0.33    0.05
   0  15  -3    1.02    0.06
   0 -15   3    1.10    0.05
   0 -15   3    0.98    0.07
  -1  15  -3    2.15    0.09
   1 -15   3    2.23    0.08
   2 -15   3   21.66    0.71
  -3  15  -3    0.66    0.05
  -3  15  -3    0.46    0.04
  -3  15  -3    0.59    0.06
   3 -15   3    0.63    0.04
  -4  15  -3    0.04    0.03
  -4  15  -3    0.08    0.03
  -4  15  -3    0.08    0.03
  -4  15  -3    0.04    0.02
  -4  15  -3    0.03    0.03
   4 -15   3    0.07    0.02
  -5  15  -3    1.58    0.08
  -5  15  -3    1.67    0.07
  -5  15  -3    1.52    0.07
   5 -15   3    1.63    0.07
  -6  15  -3   13.90    0.41
  -6  15  -3   13.51    0.43
  -6  15  -3   13.10    0.42
  -6  15  -3   13.34    0.42
   6 -15   3   13.35    0.45
  -8 -14   3    0.14    0.02
  -8 -14   3    0.16    0.02
   7  14  -3    0.76    0.05
  -7 -14   3    0.79    0.05
  -7 -14   3    0.78    0.05
   6  14  -3    0.13    0.03
  -6 -14   3    0.16    0.03
  -6 -14   3    0.16    0.03
  -6 -14   3    0.13    0.04
   5  14  -3    0.31    0.04
  -5 -14   3    0.27    0.04
  -5 -14   3    0.31    0.04
   4  14  -3    0.03    0.02
  -4 -14   3    0.04    0.03
   3  14  -3    1.56    0.07
  -3 -14   3    1.55    0.08
   2  14  -3    1.92    0.08
   2  14  -3    1.79    0.08
  -2 -14   3    1.95    0.10
  -2 -14   3    1.94    0.08
   1  14  -3    2.14    0.09
  -1 -14   3    2.30    0.10
   0  14  -3    6.93    0.24
   0 -14   3    6.82    0.23
   0 -14   3    7.17    0.27
  -1  14  -3    6.91    0.24
   1 -14   3    7.01    0.27
   1 -14   3    6.79    0.23
  -2  14  -3    3.94    0.16
  -3  14  -3    1.30    0.06
  -3  14  -3    1.07    0.07
   3 -14   3    1.31    0.06
  -5  14  -3    0.03    0.03
  -5  14  -3    0.10    0.02
  -5  14  -3    0.13    0.03
   5 -14   3    0.05    0.02
  -6  14  -3   11.87    0.38
  -6  14  -3   12.04    0.36
  -6  14  -3   11.57    0.37
  -6  14  -3   11.65    0.37
   6 -14   3   11.59    0.40
  -7  14  -3    0.43    0.03
  -7  14  -3    0.42    0.04
  -8 -13   3    2.68    0.10
  -8 -13   3    2.73    0.09
  -8 -13   3    2.64    0.10
  -7 -13   3    0.15    0.03
  -7 -13   3    0.17    0.03
   6  13  -3   10.99    0.39
  -6 -13   3   10.44    0.43
  -6 -13   3   10.91    0.34
  -6 -13   3   10.92    0.35
  -6 -13   3   10.59    0.40
   5  13  -3    1.72    0.08
   5  13  -3    1.61    0.08
  -5 -13   3    1.51    0.09
   4  13  -3    4.25    0.16
  -4 -13   3    4.11    0.17
   3  13  -3    0.23    0.04
   3  13  -3    0.16    0.03
  -3 -13   3    0.17    0.03
  -3 -13   3    0.18    0.04
   2  13  -3    1.56    0.07
   2  13  -3    1.61    0.07
  -2 -13   3    1.20    0.07
   1  13  -3    5.01    0.17
   1  13  -3    4.45    0.20
  -1 -13   3    4.56    0.16
   0  13  -3    2.14    0.11
   0  13  -3    2.34    0.09
   0 -13   3    2.12    0.08
   1 -13   3    0.88    0.04
  -2  13  -3    1.29    0.06
  -2  13  -3    1.30    0.06
   2 -13   3    1.11    0.05
  -3  13  -3    0.38    0.05
  -3  13  -3    0.41    0.04
  -3  13  -3    0.41    0.04
   3 -13   3    0.34    0.03
  -4  13  -3    2.75    0.10
  -4  13  -3    2.90    0.12
  -4  13  -3    2.81    0.12
  -4  13  -3    3.15    0.13
  -4  13  -3    2.79    0.11
   4 -13   3    2.90    0.11
  -5  13  -3    0.43    0.04
  -5  13  -3    0.45    0.05
  -5  13  -3    0.39    0.04
   5 -13   3    0.37    0.04
  -6  13  -3   12.86    0.39
  -6  13  -3   12.98    0.42
  -6  13  -3   12.47    0.40
  -6  13  -3   12.75    0.40
   6 -13   3   13.08    0.43
  -7  13  -3    0.12    0.02
  -8 -12   3    0.09    0.02
  -8 -12   3    0.05    0.02
  -8 -12   3    0.07    0.02
   7  12  -3    0.03    0.03
  -7 -12   3    0.01    0.02
  -7 -12   3    0.02    0.02
  -7 -12   3    0.03    0.03
   6  12  -3    1.55    0.08
  -6 -12   3    1.56    0.08
  -6 -12   3    1.44    0.11
  -6 -12   3    1.56    0.09
  -6 -12   3    1.55    0.08
   5  12  -3   10.76    0.39
  -5 -12   3   11.43    0.35
  -5 -12   3   10.58    0.40
   4  12  -3   11.23    0.38
  -4 -12   3   10.54    0.39
   3  12  -3    0.53    0.04
  -3 -12   3    0.52    0.06
  -3 -12   3    0.63    0.05
   2  12  -3    1.06    0.05
   2  12  -3    1.03    0.06
  -2 -12   3    1.07    0.05
   1  12  -3   13.41    0.53
   1  12  -3   14.62    0.47
   0  12  -3    3.96    0.16
   0  12  -3    3.96    0.14
   0 -12   3    3.80    0.13
  -1  12  -3   39.77    1.51
  -1  12  -3   40.97    1.34
   1 -12   3   41.89    1.32
  -2  12  -3   25.53    0.92
   2 -12   3   24.79    0.93
   2 -12   3   24.68    0.81
  -3  12  -3    2.65    0.11
  -3  12  -3    2.76    0.11
   3 -12   3    2.64    0.10
  -4  12  -3    0.12    0.04
  -4  12  -3    0.05    0.04
  -4  12  -3    0.12    0.03
  -4  12  -3    0.06    0.03
  -4  12  -3    0.08    0.03
  -4  12  -3    0.09    0.04
   4 -12   3    0.05    0.02
  -5  12  -3    0.79    0.06
   5 -12   3    0.77    0.05
  -6  12  -3    8.51    0.27
  -6  12  -3    8.74    0.28
  -6  12  -3    8.85    0.29
   6 -12   3    8.71    0.30
  -7  12  -3    0.73    0.04
  -7  12  -3    0.70    0.04
   8  11  -3    0.22    0.02
  -8 -11   3    0.24    0.03
  -8 -11   3    0.22    0.02
  -8 -11   3    0.21    0.03
   7  11  -3   -0.01    0.02
   7  11  -3    0.04    0.03
  -7 -11   3   -0.02    0.02
  -7 -11   3    0.00    0.03
  -7 -11   3    0.00    0.03
  -7 -11   3    0.01    0.07
   6  11  -3    5.61    0.22
  -6 -11   3    5.84    0.25
  -6 -11   3    5.71    0.23
  -6 -11   3    5.83    0.20
   5  11  -3    0.40    0.04
  -5 -11   3    0.40    0.05
   4  11  -3    1.53    0.07
  -4 -11   3    1.69    0.08
   3  11  -3    3.46    0.13
  -3 -11   3    3.48    0.14
   2  11  -3    0.24    0.03
  -2 -11   3    0.22    0.03
   1  11  -3   42.91    1.70
  -1 -11   3   48.98    1.70
   0  11  -3    6.60    0.22
   0  11  -3    6.15    0.25
   0 -11   3    6.36    0.21
  -1  11  -3   44.44    1.67
  -1  11  -3   44.03    1.49
  -1  11  -3   45.74    1.66
   1 -11   3   47.18    1.67
   1 -11   3   45.17    1.46
  -2  11  -3   32.03    1.18
  -2  11  -3   32.69    1.06
   2 -11   3   31.55    1.04
  -3  11  -3    0.04    0.02
  -3  11  -3    0.03    0.02
   3 -11   3    0.02    0.02
  -4  11  -3    0.41    0.04
  -4  11  -3    0.44    0.05
  -4  11  -3    0.48    0.06
  -4  11  -3    0.42    0.07
  -4  11  -3    0.48    0.04
  -4  11  -3    0.45    0.05
  -4  11  -3    0.43    0.05
   4 -11   3    0.45    0.04
  -5  11  -3    1.07    0.07
  -5  11  -3    0.94    0.06
  -5  11  -3    1.09    0.06
  -5  11  -3    0.92    0.06
   5 -11   3    0.92    0.08
   5 -11   3    1.04    0.06
  -6  11  -3   18.57    0.58
  -6  11  -3   18.76    0.56
  -6  11  -3   17.46    0.56
  -6  11  -3   18.37    0.54
   6 -11   3   17.47    0.53
   6 -11   3   17.51    0.60
  -7  11  -3   14.00    0.41
   7 -11   3   13.31    0.45
  -8  11  -3    0.01    0.01
   8  10  -3    1.36    0.06
  -8 -10   3    1.36    0.06
  -8 -10   3    1.35    0.06
  -8 -10   3    1.32    0.06
   7  10  -3    0.63    0.05
  -7 -10   3    0.75    0.06
  -7 -10   3    0.61    0.05
  -7 -10   3    0.58    0.08
  -7 -10   3    0.65    0.05
  -6 -10   3    0.43    0.07
  -6 -10   3    0.47    0.05
  -6 -10   3    0.40    0.04
   5  10  -3    0.52    0.04
  -5 -10   3    0.54    0.05
   4  10  -3    4.31    0.16
   4  10  -3    4.30    0.18
  -4 -10   3    4.18    0.17
   3  10  -3    7.24    0.26
  -3 -10   3    7.47    0.27
   2  10  -3    2.02    0.08
   2  10  -3    1.77    0.08
   1  10  -3   12.99    0.51
  -1 -10   3   14.39    0.51
   0  10  -3    4.69    0.19
   0 -10   3    4.81    0.18
  -1  10  -3   26.32    0.87
  -1  10  -3   26.11    0.98
  -1  10  -3   27.84    0.97
   1 -10   3   25.20    0.85
   1 -10   3   26.70    0.98
  -2  10  -3    0.15    0.02
  -2  10  -3    0.13    0.03
  -2  10  -3    0.14    0.02
   2 -10   3    0.13    0.02
  -3  10  -3    0.00    0.02
  -3  10  -3    0.01    0.01
  -3  10  -3    0.00    0.03
  -4  10  -3    0.24    0.04
  -4  10  -3    0.25    0.04
  -4  10  -3    0.28    0.04
  -4  10  -3    0.34    0.04
  -4  10  -3    0.37    0.05
  -4  10  -3    0.28    0.03
  -5  10  -3    1.45    0.08
  -5  10  -3    1.55    0.09
  -5  10  -3    1.54    0.07
  -5  10  -3    1.58    0.07
  -5  10  -3    1.57    0.09
   5 -10   3    1.54    0.07
   5 -10   3    1.56    0.08
  -6  10  -3    0.04    0.03
  -6  10  -3    0.02    0.02
  -6  10  -3   -0.02    0.03
  -6  10  -3    0.01    0.03
  -6  10  -3   -0.02    0.02
  -6  10  -3    0.00    0.02
   6 -10   3    0.02    0.02
   6 -10   3    0.04    0.03
  -7  10  -3   16.80    0.50
  -7  10  -3   16.53    0.52
   7 -10   3   16.74    0.55
  -8  10  -3    0.85    0.04
  -8  10  -3    0.83    0.04
   8   9  -3    0.54    0.04
  -8  -9   3    0.52    0.04
  -8  -9   3    0.44    0.04
   7   9  -3    0.09    0.03
   7   9  -3    0.12    0.03
  -7  -9   3    0.14    0.04
  -7  -9   3    0.09    0.03
  -7  -9   3    0.13    0.06
  -7  -9   3    0.08    0.03
  -6  -9   3    0.26    0.05
  -6  -9   3    0.23    0.04
   5   9  -3    2.68    0.11
  -5  -9   3    2.36    0.11
   4   9  -3    0.42    0.04
   4   9  -3    0.36    0.05
  -4  -9   3    0.38    0.04
   3   9  -3    0.00    0.02
  -3  -9   3    0.01    0.02
  -3  -9   3   -0.01    0.03
   2   9  -3    0.67    0.05
   2   9  -3    0.69    0.04
   1   9  -3    0.91    0.05
  -1  -9   3    0.98    0.05
   0   9  -3   33.02    1.12
   0   9  -3   34.10    1.26
   0  -9   3   35.17    1.26
  -1   9  -3   22.95    0.87
  -1   9  -3   23.84    0.87
   1  -9   3   24.18    0.87
   1  -9   3   23.23    0.76
  -2   9  -3    2.72    0.10
  -2   9  -3    2.67    0.12
  -2   9  -3    2.84    0.11
   2  -9   3    2.78    0.11
  -3   9  -3    0.28    0.03
  -3   9  -3    0.28    0.03
   3  -9   3    0.30    0.04
  -4   9  -3    3.64    0.15
  -4   9  -3    3.77    0.14
  -4   9  -3    3.48    0.14
  -5   9  -3    0.07    0.03
  -5   9  -3    0.03    0.02
  -5   9  -3    0.03    0.03
  -5   9  -3    0.06    0.04
  -5   9  -3   -0.01    0.02
   5  -9   3    0.04    0.02
  -6   9  -3    0.79    0.05
  -6   9  -3    0.80    0.05
  -6   9  -3    0.77    0.05
  -6   9  -3    0.83    0.06
  -6   9  -3    0.84    0.07
   6  -9   3    0.86    0.05
   6  -9   3    0.80    0.05
  -7   9  -3   14.02    0.43
  -7   9  -3   14.36    0.44
   7  -9   3   14.13    0.47
   7  -9   3   14.27    0.42
  -8   9  -3    0.64    0.03
  -8   9  -3    0.62    0.03
  -9  -8   3    0.19    0.02
  -9  -8   3    0.17    0.02
   8   8  -3    0.13    0.02
  -8  -8   3    0.18    0.02
  -8  -8   3    0.11    0.02
   7   8  -3    0.20    0.03
  -7  -8   3    0.27    0.06
  -7  -8   3    0.22    0.04
  -7  -8   3    0.24    0.03
   6   8  -3    2.39    0.11
  -6  -8   3    2.48    0.11
  -6  -8   3    2.40    0.12
   5   8  -3    7.66    0.26
   5   8  -3    8.74    0.30
  -5  -8   3    8.00    0.30
   4   8  -3    1.40    0.08
   4   8  -3    1.47    0.07
  -4  -8   3    1.39    0.07
   3   8  -3    2.69    0.10
  -3  -8   3    2.72    0.11
  -3  -8   3    2.57    0.10
   2   8  -3   15.09    0.52
  -2  -8   3   15.31    0.53
  -1  -8   3   18.31    0.68
   0   8  -3   12.82    0.49
   0   8  -3   12.92    0.49
   0  -8   3   13.60    0.49
  -1   8  -3    4.52    0.18
  -1   8  -3    4.52    0.17
   1  -8   3    4.84    0.18
   1  -8   3    4.54    0.16
  -2   8  -3   65.92    2.41
  -2   8  -3   67.06    2.22
  -2   8  -3   66.29    2.40
  -2   8  -3   61.67    2.14
   2  -8   3   66.25    2.41
  -3   8  -3   17.22    0.66
  -3   8  -3   17.78    0.60
  -3   8  -3   17.79    0.62
   3  -8   3   18.56    0.67
  -4   8  -3    0.18    0.03
  -4   8  -3    0.17    0.03
  -5   8  -3    8.60    0.29
  -5   8  -3    8.35    0.31
  -5   8  -3    8.20    0.26
  -5   8  -3    8.78    0.28
  -5   8  -3    8.94    0.27
  -6   8  -3    2.78    0.10
  -6   8  -3    3.10    0.11
  -6   8  -3    2.79    0.12
  -6   8  -3    2.83    0.12
   6  -8   3    2.74    0.10
   6  -8   3    2.90    0.11
  -7   8  -3   13.71    0.48
  -7   8  -3   13.76    0.41
  -7   8  -3   13.58    0.43
   7  -8   3   13.39    0.45
   7  -8   3   13.63    0.40
  -8   8  -3    0.78    0.04
  -8   8  -3    0.77    0.04
  -8   8  -3    0.74    0.04
  -9  -7   3    0.83    0.04
  -9  -7   3    0.87    0.04
  -9  -7   3    0.87    0.04
   8   7  -3    0.29    0.04
  -8  -7   3    0.28    0.04
  -8  -7   3    0.21    0.03
   7   7  -3    5.64    0.21
  -7  -7   3    5.75    0.20
  -7  -7   3    5.48    0.24
  -7  -7   3    5.80    0.19
  -7  -7   3    5.62    0.19
   6   7  -3    1.63    0.08
  -6  -7   3    1.51    0.09
  -6  -7   3    1.48    0.08
   5   7  -3    0.60    0.05
  -5  -7   3    0.59    0.05
   4   7  -3    0.73    0.06
   4   7  -3    0.65    0.04
  -4  -7   3    0.88    0.05
   3   7  -3    6.63    0.23
  -3  -7   3    6.28    0.22
   2   7  -3   15.37    0.53
   1   7  -3    0.84    0.04
  -1  -7   3    1.03    0.05
   0   7  -3   97.52    3.58
   0   7  -3   95.29    3.58
   0  -7   3   97.96    3.59
  -1   7  -3    5.09    0.18
  -1   7  -3    4.92    0.19
   1  -7   3    4.72    0.19
  -2   7  -3   22.67    0.81
  -2   7  -3   20.78    0.73
  -2   7  -3   22.18    0.82
  -2   7  -3   22.30    0.75
   2  -7   3   21.78    0.81
  -3   7  -3    2.98    0.14
  -3   7  -3    3.38    0.12
  -3   7  -3    3.30    0.13
  -4   7  -3    6.69    0.25
  -5   7  -3    2.39    0.10
  -5   7  -3    2.25    0.10
  -5   7  -3    2.39    0.10
  -5   7  -3    2.43    0.11
  -6   7  -3    2.73    0.11
  -6   7  -3    2.98    0.11
  -6   7  -3    2.97    0.11
  -6   7  -3    2.82    0.12
  -6   7  -3    2.87    0.12
   6  -7   3    3.10    0.12
   6  -7   3    2.95    0.11
  -7   7  -3    1.59    0.06
  -7   7  -3    1.50    0.07
  -7   7  -3    1.42    0.08
  -7   7  -3    1.47    0.07
   7  -7   3    1.53    0.07
   7  -7   3    1.58    0.06
  -8   7  -3    2.60    0.09
  -8   7  -3    2.51    0.09
  -8   7  -3    2.56    0.09
   8  -7   3    2.55    0.08
   9   6  -3    0.34    0.03
  -9  -6   3    0.41    0.03
  -9  -6   3    0.50    0.03
  -9  -6   3    0.40    0.03
  -9  -6   3    0.42    0.03
   8   6  -3    0.42    0.04
   8   6  -3    0.33    0.04
  -8  -6   3    0.35    0.04
  -8  -6   3    0.32    0.04
  -8  -6   3    0.36    0.04
  -7  -6   3    0.03    0.05
  -7  -6   3    0.01    0.03
  -7  -6   3    0.00    0.03
  -7  -6   3    0.03    0.03
   6   6  -3   14.21    0.49
  -6  -6   3   14.02    0.54
  -6  -6   3   13.57    0.50
   5   6  -3   19.15    0.68
  -5  -6   3   19.61    0.74
  -5  -6   3   20.07    0.69
   4   6  -3   17.88    0.66
   4   6  -3   17.12    0.61
  -4  -6   3   17.57    0.61
   3   6  -3    5.02    0.18
  -3  -6   3    4.95    0.18
  -3  -6   3    5.27    0.20
   2   6  -3   10.11    0.38
   1   6  -3    0.59    0.03
  -1  -6   3    0.66    0.03
   0   6  -3   59.43    2.07
   0   6  -3   48.44    2.05
   0  -6   3   59.11    2.07
  -1   6  -3    0.24    0.02
  -2   6  -3   17.96    0.65
  -2   6  -3   17.09    0.66
   2  -6   3   18.22    0.66
  -3   6  -3    5.55    0.21
  -3   6  -3    5.72    0.20
  -3   6  -3    5.34    0.22
  -4   6  -3    0.28    0.03
  -4   6  -3    0.24    0.03
  -5   6  -3   17.84    0.58
  -5   6  -3   17.87    0.56
  -6   6  -3    0.60    0.05
  -6   6  -3    0.61    0.05
  -6   6  -3    0.62    0.05
  -6   6  -3    0.58    0.07
   6  -6   3    0.54    0.05
   6  -6   3    0.64    0.05
  -7   6  -3    0.76    0.07
  -7   6  -3    0.98    0.05
  -7   6  -3    0.97    0.05
  -7   6  -3    0.83    0.06
   7  -6   3    0.74    0.05
  -8   6  -3    1.80    0.06
  -8   6  -3    1.64    0.07
   8  -6   3    1.79    0.06
   9   5  -3    2.49    0.08
  -9  -5   3    2.37    0.09
  -9  -5   3    2.67    0.09
  -9  -5   3    2.58    0.09
   8   5  -3    0.09    0.02
  -8  -5   3    0.14    0.03
  -8  -5   3    0.07    0.02
  -8  -5   3    0.10    0.03
  -8  -5   3    0.11    0.03
   7   5  -3    0.59    0.05
  -7  -5   3    0.54    0.06
  -7  -5   3    0.57    0.08
  -7  -5   3    0.57    0.05
  -7  -5   3    0.61    0.05
   6   5  -3    4.92    0.19
  -6  -5   3    4.90    0.21
  -6  -5   3    4.97    0.20
   5   5  -3    0.40    0.04
  -5  -5   3    0.33    0.04
  -5  -5   3    0.34    0.04
   4   5  -3    0.95    0.05
  -4  -5   3    0.92    0.05
   3   5  -3   24.48    0.85
  -3  -5   3   25.10    0.80
  -3  -5   3   24.69    0.92
   2   5  -3   17.27    0.64
   1   5  -3    0.71    0.03
  -1  -5   3    0.69    0.03
   0   5  -3    4.10    0.15
   0  -5   3    3.93    0.15
  -1   5  -3    1.31    0.06
  -1   5  -3    1.35    0.05
  -1   5  -3    1.36    0.06
   1  -5   3    1.41    0.06
  -2   5  -3   37.88    1.43
  -2   5  -3   39.24    1.32
  -2   5  -3   38.05    1.42
   2  -5   3   40.06    1.43
  -3   5  -3   20.43    0.65
  -3   5  -3   18.05    0.69
  -3   5  -3   17.83    0.70
  -4   5  -3    1.18    0.06
  -4   5  -3    1.12    0.05
   4  -5   3    0.95    0.08
  -5   5  -3    0.24    0.04
  -5   5  -3    0.22    0.04
  -5   5  -3    0.28    0.05
  -6   5  -3    1.88    0.10
  -6   5  -3    1.80    0.09
  -6   5  -3    1.85    0.08
  -6   5  -3    1.96    0.09
   6  -5   3    1.89    0.08
  -7   5  -3    0.02    0.04
  -7   5  -3   -0.01    0.02
  -7   5  -3    0.04    0.02
  -7   5  -3    0.03    0.02
  -7   5  -3   -0.01    0.02
   7  -5   3    0.05    0.02
   7  -5   3    0.04    0.02
  -8   5  -3    6.74    0.22
  -8   5  -3    6.87    0.21
  -8   5  -3    6.88    0.22
   8  -5   3    6.88    0.21
   9   4  -3    2.74    0.09
  -9  -4   3    2.57    0.09
  -9  -4   3    2.82    0.09
  -9  -4   3    2.68    0.09
  -9  -4   3    2.80    0.09
  -8  -4   3    1.20    0.07
  -8  -4   3    1.13    0.06
  -8  -4   3    1.15    0.06
  -8  -4   3    1.13    0.06
  -8  -4   3    1.20    0.06
   7   4  -3    0.53    0.05
  -7  -4   3    0.69    0.08
  -7  -4   3    0.58    0.05
  -7  -4   3    0.58    0.05
   6   4  -3    0.78    0.05
  -6  -4   3    0.80    0.06
  -6  -4   3    0.72    0.06
  -6  -4   3    0.83    0.06
   5   4  -3    0.07    0.02
  -5  -4   3    0.09    0.03
  -5  -4   3    0.10    0.03
   4   4  -3    0.34    0.04
  -4  -4   3    0.36    0.04
   3   4  -3    1.91    0.08
   3   4  -3    2.19    0.09
  -3  -4   3    1.97    0.08
  -3  -4   3    1.97    0.08
  -3  -4   3    2.07    0.09
   2   4  -3    0.64    0.03
  -2  -4   3    0.61    0.03
  -2  -4   3    0.67    0.03
   1   4  -3   43.05    1.57
  -1  -4   3   41.54    1.56
   0   4  -3   18.40    0.69
   0   4  -3   19.08    0.70
   0  -4   3   18.83    0.70
  -1   4  -3    6.09    0.23
  -1   4  -3    6.18    0.23
  -1   4  -3    6.31    0.24
   1  -4   3    6.41    0.24
  -2   4  -3    1.82    0.08
  -2   4  -3    1.84    0.07
   2  -4   3    1.88    0.08
  -3   4  -3    1.92    0.10
  -3   4  -3    2.19    0.08
  -4   4  -3    1.96    0.08
  -4   4  -3    1.89    0.08
   4  -4   3    1.95    0.10
  -5   4  -3    0.55    0.08
  -5   4  -3    0.68    0.06
  -6   4  -3    0.29    0.04
  -6   4  -3    0.22    0.03
  -6   4  -3    0.35    0.05
  -6   4  -3    0.18    0.03
   6  -4   3    0.26    0.03
  -7   4  -3    1.58    0.09
  -7   4  -3    1.61    0.07
  -7   4  -3    1.64    0.08
   7  -4   3    1.67    0.08
   7  -4   3    1.66    0.07
  -8   4  -3    5.69    0.19
  -8   4  -3    5.76    0.18
  -8   4  -3    5.66    0.18
   8  -4   3    5.76    0.17
   9   3  -3    2.12    0.07
  -9  -3   3    2.18    0.08
  -9  -3   3    2.28    0.08
  -9  -3   3    2.14    0.08
  -8  -3   3    2.32    0.11
  -8  -3   3    2.28    0.09
  -8  -3   3    2.47    0.10
   7   3  -3    7.98    0.29
  -7  -3   3    7.74    0.26
  -7  -3   3    7.61    0.32
  -7  -3   3    7.53    0.26
  -7  -3   3    8.14    0.25
   6   3  -3    0.32    0.04
  -6  -3   3    0.36    0.05
  -6  -3   3    0.47    0.05
  -6  -3   3    0.37    0.04
  -6  -3   3    0.45    0.05
  -6  -3   3    0.36    0.04
   5   3  -3    0.02    0.02
  -5  -3   3    0.01    0.02
   4   3  -3   15.46    0.55
  -4  -3   3   16.06    0.55
  -4  -3   3   15.71    0.60
   3   3  -3    1.46    0.07
   3   3  -3    1.65    0.07
  -3  -3   3    1.70    0.07
  -3  -3   3    1.64    0.07
  -3  -3   3    1.63    0.07
   2   3  -3   31.71    1.10
  -2  -3   3   32.42    1.10
  -2  -3   3   25.58    1.10
   1   3  -3    1.31    0.05
   1   3  -3    1.07    0.05
  -1  -3   3    1.28    0.05
  -1  -3   3    1.29    0.05
   0   3  -3   21.16    0.76
   0   3  -3   20.09    0.76
   0  -3   3   21.19    0.76
   0  -3   3   20.07    0.76
  -1   3  -3    9.33    0.35
  -1   3  -3    9.47    0.36
   1  -3   3    9.89    0.36
  -2   3  -3    8.97    0.36
  -2   3  -3    9.55    0.35
   2  -3   3    9.88    0.36
  -3   3  -3   30.26    1.10
  -3   3  -3   29.53    1.11
  -3   3  -3   29.76    1.02
  -4   3  -3   12.19    0.46
  -4   3  -3   12.43    0.43
   4  -3   3   12.66    0.47
   4  -3   3   11.79    0.42
  -5   3  -3    0.90    0.08
  -5   3  -3    0.96    0.09
  -5   3  -3    0.97    0.06
  -6   3  -3    0.25    0.03
  -6   3  -3    0.27    0.05
  -6   3  -3    0.26    0.04
   6  -3   3    0.26    0.03
  -7   3  -3    1.04    0.06
  -7   3  -3    1.11    0.07
  -7   3  -3    1.07    0.06
   7  -3   3    1.14    0.06
   7  -3   3    1.17    0.06
  -8   3  -3    2.75    0.10
  -8   3  -3    2.76    0.10
  -8   3  -3    2.62    0.09
   8  -3   3    2.70    0.09
   9   2  -3    0.11    0.02
  -9  -2   3    0.12    0.02
  -9  -2   3    0.11    0.02
  -9  -2   3    0.13    0.02
  -9  -2   3    0.12    0.02
  -8  -2   3    0.55    0.05
  -8  -2   3    0.61    0.04
  -8  -2   3    0.58    0.04
  -8  -2   3    0.57    0.05
   7   2  -3    8.22    0.28
  -7  -2   3    7.64    0.25
  -7  -2   3    7.79    0.26
  -7  -2   3    7.44    0.31
  -7  -2   3    7.16    0.29
   6   2  -3    2.32    0.10
  -6  -2   3    2.28    0.10
  -6  -2   3    2.27    0.11
  -6  -2   3    2.35    0.11
  -6  -2   3    2.43    0.11
   5   2  -3    2.35    0.10
  -5  -2   3    2.35    0.10
  -5  -2   3    2.49    0.11
   4   2  -3    0.41    0.04
  -4  -2   3    0.41    0.04
  -4  -2   3    0.50    0.04
  -4  -2   3    0.48    0.06
   3   2  -3    0.04    0.01
  -3  -2   3    0.04    0.02
  -3  -2   3    0.03    0.01
   2   2  -3   68.19    2.48
  -2  -2   3   68.18    2.47
  -2  -2   3   64.80    2.48
   1   2  -3    6.80    0.25
   1   2  -3    6.71    0.25
  -1  -2   3    6.21    0.25
  -1  -2   3    6.76    0.25
   0   2  -3  144.13    5.26
   0   2  -3  138.96    5.26
   0  -2   3  141.92    5.26
   0  -2   3  146.12    5.26
  -1   2  -3    0.08    0.01
  -1   2  -3    0.06    0.01
   1  -2   3    0.08    0.01
  -2   2  -3    0.36    0.02
  -3   2  -3    9.73    0.38
  -3   2  -3   10.54    0.38
  -3   2  -3    9.88    0.35
   3  -2   3   10.10    0.35
  -4   2  -3    9.99    0.34
  -4   2  -3    9.66    0.36
   4  -2   3    9.40    0.34
   4  -2   3    9.43    0.37
  -5   2  -3    0.10    0.06
  -5   2  -3    0.17    0.04
  -5   2  -3    0.07    0.03
   5  -2   3    0.10    0.03
  -6   2  -3    0.19    0.03
  -6   2  -3    0.27    0.05
  -6   2  -3    0.07    0.03
   6  -2   3    0.14    0.03
  -7   2  -3    1.41    0.08
  -7   2  -3    1.39    0.07
   7  -2   3    1.46    0.06
  -8   2  -3    0.19    0.02
  -8   2  -3    0.24    0.03
   8  -2   3    0.17    0.02
   9   1  -3    0.96    0.04
  -9  -1   3    0.89    0.04
  -9  -1   3    0.96    0.04
  -9  -1   3    0.94    0.04
   8   1  -3    6.05    0.22
  -8  -1   3    6.11    0.19
  -8  -1   3    5.94    0.20
  -8  -1   3    5.86    0.23
  -7  -1   3    5.72    0.25
  -7  -1   3    6.54    0.21
  -7  -1   3    5.83    0.20
  -7  -1   3    5.98    0.23
   6   1  -3    0.93    0.06
  -6  -1   3    0.91    0.06
  -6  -1   3    0.82    0.06
  -6  -1   3    0.90    0.06
  -6  -1   3    0.84    0.06
  -6  -1   3    0.99    0.07
  -5  -1   3    6.92    0.25
  -5  -1   3    6.71    0.27
   4   1  -3   21.90    0.76
  -4  -1   3   22.91    0.82
  -4  -1   3   21.22    0.82
  -4  -1   3   22.34    0.76
   3   1  -3    0.25    0.02
  -3  -1   3    0.26    0.03
  -3  -1   3    0.25    0.03
   1   1  -3    0.44    0.02
  -1  -1   3    0.41    0.02
  -1  -1   3    0.42    0.02
   0   1  -3   24.99    0.93
   0   1  -3   26.60    0.93
   0  -1   3   24.52    0.92
   0  -1   3   24.07    0.93
  -1   1  -3    0.71    0.03
  -1   1  -3    0.65    0.03
   1  -1   3    0.69    0.03
  -2   1  -3   19.02    0.71
  -2   1  -3   19.39    0.72
   2  -1   3   19.87    0.72
  -3   1  -3   48.85    1.81
  -3   1  -3   50.15    1.67
  -3   1  -3   49.81    1.79
   3  -1   3   46.85    1.66
  -4   1  -3    0.32    0.04
  -4   1  -3    0.29    0.03
   4  -1   3    0.25    0.03
   4  -1   3    0.22    0.03
  -5   1  -3    4.44    0.18
  -5   1  -3    4.42    0.18
   5  -1   3    4.74    0.17
  -6   1  -3    2.80    0.14
  -6   1  -3    3.23    0.14
  -6   1  -3    3.49    0.12
   6  -1   3    3.33    0.12
   6  -1   3    3.31    0.13
   6  -1   3    3.22    0.13
  -7   1  -3    0.13    0.03
  -7   1  -3    0.13    0.03
  -7   1  -3    0.13    0.03
   7  -1   3    0.21    0.04
   7  -1   3    0.14    0.02
  -8   1  -3    0.47    0.03
  -8   1  -3    0.44    0.03
   8  -1   3    0.47    0.03
   9   0  -3   -0.02    0.01
  -9   0   3    0.00    0.01
  -9   0   3    0.02    0.01
  -9   0   3    0.00    0.02
   8   0  -3    0.01    0.03
  -8   0   3   -0.03    0.02
  -8   0   3   -0.01    0.02
  -8   0   3    0.00    0.02
   7   0  -3    0.03    0.03
  -7   0   3    0.01    0.02
  -7   0   3   -0.01    0.02
  -7   0   3   -0.05    0.04
  -7   0   3    0.01    0.04
  -7   0   3    0.04    0.03
  -7   0   3    0.01    0.03
   6   0  -3    0.00    0.03
  -6   0   3    0.04    0.03
  -6   0   3   -0.02    0.03
  -6   0   3    0.00    0.02
  -6   0   3    0.08    0.04
   5   0  -3    0.00    0.02
  -5   0   3    0.00    0.02
  -5   0   3    0.02    0.02
   4   0  -3    0.01    0.02
  -4   0   3   -0.01    0.02
  -4   0   3   -0.02    0.02
  -4   0   3   -0.01    0.02
   3   0  -3    0.02    0.01
  -3   0   3   -0.02    0.02
  -3   0   3   -0.02    0.01
  -3   0   3   -0.01    0.01
  -3   0   3    0.01    0.01
   2   0  -3   -0.64    0.01
  -2   0   3   -0.63    0.01
   1   0  -3   -0.04    0.00
  -1   0   3   -0.04    0.00
  -1   0   3   -0.04    0.00
  -1   0  -3    0.08    0.01
  -2   0  -3    0.04    0.01
  -3   0  -3   -0.02    0.02
  -3   0  -3   -0.01    0.02
  -3   0  -3   -0.03    0.01
   3   0   3    0.03    0.02
  -4   0  -3    0.02    0.02
  -4   0  -3    0.03    0.02
   4   0   3    0.02    0.03
   4   0   3    0.00    0.02
  -5   0  -3   -0.04    0.06
  -5   0  -3    0.04    0.03
   5   0   3    0.02    0.02
   5   0   3   -0.03    0.04
  -6   0  -3    0.07    0.06
  -6   0  -3    0.01    0.02
   6   0   3   -0.01    0.03
   6   0   3    0.01    0.03
   6   0   3    0.01    0.03
  -7   0  -3    0.02    0.03
  -7   0  -3    0.05    0.02
  -7   0  -3    0.02    0.02
   7   0   3    0.02    0.02
  -8   0  -3    0.00    0.02
  -8   0  -3   -0.03    0.02
  -8   0  -3   -0.01    0.02
   8   0   3    0.00    0.01
   9  -1  -3    0.91    0.04
  -9   1   3    0.94    0.04
  -9   1   3    0.92    0.04
  -9   1   3    0.96    0.04
  -8   1   3    5.82    0.22
  -8   1   3    6.12    0.19
  -8   1   3    6.00    0.20
   7  -1  -3    5.85    0.22
  -7   1   3    5.89    0.20
  -7   1   3    5.58    0.18
  -7   1   3    5.85    0.21
  -7   1   3    5.62    0.24
  -7   1   3    5.82    0.19
  -7   1   3    5.80    0.20
  -7   1   3    5.58    0.22
   6  -1  -3    0.85    0.06
  -6   1   3    0.90    0.06
  -6   1   3    0.85    0.06
  -6   1   3    0.82    0.06
   5  -1  -3    6.81    0.25
  -5   1   3    6.84    0.25
  -5   1   3    6.53    0.26
   4  -1  -3   22.43    0.77
  -4   1   3   22.84    0.77
  -4   1   3   21.78    0.83
  -4   1   3   22.55    0.83
   3  -1  -3    0.25    0.02
  -3   1   3    0.28    0.02
  -3   1   3    0.24    0.02
  -2   1   3 1000.00   36.56
   1  -1  -3    0.41    0.02
   1  -1  -3    0.42    0.02
  -1   1   3    0.41    0.02
  -1   1   3    0.42    0.02
  -1   1   3    0.42    0.02
   0  -1  -3   24.68    0.90
   0  -1  -3   24.06    0.89
   0   1   3   23.73    0.89
   0   1   3   24.04    0.89
   0   1   3   24.44    0.89
  -1  -1  -3    0.68    0.03
   1   1   3    0.66    0.03
  -2  -1  -3   18.34    0.68
   2   1   3   18.90    0.69
  -3  -1  -3   48.97    1.78
  -3  -1  -3   47.97    1.64
  -3  -1  -3   48.72    1.76
   3   1   3   46.94    1.63
  -4  -1  -3    0.19    0.03
  -4  -1  -3    0.29    0.03
   4   1   3    0.25    0.03
   4   1   3    0.20    0.03
  -5  -1  -3    4.35    0.19
  -5  -1  -3    4.90    0.18
   5   1   3    4.83    0.17
   5   1   3    4.65    0.17
  -6  -1  -3    3.27    0.15
  -6  -1  -3    3.38    0.12
   6   1   3    3.13    0.13
  -7  -1  -3    0.14    0.03
  -7  -1  -3    0.17    0.03
  -7  -1  -3    0.17    0.03
   7   1   3    0.15    0.03
  -8  -1  -3    0.46    0.04
  -8  -1  -3    0.47    0.04
   8   1   3    0.45    0.03
   9  -2  -3    0.11    0.02
  -9   2   3    0.12    0.02
  -9   2   3    0.10    0.01
  -9   2   3    0.11    0.02
  -8   2   3    0.49    0.04
  -8   2   3    0.53    0.05
  -8   2   3    0.55    0.04
   7  -2  -3    7.61    0.28
  -7   2   3    7.41    0.25
  -7   2   3    7.71    0.25
  -7   2   3    7.38    0.28
  -7   2   3    7.98    0.24
  -7   2   3    7.43    0.30
  -7   2   3    7.23    0.23
  -7   2   3    7.47    0.25
   6  -2  -3    2.24    0.10
  -6   2   3    2.15    0.10
  -6   2   3    2.19    0.09
  -6   2   3    2.22    0.11
  -6   2   3    2.27    0.09
   5  -2  -3    2.37    0.10
  -5   2   3    2.43    0.11
  -5   2   3    2.49    0.10
   4  -2  -3    0.46    0.04
  -4   2   3    0.45    0.04
  -4   2   3    0.42    0.03
  -4   2   3    0.43    0.05
   3  -2  -3    0.04    0.01
   3  -2  -3    0.03    0.01
  -3   2   3    0.03    0.01
  -3   2   3    0.06    0.02
  -3   2   3    0.03    0.01
  -3   2   3    0.03    0.01
   2  -2  -3   64.88    2.45
   2  -2  -3   67.60    2.45
  -2   2   3   66.24    2.45
  -2   2   3   65.37    2.45
  -2   2   3   68.25    2.45
   1  -2  -3    6.73    0.24
   1  -2  -3    6.59    0.24
  -1   2   3    6.65    0.24
  -1   2   3    6.34    0.24
   0  -2  -3  136.24    5.11
   0   2   3  135.81    5.09
   0   2   3  139.82    5.12
   0   2   3  144.18    5.12
  -1  -2  -3    0.09    0.01
   1   2   3    0.05    0.01
   2   2   3    0.09    0.01
  -3  -2  -3    9.48    0.34
  -3  -2  -3    9.89    0.36
   3   2   3    9.84    0.34
  -4  -2  -3   10.01    0.35
  -4  -2  -3    9.58    0.37
   4   2   3    9.60    0.37
   4   2   3    9.67    0.34
  -5  -2  -3    0.03    0.06
  -5  -2  -3    0.18    0.03
   5   2   3    0.11    0.02
  -6  -2  -3    0.16    0.03
   6   2   3    0.19    0.03
   6   2   3    0.09    0.03
  -7  -2  -3    1.33    0.07
  -7  -2  -3    1.35    0.07
   7   2   3    1.40    0.06
   7   2   3    1.38    0.08
  -8  -2  -3    0.17    0.02
  -8  -2  -3    0.16    0.02
  -8  -2  -3    0.24    0.03
   8   2   3    0.21    0.02
   9  -3  -3    2.10    0.07
  -9   3   3    2.17    0.08
  -9   3   3    2.15    0.07
  -9   3   3    2.14    0.08
  -8   3   3    2.37    0.10
  -8   3   3    2.39    0.09
  -8   3   3    2.41    0.09
   7  -3  -3    7.74    0.28
  -7   3   3    7.49    0.31
  -7   3   3    7.63    0.23
  -7   3   3    8.07    0.25
  -7   3   3    8.05    0.26
  -7   3   3    7.51    0.26
   6  -3  -3    0.36    0.05
  -6   3   3    0.41    0.04
  -6   3   3    0.41    0.05
  -6   3   3    0.38    0.04
  -6   3   3    0.37    0.05
  -6   3   3    0.36    0.04
   5  -3  -3    0.06    0.03
  -5   3   3    0.11    0.02
  -5   3   3    0.04    0.02
   4  -3  -3   15.98    0.61
  -4   3   3   16.43    0.57
  -4   3   3   16.48    0.61
   3  -3  -3    1.69    0.07
   3  -3  -3    1.67    0.07
  -3   3   3    1.68    0.07
  -3   3   3    1.61    0.07
  -3   3   3    1.70    0.07
   2  -3  -3   30.84    1.11
   2  -3  -3   30.11    1.11
  -2   3   3   29.37    1.11
  -2   3   3   30.63    1.11
   1  -3  -3    1.37    0.05
   1  -3  -3    1.37    0.05
  -1   3   3    1.37    0.05
  -1   3   3    1.33    0.05
   0  -3  -3   20.44    0.74
   0  -3  -3   19.87    0.73
   0   3   3   19.12    0.73
   0   3   3   20.26    0.73
   0   3   3   20.06    0.74
  -1  -3  -3    9.10    0.35
   1   3   3    9.32    0.35
   1   3   3    9.44    0.35
  -2  -3  -3    9.89    0.37
  -3  -3  -3   30.19    1.03
  -3  -3  -3   29.86    1.10
   3   3   3   29.65    1.02
  -4  -3  -3   12.73    0.44
  -4  -3  -3   11.92    0.46
   4   3   3   12.30    0.43
   4   3   3   12.57    0.47
  -5  -3  -3    1.04    0.06
  -5  -3  -3    0.95    0.11
   5   3   3    1.06    0.07
   5   3   3    1.01    0.06
   5   3   3    1.04    0.06
  -6  -3  -3    0.24    0.04
   6   3   3    0.38    0.04
  -7  -3  -3    1.04    0.06
  -7  -3  -3    1.07    0.07
   7   3   3    1.13    0.05
   7   3   3    1.06    0.07
  -8  -3  -3    2.75    0.10
  -8  -3  -3    2.78    0.10
  -8  -3  -3    2.74    0.10
   8   3   3    2.74    0.09
   9  -4  -3    2.66    0.09
  -9   4   3    2.68    0.09
  -9   4   3    2.74    0.09
  -9   4   3    2.68    0.09
  -8   4   3    1.19    0.07
  -8   4   3    1.14    0.06
  -8   4   3    1.23    0.05
  -8   4   3    1.13    0.06
  -7   4   3    0.56    0.07
  -7   4   3    0.60    0.04
  -7   4   3    0.55    0.05
  -7   4   3    0.46    0.05
  -7   4   3    0.54    0.05
   6  -4  -3    0.74    0.06
  -6   4   3    0.80    0.05
  -6   4   3    0.71    0.06
  -6   4   3    0.74    0.06
  -6   4   3    0.73    0.05
   5  -4  -3    0.08    0.03
  -5   4   3    0.08    0.04
  -5   4   3    0.05    0.02
  -5   4   3    0.10    0.03
  -5   4   3    0.06    0.02
  -5   4   3    0.09    0.03
   4  -4  -3    0.42    0.03
  -4   4   3    0.38    0.03
  -4   4   3    0.36    0.03
   3  -4  -3    2.17    0.08
  -3   4   3    2.10    0.08
  -3   4   3    2.15    0.08
  -3   4   3    2.03    0.09
  -3   4   3    2.13    0.08
  -2   4   3    0.60    0.03
  -2   4   3    0.65    0.03
  -1   4   3   40.85    1.57
  -1   4   3   43.31    1.57
  -1   4   3   44.28    1.57
   0  -4  -3   18.62    0.66
   0  -4  -3   18.62    0.66
   0   4   3   16.61    0.66
   0   4   3   17.73    0.66
  -1  -4  -3    5.99    0.23
   1   4   3    6.03    0.23
   1   4   3    6.40    0.23
  -2  -4  -3    1.72    0.07
  -2  -4  -3    1.81    0.08
  -3  -4  -3    2.11    0.09
   3   4   3    1.99    0.08
  -4  -4  -3    1.86    0.09
  -4  -4  -3    1.94    0.09
   4   4   3    1.85    0.09
   4   4   3    1.80    0.08
  -5  -4  -3    0.74    0.08
  -5  -4  -3    0.70    0.05
   5   4   3    0.71    0.05
   5   4   3    0.74    0.05
  -6  -4  -3    0.34    0.05
  -6  -4  -3    0.32    0.05
   6   4   3    0.43    0.04
  -7  -4  -3    1.62    0.07
  -7  -4  -3    1.60    0.08
   7   4   3    1.66    0.07
   7   4   3    1.59    0.08
  -8  -4  -3    5.81    0.18
  -8  -4  -3    5.68    0.19
   8   4   3    5.69    0.17
   9  -5  -3    2.55    0.08
  -9   5   3    2.60    0.09
  -9   5   3    2.54    0.08
  -9   5   3    2.45    0.09
  -8   5   3    0.07    0.02
  -8   5   3    0.10    0.03
  -8   5   3    0.08    0.02
  -7   5   3    0.64    0.07
  -7   5   3    0.54    0.04
  -7   5   3    0.53    0.05
  -7   5   3    0.61    0.05
  -7   5   3    0.60    0.05
   6  -5  -3    4.94    0.19
  -6   5   3    4.96    0.17
  -6   5   3    5.06    0.19
  -6   5   3    5.01    0.16
  -6   5   3    4.91    0.16
  -6   5   3    5.07    0.21
  -6   5   3    5.14    0.18
   5  -5  -3    0.41    0.05
  -5   5   3    0.32    0.03
  -5   5   3    0.41    0.05
  -5   5   3    0.32    0.03
   4  -5  -3    1.05    0.06
  -4   5   3    0.95    0.05
  -4   5   3    0.91    0.05
   3  -5  -3   26.27    0.95
   3  -5  -3   25.33    0.95
  -3   5   3   25.90    0.96
  -3   5   3   26.00    0.89
  -2   5   3   14.88    0.59
  -2   5   3   16.40    0.59
  -2   5   3   16.92    0.59
  -1   5   3    0.66    0.03
   0  -5  -3    4.03    0.15
   0   5   3    4.03    0.15
   0   5   3    3.83    0.15
   0   5   3    3.72    0.15
  -1  -5  -3    1.37    0.06
   1   5   3    1.30    0.06
   1   5   3    1.34    0.06
  -2  -5  -3   38.91    1.40
   2   5   3   36.72    1.40
  -3  -5  -3   17.49    0.61
   3   5   3   17.74    0.60
  -4  -5  -3    1.17    0.06
  -5  -5  -3    0.16    0.05
  -5  -5  -3    0.31    0.07
  -5  -5  -3    0.31    0.04
  -6  -5  -3    2.01    0.10
   6   5   3    1.80    0.08
   6   5   3    1.89    0.09
  -7  -5  -3    0.05    0.03
  -7  -5  -3    0.02    0.02
   7   5   3    0.03    0.02
  -8  -5  -3    6.61    0.22
  -8  -5  -3    6.89    0.22
  -8  -5  -3    7.20    0.22
   8   5   3    6.85    0.21
   9  -6  -3    0.42    0.03
  -9   6   3    0.43    0.03
  -9   6   3    0.41    0.02
  -9   6   3    0.42    0.03
  -8   6   3    0.35    0.03
  -8   6   3    0.35    0.03
  -8   6   3    0.31    0.04
  -7   6   3    0.01    0.02
  -7   6   3    0.03    0.02
  -7   6   3    0.00    0.02
  -7   6   3    0.07    0.04
   6  -6  -3   13.71    0.50
  -6   6   3   14.06    0.41
  -6   6   3   14.78    0.42
  -6   6   3   14.53    0.50
  -6   6   3   14.07    0.54
  -6   6   3   14.05    0.45
   5  -6  -3   19.33    0.68
  -5   6   3   19.82    0.74
  -5   6   3   19.79    0.57
  -5   6   3   19.72    0.68
  -4   6   3   18.07    0.61
  -4   6   3   17.63    0.65
  -4   6   3   16.77    0.65
  -3   6   3    5.53    0.21
  -3   6   3    5.22    0.19
  -3   6   3    5.23    0.20
  -2   6   3    9.88    0.37
  -1   6   3    0.62    0.03
   0  -6  -3   59.31    2.15
   0   6   3   58.33    2.14
   0   6   3   56.54    2.14
   0   6   3   57.96    2.14
  -1  -6  -3    0.27    0.02
   1   6   3    0.34    0.02
  -2  -6  -3   17.39    0.61
  -2  -6  -3   15.98    0.56
   2   6   3   15.22    0.61
   2   6   3   16.14    0.56
  -3  -6  -3    5.64    0.20
   3   6   3    5.40    0.20
   4   6   3    0.33    0.03
  -5  -6  -3   17.84    0.62
  -5  -6  -3   17.82    0.54
   5   6   3   17.42    0.61
   5   6   3   17.29    0.52
  -6  -6  -3    0.64    0.06
   6   6   3    0.55    0.05
   6   6   3    0.63    0.05
  -7  -6  -3    0.67    0.05
  -7  -6  -3    0.63    0.05
  -7  -6  -3    0.66    0.05
   7   6   3    0.69    0.05
   7   6   3    0.71    0.04
  -8  -6  -3    1.44    0.06
  -8  -6  -3    1.47    0.06
  -8  -6  -3    1.37    0.06
   8   6   3    1.49    0.05
   9  -7  -3    0.79    0.04
  -9   7   3    0.78    0.04
  -9   7   3    0.86    0.03
  -9   7   3    0.83    0.04
  -8   7   3    0.39    0.04
  -8   7   3    0.26    0.03
  -7   7   3    6.48    0.21
  -7   7   3    6.55    0.21
  -7   7   3    6.23    0.20
  -7   7   3    6.18    0.26
   6  -7  -3    1.29    0.08
  -6   7   3    1.45    0.07
  -6   7   3    1.48    0.08
  -6   7   3    1.44    0.07
   5  -7  -3    0.51    0.06
  -5   7   3    0.53    0.05
  -5   7   3    0.48    0.04
  -5   7   3    0.55    0.06
  -5   7   3    0.55    0.04
  -4   7   3    0.64    0.04
  -4   7   3    0.64    0.04
  -4   7   3    0.57    0.03
  -3   7   3    6.66    0.24
  -3   7   3    6.64    0.25
  -2   7   3   15.39    0.54
  -2   7   3   16.30    0.59
  -1   7   3    0.81    0.03
  -1   7   3    0.79    0.04
  -1   7   3    0.82    0.03
   0  -7  -3   96.76    3.55
   0   7   3   99.62    3.55
   0   7   3   94.96    3.54
   0   7   3   93.50    3.55
  -1  -7  -3    4.40    0.15
   1   7   3    3.43    0.15
   1   7   3    4.03    0.14
  -2  -7  -3   21.22    0.73
   2   7   3   21.36    0.79
   2   7   3   20.63    0.72
  -3  -7  -3    3.25    0.13
   3   7   3    3.21    0.12
  -4  -7  -3    6.42    0.25
   4   7   3    6.84    0.24
  -5  -7  -3    2.25    0.11
  -5  -7  -3    2.54    0.11
   5   7   3    2.41    0.10
  -6  -7  -3    2.99    0.14
  -6  -7  -3    3.26    0.12
   6   7   3    3.26    0.11
   6   7   3    3.13    0.13
  -7  -7  -3    1.46    0.07
  -7  -7  -3    1.51    0.08
  -7  -7  -3    1.45    0.07
   7   7   3    1.45    0.07
   7   7   3    1.47    0.06
  -8  -7  -3    2.65    0.09
  -8  -7  -3    2.59    0.10
   8   7   3    2.64    0.09
   9  -8  -3    0.17    0.02
  -9   8   3    0.24    0.02
  -9   8   3    0.21    0.02
  -8   8   3    0.13    0.02
  -7   8   3    0.24    0.05
  -7   8   3    0.29    0.04
  -7   8   3    0.28    0.03
  -7   8   3    0.36    0.04
  -7   8   3    0.30    0.04
  -6   8   3    2.17    0.09
  -6   8   3    2.47    0.10
  -6   8   3    2.23    0.10
  -6   8   3    2.40    0.11
   5  -8  -3    7.31    0.28
  -5   8   3    7.58    0.24
  -5   8   3    7.88    0.23
  -5   8   3    7.87    0.28
  -5   8   3    7.60    0.30
  -4   8   3    1.50    0.07
  -4   8   3    1.35    0.06
  -3   8   3    2.84    0.11
  -3   8   3    2.71    0.11
  -2   8   3   15.28    0.57
  -1   8   3   20.91    0.80
  -1   8   3   22.20    0.80
  -1   8   3   21.91    0.80
   0  -8  -3   14.07    0.53
   0  -8  -3   14.67    0.53
   0   8   3   14.56    0.53
   0   8   3   14.45    0.53
   0   8   3   13.74    0.53
  -1  -8  -3    4.50    0.17
  -1  -8  -3    4.63    0.18
   1   8   3    4.76    0.17
   1   8   3    4.68    0.18
  -2  -8  -3   66.18    2.24
  -2  -8  -3   67.11    2.43
   2   8   3   64.07    2.43
   2   8   3   65.95    2.23
  -3  -8  -3   17.76    0.59
   3   8   3   16.25    0.58
  -4  -8  -3    0.20    0.03
   4   8   3    0.19    0.03
  -5  -8  -3    8.40    0.27
  -5  -8  -3    8.26    0.31
   5   8   3    8.18    0.30
   5   8   3    8.18    0.25
  -6  -8  -3    3.71    0.13
  -6  -8  -3    3.41    0.15
   6   8   3    3.30    0.14
   6   8   3    3.55    0.12
  -7  -8  -3   13.65    0.41
  -7  -8  -3   13.45    0.42
  -7  -8  -3   13.59    0.48
   7   8   3   13.37    0.40
  -8  -8  -3    0.82    0.04
  -8  -8  -3    0.86    0.04
  -8  -8  -3    0.82    0.04
   8   8   3    0.86    0.04
  -8   9   3    0.48    0.03
  -8   9   3    0.50    0.03
  -8   9   3    0.46    0.04
  -7   9   3    0.14    0.03
  -7   9   3    0.07    0.02
  -7   9   3    0.11    0.02
  -7   9   3    0.09    0.02
  -7   9   3    0.13    0.05
  -7   9   3    0.09    0.02
  -6   9   3    0.26    0.04
  -6   9   3    0.28    0.04
  -6   9   3    0.22    0.03
  -6   9   3    0.22    0.03
   5  -9  -3    2.27    0.11
  -5   9   3    2.33    0.10
  -5   9   3    2.13    0.09
  -5   9   3    2.09    0.09
  -5   9   3    2.29    0.09
  -4   9   3    0.40    0.03
  -4   9   3    0.45    0.03
  -3   9   3    0.06    0.02
  -3   9   3    0.00    0.01
  -2   9   3    0.71    0.04
  -2   9   3    0.72    0.04
  -1   9   3    0.90    0.04
  -1   9   3    0.93    0.04
   0  -9  -3   34.77    1.28
   0  -9  -3   35.41    1.28
   0   9   3   34.18    1.28
   0   9   3   35.36    1.28
   0   9   3   35.20    1.28
   0   9   3   33.74    1.14
  -1  -9  -3   23.21    0.86
  -1  -9  -3   23.35    0.80
   1   9   3   22.88    0.79
   1   9   3   23.50    0.86
  -2  -9  -3    2.82    0.11
   2   9   3    2.67    0.10
   2   9   3    2.86    0.13
  -3  -9  -3    0.29    0.03
   3   9   3    0.28    0.03
  -4  -9  -3    3.47    0.14
   4   9   3    3.65    0.14
  -5  -9  -3    0.05    0.04
  -5  -9  -3    0.03    0.03
   5   9   3    0.06    0.02
  -6  -9  -3    0.92    0.07
  -6  -9  -3    0.98    0.07
  -7  -9  -3   14.71    0.45
  -7  -9  -3   14.80    0.46
   7   9   3   14.63    0.43
  -8  -9  -3    0.67    0.04
   8   9   3    0.69    0.03
  -8  10   3    1.38    0.06
  -8  10   3    1.43    0.06
  -8  10   3    1.38    0.06
  -8  10   3    1.41    0.06
  -7  10   3    0.67    0.04
  -7  10   3    0.62    0.05
  -7  10   3    0.64    0.04
  -7  10   3    0.57    0.08
  -7  10   3    0.63    0.04
  -6  10   3    0.37    0.04
  -6  10   3    0.39    0.04
  -6  10   3    0.41    0.04
  -6  10   3    0.41    0.05
  -6  10   3    0.43    0.04
  -5  10   3    0.51    0.04
  -5  10   3    0.54    0.04
  -5  10   3    0.45    0.05
  -5  10   3    0.47    0.05
  -4  10   3    4.94    0.19
  -4  10   3    4.48    0.17
  -3  10   3    7.61    0.29
  -2  10   3    1.74    0.07
  -2  10   3    1.82    0.08
  -1  10   3   13.77    0.52
  -1  10   3   13.94    0.52
  -1  10   3   13.41    0.47
  -1  10   3   14.89    0.49
   0 -10  -3    4.90    0.18
   0 -10  -3    4.82    0.18
   0  10   3    4.45    0.17
   0  10   3    4.84    0.18
   0  10   3    4.88    0.18
  -1 -10  -3   26.08    0.89
  -1 -10  -3   26.46    0.97
   1  10   3   26.55    0.97
   1  10   3   25.30    0.89
  -2 -10  -3    0.11    0.02
   2  10   3    0.12    0.02
   2  10   3    0.10    0.04
  -3 -10  -3   -0.03    0.03
  -3 -10  -3    0.01    0.02
   3  10   3   -0.02    0.01
  -4 -10  -3    0.34    0.04
   4  10   3    0.26    0.04
   4  10   3    0.30    0.03
  -5 -10  -3    1.54    0.08
  -5 -10  -3    1.51    0.08
   5  10   3    1.53    0.07
   5  10   3    1.47    0.07
  -6 -10  -3    0.07    0.03
  -6 -10  -3    0.09    0.03
  -6 -10  -3   -0.03    0.03
   6  10   3    0.03    0.03
  -7 -10  -3   16.47    0.50
  -7 -10  -3   15.94    0.49
  -7 -10  -3   15.95    0.58
   7  10   3   16.70    0.57
  -8 -10  -3    0.90    0.04
   8  10   3    0.75    0.04
  -8  11   3    0.29    0.03
  -8  11   3    0.26    0.03
  -8  11   3    0.22    0.03
  -8  11   3    0.23    0.03
  -7  11   3    0.04    0.02
  -7  11   3    0.03    0.05
  -7  11   3    0.00    0.02
  -7  11   3    0.02    0.02
  -6  11   3    5.62    0.23
  -6  11   3    5.66    0.19
  -6  11   3    5.89    0.18
  -5  11   3    0.34    0.04
  -5  11   3    0.35    0.04
  -5  11   3    0.43    0.04
  -5  11   3    0.40    0.04
  -5  11   3    0.39    0.04
  -4  11   3    1.64    0.08
  -3  11   3    3.31    0.13
  -2  11   3    0.21    0.02
  -2  11   3    0.23    0.03
  -1  11   3   46.16    1.51
  -1  11   3   45.69    1.57
  -1  11   3   47.43    1.69
  -1  11   3   45.23    1.70
   0 -11  -3    6.64    0.24
   0 -11  -3    6.40    0.24
   0  11   3    6.59    0.24
   0  11   3    6.52    0.24
   0  11   3    6.26    0.22
   0  11   3    6.14    0.23
  -1 -11  -3   45.31    1.63
  -1 -11  -3   44.78    1.50
   1  11   3   42.79    1.49
   1  11   3   43.23    1.63
  -2 -11  -3   32.67    1.07
   2  11   3   30.68    1.06
   2  11   3   30.35    1.17
  -3 -11  -3    0.01    0.03
   3  11   3    0.03    0.02
  -4 -11  -3    0.45    0.05
   4  11   3    0.46    0.06
   4  11   3    0.39    0.04
  -5 -11  -3    1.01    0.07
  -5 -11  -3    0.99    0.07
   5  11   3    0.96    0.06
   5  11   3    1.05    0.06
   5  11   3    0.76    0.06
  -6 -11  -3   17.90    0.56
  -6 -11  -3   18.52    0.65
  -6 -11  -3   18.51    0.56
   6  11   3   17.33    0.53
   6  11   3   18.75    0.57
   6  11   3   18.71    0.64
  -7 -11  -3   12.90    0.47
  -7 -11  -3   12.68    0.41
  -7 -11  -3   13.68    0.40
   7  11   3   13.67    0.39
  -8 -11  -3    0.00    0.01
   8  11   3    0.02    0.01
   8 -12  -3    0.08    0.02
  -8  12   3    0.08    0.01
  -8  12   3    0.07    0.02
  -8  12   3    0.08    0.02
  -8  12   3    0.07    0.01
  -7  12   3    0.03    0.02
  -7  12   3    0.02    0.02
  -7  12   3    0.08    0.02
  -7  12   3    0.05    0.02
  -6  12   3    1.43    0.08
  -6  12   3    1.57    0.07
  -6  12   3    1.52    0.07
  -6  12   3    1.58    0.07
  -5  12   3   11.11    0.33
  -5  12   3   10.72    0.35
  -5  12   3   11.43    0.42
  -5  12   3   10.57    0.32
  -5  12   3   10.86    0.35
  -5  12   3   10.59    0.36
  -4  12   3   10.79    0.33
  -4  12   3   10.96    0.41
  -3  12   3    0.57    0.04
  -2  12   3    1.01    0.05
  -2  12   3    0.94    0.05
  -1  12   3   14.89    0.48
  -1  12   3   13.40    0.49
  -1  12   3   14.40    0.53
  -1  12   3   14.19    0.53
   0 -12  -3    3.99    0.15
   0 -12  -3    3.79    0.15
   0  12   3    3.83    0.14
   0  12   3    3.88    0.15
   0  12   3    3.76    0.14
   0  12   3    3.98    0.15
  -1 -12  -3   41.95    1.38
   1  12   3   40.97    1.38
   1  12   3   38.47    1.50
  -2 -12  -3   23.53    0.89
  -2 -12  -3   25.02    0.82
   2  12   3   22.60    0.81
  -3 -12  -3    2.52    0.13
  -3 -12  -3    2.65    0.11
   3  12   3    2.69    0.10
  -4 -12  -3    0.03    0.03
  -4 -12  -3    0.04    0.04
   4  12   3    0.03    0.04
   4  12   3    0.06    0.02
  -5 -12  -3    0.64    0.06
   5  12   3    0.76    0.05
   5  12   3    0.71    0.05
   5  12   3    0.73    0.06
  -6 -12  -3    8.98    0.33
  -6 -12  -3    8.95    0.28
  -6 -12  -3    8.56    0.28
   6  12   3    8.64    0.32
   6  12   3    8.81    0.27
   6  12   3    8.87    0.28
  -7 -12  -3    0.73    0.04
  -7 -12  -3    0.76    0.05
  -7 -12  -3    0.63    0.06
   7  12   3    0.70    0.04
  -8 -12  -3    3.34    0.11
  -8 -12  -3    3.56    0.11
  -8  13   3    2.69    0.09
  -8  13   3    2.66    0.09
  -8  13   3    2.74    0.09
  -7  13   3    0.18    0.02
  -7  13   3    0.18    0.02
  -7  13   3    0.18    0.02
  -7  13   3    0.17    0.02
  -6  13   3   11.00    0.32
  -6  13   3   10.76    0.42
  -6  13   3   11.14    0.35
  -6  13   3   11.01    0.35
  -6  13   3   10.87    0.33
  -5  13   3    1.68    0.09
  -5  13   3    1.73    0.09
  -5  13   3    1.72    0.07
  -5  13   3    1.64    0.08
  -5  13   3    1.62    0.07
  -4  13   3    4.26    0.17
  -4  13   3    4.01    0.16
  -4  13   3    4.21    0.15
  -3  13   3    0.14    0.02
  -2  13   3    1.57    0.07
  -1  13   3    4.94    0.19
  -1  13   3    4.81    0.18
  -1  13   3    4.78    0.18
   0 -13  -3    2.19    0.09
   0  13   3    2.29    0.09
   0  13   3    2.33    0.09
   0  13   3    2.23    0.10
  -1 -13  -3    0.84    0.04
   1  13   3    0.77    0.04
  -2 -13  -3    0.99    0.07
  -2 -13  -3    1.03    0.05
   2  13   3    0.99    0.05
  -3 -13  -3    0.29    0.05
  -3 -13  -3    0.29    0.04
   3  13   3    0.32    0.03
   3  13   3    0.33    0.05
  -4 -13  -3    2.70    0.12
  -4 -13  -3    2.83    0.11
   4  13   3    2.71    0.11
   4  13   3    2.53    0.11
  -5 -13  -3    0.35    0.05
   5  13   3    0.36    0.04
   5  13   3    0.38    0.05
  -6 -13  -3   12.96    0.40
  -6 -13  -3   12.88    0.47
  -6 -13  -3   13.06    0.40
   6  13   3   12.66    0.45
   6  13   3   12.84    0.41
  -7 -13  -3    0.08    0.02
  -7 -13  -3    0.10    0.02
  -7 -13  -3    0.11    0.03
   7  13   3    0.14    0.02
  -7  14   3    0.75    0.04
  -7  14   3    0.72    0.04
  -7  14   3    0.84    0.04
  -6  14   3    0.18    0.04
  -6  14   3    0.19    0.03
  -6  14   3    0.11    0.02
  -6  14   3    0.15    0.02
  -6  14   3    0.17    0.03
  -5  14   3    0.31    0.04
  -5  14   3    0.34    0.04
  -5  14   3    0.25    0.04
  -5  14   3    0.25    0.04
  -5  14   3    0.32    0.05
  -4  14   3    0.04    0.02
  -4  14   3    0.13    0.06
  -4  14   3   -0.02    0.04
  -4  14   3    0.04    0.03
  -4  14   3    0.03    0.02
  -4  14   3    0.03    0.04
  -3  14   3    1.56    0.07
  -1  14   3    2.27    0.10
  -1  14   3    2.16    0.09
   0  14   3    6.79    0.24
   0  14   3    6.82    0.24
  -1 -14  -3    7.08    0.26
  -1 -14  -3    6.64    0.23
   1  14   3    5.61    0.23
  -2 -14  -3    3.20    0.15
   2  14   3    3.14    0.12
  -3 -14  -3    1.17    0.07
   3  14   3    1.25    0.06
  -4 -14  -3    0.06    0.03
  -4 -14  -3    0.11    0.04
   4  14   3    0.07    0.02
  -5 -14  -3    0.05    0.03
  -5 -14  -3    0.02    0.03
   5  14   3    0.07    0.03
   5  14   3    0.04    0.02
   5  14   3    0.03    0.03
  -6 -14  -3   12.52    0.44
  -6 -14  -3   12.07    0.38
   6  14   3   12.30    0.38
   6  14   3   11.70    0.36
  -7 -14  -3    0.39    0.04
  -7 -14  -3    0.36    0.03
  -7 -14  -3    0.37    0.05
   7  14   3    0.40    0.03
  -8  15   3    0.45    0.03
  -8  15   3    0.40    0.02
  -8  15   3    0.41    0.03
  -7  15   3    0.82    0.04
  -7  15   3    1.01    0.05
  -7  15   3    0.94    0.04
  -6  15   3    5.02    0.17
  -6  15   3    4.82    0.21
  -6  15   3    4.86    0.17
  -6  15   3    5.10    0.16
  -6  15   3    4.89    0.18
  -6  15   3    4.90    0.16
  -5  15   3    0.18    0.03
  -5  15   3    0.22    0.04
  -5  15   3    0.26    0.04
  -5  15   3    0.21    0.03
  -5  15   3    0.18    0.03
  -5  15   3    0.20    0.03
  -4  15   3    3.78    0.16
  -4  15   3    3.78    0.16
  -4  15   3    3.90    0.14
  -4  15   3    3.83    0.14
  -4  15   3    3.85    0.13
  -3  15   3    2.32    0.09
  -3  15   3    1.75    0.09
  -2  15   3    7.98    0.31
  -1  15   3    0.32    0.03
  -1  15   3    0.25    0.03
  -1  15   3    0.31    0.05
  -1  15   3    0.29    0.04
   0  15   3    1.10    0.06
   0  15   3    1.13    0.06
   0  15   3    1.19    0.06
  -1 -15  -3    2.22    0.09
   1  15   3    2.21    0.09
  -2 -15  -3   21.97    0.74
   2  15   3   20.42    0.73
  -3 -15  -3    0.38    0.05
  -3 -15  -3    0.49    0.05
   3  15   3    0.34    0.04
   3  15   3    0.47    0.07
  -4 -15  -3    0.02    0.03
   4  15   3    0.05    0.02
   4  15   3    0.06    0.03
  -5 -15  -3    1.62    0.09
  -5 -15  -3    1.55    0.08
   5  15   3    1.59    0.08
   5  15   3    1.64    0.08
  -6 -15  -3   13.51    0.41
  -6 -15  -3   13.01    0.48
  -6 -15  -3   13.16    0.41
   6  15   3   13.74    0.42
  -7 -15  -3    4.89    0.16
   7  15   3    5.18    0.17
  -8  16   3    0.79    0.04
   7 -16  -3    0.64    0.05
  -7  16   3    0.67    0.04
  -7  16   3    0.67    0.04
  -7  16   3    0.66    0.04
  -6  16   3    7.46    0.32
  -6  16   3    8.36    0.25
  -6  16   3    7.97    0.27
  -6  16   3    8.57    0.26
  -6  16   3    8.53    0.24
  -5  16   3    2.77    0.13
  -5  16   3    2.91    0.11
  -5  16   3    3.13    0.11
  -5  16   3    3.02    0.11
  -5  16   3    2.95    0.12
  -5  16   3    2.99    0.10
  -4  16   3    4.45    0.15
  -4  16   3    4.22    0.15
  -4  16   3    4.31    0.17
  -4  16   3    4.26    0.18
  -4  16   3    4.34    0.16
  -3  16   3    0.87    0.06
  -3  16   3    0.98    0.07
  -3  16   3    0.96    0.05
  -3  16   3    0.85    0.08
  -2  16   3    0.81    0.06
  -2  16   3    0.72    0.04
  -1  16   3    0.44    0.04
   0  16   3    5.07    0.19
   0  16   3    5.09    0.20
  -1 -16  -3    0.82    0.05
   1  16   3    0.69    0.05
  -2 -16  -3    2.92    0.12
   2  16   3    2.81    0.11
   2  16   3    2.94    0.14
  -3 -16  -3   15.89    0.49
  -3 -16  -3   16.20    0.56
   3  16   3   15.36    0.55
   4  16   3    0.82    0.05
  -6 -16  -3    1.09    0.06
  -6 -16  -3    1.10    0.08
   6  16   3    1.24    0.06
  -7 -16  -3    0.38    0.04
   7  16   3    0.40    0.03
  -7  17   3    0.00    0.01
  -7  17   3    0.02    0.01
  -7  17   3    0.00    0.01
  -7  17   3    0.01    0.02
  -6  17   3    1.08    0.05
  -6  17   3    0.98    0.05
  -6  17   3    1.10    0.05
  -6  17   3    1.12    0.05
  -6  17   3    0.92    0.08
  -6  17   3    1.05    0.06
  -5  17   3    0.11    0.02
  -5  17   3    0.15    0.04
  -5  17   3    0.13    0.03
  -5  17   3    0.14    0.02
  -5  17   3    0.08    0.03
  -5  17   3    0.16    0.03
  -4  17   3    0.19    0.03
  -4  17   3    0.18    0.03
  -4  17   3    0.15    0.05
  -4  17   3    0.23    0.05
  -4  17   3    0.19    0.04
  -3  17   3    4.09    0.15
  -3  17   3    4.03    0.15
  -3  17   3    4.04    0.13
  -3  17   3    3.88    0.17
  -2  17   3    0.19    0.04
  -2  17   3    0.19    0.04
  -2  17   3    0.20    0.06
  -2  17   3    0.16    0.03
  -1  17   3    1.16    0.08
  -1  17   3    1.38    0.06
  -1  17   3    1.22    0.07
  -1  17   3    1.14    0.08
   0  17   3    0.95    0.06
  -1 -17  -3    0.04    0.02
   1  17   3    0.02    0.02
  -2 -17  -3    0.01    0.02
   2  17   3    0.01    0.02
  -3 -17  -3    0.95    0.07
  -3 -17  -3    1.02    0.07
   3  17   3    0.99    0.06
   3  17   3    0.94    0.09
  -4 -17  -3    1.87    0.10
  -4 -17  -3    1.78    0.09
   4  17   3    1.90    0.09
  -5 -17  -3    3.34    0.14
  -5 -17  -3    3.29    0.16
   5  17   3    4.00    0.14
   5  17   3    4.36    0.15
  -6 -17  -3    0.32    0.04
  -6 -17  -3    0.36    0.05
   6  17   3    0.43    0.04
   7  17   3    0.31    0.03
  -7  18   3    0.21    0.02
  -7  18   3    0.13    0.02
   6 -18  -3    0.24    0.03
  -6  18   3    0.35    0.03
  -6  18   3    0.32    0.03
  -6  18   3    0.35    0.03
  -6  18   3    0.28    0.03
  -5  18   3    0.55    0.04
  -5  18   3    0.54    0.05
  -5  18   3    0.53    0.06
  -5  18   3    0.56    0.04
  -5  18   3    0.58    0.04
  -5  18   3    0.56    0.04
  -4  18   3    8.78    0.27
  -4  18   3    8.51    0.25
  -4  18   3    8.17    0.26
  -4  18   3    8.40    0.27
  -4  18   3    8.76    0.28
  -4  18   3    8.00    0.33
  -3  18   3    2.40    0.10
  -3  18   3    2.32    0.11
  -3  18   3    2.41    0.11
  -2  18   3    3.35    0.13
  -2  18   3    3.69    0.14
  -2  18   3    3.38    0.15
  -2  18   3    3.40    0.13
  -2  18   3    3.37    0.12
  -2  18   3    3.25    0.17
  -1  18   3    0.62    0.07
  -1  18   3    0.66    0.09
   0  18   3    1.13    0.07
   0  18   3    1.06    0.08
  -1 -18  -3    6.71    0.24
   1  18   3    6.45    0.24
   1  18   3    6.27    0.23
  -2 -18  -3    4.40    0.17
   2  18   3    4.21    0.16
  -3 -18  -3    1.04    0.07
  -3 -18  -3    1.01    0.07
   3  18   3    1.16    0.09
   3  18   3    1.12    0.06
   3  18   3    0.99    0.07
  -4 -18  -3    4.08    0.17
   4  18   3    4.13    0.15
   4  18   3    4.18    0.16
  -5 -18  -3   11.26    0.42
  -5 -18  -3   11.75    0.36
   5  18   3   11.32    0.41
   5  18   3   11.89    0.37
  -6 -18  -3    0.22    0.03
  -6 -18  -3    0.20    0.04
   6  18   3    0.20    0.02
  -7 -18  -3    0.57    0.04
   7  18   3    0.61    0.04
  -7  19   3    1.60    0.06
  -7  19   3    1.60    0.06
  -6  19   3    4.05    0.14
  -6  19   3    4.28    0.14
  -6  19   3    4.10    0.13
  -5  19   3    0.31    0.04
  -5  19   3    0.24    0.04
  -5  19   3    0.29    0.03
  -5  19   3    0.30    0.05
  -5  19   3    0.18    0.04
  -5  19   3    0.26    0.03
  -4  19   3    0.24    0.03
  -4  19   3    0.28    0.04
  -4  19   3    0.28    0.05
  -4  19   3    0.38    0.04
  -4  19   3    0.29    0.05
  -3  19   3    0.44    0.04
  -3  19   3    0.50    0.07
  -3  19   3    0.46    0.07
  -3  19   3    0.38    0.05
  -3  19   3    0.38    0.04
  -3  19   3    0.54    0.05
  -2  19   3    6.82    0.27
  -2  19   3    6.49    0.24
  -2  19   3    6.77    0.23
  -1  19   3    1.02    0.06
  -1  19   3    1.03    0.09
  -1  19   3    0.80    0.07
   0  19   3    0.23    0.04
   0  19   3    0.20    0.04
   0  19   3    0.13    0.04
   0  19   3    0.22    0.04
  -1 -19  -3    2.41    0.11
   1  19   3    2.55    0.11
   1  19   3    2.51    0.12
  -2 -19  -3    2.54    0.11
   2  19   3    2.58    0.12
   2  19   3    2.62    0.11
   2  19   3    2.39    0.12
  -3 -19  -3   39.18    1.35
  -4 -19  -3   12.25    0.38
  -4 -19  -3   11.82    0.44
   4  19   3   12.36    0.39
   4  19   3   12.05    0.43
  -5 -19  -3    4.69    0.16
  -5 -19  -3    4.82    0.19
   5  19   3    4.78    0.16
   5  19   3    4.67    0.18
  -6 -19  -3    1.44    0.08
  -6 -19  -3    1.51    0.07
   6  19   3    1.52    0.06
  -7  20   3    1.83    0.07
  -7  20   3    1.86    0.07
   6 -20  -3    1.52    0.08
  -6  20   3    1.56    0.06
  -6  20   3    1.63    0.06
   5 -20  -3    1.81    0.08
  -5  20   3    1.84    0.08
  -5  20   3    1.80    0.07
  -5  20   3    1.90    0.07
  -5  20   3    1.66    0.10
  -5  20   3    1.80    0.07
  -5  20   3    1.73    0.10
  -4  20   3    0.74    0.05
  -4  20   3    0.80    0.05
  -4  20   3    0.71    0.06
  -4  20   3    0.79    0.05
  -4  20   3    0.75    0.07
  -4  20   3    0.88    0.06
  -3  20   3    3.56    0.12
  -3  20   3    3.62    0.15
  -3  20   3    3.65    0.14
  -3  20   3    3.78    0.13
  -3  20   3    3.73    0.14
  -3  20   3    3.00    0.16
  -2  20   3    0.19    0.03
  -2  20   3    0.20    0.03
  -2  20   3    0.19    0.04
  -2  20   3    0.20    0.05
  -2  20   3    0.15    0.03
  -1  20   3    3.16    0.13
  -1  20   3    3.16    0.14
  -1  20   3    3.53    0.13
   0  20   3    0.47    0.07
   0  20   3    0.47    0.05
   0  20   3    0.49    0.05
  -1 -20  -3    1.20    0.07
   1  20   3    1.19    0.07
   1  20   3    1.22    0.09
  -2 -20  -3    0.54    0.05
   2  20   3    0.55    0.07
   2  20   3    0.60    0.07
   2  20   3    0.52    0.05
  -3 -20  -3    3.25    0.14
  -3 -20  -3    3.13    0.12
   3  20   3    3.28    0.13
  -4 -20  -3   14.06    0.44
  -4 -20  -3   13.78    0.51
   4  20   3   14.34    0.50
   4  20   3   14.44    0.45
  -5 -20  -3    2.91    0.11
  -5 -20  -3    2.80    0.13
   5  20   3    3.09    0.11
   5  20   3    2.95    0.12
   6  20   3    0.43    0.03
  -7  21   3    6.30    0.20
  -7  21   3    6.26    0.20
  -6  21   3    0.24    0.03
  -6  21   3    0.22    0.02
   5 -21  -3    2.85    0.11
  -5  21   3    2.72    0.11
  -5  21   3    2.85    0.10
  -5  21   3    2.84    0.10
  -5  21   3    2.76    0.10
  -4  21   3    4.46    0.15
  -4  21   3    4.28    0.14
  -4  21   3    4.43    0.19
  -4  21   3    4.34    0.16
  -4  21   3    4.43    0.15
  -3  21   3    5.24    0.18
  -3  21   3    5.33    0.19
  -3  21   3    5.98    0.19
  -3  21   3    5.31    0.17
  -3  21   3    4.79    0.22
  -2  21   3    3.16    0.13
  -2  21   3    3.03    0.12
  -2  21   3    3.31    0.12
  -1  21   3    7.68    0.26
  -1  21   3    8.29    0.26
  -1  21   3    7.50    0.26
   0 -21  -3   11.22    0.40
   0  21   3   10.95    0.35
   0  21   3   10.94    0.36
  -1 -21  -3    8.67    0.32
   1  21   3    8.68    0.29
   1  21   3    9.11    0.31
   1  21   3    8.28    0.32
   1  21   3    8.79    0.28
  -2 -21  -3    4.42    0.17
   2  21   3    4.07    0.17
  -3 -21  -3   11.50    0.36
  -3 -21  -3   12.19    0.43
   3  21   3   11.42    0.39
   3  21   3   11.47    0.37
  -4 -21  -3    2.18    0.11
  -4 -21  -3    2.25    0.10
   4  21   3    2.15    0.09
   4  21   3    2.26    0.10
  -5 -21  -3    0.32    0.04
  -5 -21  -3    0.20    0.04
   5  21   3    0.20    0.03
   5  21   3    0.22    0.03
  -6 -21  -3    3.54    0.12
   6  21   3    3.52    0.12
   6  21   3    3.51    0.12
   6 -22  -3    1.17    0.07
  -6  22   3    1.22    0.05
  -6  22   3    1.17    0.05
   5 -22  -3    2.83    0.11
  -5  22   3    2.83    0.10
  -5  22   3    2.87    0.10
  -4  22   3    0.17    0.02
  -4  22   3    0.12    0.03
  -4  22   3    0.17    0.03
  -4  22   3    0.15    0.04
  -3  22   3   21.00    0.70
  -3  22   3   21.82    0.68
  -3  22   3   22.31    0.69
  -3  22   3   21.61    0.68
  -3  22   3   22.18    0.68
  -2  22   3    0.60    0.05
  -2  22   3    0.70    0.06
  -2  22   3    0.63    0.05
  -2  22   3    0.63    0.05
  -2  22   3    0.77    0.08
  -1  22   3   20.21    0.69
  -1  22   3   23.37    0.72
  -1  22   3   24.86    0.73
   0 -22  -3    0.59    0.05
   0  22   3    0.81    0.07
   0  22   3    0.89    0.07
  -1 -22  -3    4.53    0.18
   1  22   3    4.49    0.16
   1  22   3    4.51    0.17
   1  22   3    4.54    0.17
   1  22   3    4.25    0.18
  -2 -22  -3    4.93    0.19
  -2 -22  -3    4.79    0.16
   2  22   3    4.64    0.18
   2  22   3    4.70    0.18
  -3 -22  -3    1.60    0.09
  -3 -22  -3    1.59    0.08
   3  22   3    1.55    0.09
  -4 -22  -3   10.07    0.38
  -4 -22  -3   10.43    0.32
   4  22   3   10.29    0.33
  -5 -22  -3    0.04    0.02
  -5 -22  -3    0.03    0.03
   5  22   3    0.05    0.02
   5  22   3    0.04    0.03
   6  22   3    0.10    0.02
   6  22   3    0.11    0.02
  -6  23   3    8.20    0.26
  -6  23   3    8.34    0.26
  -5  23   3    0.03    0.02
  -4  23   3    3.84    0.13
  -4  23   3    3.91    0.14
  -4  23   3    3.85    0.14
  -4  23   3    3.75    0.14
  -3  23   3   21.88    0.71
  -3  23   3   23.49    0.70
  -3  23   3   22.93    0.71
  -3  23   3   21.52    0.72
  -3  23   3   22.96    0.70
  -2  23   3   10.69    0.32
  -2  23   3    9.57    0.33
  -2  23   3    9.93    0.33
  -1  23   3   69.08    2.05
  -1  23   3   67.37    2.04
  -1  23   3   66.14    2.09
  -1  23   3   67.02    2.08
  -1  23   3   65.67    1.99
   0 -23  -3    0.02    0.02
   0  23   3   -0.03    0.03
   0  23   3    0.02    0.03
  -1 -23  -3    4.31    0.18
   1  23   3    4.52    0.16
   1  23   3    4.48    0.17
   1  23   3    4.44    0.17
  -2 -23  -3    1.24    0.07
  -2 -23  -3    1.17    0.07
   2  23   3    1.14    0.09
   2  23   3    1.14    0.07
   2  23   3    1.16    0.08
  -3 -23  -3    4.50    0.18
   3  23   3    4.44    0.17
   3  23   3    4.30    0.16
  -4 -23  -3    0.58    0.05
  -4 -23  -3    0.54    0.06
   4  23   3    0.45    0.05
   5  23   3    0.11    0.02
   5  23   3    0.10    0.02
  -6  24   3   -0.01    0.01
  -5  24   3    3.06    0.10
  -5  24   3    3.15    0.11
  -5  24   3    2.73    0.12
  -5  24   3    2.96    0.11
  -4  24   3    1.51    0.07
  -4  24   3    1.53    0.07
  -4  24   3    1.63    0.07
  -3  24   3    0.05    0.03
  -3  24   3    0.01    0.02
  -2  24   3    1.95    0.09
  -2  24   3    2.17    0.09
  -2  24   3    1.74    0.08
  -1  24   3   25.41    0.76
  -1  24   3   25.11    0.81
  -1  24   3   25.17    0.79
   0 -24  -3    0.63    0.05
   0  24   3    0.68    0.07
   0  24   3    0.62    0.06
   0  24   3    0.59    0.06
  -1 -24  -3    1.84    0.09
   1  24   3    1.82    0.09
   1  24   3    1.87    0.09
   1  24   3    1.78    0.09
  -2 -24  -3    1.26    0.07
  -2 -24  -3    1.20    0.07
   2  24   3    1.28    0.07
   2  24   3    1.30    0.08
   2  24   3    1.20    0.08
   2  24   3    1.19    0.09
  -3 -24  -3    0.55    0.06
  -3 -24  -3    0.49    0.05
   3  24   3    0.52    0.06
   3  24   3    0.54    0.05
   3  24   3    0.63    0.06
  -4 -24  -3    4.13    0.14
  -4 -24  -3    3.72    0.16
   4  24   3    4.25    0.14
   4  24   3    4.06    0.16
   4  24   3    4.16    0.14
  -5 -24  -3    0.00    0.02
  -5  25   3    0.05    0.01
  -4  25   3    0.65    0.04
  -3  25   3    0.37    0.04
  -3  25   3    0.33    0.04
  -3  25   3    0.35    0.04
  -2  25   3    1.31    0.08
  -2  25   3    1.39    0.07
  -2  25   3    1.41    0.07
   1 -25  -3    1.78    0.08
  -1  25   3    1.63    0.09
  -1  25   3    1.68    0.09
  -1  25   3    1.67    0.09
   0 -25  -3    1.09    0.06
   0  25   3    1.03    0.07
   0  25   3    1.02    0.07
   0  25   3    0.95    0.07
  -1 -25  -3    0.99    0.06
   1  25   3    0.94    0.07
   1  25   3    0.98    0.06
  -2 -25  -3    0.73    0.05
  -2 -25  -3    0.77    0.06
   2  25   3    0.67    0.07
   2  25   3    0.81    0.06
   2  25   3    0.81    0.06
  -3 -25  -3    1.08    0.07
  -3 -25  -3    1.11    0.06
   3  25   3    1.05    0.07
   3  25   3    1.02    0.06
  -4 -25  -3    1.11    0.07
  -4 -25  -3    1.05    0.06
   4  25   3    1.12    0.06
   4  25   3    1.10    0.05
   5  25   3    0.32    0.03
   5  25   3    0.34    0.03
  -5  26   3    0.02    0.01
  -4  26   3    0.13    0.02
  -4  26   3    0.16    0.03
  -3  26   3    0.05    0.02
  -3  26   3    0.03    0.02
  -3  26   3    0.07    0.04
  -2  26   3    0.88    0.06
   1 -26  -3    0.64    0.05
  -1  26   3    0.62    0.06
  -1  26   3    0.57    0.07
  -1  26   3    0.57    0.06
   0 -26  -3    5.39    0.20
   0  26   3    5.19    0.19
   0  26   3    5.20    0.18
   0  26   3    5.30    0.19
  -1 -26  -3    5.51    0.21
   1  26   3    5.53    0.19
   1  26   3    5.40    0.20
   1  26   3    5.46    0.19
  -2 -26  -3    1.52    0.08
   2  26   3    1.53    0.07
   2  26   3    1.40    0.08
  -3 -26  -3    0.42    0.04
  -3 -26  -3    0.37    0.05
   3  26   3    0.45    0.04
   3  26   3    0.37    0.05
  -4 -26  -3    0.19    0.02
   4  26   3    0.17    0.02
   4  26   3    0.16    0.02
  -4  27   3    1.44    0.06
  -3  27   3    0.16    0.04
  -2  27   3    0.00    0.02
  -1  27   3    1.12    0.07
  -1  27   3    1.20    0.07
   0 -27  -3    0.05    0.03
   0  27   3    0.03    0.03
   0  27   3   -0.01    0.03
   1  27   3    0.26    0.03
   1  27   3    0.25    0.04
  -2 -27  -3    1.90    0.08
  -2 -27  -3    1.77    0.09
   2  27   3    1.84    0.09
  -3 -27  -3    0.95    0.06
  -3 -27  -3    0.92    0.06
   3  27   3    0.98    0.06
  -4 -27  -3    0.01    0.02
   4  27   3    0.00    0.02
   4  27   3    0.01    0.02
  -3  28   3    4.47    0.16
  -2  28   3    0.71    0.05
   1 -28  -3    0.36    0.04
  -1  28   3    0.36    0.04
  -1  28   3    0.33    0.05
   0 -28  -3    1.86    0.09
   0  28   3    1.93    0.08
   0  28   3    1.80    0.09
  -1 -28  -3    0.83    0.05
  -1 -28  -3    0.77    0.06
   1  28   3    0.76    0.06
  -2 -28  -3    0.00    0.03
   2  28   3    0.02    0.02
   2  28   3   -0.02    0.02
  -3 -28  -3    0.68    0.04
   3  28   3    0.64    0.05
   3  28   3    0.79    0.04
  -4 -28  -3    0.81    0.04
   4  28   3    0.88    0.04
   4  28   3    0.91    0.04
  -3  29   3    0.05    0.02
  -2  29   3    1.47    0.07
  -2  29   3    1.43    0.07
  -1  29   3    0.08    0.03
  -1  29   3    0.08    0.02
   0 -29  -3    0.86    0.06
   0  29   3    0.91    0.06
   0  29   3    0.89    0.06
   0  29   3    0.97    0.06
  -1 -29  -3    2.23    0.08
  -1 -29  -3    2.04    0.10
   1  29   3    2.22    0.09
   1  29   3    2.33    0.09
  -2 -29  -3    2.47    0.09
   2  29   3    2.43    0.10
  -3 -29  -3    1.51    0.06
   3  29   3    1.51    0.06
  -3  30   3    0.51    0.04
  -2  30   3    1.60    0.07
  -1  30   3    0.84    0.05
  -1  30   3    0.88    0.05
   0 -30  -3    0.14    0.02
   0  30   3    0.12    0.02
  -1 -30  -3    1.61    0.06
   1  30   3    1.58    0.07
   1  30   3    1.46    0.07
  -2 -30  -3    0.56    0.04
   2  30   3    0.51    0.04
  -2  31   3    0.38    0.04
  -2  31   3    0.43    0.03
  -1  31   3    2.66    0.10
  -1  31   3    2.68    0.10
   0 -31  -3    0.02    0.02
   0  31   3   -0.01    0.02
   0  31   3    0.02    0.02
  -1 -31  -3    0.23    0.03
   1  31   3    0.23    0.03
   2  31  -4    0.08    0.02
  -2 -31   4    0.07    0.01
   1  31  -4    2.20    0.08
   1  31  -4    2.34    0.09
  -1 -31   4    2.36    0.08
   0  31  -4    0.11    0.02
   0  31  -4    0.08    0.02
   0 -31   4    0.12    0.02
  -1  31  -4    6.31    0.21
   3  30  -4    0.75    0.04
   3  30  -4    0.76    0.04
  -3 -30   4    0.75    0.04
   2  30  -4    0.32    0.03
   2  30  -4    0.34    0.04
  -2 -30   4    0.44    0.03
   1  30  -4    2.18    0.08
   1  30  -4    2.17    0.09
  -1 -30   4    2.24    0.08
  -1 -30   4    2.09    0.10
   0  30  -4    1.28    0.06
   0  30  -4    1.40    0.06
  -1  30  -4    1.38    0.06
  -1  30  -4    1.29    0.06
  -2  30  -4    0.28    0.03
   3  29  -4    0.73    0.05
   3  29  -4    0.77    0.04
  -3 -29   4    0.77    0.04
   2  29  -4    0.07    0.02
  -2 -29   4    0.14    0.04
  -2 -29   4    0.12    0.02
   1  29  -4    0.03    0.02
  -1 -29   4    0.00    0.02
   0  29  -4    0.63    0.05
   0  29  -4    0.61    0.05
  -1  29  -4    0.39    0.04
  -1  29  -4    0.39    0.04
  -2  29  -4    0.49    0.03
  -2  29  -4    0.44    0.04
  -2  29  -4    0.40    0.04
  -3  29  -4    0.34    0.03
  -3  29  -4    0.36    0.03
   4  28  -4    0.01    0.01
  -4 -28   4    0.03    0.02
   3  28  -4    1.56    0.06
   3  28  -4    1.49    0.07
  -3 -28   4    1.52    0.07
  -3 -28   4    1.43    0.09
   2  28  -4    3.88    0.14
  -2 -28   4    3.87    0.13
   1  28  -4    3.41    0.13
   0  28  -4    0.14    0.03
   0  28  -4    0.12    0.03
  -1  28  -4    0.02    0.03
  -1  28  -4    0.04    0.02
  -2  28  -4   -0.02    0.04
  -2  28  -4    0.02    0.02
  -2  28  -4    0.03    0.02
  -3  28  -4    0.93    0.05
  -3  28  -4    0.94    0.05
   5  27  -4    1.08    0.05
  -5 -27   4    1.19    0.05
   4  27  -4    0.01    0.02
   4  27  -4    0.07    0.02
  -4 -27   4    0.05    0.04
  -4 -27   4    0.00    0.02
   3  27  -4    1.52    0.07
  -3 -27   4    1.49    0.07
   2  27  -4    5.65    0.20
  -2 -27   4    5.43    0.18
   1  27  -4    1.35    0.07
   1  27  -4    1.18    0.07
  -1 -27   4    1.17    0.07
   0  27  -4    0.54    0.05
   0  27  -4    0.48    0.05
   0 -27   4    0.62    0.05
  -1  27  -4    0.24    0.03
  -2  27  -4    0.02    0.02
  -3  27  -4    0.25    0.03
  -4  27  -4    0.18    0.02
   4 -27   4    0.15    0.02
   5  26  -4    0.88    0.04
  -5 -26   4    0.80    0.04
   4  26  -4    0.38    0.05
   4  26  -4    0.27    0.03
  -4 -26   4    0.36    0.04
   3  26  -4    0.16    0.03
   3  26  -4    0.16    0.03
  -3 -26   4    0.12    0.03
   2  26  -4    0.44    0.06
   2  26  -4    0.47    0.05
  -2 -26   4    0.46    0.05
   1  26  -4    0.00    0.02
   1  26  -4    0.03    0.03
   1  26  -4    0.02    0.03
   1  26  -4    0.01    0.03
   0  26  -4    0.15    0.03
   0  26  -4    0.13    0.03
   0  26  -4    0.15    0.03
   0  26  -4    0.15    0.03
  -1  26  -4    0.06    0.03
  -1  26  -4    0.08    0.03
  -1  26  -4    0.13    0.03
   1 -26   4    0.10    0.03
  -2  26  -4    2.00    0.08
  -2  26  -4    2.05    0.09
  -2  26  -4    1.89    0.10
   2 -26   4    2.13    0.08
   3 -26   4    0.35    0.03
  -4  26  -4    2.11    0.08
   4 -26   4    2.20    0.07
   5  25  -4    0.08    0.02
  -5 -25   4    0.08    0.02
  -5 -25   4    0.06    0.04
   4  25  -4    1.55    0.07
   4  25  -4    1.47    0.08
  -4 -25   4    1.54    0.07
  -4 -25   4    1.47    0.09
   3  25  -4    0.40    0.05
   3  25  -4    0.38    0.05
  -3 -25   4    0.36    0.05
  -3 -25   4    0.32    0.05
   2  25  -4    8.98    0.30
   2  25  -4    8.94    0.31
  -2 -25   4    9.31    0.29
   1  25  -4    4.50    0.17
   1  25  -4    4.49    0.16
   1  25  -4    4.49    0.18
  -1 -25   4    4.41    0.18
   0  25  -4    3.87    0.15
   0  25  -4    3.85    0.16
   0  25  -4    3.87    0.14
   0  25  -4    3.71    0.15
  -1  25  -4    0.00    0.03
  -1  25  -4    0.08    0.03
  -1  25  -4   -0.03    0.03
  -2  25  -4    2.03    0.09
  -2  25  -4    1.90    0.08
  -3  25  -4    0.04    0.02
   3 -25   4    0.05    0.02
  -4  25  -4    0.08    0.02
   4 -25   4    0.13    0.02
  -5  25  -4    0.55    0.03
   5 -25   4    0.57    0.03
   6  24  -4    1.67    0.06
  -6 -24   4    1.76    0.07
   5  24  -4    2.45    0.09
  -5 -24   4    2.59    0.10
   4  24  -4    0.04    0.03
  -4 -24   4    0.01    0.02
   3  24  -4    0.71    0.06
   3  24  -4    0.72    0.06
  -3 -24   4    0.73    0.06
   2  24  -4    4.53    0.18
   2  24  -4    4.63    0.17
   2  24  -4    4.51    0.17
   2  24  -4    4.56    0.16
  -2 -24   4    4.48    0.18
   1  24  -4    5.35    0.20
   1  24  -4    5.58    0.20
   1  24  -4    5.51    0.21
  -1 -24   4    5.36    0.21
   0  24  -4    3.38    0.13
   0  24  -4    3.19    0.13
   0  24  -4    3.12    0.12
   0  24  -4    3.17    0.14
   0 -24   4    3.28    0.13
  -1  24  -4    0.05    0.03
  -1  24  -4    0.06    0.03
  -1  24  -4    0.03    0.03
  -1  24  -4    0.02    0.04
  -2  24  -4    2.51    0.10
  -2  24  -4    2.49    0.11
  -2  24  -4    2.38    0.11
   2 -24   4    2.40    0.09
  -3  24  -4    0.35    0.04
  -3  24  -4    0.43    0.05
   3 -24   4    0.39    0.03
   3 -24   4    0.29    0.04
  -4  24  -4    1.66    0.07
  -4  24  -4    1.56    0.08
   4 -24   4    1.55    0.08
  -5  24  -4    0.01    0.02
   5 -24   4    0.01    0.01
   6  23  -4    0.26    0.03
  -6 -23   4    0.18    0.02
  -5 -23   4    3.35    0.15
   4  23  -4    0.35    0.04
  -4 -23   4    0.43    0.05
   3  23  -4   65.96    1.99
   3  23  -4   64.83    2.05
  -3 -23   4   67.04    1.94
  -3 -23   4   64.49    2.24
   2  23  -4    0.47    0.06
   2  23  -4    0.47    0.07
   2  23  -4    0.42    0.05
  -2 -23   4    0.46    0.05
   1  23  -4    3.28    0.13
   1  23  -4    3.19    0.13
   1  23  -4    3.18    0.13
   1  23  -4    3.22    0.12
  -1 -23   4    3.27    0.14
   0  23  -4    0.81    0.06
   0  23  -4    0.73    0.06
   0  23  -4    0.76    0.06
   0  23  -4    0.76    0.07
   0 -23   4    0.69    0.06
  -1  23  -4    1.88    0.09
  -1  23  -4    1.89    0.09
  -1  23  -4    1.68    0.09
  -1  23  -4    1.87    0.08
   1 -23   4    1.75    0.08
  -2  23  -4    1.11    0.06
  -2  23  -4    1.22    0.07
  -2  23  -4    1.19    0.07
  -2  23  -4    1.16    0.07
  -2  23  -4    1.13    0.08
   2 -23   4    1.25    0.06
   2 -23   4    1.26    0.07
  -3  23  -4   -0.01    0.02
  -3  23  -4    0.00    0.03
  -3  23  -4    0.03    0.03
   3 -23   4    0.01    0.03
  -4  23  -4    2.14    0.09
  -4  23  -4    1.92    0.11
  -5  23  -4    0.09    0.02
  -6 -22   4    0.90    0.08
   5  22  -4    0.08    0.04
   5  22  -4    0.00    0.02
  -5 -22   4    0.04    0.02
   4  22  -4    0.83    0.06
   4  22  -4    0.87    0.07
  -4 -22   4    0.75    0.07
  -4 -22   4    0.78    0.06
   3  22  -4   39.65    1.19
   3  22  -4   38.74    1.23
  -3 -22   4   39.17    1.16
  -3 -22   4   38.54    1.35
   2  22  -4    5.17    0.19
   2  22  -4    4.89    0.18
   2  22  -4    5.11    0.18
   1  22  -4    3.50    0.14
   1  22  -4    3.63    0.14
   1  22  -4    3.49    0.14
   1  22  -4    3.54    0.14
   0  22  -4    2.14    0.10
   0  22  -4    2.04    0.09
   0  22  -4    2.20    0.10
  -1  22  -4    0.93    0.06
  -1  22  -4    1.02    0.07
  -1  22  -4    0.99    0.07
  -1  22  -4    1.08    0.07
   1 -22   4    0.90    0.06
  -2  22  -4    4.69    0.17
  -2  22  -4    4.62    0.17
  -2  22  -4    4.75    0.18
  -2  22  -4    4.57    0.16
   2 -22   4    4.86    0.17
  -3  22  -4    0.14    0.03
  -3  22  -4    0.08    0.04
  -3  22  -4    0.15    0.03
   3 -22   4    0.16    0.03
  -4  22  -4    0.42    0.04
  -5  22  -4    2.94    0.10
  -5  22  -4    3.03    0.11
  -6  22  -4    1.58    0.06
   6 -22   4    1.60    0.05
  -7 -21   4    1.71    0.06
  -6 -21   4    3.34    0.12
  -6 -21   4    3.19    0.11
   5  21  -4    0.86    0.06
   5  21  -4    0.85    0.05
   4  21  -4    1.65    0.08
   4  21  -4    1.69    0.09
  -4 -21   4    1.63    0.08
  -4 -21   4    1.59    0.09
   3  21  -4   23.62    0.74
   3  21  -4   23.27    0.71
  -3 -21   4   22.30    0.71
  -3 -21   4   23.24    0.70
   2  21  -4    4.30    0.17
   2  21  -4    4.15    0.16
   2  21  -4    4.04    0.16
   1  21  -4    6.82    0.24
   1  21  -4    6.95    0.25
   1  21  -4    6.90    0.24
   1  21  -4    6.69    0.23
  -1 -21   4    7.24    0.26
   0  21  -4    0.29    0.04
   0  21  -4    0.24    0.04
   0  21  -4    0.20    0.03
  -1  21  -4    4.00    0.18
  -1  21  -4    4.79    0.17
  -1  21  -4    5.04    0.17
  -1  21  -4    5.13    0.18
   1 -21   4    4.92    0.17
  -2  21  -4    0.17    0.04
  -2  21  -4    0.13    0.03
  -2  21  -4    0.19    0.04
  -2  21  -4    0.29    0.05
  -3  21  -4    6.67    0.25
  -3  21  -4    6.60    0.22
  -3  21  -4    6.76    0.23
  -3  21  -4    6.78    0.23
   3 -21   4    6.50    0.23
  -4  21  -4    3.27    0.12
  -4  21  -4    3.39    0.13
  -4  21  -4    3.18    0.13
  -5  21  -4    0.06    0.02
  -5  21  -4    0.06    0.02
  -6  21  -4    2.14    0.08
  -7 -20   4    1.61    0.06
  -6 -20   4    1.81    0.10
   5  20  -4    0.04    0.02
  -5 -20   4    0.05    0.03
  -5 -20   4    0.11    0.03
   4  20  -4    7.14    0.24
  -4 -20   4    6.59    0.24
  -4 -20   4    7.37    0.24
  -4 -20   4    7.10    0.27
   3  20  -4   14.37    0.47
  -3 -20   4   15.64    0.46
   2  20  -4    0.40    0.05
   2  20  -4    0.26    0.04
  -2 -20   4    0.24    0.04
   1  20  -4    5.51    0.20
   1  20  -4    5.30    0.19
  -1 -20   4    5.29    0.20
   0  20  -4   21.05    0.67
   0  20  -4   22.53    0.73
   0  20  -4   20.99    0.68
  -1  20  -4    0.01    0.04
  -1  20  -4    0.01    0.04
  -1  20  -4    0.05    0.03
  -1  20  -4    0.01    0.02
   1 -20   4    0.01    0.02
  -2  20  -4    0.22    0.04
  -2  20  -4    0.24    0.04
  -2  20  -4    0.15    0.04
  -2  20  -4    0.18    0.06
   2 -20   4    0.20    0.03
  -3  20  -4   12.01    0.43
  -3  20  -4   12.19    0.40
  -3  20  -4   12.10    0.39
  -4  20  -4    9.86    0.33
  -4  20  -4    9.83    0.33
  -4  20  -4    9.84    0.32
   4 -20   4   10.30    0.34
  -5  20  -4    0.37    0.04
   5 -20   4    0.33    0.04
  -6  20  -4    0.58    0.04
  -7 -19   4    2.25    0.08
   6  19  -4    1.42    0.07
   6  19  -4    1.47    0.07
  -6 -19   4    1.61    0.07
   5  19  -4    0.09    0.03
   5  19  -4    0.12    0.03
  -5 -19   4    0.09    0.03
  -5 -19   4    0.10    0.03
  -5 -19   4    0.10    0.04
   4  19  -4    1.61    0.08
  -4 -19   4    1.62    0.08
   3  19  -4    1.48    0.09
   3  19  -4    1.36    0.08
   3  19  -4    1.45    0.08
  -3 -19   4    1.37    0.08
   2  19  -4    0.62    0.05
  -2 -19   4    0.63    0.05
   1  19  -4    2.08    0.09
   1  19  -4    2.24    0.09
   1  19  -4    1.85    0.10
   0  19  -4    1.31    0.08
   0  19  -4    1.24    0.07
  -1  19  -4    4.80    0.17
  -1  19  -4    4.82    0.17
  -1  19  -4    4.63    0.18
  -1  19  -4    4.76    0.18
  -1  19  -4    4.47    0.17
  -2  19  -4   23.77    0.74
  -2  19  -4   23.19    0.80
  -2  19  -4   22.62    0.75
  -2  19  -4   23.45    0.73
  -2  19  -4   24.64    0.75
   2 -19   4   24.26    0.77
  -3  19  -4   11.65    0.40
  -3  19  -4   11.27    0.37
  -3  19  -4   11.46    0.38
  -4  19  -4    4.07    0.14
  -4  19  -4    4.26    0.15
  -4  19  -4    3.80    0.15
  -4  19  -4    4.08    0.16
   4 -19   4    4.11    0.15
  -5  19  -4    0.23    0.03
   5 -19   4    0.29    0.03
  -6  19  -4    0.54    0.04
  -7 -18   4    1.56    0.07
  -7 -18   4    1.44    0.09
  -7 -18   4    1.49    0.06
   6  18  -4    0.64    0.05
   6  18  -4    0.56    0.05
  -6 -18   4    0.65    0.05
  -6 -18   4    0.67    0.07
  -6 -18   4    0.66    0.05
   5  18  -4    2.56    0.10
  -5 -18   4    2.54    0.12
  -5 -18   4    2.43    0.10
  -5 -18   4    2.53    0.11
  -4 -18   4    0.32    0.04
   3  18  -4    0.91    0.07
   3  18  -4    0.93    0.06
  -3 -18   4    0.95    0.06
   2  18  -4    0.09    0.03
   1  18  -4    2.59    0.11
  -1 -18   4    2.57    0.11
   0  18  -4    2.30    0.11
   0  18  -4    2.51    0.10
   0  18  -4    2.41    0.11
   0 -18   4    2.41    0.09
  -1  18  -4    2.61    0.12
  -1  18  -4    2.92    0.12
  -1  18  -4    2.94    0.12
  -1  18  -4    2.77    0.13
   1 -18   4    2.82    0.11
  -2  18  -4    3.12    0.12
  -2  18  -4    3.42    0.13
   2 -18   4    3.52    0.12
  -3  18  -4   13.93    0.44
  -3  18  -4   13.98    0.46
  -3  18  -4   11.77    0.43
   3 -18   4   13.75    0.44
  -4  18  -4    0.53    0.05
  -4  18  -4    0.66    0.08
  -4  18  -4    0.46    0.04
  -4  18  -4    0.56    0.05
   4 -18   4    0.51    0.04
  -5  18  -4    6.69    0.22
  -5  18  -4    6.37    0.21
   5 -18   4    6.37    0.23
  -6  18  -4    0.15    0.02
   6 -18   4    0.16    0.02
  -7 -17   4    0.70    0.05
  -7 -17   4    0.73    0.04
   6  17  -4    7.51    0.24
   6  17  -4    7.40    0.28
  -6 -17   4    7.65    0.25
  -6 -17   4    7.60    0.25
   5  17  -4    2.12    0.09
  -5 -17   4    2.25    0.10
  -5 -17   4    2.24    0.11
   4  17  -4    1.99    0.09
  -4 -17   4    1.91    0.10
   3  17  -4    6.13    0.23
   3  17  -4    6.23    0.22
  -2 -17   4    0.15    0.03
  -2 -17   4    0.25    0.05
   1  17  -4    0.23    0.03
   0  17  -4    6.91    0.24
   0 -17   4    6.55    0.23
  -1  17  -4   10.62    0.35
  -1  17  -4   10.15    0.35
  -1  17  -4   10.58    0.37
   1 -17   4   10.84    0.35
  -2  17  -4   20.85    0.66
   2 -17   4   20.84    0.68
  -3  17  -4   50.05    1.54
  -3  17  -4   50.52    1.66
  -3  17  -4   50.29    1.57
  -3  17  -4   50.06    1.55
  -3  17  -4   49.75    1.53
   3 -17   4   51.42    1.63
  -4  17  -4   13.59    0.43
  -4  17  -4   13.42    0.44
  -4  17  -4   13.16    0.43
   4 -17   4   13.27    0.45
  -5  17  -4   10.09    0.32
  -5  17  -4   10.38    0.34
  -5  17  -4    9.67    0.33
   5 -17   4   10.49    0.34
  -6  17  -4    0.34    0.03
   6 -17   4    0.27    0.03
  -8 -16   4    0.03    0.01
  -8 -16   4    0.02    0.01
   7  16  -4    0.20    0.03
  -7 -16   4    0.19    0.05
   6  16  -4    0.19    0.03
  -6 -16   4    0.10    0.04
  -6 -16   4    0.14    0.03
  -6 -16   4    0.14    0.03
   5  16  -4    0.01    0.03
  -5 -16   4    0.01    0.03
  -5 -16   4    0.01    0.03
   4  16  -4    2.35    0.10
  -4 -16   4    2.29    0.11
   3  16  -4    0.52    0.04
  -3 -16   4    0.51    0.05
   2  16  -4    5.59    0.20
  -2 -16   4    5.58    0.21
  -2 -16   4    5.42    0.24
   1  16  -4    1.17    0.06
  -1 -16   4    1.40    0.09
   0  16  -4    0.49    0.04
  -1  16  -4    0.10    0.02
   1 -16   4    0.11    0.02
  -2  16  -4    3.39    0.13
  -2  16  -4    3.77    0.14
   2 -16   4    3.76    0.13
  -3  16  -4    0.47    0.05
  -3  16  -4    0.46    0.05
  -3  16  -4    0.46    0.05
  -3  16  -4    0.54    0.06
   3 -16   4    0.46    0.04
  -4  16  -4    2.14    0.08
  -4  16  -4    2.23    0.10
   4 -16   4    2.16    0.09
  -5  16  -4    1.45    0.07
  -5  16  -4    1.37    0.06
  -5  16  -4    1.52    0.08
   5 -16   4    1.50    0.07
  -6  16  -4    0.03    0.03
  -6  16  -4    0.02    0.03
  -8 -15   4    0.29    0.03
  -8 -15   4    0.39    0.03
  -8 -15   4    0.44    0.03
  -7 -15   4   10.38    0.33
  -7 -15   4   10.97    0.34
   6  15  -4    0.52    0.05
   6  15  -4    0.42    0.04
  -6 -15   4    0.50    0.05
  -6 -15   4    0.41    0.05
  -6 -15   4    0.44    0.06
  -5 -15   4    0.05    0.03
  -5 -15   4    0.03    0.03
   4  15  -4    2.26    0.10
   4  15  -4    2.26    0.12
  -4 -15   4    2.29    0.11
   3  15  -4    8.65    0.30
  -3 -15   4    8.25    0.31
  -3 -15   4    8.24    0.35
   2  15  -4   18.83    0.62
   2  15  -4   17.87    0.64
  -2 -15   4   18.07    0.71
  -2 -15   4   19.16    0.64
  -1 -15   4    0.35    0.04
  -1 -15   4    0.28    0.04
   0  15  -4    0.03    0.02
   0 -15   4    0.01    0.03
   0 -15   4    0.00    0.02
  -1  15  -4    0.50    0.04
   1 -15   4    0.50    0.03
  -2  15  -4    0.39    0.05
   2 -15   4    0.36    0.03
  -3  15  -4    0.19    0.04
  -3  15  -4    0.12    0.04
  -3  15  -4    0.04    0.03
   3 -15   4    0.08    0.02
  -4  15  -4    0.25    0.04
  -4  15  -4    0.29    0.03
  -4  15  -4    0.30    0.04
   4 -15   4    0.32    0.03
  -5  15  -4    4.31    0.15
  -5  15  -4    4.14    0.15
  -5  15  -4    4.35    0.14
  -5  15  -4    4.23    0.16
   5 -15   4    4.36    0.16
  -6  15  -4    0.16    0.02
  -6  15  -4    0.14    0.02
  -6  15  -4    0.19    0.03
  -6  15  -4    0.21    0.03
  -7  15  -4    0.25    0.03
  -8 -14   4    0.08    0.02
  -8 -14   4    0.07    0.02
  -8 -14   4    0.07    0.02
   7  14  -4    2.25    0.10
  -7 -14   4    2.53    0.09
  -7 -14   4    2.50    0.10
   6  14  -4    0.02    0.03
   6  14  -4    0.04    0.02
  -6 -14   4    0.00    0.03
  -6 -14   4    0.03    0.03
  -6 -14   4    0.01    0.03
   5  14  -4    2.61    0.11
  -5 -14   4    2.55    0.12
   4  14  -4    1.96    0.09
   3  14  -4    0.62    0.05
  -3 -14   4    0.64    0.05
   2  14  -4    0.08    0.03
   2  14  -4    0.10    0.03
  -2 -14   4    0.14    0.03
  -2 -14   4    0.08    0.04
  -1 -14   4    0.54    0.04
  -1 -14   4    0.54    0.05
   0  14  -4   58.56    1.91
   0 -14   4   58.96    2.15
   0 -14   4   57.35    1.87
   1 -14   4    2.15    0.11
   2 -14   4    0.77    0.04
  -3  14  -4    0.11    0.04
  -3  14  -4    0.11    0.03
  -3  14  -4    0.10    0.04
   3 -14   4    0.09    0.02
  -4  14  -4   11.28    0.37
  -4  14  -4   11.36    0.36
  -4  14  -4   11.34    0.34
   4 -14   4   10.70    0.38
  -5  14  -4    5.99    0.20
  -5  14  -4    6.03    0.19
  -5  14  -4    6.13    0.21
  -5  14  -4    5.93    0.20
   5 -14   4    5.86    0.21
  -6  14  -4   19.25    0.61
  -6  14  -4   19.04    0.59
   6 -14   4   19.31    0.63
  -7  14  -4    0.66    0.04
  -8 -13   4    0.00    0.02
  -8 -13   4    0.00    0.02
  -8 -13   4    0.03    0.02
  -8 -13   4   -0.03    0.03
   7  13  -4    0.09    0.02
  -7 -13   4    0.04    0.03
  -7 -13   4    0.03    0.03
  -7 -13   4    0.06    0.02
   6  13  -4    0.06    0.03
  -6 -13   4    0.06    0.03
  -6 -13   4    0.05    0.03
  -6 -13   4    0.03    0.03
  -6 -13   4    0.01    0.05
   5  13  -4    6.88    0.25
  -5 -13   4    6.97    0.26
   4  13  -4    3.73    0.14
  -4 -13   4    3.73    0.15
   3  13  -4   14.06    0.47
   3  13  -4   14.52    0.49
  -3 -13   4   13.58    0.49
   2  13  -4    7.53    0.25
   2  13  -4    7.34    0.26
  -2 -13   4    7.69    0.29
  -2 -13   4    6.31    0.26
   1  13  -4    0.25    0.03
   0  13  -4   16.86    0.56
   0  13  -4   15.69    0.63
   0 -13   4   17.09    0.54
   1 -13   4   20.37    0.68
   1 -13   4   21.24    0.78
   2 -13   4    4.03    0.14
  -3  13  -4    0.02    0.02
   3 -13   4    0.02    0.02
  -4  13  -4    0.09    0.03
  -4  13  -4    0.10    0.04
  -4  13  -4    0.06    0.03
   4 -13   4    0.05    0.02
  -5  13  -4    5.76    0.21
  -5  13  -4    5.78    0.18
  -5  13  -4    5.71    0.19
  -5  13  -4    5.72    0.19
   5 -13   4    5.91    0.21
  -6  13  -4    9.92    0.31
  -6  13  -4    9.98    0.33
   6 -13   4    9.89    0.34
  -7  13  -4    4.63    0.15
  -7  13  -4    4.80    0.15
  -8 -12   4    0.66    0.04
  -8 -12   4    0.60    0.06
  -8 -12   4    0.62    0.04
  -8 -12   4    0.65    0.04
   7  12  -4    0.50    0.04
  -7 -12   4    0.38    0.05
  -7 -12   4    0.43    0.05
   6  12  -4    9.48    0.33
  -6 -12   4    9.10    0.30
  -6 -12   4    8.82    0.37
  -6 -12   4    9.11    0.30
  -6 -12   4    9.68    0.34
   5  12  -4    4.94    0.19
  -5 -12   4    5.02    0.20
   4  12  -4    0.40    0.04
  -4 -12   4    0.49    0.05
   3  12  -4   26.83    0.96
  -3 -12   4   29.08    0.96
   2  12  -4    2.40    0.10
   2  12  -4    2.42    0.10
  -2 -12   4    2.43    0.10
  -2 -12   4    2.58    0.10
   1  12  -4   18.92    0.64
  -1 -12   4   19.29    0.62
   0  12  -4   14.97    0.50
   0  12  -4   13.82    0.56
   0 -12   4   15.47    0.48
  -1  12  -4    1.99    0.10
   1 -12   4    2.05    0.08
  -2  12  -4    0.50    0.03
  -2  12  -4    0.50    0.04
   2 -12   4    0.51    0.03
   2 -12   4    0.54    0.05
  -3  12  -4    4.56    0.18
  -3  12  -4    4.75    0.17
   3 -12   4    4.53    0.16
  -4  12  -4    4.86    0.18
  -4  12  -4    4.97    0.18
  -4  12  -4    5.38    0.19
  -4  12  -4    5.13    0.18
  -4  12  -4    5.19    0.19
   4 -12   4    5.32    0.18
  -5  12  -4    1.01    0.07
  -5  12  -4    1.05    0.07
  -5  12  -4    1.16    0.06
  -5  12  -4    1.08    0.06
   5 -12   4    1.18    0.06
  -6  12  -4    6.74    0.23
  -6  12  -4    6.88    0.22
   6 -12   4    6.88    0.24
  -7  12  -4    1.23    0.05
  -8 -11   4    0.35    0.04
  -8 -11   4    0.35    0.04
  -8 -11   4    0.35    0.04
   7  11  -4    0.81    0.06
  -7 -11   4    0.80    0.06
  -7 -11   4    0.74    0.10
  -7 -11   4    0.83    0.06
   6  11  -4    1.05    0.06
  -6 -11   4    1.05    0.07
  -6 -11   4    0.89    0.09
   5  11  -4    2.31    0.10
  -5 -11   4    2.38    0.11
  -5 -11   4    2.36    0.10
   4  11  -4    0.27    0.04
   4  11  -4    0.27    0.04
  -4 -11   4    0.25    0.04
   3  11  -4    0.72    0.05
  -3 -11   4    0.74    0.05
   2  11  -4    0.19    0.03
  -2 -11   4    0.23    0.04
  -2 -11   4    0.19    0.03
   0  11  -4    2.66    0.12
   0  11  -4    2.74    0.10
   0 -11   4    2.67    0.10
  -1  11  -4    7.52    0.30
  -1  11  -4    7.72    0.26
   1 -11   4    7.77    0.26
  -2  11  -4    6.02    0.23
   2 -11   4    6.21    0.24
   2 -11   4    5.97    0.21
  -3  11  -4    0.90    0.06
  -3  11  -4    0.88    0.05
   3 -11   4    0.97    0.05
  -4  11  -4    5.11    0.19
  -4  11  -4    5.60    0.20
  -4  11  -4    5.47    0.21
  -4  11  -4    5.45    0.17
  -4  11  -4    5.19    0.19
  -4  11  -4    5.78    0.18
  -4  11  -4    5.78    0.22
  -4  11  -4    5.31    0.19
  -4  11  -4    5.85    0.21
   4 -11   4    5.91    0.20
  -5  11  -4    0.28    0.04
  -5  11  -4    0.36    0.05
  -5  11  -4    0.30    0.04
  -5  11  -4    0.34    0.04
   5 -11   4    0.30    0.04
  -6  11  -4    7.69    0.24
  -6  11  -4    7.70    0.25
  -6  11  -4    7.66    0.26
   6 -11   4    7.69    0.26
   6 -11   4    7.30    0.23
  -7  11  -4    0.09    0.02
  -7  11  -4    0.04    0.02
   8  10  -4    0.77    0.04
  -8 -10   4    0.69    0.05
  -8 -10   4    0.72    0.05
  -8 -10   4    0.75    0.05
   7  10  -4    0.13    0.03
   7  10  -4    0.10    0.03
  -7 -10   4    0.06    0.03
  -7 -10   4    0.09    0.03
  -7 -10   4    0.10    0.04
  -7 -10   4    0.18    0.06
   6  10  -4    1.19    0.07
  -6 -10   4    1.23    0.09
  -6 -10   4    1.26    0.07
  -6 -10   4    1.18    0.07
   5  10  -4    3.98    0.16
   4  10  -4    0.53    0.04
   4  10  -4    0.43    0.06
  -4 -10   4    0.53    0.05
   3  10  -4    3.07    0.12
  -3 -10   4    2.93    0.11
  -3 -10   4    2.97    0.12
   2  10  -4    8.39    0.30
   2  10  -4    8.67    0.29
  -2 -10   4    8.04    0.28
  -2 -10   4    8.56    0.30
   1  10  -4   20.34    0.77
  -1 -10   4   20.83    0.67
   0  10  -4    0.02    0.02
   0  10  -4    0.00    0.02
   0 -10   4    0.04    0.01
   0 -10   4    0.03    0.01
  -1  10  -4   58.17    2.14
  -1  10  -4   58.65    1.90
   1 -10   4   57.52    1.87
  -2  10  -4   33.26    1.11
  -2  10  -4   34.69    1.24
  -2  10  -4   31.62    1.25
   2 -10   4   35.41    1.09
  -3  10  -4    3.33    0.13
  -3  10  -4    3.41    0.13
   3 -10   4    3.37    0.12
  -4  10  -4   -0.03    0.04
  -4  10  -4   -0.02    0.03
  -4  10  -4   -0.01    0.03
  -4  10  -4   -0.06    0.04
   4 -10   4    0.02    0.02
  -5  10  -4    0.13    0.03
  -5  10  -4    0.16    0.03
  -5  10  -4    0.13    0.04
   5 -10   4    0.17    0.04
   5 -10   4    0.10    0.02
  -6  10  -4    0.42    0.04
  -6  10  -4    0.38    0.05
  -6  10  -4    0.41    0.04
   6 -10   4    0.39    0.04
   6 -10   4    0.37    0.04
  -7  10  -4    3.94    0.13
  -8  10  -4   -0.01    0.01
   8   9  -4    2.54    0.09
  -8  -9   4    2.49    0.10
  -8  -9   4    2.40    0.12
  -8  -9   4    2.60    0.10
   7   9  -4    1.03    0.06
  -7  -9   4    1.01    0.06
  -7  -9   4    1.14    0.08
  -7  -9   4    1.10    0.07
  -7  -9   4    1.01    0.10
   6   9  -4   14.25    0.51
  -6  -9   4   15.00    0.57
   5   9  -4    0.33    0.04
   4   9  -4   14.28    0.54
   4   9  -4   13.94    0.49
  -4  -9   4   13.50    0.46
  -4  -9   4   14.29    0.49
   3   9  -4    0.04    0.02
  -3  -9   4    0.01    0.02
   2   9  -4    0.14    0.03
   2   9  -4    0.16    0.03
  -2  -9   4    0.18    0.03
  -2  -9   4    0.19    0.02
   1   9  -4    8.33    0.32
  -1  -9   4    8.38    0.32
   0   9  -4    7.35    0.28
   0  -9   4    7.26    0.24
   0  -9   4    7.10    0.28
  -1   9  -4   65.65    2.37
  -1   9  -4   63.90    2.11
   1  -9   4   63.76    2.07
  -2   9  -4   13.80    0.54
  -2   9  -4   13.68    0.48
  -2   9  -4   15.16    0.53
  -2   9  -4   14.13    0.49
   2  -9   4   14.76    0.47
  -3   9  -4    0.39    0.05
  -3   9  -4    0.39    0.03
  -3   9  -4    0.40    0.03
   3  -9   4    0.35    0.03
   3  -9   4    0.35    0.05
  -4   9  -4    0.92    0.05
  -4   9  -4    0.93    0.05
  -4   9  -4    0.85    0.07
  -4   9  -4    0.72    0.07
   4  -9   4    1.01    0.05
  -5   9  -4    4.07    0.16
  -5   9  -4    4.27    0.14
  -5   9  -4    4.24    0.16
  -5   9  -4    4.19    0.15
   5  -9   4    4.13    0.15
   5  -9   4    4.01    0.14
  -6   9  -4    4.63    0.17
  -6   9  -4    4.80    0.15
  -6   9  -4    4.85    0.18
   6  -9   4    4.57    0.15
   6  -9   4    4.54    0.17
  -7   9  -4   11.43    0.37
  -7   9  -4   12.14    0.36
  -8   9  -4    0.00    0.02
  -9  -8   4    0.44    0.03
  -9  -8   4    0.44    0.03
  -9  -8   4    0.47    0.03
  -9  -8   4    0.46    0.03
   8   8  -4    0.27    0.03
  -8  -8   4    0.30    0.04
   7   8  -4    1.25    0.07
  -7  -8   4    1.15    0.10
  -7  -8   4    1.28    0.07
  -7  -8   4    1.19    0.07
  -7  -8   4    1.21    0.08
   6   8  -4    0.13    0.03
  -6  -8   4    0.14    0.03
  -6  -8   4    0.12    0.03
  -6  -8   4    0.13    0.04
   5   8  -4    3.23    0.13
   5   8  -4    3.10    0.13
  -5  -8   4    3.13    0.13
   4   8  -4    3.11    0.13
   4   8  -4    3.26    0.14
  -4  -8   4    3.31    0.12
  -4  -8   4    3.38    0.13
   3   8  -4    0.21    0.03
  -3  -8   4    0.24    0.03
  -3  -8   4    0.21    0.03
   2   8  -4    0.02    0.02
  -2  -8   4    0.07    0.02
   1   8  -4    0.20    0.02
   1   8  -4    0.20    0.03
  -1  -8   4    0.23    0.02
   0   8  -4   20.51    0.74
   0   8  -4   18.44    0.66
   0  -8   4   20.61    0.74
   1  -8   4    0.22    0.02
   1  -8   4    0.24    0.02
  -2   8  -4    3.33    0.13
  -2   8  -4    3.62    0.13
  -2   8  -4    3.37    0.14
   2  -8   4    3.48    0.12
  -3   8  -4    0.95    0.05
  -3   8  -4    0.87    0.06
   3  -8   4    0.92    0.06
   3  -8   4    0.96    0.05
  -4   8  -4    0.32    0.03
  -4   8  -4    0.33    0.05
   4  -8   4    0.24    0.03
  -5   8  -4    0.88    0.07
  -5   8  -4    0.86    0.07
  -5   8  -4    0.98    0.06
  -5   8  -4    1.05    0.07
  -5   8  -4    1.05    0.06
  -5   8  -4    0.91    0.06
   5  -8   4    1.00    0.05
   5  -8   4    0.96    0.06
  -6   8  -4    3.51    0.14
  -6   8  -4    3.50    0.12
  -6   8  -4    3.60    0.14
  -6   8  -4    3.53    0.13
   6  -8   4    3.61    0.14
   6  -8   4    3.65    0.12
  -7   8  -4    0.15    0.03
  -7   8  -4    0.17    0.02
  -8   8  -4    0.77    0.04
   9   7  -4    0.12    0.01
  -9  -7   4    0.10    0.02
  -9  -7   4    0.13    0.02
  -9  -7   4    0.18    0.02
  -9  -7   4    0.11    0.02
   8   7  -4    0.71    0.05
   8   7  -4    0.69    0.04
  -8  -7   4    0.63    0.05
  -8  -7   4    0.73    0.05
   7   7  -4    7.16    0.27
  -7  -7   4    7.59    0.24
  -7  -7   4    7.33    0.24
  -7  -7   4    7.23    0.30
  -7  -7   4    6.93    0.27
   6   7  -4    1.79    0.09
  -6  -7   4    1.87    0.10
  -6  -7   4    1.79    0.09
   5   7  -4    4.17    0.16
   5   7  -4    3.83    0.15
  -5  -7   4    3.92    0.16
   4   7  -4    1.37    0.08
   4   7  -4    1.34    0.07
  -4  -7   4    1.27    0.07
  -4  -7   4    1.35    0.07
   3   7  -4    0.63    0.04
  -3  -7   4    0.69    0.04
  -3  -7   4    0.68    0.05
   2   7  -4    3.60    0.13
  -1  -7   4   37.78    1.39
   0   7  -4   14.14    0.51
   0   7  -4   16.80    0.58
   0  -7   4   15.58    0.58
  -1   7  -4   10.16    0.38
   1  -7   4   10.50    0.38
   1  -7   4    9.96    0.33
  -2   7  -4   21.31    0.79
  -2   7  -4   20.99    0.72
  -2   7  -4   20.72    0.70
  -2   7  -4   21.58    0.78
   2  -7   4   21.06    0.69
  -3   7  -4    0.17    0.02
  -3   7  -4    0.24    0.03
   3  -7   4    0.19    0.02
  -4   7  -4    4.29    0.17
  -4   7  -4    4.43    0.17
   4  -7   4    4.81    0.16
  -5   7  -4    4.83    0.18
  -5   7  -4    4.72    0.17
  -5   7  -4    4.66    0.18
  -5   7  -4    4.88    0.17
  -5   7  -4    5.02    0.16
   5  -7   4    4.98    0.18
   5  -7   4    4.73    0.16
  -6   7  -4    6.73    0.23
  -6   7  -4    6.89    0.26
  -6   7  -4    6.95    0.24
  -6   7  -4    7.15    0.23
   6  -7   4    7.16    0.24
   6  -7   4    6.99    0.22
  -7   7  -4    2.15    0.08
  -7   7  -4    2.19    0.10
  -7   7  -4    2.29    0.09
   7  -7   4    2.34    0.09
  -8   7  -4    0.17    0.02
   8  -7   4    0.21    0.02
   9   6  -4    0.32    0.02
  -9  -6   4    0.27    0.03
  -9  -6   4    0.34    0.03
  -9  -6   4    0.33    0.03
  -8  -6   4    0.32    0.04
  -8  -6   4    0.22    0.03
   7   6  -4    2.84    0.12
  -7  -6   4    2.66    0.11
  -7  -6   4    2.73    0.11
  -7  -6   4    2.72    0.11
  -7  -6   4    2.81    0.13
  -7  -6   4    2.73    0.14
   6   6  -4    1.34    0.07
  -6  -6   4    1.33    0.08
  -6  -6   4    1.33    0.09
  -6  -6   4    1.63    0.08
   5   6  -4    0.04    0.02
  -5  -6   4    0.06    0.03
  -5  -6   4    0.06    0.03
   4   6  -4    1.73    0.09
   4   6  -4    1.81    0.08
  -4  -6   4    1.61    0.08
  -4  -6   4    1.82    0.08
   3   6  -4    6.62    0.24
  -3  -6   4    6.88    0.22
  -3  -6   4    6.58    0.26
  -3  -6   4    6.43    0.24
   2   6  -4    4.87    0.18
  -2  -6   4    4.62    0.18
   1   6  -4    0.00    0.01
  -1  -6   4    0.01    0.01
   0   6  -4    1.06    0.05
  -1   6  -4   74.77    2.70
   1  -6   4   70.67    2.35
   1  -6   4   74.40    2.71
  -2   6  -4   10.59    0.38
  -2   6  -4   10.04    0.39
  -2   6  -4    9.64    0.34
   2  -6   4   10.36    0.34
  -3   6  -4   16.45    0.69
  -3   6  -4   18.64    0.67
  -3   6  -4   19.46    0.63
  -4   6  -4   13.26    0.47
  -5   6  -4    0.23    0.04
  -5   6  -4    0.10    0.03
   5  -6   4    0.14    0.03
  -6   6  -4    6.44    0.25
  -6   6  -4    6.61    0.22
  -6   6  -4    6.56    0.23
  -6   6  -4    6.63    0.22
   6  -6   4    6.81    0.23
   6  -6   4    6.71    0.21
  -7   6  -4    1.31    0.06
  -7   6  -4    1.15    0.06
  -8   6  -4    1.55    0.06
  -8   6  -4    1.54    0.06
   8  -6   4    1.62    0.06
   9   5  -4    0.34    0.03
  -9  -5   4    0.31    0.03
  -9  -5   4    0.36    0.03
  -9  -5   4    0.41    0.03
  -8  -5   4    2.48    0.10
  -8  -5   4    2.39    0.09
   7   5  -4    1.02    0.06
  -7  -5   4    0.95    0.06
  -7  -5   4    0.90    0.06
  -7  -5   4    0.95    0.09
  -7  -5   4    0.84    0.07
  -7  -5   4    0.93    0.06
   6   5  -4    0.30    0.04
  -6  -5   4    0.23    0.04
  -6  -5   4    0.32    0.05
   5   5  -4    0.97    0.06
  -5  -5   4    1.08    0.06
  -5  -5   4    0.95    0.06
   4   5  -4   -0.03    0.02
   4   5  -4    0.01    0.02
  -4  -5   4    0.06    0.03
  -4  -5   4    0.02    0.02
   3   5  -4    5.59    0.20
  -3  -5   4    5.44    0.22
  -3  -5   4    5.59    0.19
  -3  -5   4    5.54    0.20
   2   5  -4    1.53    0.06
  -2  -5   4    1.44    0.06
   1   5  -4    1.42    0.06
  -1  -5   4    1.44    0.06
   0   5  -4    3.59    0.14
   0  -5   4    3.43    0.14
  -1   5  -4    8.06    0.31
   1  -5   4    8.48    0.31
  -2   5  -4   18.94    0.64
  -2   5  -4   19.31    0.71
  -2   5  -4   18.59    0.71
  -2   5  -4   20.14    0.66
   2  -5   4   19.23    0.71
   2  -5   4   18.84    0.62
  -3   5  -4   37.21    1.26
  -3   5  -4   35.18    1.36
  -3   5  -4   37.75    1.35
  -4   5  -4    2.45    0.10
  -5   5  -4    1.87    0.09
  -5   5  -4    1.78    0.08
  -5   5  -4    1.84    0.10
  -5   5  -4    1.90    0.09
   5  -5   4    1.85    0.08
  -6   5  -4    7.35    0.26
  -6   5  -4    7.12    0.25
  -6   5  -4    6.55    0.23
  -6   5  -4    6.77    0.23
   6  -5   4    7.17    0.24
   6  -5   4    7.01    0.22
  -7   5  -4    0.04    0.02
  -7   5  -4    0.01    0.02
   7  -5   4    0.08    0.02
  -8   5  -4    0.33    0.03
   8  -5   4    0.31    0.03
   9   4  -4    0.40    0.03
  -9  -4   4    0.46    0.03
  -9  -4   4    0.48    0.03
  -9  -4   4    0.47    0.03
  -9  -4   4    0.50    0.03
   8   4  -4    0.35    0.04
  -8  -4   4    0.35    0.04
  -8  -4   4    0.34    0.05
  -8  -4   4    0.41    0.04
  -8  -4   4    0.30    0.04
   7   4  -4    0.67    0.05
  -7  -4   4    0.69    0.08
  -7  -4   4    0.65    0.06
  -7  -4   4    0.53    0.06
  -7  -4   4    0.66    0.05
  -7  -4   4    0.61    0.05
   6   4  -4   30.07    0.97
  -6  -4   4   27.48    0.80
  -6  -4   4   27.47    0.87
  -6  -4   4   27.90    0.97
  -6  -4   4   27.42    1.05
   5   4  -4    1.43    0.07
  -5  -4   4    1.45    0.07
  -5  -4   4    1.37    0.08
   4   4  -4    6.11    0.23
   4   4  -4    5.46    0.21
  -4  -4   4    5.72    0.21
  -4  -4   4    5.41    0.20
   3   4  -4   13.67    0.48
  -3  -4   4   13.91    0.52
  -3  -4   4   13.94    0.45
   2   4  -4   26.68    0.99
  -2  -4   4   26.89    0.99
   1   4  -4   19.31    0.72
  -1  -4   4   19.59    0.72
   0   4  -4   67.23    2.56
   0  -4   4   71.20    2.57
  -1   4  -4    6.50    0.25
   1  -4   4    6.75    0.25
  -2   4  -4    0.30    0.03
   2  -4   4    0.37    0.03
   2  -4   4    0.37    0.03
  -3   4  -4    6.68    0.23
  -3   4  -4    6.04    0.25
  -3   4  -4    6.10    0.24
  -4   4  -4   10.69    0.37
   4  -4   4   10.03    0.40
  -5   4  -4    0.26    0.04
  -5   4  -4    0.36    0.05
  -5   4  -4    0.28    0.04
  -5   4  -4    0.29    0.04
   5  -4   4    0.30    0.04
   5  -4   4    0.35    0.04
  -6   4  -4    1.14    0.06
  -6   4  -4    1.01    0.06
  -6   4  -4    0.97    0.08
  -6   4  -4    1.04    0.06
   6  -4   4    1.12    0.06
   6  -4   4    1.10    0.06
  -7   4  -4    5.80    0.21
  -7   4  -4    6.32    0.20
  -7   4  -4    6.16    0.19
   7  -4   4    6.20    0.19
   7  -4   4    5.88    0.21
   8  -4   4    4.14    0.13
   9   3  -4    2.38    0.08
  -9  -3   4    2.58    0.09
  -9  -3   4    2.51    0.08
  -9  -3   4    2.50    0.09
  -8  -3   4    0.04    0.02
  -8  -3   4    0.05    0.03
  -8  -3   4    0.04    0.02
  -8  -3   4    0.03    0.02
  -8  -3   4   -0.02    0.03
   7   3  -4    0.19    0.03
  -7  -3   4    0.15    0.03
  -7  -3   4    0.22    0.03
  -7  -3   4    0.15    0.03
  -7  -3   4    0.22    0.05
   6   3  -4    3.99    0.16
  -6  -3   4    3.91    0.17
  -6  -3   4    3.85    0.15
  -6  -3   4    3.89    0.16
  -6  -3   4    4.10    0.14
   5   3  -4    0.07    0.03
  -5  -3   4    0.02    0.02
  -5  -3   4    0.03    0.02
   4   3  -4    0.26    0.03
  -4  -3   4    0.27    0.04
  -4  -3   4    0.25    0.04
  -4  -3   4    0.30    0.03
  -3  -3   4    2.70    0.11
  -3  -3   4    2.64    0.10
  -3  -3   4    2.71    0.11
   2   3  -4    7.82    0.28
  -2  -3   4    7.29    0.28
  -2  -3   4    7.31    0.28
   1   3  -4   62.75    2.30
  -1  -3   4   61.30    2.30
  -1  -3   4   62.46    2.31
   0   3  -4    4.24    0.17
   0  -3   4    4.60    0.17
  -1   3  -4    4.48    0.19
   1  -3   4    5.40    0.19
  -2   3  -4    0.42    0.03
  -2   3  -4    0.37    0.02
   2  -3   4    0.40    0.03
   2  -3   4    0.40    0.03
  -3   3  -4   60.57    2.28
  -3   3  -4   59.12    2.02
  -3   3  -4   62.46    2.26
  -3   3  -4   64.56    2.10
  -4   3  -4    4.90    0.18
   4  -3   4    4.47    0.20
  -5   3  -4    0.45    0.04
  -5   3  -4    0.52    0.06
   5  -3   4    0.45    0.04
   5  -3   4    0.45    0.05
  -6   3  -4    0.15    0.03
  -6   3  -4    0.12    0.03
  -6   3  -4    0.20    0.03
  -6   3  -4    0.15    0.03
  -6   3  -4    0.21    0.05
   6  -3   4    0.21    0.03
   6  -3   4    0.14    0.03
  -7   3  -4    1.69    0.07
  -7   3  -4    1.75    0.08
  -7   3  -4    1.68    0.09
   7  -3   4    1.64    0.07
  -8   3  -4    2.02    0.07
  -8   3  -4    2.05    0.07
   8  -3   4    1.96    0.07
   9   2  -4    0.05    0.01
  -9  -2   4    0.07    0.01
  -9  -2   4    0.04    0.02
  -9  -2   4    0.04    0.01
   8   2  -4    0.09    0.03
  -8  -2   4    0.03    0.02
  -8  -2   4    0.03    0.02
  -8  -2   4    0.05    0.03
  -8  -2   4    0.05    0.02
   7   2  -4    3.72    0.15
  -7  -2   4    3.70    0.15
  -7  -2   4    3.72    0.13
  -7  -2   4    3.60    0.14
  -7  -2   4    3.63    0.13
  -7  -2   4    3.45    0.16
  -7  -2   4    3.27    0.13
   6   2  -4   11.91    0.43
  -6  -2   4   11.54    0.39
  -6  -2   4   12.24    0.36
  -6  -2   4   12.34    0.43
  -6  -2   4   11.79    0.46
   5   2  -4    1.63    0.08
  -5  -2   4    1.59    0.08
  -5  -2   4    1.66    0.08
   4   2  -4   28.87    0.96
  -4  -2   4   25.61    1.04
  -4  -2   4   28.70    0.91
  -4  -2   4   28.94    1.04
  -4  -2   4   28.44    0.97
   3   2  -4    1.02    0.05
  -3  -2   4    1.00    0.05
  -3  -2   4    1.03    0.05
   2   2  -4   51.20    1.86
  -2  -2   4   50.49    1.86
  -2  -2   4   49.74    1.87
   1   2  -4   76.99    2.84
  -1  -2   4   75.44    2.85
  -1  -2   4   78.76    2.85
   0   2  -4    0.13    0.01
   0  -2   4    0.11    0.01
   0  -2   4    0.13    0.01
  -1   2  -4   35.20    1.34
   1  -2   4   36.97    1.33
  -2   2  -4    1.06    0.04
  -2   2  -4    0.96    0.05
   2  -2   4    1.03    0.05
   2  -2   4    0.97    0.05
  -3   2  -4   15.55    0.63
  -3   2  -4   18.38    0.59
   3  -2   4   17.40    0.59
  -4   2  -4    6.33    0.24
   4  -2   4    6.33    0.23
   4  -2   4    6.37    0.25
  -5   2  -4    1.43    0.08
  -5   2  -4    1.56    0.10
   5  -2   4    1.60    0.08
   5  -2   4    1.54    0.07
  -6   2  -4   10.57    0.37
  -6   2  -4   11.16    0.36
  -6   2  -4   10.99    0.34
  -6   2  -4   11.53    0.40
  -6   2  -4   10.92    0.35
   6  -2   4   11.34    0.37
   6  -2   4   11.25    0.33
  -7   2  -4    0.18    0.03
  -7   2  -4    0.23    0.05
  -7   2  -4    0.23    0.03
  -7   2  -4    0.22    0.03
   7  -2   4    0.20    0.03
  -8   2  -4    0.99    0.04
  -8   2  -4    0.94    0.04
   8  -2   4    0.94    0.04
   9   1  -4    0.01    0.01
  -9  -1   4    0.03    0.02
  -9  -1   4    0.02    0.01
  -9  -1   4    0.03    0.01
  -8  -1   4    0.03    0.02
  -8  -1   4    0.02    0.02
  -8  -1   4    0.02    0.02
  -8  -1   4    0.02    0.03
   7   1  -4    0.14    0.03
  -7  -1   4    0.12    0.03
  -7  -1   4    0.14    0.03
  -7  -1   4    0.11    0.03
  -7  -1   4    0.09    0.03
  -7  -1   4    0.11    0.04
  -7  -1   4    0.14    0.03
  -7  -1   4    0.15    0.04
   6   1  -4   23.24    0.81
  -6  -1   4   23.16    0.68
  -6  -1   4   22.96    0.81
  -6  -1   4   24.18    0.87
  -6  -1   4   22.89    0.73
   5   1  -4   11.48    0.41
  -5  -1   4   11.50    0.44
  -5  -1   4   11.46    0.41
   4   1  -4    1.59    0.07
  -4  -1   4    1.51    0.07
  -4  -1   4    1.60    0.07
  -4  -1   4    1.44    0.08
   3   1  -4    0.36    0.03
  -3  -1   4    0.32    0.03
  -3  -1   4    0.36    0.03
  -2  -1   4  399.48   14.68
  -1  -1   4   93.42    3.40
  -1  -1   4   91.31    3.41
   0   1  -4   19.82    0.72
   0   1  -4   18.68    0.72
   0  -1   4   19.41    0.72
   0  -1   4   20.09    0.72
  -1   1  -4    2.17    0.09
   1  -1   4    2.22    0.09
  -2   1  -4    8.96    0.34
  -2   1  -4    9.14    0.35
   2  -1   4    9.28    0.34
  -3   1  -4    6.24    0.22
  -3   1  -4    6.19    0.23
   3  -1   4    5.93    0.22
   4  -1   4    0.29    0.03
   4  -1   4    0.30    0.05
  -5   1  -4    0.23    0.05
  -5   1  -4    0.16    0.03
   5  -1   4    0.23    0.03
   5  -1   4    0.22    0.03
   5  -1   4    0.19    0.03
  -6   1  -4    4.32    0.15
  -6   1  -4    4.23    0.17
  -6   1  -4    4.10    0.17
   6  -1   4    4.32    0.14
  -7   1  -4    2.34    0.09
  -7   1  -4    2.12    0.11
  -7   1  -4    2.33    0.09
  -7   1  -4    2.33    0.09
   7  -1   4    2.41    0.09
  -8   1  -4    0.02    0.01
  -8   1  -4    0.01    0.02
   8  -1   4    0.00    0.01
   9   0  -4    0.33    0.03
  -9   0   4    0.36    0.03
  -9   0   4    0.30    0.03
  -9   0   4    0.35    0.03
   8   0  -4    2.53    0.11
  -8   0   4    2.65    0.10
  -8   0   4    2.58    0.10
  -8   0   4    2.52    0.11
  -8   0   4    2.47    0.09
  -7   0   4    5.16    0.17
  -7   0   4    4.65    0.16
  -7   0   4    4.96    0.17
  -7   0   4    5.11    0.22
  -7   0   4    5.04    0.18
  -7   0   4    5.09    0.18
  -7   0   4    5.08    0.20
   6   0  -4    0.20    0.03
  -6   0   4    0.10    0.03
  -6   0   4    0.19    0.04
  -6   0   4    0.24    0.04
  -6   0   4    0.14    0.03
  -6   0   4    0.18    0.04
   5   0  -4    9.50    0.35
  -5   0   4    9.80    0.37
  -5   0   4    9.74    0.35
  -4   0   4   46.25    1.61
  -4   0   4   48.02    1.74
   3   0  -4    2.59    0.11
  -3   0   4    2.59    0.11
  -3   0   4    3.14    0.10
  -3   0   4    2.60    0.11
  -1   0   4  345.68   12.70
   0   0  -4   11.00    0.38
   0   0   4    9.87    0.38
   0   0   4   10.11    0.38
   0   0   4   10.46    0.38
  -1   0  -4   13.84    0.51
   1   0   4   13.90    0.52
  -3   0  -4  141.05    4.84
  -3   0  -4  146.22    5.21
   3   0   4  139.45    4.82
   4   0   4   16.39    0.61
   4   0   4   15.55    0.55
  -5   0  -4    9.69    0.34
  -5   0  -4   10.34    0.36
  -5   0  -4   10.26    0.32
   5   0   4   10.00    0.34
   5   0   4   10.03    0.36
   5   0   4   10.08    0.32
  -6   0  -4    4.14    0.17
  -6   0  -4    4.22    0.17
  -6   0  -4    4.49    0.15
  -7   0  -4    4.70    0.16
  -7   0  -4    4.77    0.17
  -7   0  -4    4.95    0.16
   7   0   4    4.90    0.16
  -8   0  -4    0.71    0.04
   8   0   4    0.67    0.03
   9  -1  -4    0.02    0.01
  -9   1   4    0.05    0.01
  -9   1   4    0.02    0.01
  -9   1   4    0.02    0.02
   8  -1  -4    0.06    0.03
  -8   1   4    0.01    0.02
  -8   1   4    0.02    0.02
  -8   1   4    0.03    0.03
  -8   1   4    0.01    0.02
   7  -1  -4    0.11    0.03
  -7   1   4    0.10    0.03
  -7   1   4    0.18    0.03
  -7   1   4    0.10    0.04
  -7   1   4    0.12    0.02
  -7   1   4    0.11    0.03
  -7   1   4    0.16    0.04
  -7   1   4    0.14    0.03
  -7   1   4    0.23    0.05
   6  -1  -4   23.77    0.79
  -6   1   4   23.47    0.85
  -6   1   4   22.31    0.64
  -6   1   4   22.50    0.66
  -6   1   4   22.76    0.71
  -6   1   4   21.25    0.79
   5  -1  -4   11.16    0.41
  -5   1   4   11.98    0.44
  -5   1   4   11.58    0.41
  -4   1   4    1.56    0.07
  -4   1   4    1.53    0.07
   3  -1  -4    0.32    0.03
   3  -1  -4    0.39    0.02
  -3   1   4    0.37    0.03
  -3   1   4    0.37    0.03
  -2   1   4  482.86   17.51
  -2   1   4  470.38   17.45
   1  -1  -4  100.32    3.90
  -1   1   4  117.42    3.91
  -1   1   4  115.24    3.91
  -1   1   4   91.30    3.89
   0   1   4   18.64    0.69
   0   1   4   18.82    0.69
   0   1   4   18.90    0.69
  -1  -1  -4    2.13    0.08
   1   1   4    2.10    0.08
  -2  -1  -4    8.78    0.32
  -3  -1  -4    6.18    0.23
  -3  -1  -4    6.24    0.23
   3   1   4    6.24    0.21
   3   1   4    6.32    0.22
   4   1   4    0.37    0.03
   4   1   4    0.27    0.04
   4   1   4    0.25    0.03
  -5  -1  -4    0.22    0.03
  -5  -1  -4    0.25    0.04
  -5  -1  -4    0.24    0.06
   5   1   4    0.20    0.03
   5   1   4    0.30    0.04
  -6  -1  -4    4.47    0.18
  -6  -1  -4    4.26    0.18
   6   1   4    4.41    0.17
   6   1   4    5.12    0.18
   6   1   4    4.98    0.15
  -7  -1  -4    2.43    0.10
  -7  -1  -4    2.47    0.09
  -7  -1  -4    2.38    0.09
   7   1   4    2.43    0.09
  -8  -1  -4    0.03    0.01
  -8  -1  -4    0.01    0.02
   8   1   4    0.02    0.01
   9  -2  -4    0.04    0.01
  -9   2   4    0.03    0.01
  -9   2   4    0.05    0.01
  -9   2   4    0.04    0.02
  -8   2   4    0.07    0.03
  -8   2   4    0.05    0.02
  -8   2   4    0.02    0.02
  -8   2   4    0.05    0.02
   7  -2  -4    3.72    0.15
  -7   2   4    3.68    0.15
  -7   2   4    3.68    0.13
  -7   2   4    3.75    0.13
  -7   2   4    3.31    0.16
  -7   2   4    3.68    0.13
  -7   2   4    3.72    0.13
  -7   2   4    3.67    0.14
   6  -2  -4   12.54    0.44
  -6   2   4   12.42    0.37
  -6   2   4   12.39    0.37
  -6   2   4   12.24    0.40
  -6   2   4   12.33    0.48
  -6   2   4   12.56    0.44
  -6   2   4   12.39    0.36
   5  -2  -4    1.60    0.08
  -5   2   4    1.73    0.08
  -5   2   4    1.61    0.08
   4  -2  -4   26.98    1.01
  -4   2   4   27.22    0.93
  -4   2   4   27.41    1.01
   3  -2  -4    1.06    0.05
   3  -2  -4    1.02    0.05
  -3   2   4    0.99    0.05
  -3   2   4    1.02    0.05
  -3   2   4    0.98    0.05
  -3   2   4    1.06    0.05
  -3   2   4    1.06    0.05
   2  -2  -4   48.89    1.82
   2  -2  -4   50.22    1.82
  -2   2   4   48.35    1.82
  -2   2   4   51.06    1.83
  -2   2   4   48.86    1.82
   1  -2  -4   77.37    2.79
  -1   2   4   72.99    2.78
  -1   2   4   74.85    2.79
  -1   2   4   77.74    2.79
  -1  -2  -4   33.71    1.25
   1   2   4   34.17    1.25
  -2  -2  -4    1.00    0.04
   2   2   4    1.07    0.05
  -3  -2  -4   17.66    0.65
  -3  -2  -4   17.96    0.62
   3   2   4   18.10    0.61
   3   2   4   17.27    0.58
   4   2   4    6.41    0.23
   4   2   4    6.45    0.22
  -5  -2  -4    1.53    0.08
  -5  -2  -4    1.71    0.10
  -5  -2  -4    1.57    0.09
   5   2   4    1.98    0.08
  -6  -2  -4   11.36    0.36
  -6  -2  -4   10.68    0.38
  -6  -2  -4   11.73    0.36
   6   2   4   11.65    0.34
  -7  -2  -4    0.19    0.03
  -7  -2  -4    0.30    0.04
  -8  -2  -4    0.91    0.05
  -8  -2  -4    0.96    0.04
   8   2   4    0.94    0.04
   9  -3  -4    2.53    0.08
  -9   3   4    2.55    0.09
  -9   3   4    2.56    0.08
  -9   3   4    2.42    0.09
  -8   3   4    0.00    0.02
  -8   3   4    0.04    0.02
  -8   3   4    0.03    0.02
  -8   3   4    0.01    0.02
   7  -3  -4    0.20    0.04
  -7   3   4    0.17    0.03
  -7   3   4    0.18    0.03
  -7   3   4    0.16    0.03
  -7   3   4    0.16    0.04
  -7   3   4    0.15    0.03
  -7   3   4    0.16    0.03
  -7   3   4    0.20    0.03
   6  -3  -4    3.87    0.16
  -6   3   4    4.08    0.14
  -6   3   4    4.03    0.14
  -6   3   4    4.09    0.13
  -6   3   4    3.71    0.16
  -6   3   4    3.95    0.17
   5  -3  -4    0.02    0.03
  -5   3   4    0.02    0.02
  -5   3   4    0.03    0.03
   4  -3  -4    0.26    0.03
  -4   3   4    0.24    0.03
   3  -3  -4    2.74    0.11
   3  -3  -4    2.86    0.11
  -3   3   4    2.78    0.10
  -3   3   4    2.76    0.11
  -3   3   4    2.82    0.11
  -3   3   4    2.77    0.11
  -3   3   4    2.77    0.11
   2  -3  -4    8.09    0.29
   2  -3  -4    7.97    0.29
  -2   3   4    7.44    0.29
  -2   3   4    7.65    0.29
   1  -3  -4   61.32    2.20
   1  -3  -4   61.12    2.20
  -1   3   4   56.73    2.19
  -1   3   4   60.19    2.21
   0  -3  -4    4.48    0.17
   0   3   4    4.21    0.17
   0   3   4    4.38    0.17
   0   3   4    4.60    0.17
  -1  -3  -4    4.54    0.17
   1   3   4    4.27    0.17
   1   3   4    4.56    0.17
   2   3   4    0.41    0.03
  -3  -3  -4   60.43    2.23
  -3  -3  -4   63.89    2.08
   3   3   4   61.19    2.07
   3   3   4   58.16    1.96
   4   3   4    4.58    0.16
   4   3   4    4.31    0.19
   4   3   4    4.71    0.17
  -5  -3  -4    0.41    0.05
  -5  -3  -4    0.41    0.04
  -5  -3  -4    0.56    0.07
   5   3   4    0.45    0.04
   5   3   4    0.46    0.04
  -6  -3  -4    0.15    0.06
  -6  -3  -4    0.15    0.03
  -6  -3  -4    0.15    0.03
   6   3   4    0.16    0.03
  -7  -3  -4    1.75    0.07
  -7  -3  -4    1.68    0.07
   7   3   4    1.75    0.07
  -8  -3  -4    2.10    0.08
  -8  -3  -4    2.02    0.07
   8   3   4    1.96    0.07
   9  -4  -4    0.45    0.03
  -9   4   4    0.42    0.03
  -9   4   4    0.42    0.03
  -9   4   4    0.44    0.03
  -8   4   4    0.30    0.03
  -8   4   4    0.36    0.04
  -8   4   4    0.33    0.03
  -8   4   4    0.34    0.04
   7  -4  -4    0.71    0.06
  -7   4   4    0.60    0.05
  -7   4   4    0.68    0.05
  -7   4   4    0.71    0.05
  -7   4   4    0.59    0.07
  -7   4   4    0.60    0.05
  -7   4   4    0.67    0.05
   6  -4  -4   28.10    1.00
  -6   4   4   29.15    1.09
  -6   4   4   28.55    0.82
  -6   4   4   29.42    0.83
  -6   4   4   28.44    1.00
  -6   4   4   30.28    0.85
  -6   4   4   29.69    0.90
   5  -4  -4    1.43    0.07
  -5   4   4    1.38    0.07
  -5   4   4    1.37    0.08
  -5   4   4    1.42    0.08
  -5   4   4    1.49    0.07
   4  -4  -4    5.65    0.22
  -4   4   4    5.58    0.20
  -4   4   4    5.54    0.22
   3  -4  -4   13.95    0.51
   3  -4  -4   14.33    0.51
  -3   4   4   13.84    0.45
  -3   4   4   13.10    0.51
  -3   4   4   13.84    0.48
  -2   4   4   26.27    0.99
  -2   4   4   27.71    0.99
  -2   4   4   27.02    0.99
   1  -4  -4   19.27    0.67
   1  -4  -4   18.81    0.67
  -1   4   4   17.92    0.68
  -1   4   4   17.24    0.67
   0  -4  -4   69.82    2.50
   0   4   4   68.55    2.50
   0   4   4   66.36    2.49
   0   4   4   66.40    2.50
  -1  -4  -4    6.53    0.24
   1   4   4    6.32    0.24
   1   4   4    6.34    0.24
  -2  -4  -4    0.36    0.03
   2   4   4    0.34    0.04
   2   4   4    0.35    0.03
  -3  -4  -4    6.01    0.23
  -3  -4  -4    6.30    0.23
   3   4   4    6.19    0.22
  -4  -4  -4   10.38    0.36
   4   4   4    9.89    0.36
  -5  -4  -4    0.25    0.04
  -5  -4  -4    0.26    0.04
  -5  -4  -4    0.40    0.06
   5   4   4    0.29    0.04
  -6  -4  -4    1.15    0.07
  -6  -4  -4    1.01    0.09
  -6  -4  -4    1.15    0.07
   6   4   4    1.07    0.05
  -7  -4  -4    6.22    0.20
  -7  -4  -4    6.15    0.20
   7   4   4    6.20    0.19
   7   4   4    6.16    0.23
  -8  -4  -4    4.32    0.14
  -8  -4  -4    4.27    0.14
   8   4   4    4.40    0.13
   9  -5  -4    0.43    0.03
  -9   5   4    0.37    0.03
  -9   5   4    0.37    0.03
  -9   5   4    0.38    0.03
  -8   5   4    2.50    0.09
  -8   5   4    2.49    0.09
  -8   5   4    2.37    0.09
  -8   5   4    2.33    0.10
  -7   5   4    0.94    0.06
  -7   5   4    0.96    0.06
  -7   5   4    0.92    0.06
  -7   5   4    0.89    0.05
  -7   5   4    0.95    0.07
   6  -5  -4    0.26    0.04
  -6   5   4    0.25    0.04
  -6   5   4    0.25    0.04
  -6   5   4    0.26    0.04
  -6   5   4    0.23    0.04
  -6   5   4    0.22    0.03
  -6   5   4    0.27    0.03
   5  -5  -4    1.00    0.06
  -5   5   4    1.02    0.06
  -5   5   4    0.93    0.06
  -5   5   4    0.96    0.07
  -5   5   4    1.02    0.05
  -5   5   4    1.03    0.06
  -4   5   4   -0.01    0.02
  -4   5   4   -0.01    0.01
  -4   5   4   -0.01    0.01
  -3   5   4    5.85    0.22
  -3   5   4    5.94    0.22
  -3   5   4    5.67    0.21
  -2   5   4    1.32    0.06
  -1   5   4    1.30    0.06
  -1   5   4    1.36    0.05
  -1   5   4    1.40    0.05
   0  -5  -4    3.64    0.13
   0   5   4    3.43    0.13
   0   5   4    3.38    0.13
   0   5   4    3.64    0.13
  -1  -5  -4    7.91    0.30
   1   5   4    8.23    0.30
   1   5   4    8.02    0.30
   2   5   4   17.67    0.66
  -3  -5  -4   39.23    1.30
   3   5   4   36.49    1.29
   4   5   4    2.30    0.09
  -5  -5  -4    1.68    0.09
  -5  -5  -4    1.87    0.09
  -5  -5  -4    1.74    0.11
   5   5   4    1.84    0.08
  -6  -5  -4    6.63    0.25
  -6  -5  -4    6.99    0.23
  -6  -5  -4    7.07    0.26
  -6  -5  -4    7.02    0.23
   6   5   4    6.94    0.25
   6   5   4    6.86    0.22
   6   5   4    6.88    0.23
  -7  -5  -4    0.04    0.02
  -7  -5  -4   -0.01    0.02
   7   5   4    0.05    0.02
   7   5   4    0.06    0.03
  -8  -5  -4    0.25    0.03
  -8  -5  -4    0.23    0.03
  -8  -5  -4    0.27    0.03
   8   5   4    0.30    0.02
   9  -6  -4    0.32    0.02
  -9   6   4    0.32    0.02
  -9   6   4    0.31    0.02
  -9   6   4    0.26    0.03
  -8   6   4    0.28    0.03
  -8   6   4    0.37    0.03
  -8   6   4    0.35    0.03
  -7   6   4    2.72    0.13
  -7   6   4    2.87    0.12
  -7   6   4    2.73    0.10
  -7   6   4    2.66    0.11
  -7   6   4    2.72    0.10
  -7   6   4    2.88    0.11
   6  -6  -4    1.36    0.08
  -6   6   4    1.32    0.07
  -6   6   4    1.21    0.06
  -6   6   4    1.27    0.07
  -6   6   4    1.33    0.07
[truncated: 918,723 more chars]
